# Supplementary material for: Exploring the under-investigated “microbial dark matter” of drinking water treatment plants
Source: PubMed Central journal article supplement (PMC5349567; doi:10.1038/srep44350), 2017-03-14
Supplement: srep44350-s1.pdf [file srep44350-s1.pdf]

## **Exploring the under-investigated “microbial dark matter” of drinking water treatment plants**

Antonia Bruno<sup>1</sup>, Anna Sandionigi<sup>1</sup>, Ermanno Rizzi<sup>2,3</sup>, Marzia Bernasconi<sup>4</sup>, Saverio Vicario<sup>5</sup>, Andrea Galimberti<sup>1</sup>, Clementina Cocuzza<sup>6</sup>, Massimo Labra<sup>1</sup>, Maurizio Casiraghi<sup>1\*</sup>

<sup>1</sup> University of Milan-Bicocca, ZooPlantLab, Dept Biotechnology and Biosciences, Piazza della Scienza 2, 20126, Milan, Italy

<sup>2</sup> National Research Council (CNR), Institute of Biomedical Technologies (ITB), Via Fratelli Cervi, 93 - 20090 Segrate (MI) - Italy

<sup>3</sup> Fondazione Telethon Piazza Cavour, 1, Milano, Italy

<sup>4</sup> Metropolitana Milanese s.p.a., Via Giuseppe Meda 44, Milano, Italy

<sup>5</sup> National Research Council (CNR), Institute of Biomedical and Technologies (ITB), via Giovanni Amendola, 122/D, 70126, Bari, Italy

<sup>6</sup> University of Milan-Bicocca, Dept Medicine and Surgery, Via Cadore 48 , 20126, Monza, Italy

\*corresponding author

maurizio.casiraghi@unimib.it

### **README FILE**

#title: Table\_S1

Description: Description table of the samples.

#title: Table\_S2

Description: Table with relative abundance of the bacteria recovered.

#title: Table\_S3

Description: Water samples microbiological analyses

#title: Table\_S4

Description: Water samples physico-chemical analyses

#title: Table\_S5\_DistTurnoverBySample\_all\_samples

description: Phylogenetic turnover distance matrix by sample. All 84 sample are considered.

#title: Table\_S6\_DistTurnoverBySample\_site1

Description: Phylogenetic turnover distance matrix by sample. Only sample of Site 1 and with identical carbon filter are considered.

#title: Figure\_S1

Description: Pie chart of microbial composition of water samples

#title: Figure\_S2

Description: Figure reporting change over time and sampling points within a DWTP, expressed as turnover

#title:output\_phyloh\_site1

Description: PhyloH output that can be viewed with any web browser. Only sample of Site 1 and with identical carbon filter are considered.

#title: phyloh\_output\_all\_sample

Description: PhyloH output that can be viewed with any web browser. All 84 sample are considered.

| #SampleID | DWTP   | Sampling point                              | Date   | External T (°C) | Weather    |
|-----------|--------|---------------------------------------------|--------|-----------------|------------|
| 3A.s      | Site 1 | groundwater                                 | Dec-13 | 7               | sunny      |
| 3B.s      | Site 1 | outlet of granular activated carbon filters | Dec-13 | 7               | sunny      |
| 3C.s      | Site 1 | outlet of chlorination basin                | Dec-13 | 7               | sunny      |
| 4A.s      | Site 1 | groundwater                                 | Jan-14 | 1               | cloudy     |
| 4B.s      | Site 1 | outlet of granular activated carbon filters | Jan-14 | 1               | cloudy     |
| 4C.s      | Site 1 | outlet of chlorination basin                | Jan-14 | 1               | cloudy     |
| 5A.s      | Site 1 | groundwater                                 | Feb-14 | 8               | rain       |
| 5B.s      | Site 1 | outlet of granular activated carbon filters | Feb-14 | 8               | rain       |
| 5C.s      | Site 1 | outlet of chlorination basin                | Feb-14 | 8               | rain       |
| 6A.s      | Site 1 | groundwater                                 | Mar-14 | 14              | sunny      |
| 6B.s      | Site 1 | outlet of granular activated carbon filters | Mar-14 | 14              | sunny      |
| 6C.s      | Site 1 | outlet of chlorination basin                | Mar-14 | 14              | sunny      |
| 7A.s      | Site 1 | groundwater                                 | Apr-14 | 18              | sunny      |
| 7B.s      | Site 1 | outlet of granular activated carbon filters | Apr-14 | 18              | sunny      |
| 7C.s      | Site 1 | outlet of chlorination basin                | Apr-14 | 18              | sunny      |
| 8A.s      | Site 1 | groundwater                                 | May-14 | 19              | sunny      |
| 8B.s      | Site 1 | outlet of granular activated carbon filters | May-14 | 19              | sunny      |
| 8C.s      | Site 1 | outlet of chlorination basin                | May-14 | 19              | sunny      |
| 9A.s      | Site 1 | groundwater                                 | Jun-14 | 16              | thunderous |
| 9B.s      | Site 1 | outlet of granular activated carbon filters | Jun-14 | 16              | thunderous |
| 9C.s      | Site 1 | outlet of chlorination basin                | Jun-14 | 16              | thunderous |
| 10A.s     | Site 1 | groundwater                                 | Jul-14 | 28              | sunny      |

|         |        |                                             |         |    |       |
|---------|--------|---------------------------------------------|---------|----|-------|
| 10B.s   | Site 1 | outlet of granular activated carbon filters | Jul-14  | 28 | sunny |
| 10C.s   | Site 1 | outlet of chlorination basin                | Jul-14  | 28 | sunny |
| 11A.s   | Site 1 | groundwater                                 | Aug-14  | 25 | sunny |
| 11B.s   | Site 1 | outlet of granular activated carbon filters | Aug-14  | 25 | sunny |
| 11C.s   | Site 1 | outlet of chlorination basin                | Aug-14  | 25 | sunny |
| 12A.s   | Site 1 | groundwater                                 | Sept-14 | 21 | sunny |
| 12B.s   | Site 1 | outlet of granular activated carbon filters | Sept-14 | 21 | sunny |
| 12C.s   | Site 1 | outlet of chlorination basin                | Sept-14 | 21 | sunny |
| 13A.s   | Site 1 | groundwater                                 | Oct-14  | 16 | rain  |
| 13B.s   | Site 1 | outlet of granular activated carbon filters | Oct-14  | 16 | rain  |
| 13C.s   | Site 1 | outlet of chlorination basin                | Oct-14  | 16 | rain  |
| 14A.s   | Site 1 | groundwater                                 | Nov-14  | 10 | sunny |
| 14B.s   | Site 1 | outlet of granular activated carbon filters | Nov-14  | 10 | sunny |
| 14C.s   | Site 1 | outlet of chlorination basin                | Nov-14  | 10 | sunny |
| 1A_cr.s | Site 2 | groundwater                                 | Oct-14  | 16 | rain  |
| 1B_cr.s | Site 2 | outlet of granular activated carbon filters | Oct-14  | 16 | rain  |
| 1C_cr.s | Site 2 | outlet of chlorination basin                | Oct-14  | 16 | rain  |
| 2A_cr.s | Site 2 | groundwater                                 | Nov-14  | 10 | sunny |
| 2B_cr.s | Site 2 | outlet of granular activated carbon filters | Nov-14  | 10 | sunny |
| 2C_cr.s | Site 2 | outlet of chlorination basin                | Nov-14  | 10 | sunny |

| Sample  | Other Bacteria | Parcubacteria (OD1) | OP1      | Microgenomates (OP11) | OP3         | Dependentiae (TM6) | Saccharibacteria (TM7) | WS3       |
|---------|----------------|---------------------|----------|-----------------------|-------------|--------------------|------------------------|-----------|
| 1A.cr.s | 0.987770935    | 0.002856371         | 0        | 0.000211854           | 0.007246853 | 7.31E-06           | 0.001709439            | 0.0002411 |
| 1B.cr.s | 0.584005566    | 0.394365757         | 0        | 0.000812932           | 0.019377482 | 0                  | 0.001336648            | 0.0001329 |
| 1C.cr.s | 0.567316017    | 0.406969697         | 0        | 0                     | 0.023419913 | 0.002640693        | 0                      | 0         |
| 2A.cr.s | 0.954859375    | 0.01084375          | 0        | 0.001234375           | 0.0298125   | 0                  | 0.00325                | 0         |
| 2B.cr.s | 0.569904656    | 0.40557527          | 0        | 0.000983368           | 0.020586601 | 0.00043824         | 0.002939416            | 0         |
| 2C.cr.s | 0.811387975    | 0.172538089         | 0        | 0                     | 0.015361402 | 0                  | 0.00182325             | 0         |
| 3A.s    | 0.734159308    | 0.164601729         | 0        | 0.015255883           | 0.075664556 | 0.000295872        | 0.001257455            | 0.0128057 |
| 3B.s    | 0.37907161     | 0.600296444         | 0        | 0.002624131           | 0.016170168 | 0.000243885        | 0.000958526            | 0.0012743 |
| 3C.s    | 0.357099684    | 0.622341695         | 0        | 2.39E-05              | 0.020693824 | 0                  | 0                      | 1.59E-05  |
| 4A.s    | 0.911784633    | 0.038659901         | 0        | 0.002945121           | 0.045103218 | 0                  | 0.000345672            | 0.0017284 |
| 4B.s    | 0.373099874    | 0.610043992         | 0        | 0.002504465           | 0.013328107 | 0.000152446        | 0.000675117            | 0.0006098 |
| 4C.s    | 0.744383425    | 0.248190215         | 0        | 0.000124813           | 0.007988018 | 0                  | 0                      | 0         |
| 5A.s    | 0.788097389    | 0.08901517          | 0.000131 | 0.006198583           | 0.109096961 | 0.00098911         | 0.002073327            | 0.005414  |
| 5B.s    | 0.254136852    | 0.730980421         | 0        | 0.000465862           | 0.013416816 | 0.000263988        | 0.000121124            | 0.0008137 |
| 5C.s    | 0.386389584    | 0.591596459         | 0        | 0.002766511           | 0.017245157 | 0.000338554        | 0.001097497            | 0.0011378 |
| 6A.s    | 0.736283277    | 0.151987594         | 0        | 0.018506074           | 0.087516154 | 0.001530111        | 0.001623158            | 0.0056655 |
| 6B.s    | 0.30172487     | 0.669697227         | 0        | 0.002662362           | 0.025065851 | 0.000141615        | 0.000481491            | 0.0014728 |
| 6C.s    | 0.152578382    | 0.834154851         | 0        | 0.001621916           | 0.010677615 | 0.000190068        | 0.001081277            | 2.11E-05  |
| 7A.s    | 0.795978517    | 0.068272967         | 0        | 0.004417065           | 0.125561905 | 0.000171992        | 0.002384433            | 0.0033851 |
| 7B.s    | 0.467710072    | 0.505654144         | 0        | 0.001089955           | 0.018146054 | 0.000485371        | 0.006548248            | 0.0004513 |
| 7C.s    | 0.569095066    | 0.411592659         | 0        | 0.002855318           | 0.011235992 | 0.000267996        | 0.004658503            | 0.0007246 |
| 8A.s    | 0.871273352    | 0.00269819          | 0        | 0.000120995           | 0.121442745 | 0.001996419        | 0.002794986            | 0         |
| 8B.s    | 0.362591687    | 0.605145105         | 0        | 0.001009886           | 0.018844123 | 0.000903582        | 0.011448921            | 9.57E-05  |
| 8C.s    | 0.424044103    | 0.551825559         | 0        | 0.000138592           | 0.021250712 | 1.54E-05           | 0.002725635            | 0         |
| 9A.s    | 0.758343137    | 0.110189256         | 0        | 0.009411182           | 0.111737147 | 0.000165109        | 0.003033868            | 0.0087507 |
| 9B.s    | 0.472762236    | 0.474245149         | 0        | 0.00291799            | 0.041425893 | 0.000583598        | 0.007338028            | 0.000928  |
| 9C.s    | 0.342837591    | 0.618971585         | 0        | 0.000130344           | 0.034801877 | 0                  | 0.001433785            | 0.0020203 |
| 10A.s   | 0.898645619    | 0.056886072         | 0        | 0.007913587           | 0.032519732 | 0.000093837        | 0.001126044            | 0.003889  |

|       |             |             |          |             |             |             |             |           |
|-------|-------------|-------------|----------|-------------|-------------|-------------|-------------|-----------|
| 10B.s | 0.764289699 | 0.210212662 | 0        | 0.002816442 | 0.015089051 | 0           | 0.006326789 | 0.0015647 |
| 10C.s | 0.677496346 | 0.283890544 | 0        | 0.001350626 | 0.033025588 | 0.00096209  | 0.002368221 | 0.0012581 |
| 11A.s | 0.941085415 | 0.029627566 | 0.00031  | 0.001331228 | 0.026376892 | 0.000897805 | 0.000959723 | 0.0002167 |
| 11B.s | 0.511375135 | 0.461767402 | 0.000137 | 0.000559531 | 0.017899023 | 0.000273813 | 0.00767271  | 0.0004524 |
| 11C.s | 0.649431579 | 0.326905263 | 0        | 0.00151579  | 0.014484211 | 0.000336842 | 0.007073684 | 0.0005895 |
| 12A.s | 0.858271115 | 0.075973633 | 5.61E-06 | 0.007656779 | 0.044253492 | 0.003323917 | 0.001378893 | 0.0097139 |
| 12B.s | 0.538165721 | 0.436519898 | 0        | 0.004541689 | 0.013374829 | 0.00101246  | 0.0054995   | 0.0017229 |
| 12C.s | 0.763000324 | 0.206852142 | 0        | 0.003816485 | 0.021678444 | 0.002852249 | 0.001800356 | 0         |
| 13A.s | 0.895913718 | 0.030433122 | 0        | 0.003621423 | 0.067371637 | 0           | 0.000961323 | 0.0016988 |
| 13B.s | 0.464865208 | 0.506943858 | 0        | 0.001683146 | 0.016817375 | 0.000598608 | 0.008803065 | 0.0004859 |
| 13C.s | 0.846733668 | 0.118181634 | 0        | 0.004265278 | 0.025662587 | 0.001195494 | 0.003991733 | 1.01E-05  |
| 14A.s | 0.796144354 | 0.071024631 | 0        | 0.022735074 | 0.080929343 | 0.000367749 | 0.001936813 | 0.0274831 |
| 14B.s | 0.987257609 | 0.007563406 | 0        | 0.000519682 | 0.004585427 | 0.000267483 | 0.000323527 | 0.0004942 |
| 14C.s | 0.977647538 | 0.000251054 | 0        | 0.000649278 | 0.009029287 | 0           | 0.012033278 | 0.0003896 |

| #SampleID | Coliforms at 37°C (MPN / 100 mL) | Enterococci (MPN / 100mL) | <i>Escherichia coli</i> (MPN / 100mL) | <i>Pseudomonas aeruginosa</i> (CFU / 250mL) | <i>Clostridium perfringens</i> (and spores) |
|-----------|----------------------------------|---------------------------|---------------------------------------|---------------------------------------------|---------------------------------------------|
| 3C.s      | 0                                | 0                         | 0                                     | 0                                           | NA                                          |
| 4C.s      | 0                                | 0                         | 0                                     | NA                                          | 0                                           |
| 5C.s      | 0                                | 0                         | 0                                     | 0                                           | NA                                          |
| 6C.s      | 0                                | 0                         | 0                                     | NA                                          | 0                                           |
| 7C.s      | 0                                | 0                         | 0                                     | 0                                           | NA                                          |
| 8C.s      | 0                                | 0                         | 0                                     | NA                                          | 0                                           |
| 9C.s      | 0                                | 0                         | 0                                     | 0                                           | NA                                          |
| 10C.s     | 0                                | 0                         | 0                                     | NA                                          | 0                                           |
| 11C.s     | 0                                | 0                         | 0                                     | 0                                           | NA                                          |
| 12C.s     | 0                                | 0                         | 0                                     | NA                                          | 0                                           |
| 13C.s     | 0                                | 0                         | 0                                     | 0                                           | NA                                          |
| 14C.s     | 0                                | 0                         | 0                                     | NA                                          | 0                                           |
| 1C_cr.s   | 0                                | 0                         | 0                                     | 0                                           | NA                                          |
| 2C_cr.s   | 0                                | 0                         | 0                                     | NA                                          | 0                                           |

The methods for microbiological parameters are:

- (a) *Escherichia coli* (*E. coli*) and coliform bacteria (EN ISO 9308-1 or EN ISO 9308-2)
- (b) *Enterococci* (EN ISO 7899-2)
- (c) *Pseudomonas aeruginosa* (EN ISO 16266)
- (d) *Clostridium perfringens* including spores (EN ISO 14189).

- (a) The Colilert system (IDEXX Laboratories) was used according to the manufacturer's instructions. 100 mL of drinking water was mixed with the substrate and incubated in a 51 well QuantiTray for 24 h at  $37 \pm 1^\circ\text{C}$ . Total coliform-positive wells displayed a yellow colour, whereas *E. coli*-positive wells were yellow and fluoresced under UV light (365 nm). Counts of the number of positive wells were transferred to a Most Probable Number (MPN) of the target organisms.
- (b) The Enterolert system (IDEXX Laboratories) was used according to the manufacturer's instructions. 100 mL of drinking water was mixed with the substrate and incubated in a 51 well QuantiTray for 24 h at  $41 \pm 0.5^\circ\text{C}$ . Total enterococci-positive wells fluoresced under UV light (365 nm). Counts of the number of positive wells were transferred to a Most Probable Number (MPN) of the target organisms.
- (c) Membrane filtration followed by incubation of the membrane on CN agar at  $(36 \pm 2)^\circ\text{C}$  for  $(44 \pm 4)$  h. Count all colonies that produce blue/green (pyocyanin) colour.
- (d) Membrane filtration followed by anaerobic incubation of the membrane on m-CP agar at  $44 \pm 1^\circ\text{C}$  for  $21 \pm 3$  hours. Count opaque yellow colonies that turn pink or red after exposure to ammonium hydroxide vapours for 20 to 30 seconds.



| #SampleID | Alcalinity (mg/L) | Cl2(mg/L) | Colour (CU) | Conductivity at 20°C (µS/cm) | [H+] (pH) | Total hardness (°F) | Index of aggressivity | Dry residue at 180°C (mg/L) | Temperature (°C) | Turbidity (NTU) |
|-----------|-------------------|-----------|-------------|------------------------------|-----------|---------------------|-----------------------|-----------------------------|------------------|-----------------|
| 3A.s      | 200               | NA        | 0           | 716                          | 7.4       | 30                  | 12.14                 | 465.4                       | 14.6             | 0.01            |
| 3B.s      | NA                | NA        | NA          | NA                           | NA        | NA                  | NA                    | NA                          | NA               | NA              |
| 3C.s      | 203               | 0.02      | 0.19        | 704                          | 7.45      | 28                  | 12.38                 | 457.6                       | 12.9             | 0.06            |
| 4A.s      | 180.94            | NA        | <0.01       | 689.119                      | 7.64      | 32.31               | 12.4                  | 447.927                     | 14.3             | <0.010          |
| 4B.s      | NA                | NA        | NA          | NA                           | NA        | NA                  | NA                    | NA                          | NA               | NA              |
| 4C.s      | 171.56            | 0.03      | <0.01       | 617.309                      | 7.65      | 30.01               | 12.36                 | 401.251                     | 12.9             | <0.010          |
| 5A.s      | 174.28            | NA        | <0.01       | 720.201                      | 7.69      | 28.69               | 12.34                 | 468.131                     | 13.8             | <0.010          |
| 5B.s      | NA                | NA        | NA          | NA                           | NA        | NA                  | NA                    | NA                          | NA               | NA              |
| 5C.s      | 172.05            | 0.01      | <0.01       | 703.086                      | 7.6       | 28.57               | 12.25                 | 457.006                     | 14.5             | <0.010          |
| 6A.s      | 224.94            | NA        | <0.01       | 717.68                       | 8.04      | 33                  | 12.26                 | 466.492                     | 15.1             | <0.010          |
| 6B.s      | NA                | NA        | NA          | NA                           | NA        | NA                  | NA                    | NA                          | NA               | NA              |
| 6C.s      | 221.74            | 0.01      | <0.01       | 702.726                      | 7.81      | NA                  | NA                    | 456.772                     | 14.7             | <0.010          |
| 7A.s      | 210.58            | NA        | <0.01       | 728.947                      | 7.62      | 29.21               | 12.41                 | 473.816                     | 15.2             | <0.010          |
| 7B.s      | NA                | NA        | NA          | NA                           | NA        | NA                  | NA                    | NA                          | NA               | NA              |
| 7C.s      | 209.66            | 0.02      | <0.01       | 724.798                      | 7.63      | 29.15               | 12.42                 | 471.119                     | 15.6             | <0.010          |
| 8A.s      | 207.57            | NA        | <0.01       | 702.467                      | 7.55      | 28.99               | 12.33                 | 456.604                     | 15.5             | NA              |
| 8B.s      | NA                | NA        | NA          | NA                           | NA        | NA                  | NA                    | NA                          | NA               | NA              |
| 8C.s      | 207.59            | 0.02      | <0.01       | 680.313                      | 7.66      | <0.01               | <1.00                 | 442.203                     | 16               | NA              |
| 9A.s      | 207.34            | NA        | <0.01       | 711.002                      | 7.64      | 26.15               | 12.37                 | 462.151                     | 17.1             | NA              |
| 9B.s      | NA                | NA        | NA          | NA                           | NA        | NA                  | NA                    | NA                          | NA               | NA              |
| 9C.s      | 207.52            | 0.04      | <0.01       | 700.165                      | 7.53      | 29.48               | 12.32                 | 455.107                     | 16.3             | NA              |
| 10A.s     | 193.95            | NA        | <0.01       | 732.79                       | 7.62      | 28.34               | 12.36                 | 476.314                     | 17               | NA              |
| 10B.s     | NA                | NA        | NA          | NA                           | NA        | NA                  | NA                    | NA                          | NA               | NA              |
| 10C.s     | 191.08            | 0.01      | <0.01       | 697.342                      | 7.52      | 31.87               | 12.31                 | 453.272                     | 17.7             | NA              |
| 11A.s     | NA                | NA        | NA          | NA                           | NA        | NA                  | NA                    | NA                          | NA               | NA              |
| 11B.s     | NA                | NA        | NA          | NA                           | NA        | NA                  | NA                    | NA                          | NA               | NA              |
| 11C.s     | 210.94            | 0         | <0.01       | 725.479                      | 7.38      | 33.09               | 12.23                 | 471.561                     | 18.8             | NA              |
| 12A.s     | 206.69            | NA        | NA          | 735.464                      | 7.77      | 27.32               | 12.53                 | 478.052                     | NA               | NA              |
| 12B.s     | NA                | NA        | NA          | NA                           | NA        | NA                  | NA                    | NA                          | NA               | NA              |
| 12C.s     | 210.21            | 0.09      | NA          | 715.535                      | 7.61      | 28.02               | 12.38                 | 465.098                     | 16.3             | NA              |

|         |        |      |    |         |      |       |       |         |      |        |
|---------|--------|------|----|---------|------|-------|-------|---------|------|--------|
| 13A.s   | 212.17 | NA   | NA | 730.142 | 7.81 | 26.91 | 12.57 | 474.592 | NA   | <0.010 |
| 13B.s   | NA     | NA   | NA | NA      | NA   | NA    | NA    | NA      | NA   | NA     |
| 13C.s   | 201.82 | 0.1  | NA | 703.133 | 7.71 | 30.11 | 12.5  | 457.036 | 15.8 | <0.010 |
| 14A.s   | 205.37 | NA   | NA | 715.958 | 7.74 | 26.55 | 12.47 | 465.373 | NA   | <0.010 |
| 14B.s   | NA     | NA   | NA | NA      | NA   | NA    | NA    | NA      | NA   | NA     |
| 14C.s   | 204.95 | 0.24 | NA | 704.303 | 7.66 | 32.21 | 12.48 | 457.797 | 14.9 | <0.010 |
| 1A_cr.s | 203.81 | NA   | NA | 727.981 | 7.77 | 27.41 | 12.51 | 473.188 |      | <0.010 |
| 1B_cr.s | NA     | NA   | NA | NA      | NA   | NA    | NA    | NA      | NA   | NA     |
| 1C_cr.s | 202.33 | 0.1  | NA | 716.098 | 7.59 | 31.36 | 12.39 | 465.464 | 15.5 | <0.010 |
| 2A_cr.s | 207.82 | NA   | NA | 729.129 | 7.64 | 27.75 | 12.4  | 473.934 |      | <0.010 |
| 2B_cr.s | NA     | NA   | NA | NA      | NA   | NA    | NA    | NA      | NA   | NA     |
| 2C_cr.s | 199.06 | 0.03 | NA | 698.868 | 7.57 | 32.35 | 12.38 | 454.264 | 14.9 | <0.010 |

|           | 10A.r.s  | 10A.s    | 10B.r.s  | 10B.s    | 10C.r.s  | 10C.s    | 11A.r.s  | 11A.s    | 11B.r.s  | 11B.s    | 11C.r.s  | 11C.s    | 12A.r.s  | 12A.s    | 12B.r.s  |
|-----------|----------|----------|----------|----------|----------|----------|----------|----------|----------|----------|----------|----------|----------|----------|----------|
| 10A.r.s   |          |          |          |          |          |          |          |          |          |          |          |          |          |          |          |
| 10A.s     | 0.013333 |          |          |          |          |          |          |          |          |          |          |          |          |          |          |
| 10B.r.s   | 0.134235 | 0.148236 |          |          |          |          |          |          |          |          |          |          |          |          |          |
| 10B.s     | 0.129259 | 0.143160 | 0.007575 |          |          |          |          |          |          |          |          |          |          |          |          |
| 10C.r.s   | 0.146993 | 0.162163 | 0.017643 | 0.017368 |          |          |          |          |          |          |          |          |          |          |          |
| 10C.s     | 0.136735 | 0.151519 | 0.018238 | 0.024589 | 0.006099 |          |          |          |          |          |          |          |          |          |          |
| 11A.r.s   | 0.063784 | 0.060732 | 0.147008 | 0.142266 | 0.150356 | 0.138959 |          |          |          |          |          |          |          |          |          |
| 11A.s     | 0.064863 | 0.056976 | 0.154611 | 0.148788 | 0.159889 | 0.149428 | 0.014060 |          |          |          |          |          |          |          |          |
| 11B.r.s   | 0.169007 | 0.187949 | 0.026503 | 0.019840 | 0.018173 | 0.028052 | 0.177775 | 0.186713 |          |          |          |          |          |          |          |
| 11B.s     | 0.156508 | 0.174350 | 0.036214 | 0.026793 | 0.025471 | 0.035527 | 0.163262 | 0.172253 | 0.011414 |          |          |          |          |          |          |
| 11C.r.s   | 0.150190 | 0.165677 | 0.023109 | 0.026268 | 0.028589 | 0.029933 | 0.155535 | 0.163134 | 0.022007 | 0.027171 |          |          |          |          |          |
| 11C.s     | 0.163682 | 0.181595 | 0.019198 | 0.016008 | 0.014572 | 0.023464 | 0.173238 | 0.180944 | 0.009067 | 0.018375 | 0.014450 |          |          |          |          |
| 12A.r.s   | 0.055456 | 0.048624 | 0.142590 | 0.139118 | 0.157831 | 0.146774 | 0.067461 | 0.071746 | 0.182595 | 0.168858 | 0.159088 | 0.177197 |          |          |          |
| 12A.s     | 0.059913 | 0.053378 | 0.149597 | 0.145653 | 0.164683 | 0.153031 | 0.074504 | 0.078123 | 0.187936 | 0.174160 | 0.164210 | 0.181442 | 0.016025 |          |          |
| 12B.r.s   | 0.135489 | 0.155108 | 0.022486 | 0.026502 | 0.032913 | 0.034129 | 0.156152 | 0.167094 | 0.028716 | 0.033265 | 0.025249 | 0.024179 | 0.150094 | 0.151513 |          |
| 12B.s     | 0.142955 | 0.161055 | 0.019255 | 0.022201 | 0.030957 | 0.033859 | 0.165499 | 0.175497 | 0.028773 | 0.043859 | 0.036535 | 0.024350 | 0.154739 | 0.157356 | 0.013167 |
| 12C.r.s   | 0.133540 | 0.148612 | 0.022421 | 0.027261 | 0.017057 | 0.015217 | 0.132612 | 0.143581 | 0.035591 | 0.041035 | 0.033490 | 0.027121 | 0.144115 | 0.150617 | 0.032685 |
| 12C.s     | 0.119953 | 0.134002 | 0.037807 | 0.041512 | 0.035751 | 0.033465 | 0.119928 | 0.131091 | 0.050592 | 0.043987 | 0.037359 | 0.042317 | 0.129868 | 0.137040 | 0.035909 |
| 13A.r.s   | 0.089861 | 0.079247 | 0.219862 | 0.212412 | 0.219202 | 0.204880 | 0.064764 | 0.069502 | 0.251400 | 0.233744 | 0.224989 | 0.247527 | 0.080065 | 0.088353 | 0.227118 |
| 13A.s     | 0.087340 | 0.075003 | 0.220962 | 0.213111 | 0.221505 | 0.205824 | 0.060297 | 0.051278 | 0.252599 | 0.234882 | 0.226408 | 0.247861 | 0.086924 | 0.092869 | 0.233062 |
| 13B.r.s   | 0.184558 | 0.203435 | 0.029366 | 0.025144 | 0.022645 | 0.034156 | 0.194854 | 0.202504 | 0.016870 | 0.035565 | 0.035615 | 0.015132 | 0.199382 | 0.205251 | 0.032905 |
| 13B.s     | 0.154227 | 0.172375 | 0.032442 | 0.022521 | 0.032910 | 0.046207 | 0.165538 | 0.168058 | 0.022078 | 0.026062 | 0.034620 | 0.021355 | 0.168237 | 0.173936 | 0.033354 |
| 13C.r.s   | 0.112465 | 0.123689 | 0.040120 | 0.042464 | 0.036204 | 0.030354 | 0.104568 | 0.115161 | 0.057902 | 0.065901 | 0.058792 | 0.049422 | 0.116753 | 0.121158 | 0.049998 |
| 13C.s     | 0.123672 | 0.136564 | 0.028972 | 0.024625 | 0.023472 | 0.029038 | 0.125131 | 0.133397 | 0.037691 | 0.048098 | 0.046785 | 0.031290 | 0.131420 | 0.136236 | 0.041091 |
| 14A.r.s   | 0.063734 | 0.054982 | 0.189636 | 0.183578 | 0.198375 | 0.185122 | 0.059369 | 0.063497 | 0.228960 | 0.211256 | 0.202587 | 0.223371 | 0.064465 | 0.064852 | 0.195155 |
| 14A.s     | 0.064999 | 0.054945 | 0.198710 | 0.193411 | 0.210859 | 0.198358 | 0.077113 | 0.069015 | 0.241231 | 0.224456 | 0.213151 | 0.232614 | 0.067303 | 0.070076 | 0.209567 |
| 14B.r.s   | 0.052292 | 0.052092 | 0.130221 | 0.125165 | 0.143085 | 0.136335 | 0.069684 | 0.069996 | 0.167301 | 0.148637 | 0.142972 | 0.157989 | 0.073006 | 0.073549 | 0.130849 |
| 14B.s     | 0.043877 | 0.037768 | 0.148955 | 0.142681 | 0.163119 | 0.152340 | 0.057579 | 0.055401 | 0.186962 | 0.171036 | 0.160713 | 0.177469 | 0.054136 | 0.056127 | 0.154044 |
| 14C.r.s   | 0.139507 | 0.128998 | 0.216407 | 0.211322 | 0.222653 | 0.216188 | 0.114616 | 0.110582 | 0.246529 | 0.232179 | 0.214894 | 0.241041 | 0.121390 | 0.127117 | 0.230938 |
| 14C.s     | 0.147238 | 0.134083 | 0.222465 | 0.217760 | 0.229604 | 0.224404 | 0.121526 | 0.117530 | 0.253607 | 0.238847 | 0.221203 | 0.248047 | 0.123401 | 0.130697 | 0.238426 |
| 1A.cr.r.s | 0.093445 | 0.082274 | 0.183358 | 0.175702 | 0.184169 | 0.172714 | 0.056861 | 0.057651 | 0.210259 | 0.195995 | 0.184504 | 0.207273 | 0.074643 | 0.082576 | 0.195370 |
| 1A.cr.s   | 0.105215 | 0.093663 | 0.199957 | 0.192459 | 0.202772 | 0.191690 | 0.076312 | 0.074032 | 0.228981 | 0.213380 | 0.198967 | 0.225020 | 0.089257 | 0.095489 | 0.211456 |
| 1B.cr.r.s | 0.179484 | 0.196553 | 0.035908 | 0.030241 | 0.020655 | 0.031536 | 0.191976 | 0.199464 | 0.027511 | 0.043045 | 0.053212 | 0.024430 | 0.194649 | 0.196254 | 0.054129 |
| 1B.cr.s   | 0.097300 | 0.098147 | 0.123421 | 0.118049 | 0.125365 | 0.118974 | 0.095230 | 0.100667 | 0.136712 | 0.119292 | 0.116359 | 0.136513 | 0.098329 | 0.092659 | 0.120244 |
| 1C.cr.r.s | 0.190150 | 0.208178 | 0.040997 | 0.037394 | 0.024951 | 0.035706 | 0.200388 | 0.207627 | 0.033883 | 0.051181 | 0.060805 | 0.029153 | 0.205604 | 0.210339 | 0.062002 |













|           |          |          |          |          |          |          |          |          |          |          |          |          |          |          |          |
|-----------|----------|----------|----------|----------|----------|----------|----------|----------|----------|----------|----------|----------|----------|----------|----------|
| 1C.cr.s   | 0.179916 | 0.197379 | 0.039103 | 0.035566 | 0.021572 | 0.030306 | 0.189620 | 0.197716 | 0.030587 | 0.045425 | 0.054980 | 0.027062 | 0.197238 | 0.203140 | 0.058975 |
| 2A.cr.r.s | 0.099012 | 0.087515 | 0.212013 | 0.204718 | 0.215942 | 0.204205 | 0.067962 | 0.069406 | 0.243987 | 0.227412 | 0.213995 | 0.237515 | 0.088298 | 0.096358 | 0.221149 |
| 2A.cr.s   | 0.105025 | 0.091559 | 0.225732 | 0.218217 | 0.229317 | 0.217115 | 0.070683 | 0.071761 | 0.258494 | 0.241098 | 0.226670 | 0.252477 | 0.088814 | 0.096501 | 0.236393 |
| 2B.cr.r.s | 0.174433 | 0.191549 | 0.034571 | 0.027506 | 0.021758 | 0.033580 | 0.184297 | 0.192168 | 0.028805 | 0.041640 | 0.054492 | 0.025368 | 0.189134 | 0.195356 | 0.052896 |
| 2B.cr.s   | 0.173412 | 0.191517 | 0.032906 | 0.026909 | 0.020562 | 0.031602 | 0.186197 | 0.195014 | 0.024068 | 0.036306 | 0.050092 | 0.022053 | 0.189552 | 0.188344 | 0.047359 |
| 2C.cr.r.s | 0.169102 | 0.182737 | 0.036159 | 0.037052 | 0.020783 | 0.026630 | 0.172701 | 0.179272 | 0.033491 | 0.046766 | 0.051261 | 0.029475 | 0.179569 | 0.178077 | 0.057917 |
| 2C.cr.s   | 0.175681 | 0.190348 | 0.036512 | 0.037502 | 0.021666 | 0.028649 | 0.182109 | 0.188673 | 0.032837 | 0.047233 | 0.052172 | 0.028941 | 0.187394 | 0.185491 | 0.057839 |
| 3A.r.s    | 0.040213 | 0.040515 | 0.127406 | 0.122748 | 0.144321 | 0.133604 | 0.065315 | 0.072184 | 0.165780 | 0.152100 | 0.145956 | 0.160306 | 0.049354 | 0.052282 | 0.128284 |
| 3A.s      | 0.040335 | 0.041040 | 0.128077 | 0.123349 | 0.140431 | 0.129591 | 0.060065 | 0.067141 | 0.162801 | 0.149172 | 0.143735 | 0.158149 | 0.046013 | 0.051998 | 0.127867 |
| 3B.r.s    | 0.149941 | 0.171141 | 0.059033 | 0.045471 | 0.056956 | 0.070459 | 0.175694 | 0.185415 | 0.043954 | 0.044253 | 0.066603 | 0.048074 | 0.158164 | 0.161313 | 0.057025 |
| 3B.s      | 0.124560 | 0.139345 | 0.121972 | 0.118440 | 0.140602 | 0.138550 | 0.152255 | 0.160347 | 0.129838 | 0.124769 | 0.122748 | 0.133202 | 0.122336 | 0.119812 | 0.112203 |
| 3C.r.s    | 0.178020 | 0.196009 | 0.033258 | 0.035872 | 0.022123 | 0.023531 | 0.190303 | 0.199362 | 0.022883 | 0.037611 | 0.038935 | 0.025147 | 0.189272 | 0.195512 | 0.050933 |
| 3C.s      | 0.134025 | 0.148601 | 0.082416 | 0.077993 | 0.070301 | 0.066380 | 0.144262 | 0.154080 | 0.060702 | 0.046730 | 0.060705 | 0.072831 | 0.138183 | 0.144956 | 0.074644 |
| 4A.r.s    | 0.047118 | 0.043704 | 0.165438 | 0.158962 | 0.175616 | 0.162873 | 0.050441 | 0.047665 | 0.203188 | 0.187510 | 0.179317 | 0.196480 | 0.063671 | 0.069382 | 0.174161 |
| 4A.s      | 0.047964 | 0.044215 | 0.165677 | 0.159284 | 0.175825 | 0.162917 | 0.049511 | 0.046839 | 0.203657 | 0.188003 | 0.179024 | 0.196848 | 0.058456 | 0.064876 | 0.173292 |
| 4B.r.s    | 0.159776 | 0.179824 | 0.022986 | 0.026647 | 0.026778 | 0.028994 | 0.180127 | 0.187759 | 0.030030 | 0.049944 | 0.044871 | 0.027241 | 0.176013 | 0.180588 | 0.040136 |
| 4B.s      | 0.162144 | 0.182500 | 0.026453 | 0.029906 | 0.030111 | 0.032570 | 0.183076 | 0.190899 | 0.032989 | 0.051736 | 0.048098 | 0.029225 | 0.176191 | 0.181353 | 0.044520 |
| 4C.r.s    | 0.185653 | 0.205011 | 0.035827 | 0.033482 | 0.019271 | 0.026015 | 0.199240 | 0.207971 | 0.020929 | 0.035595 | 0.043389 | 0.022125 | 0.201591 | 0.208056 | 0.053374 |
| 4C.s      | 0.142895 | 0.158037 | 0.082806 | 0.078825 | 0.070776 | 0.066347 | 0.150764 | 0.159642 | 0.062697 | 0.047638 | 0.058386 | 0.072903 | 0.150706 | 0.157787 | 0.076768 |
| 5A.r.s    | 0.047559 | 0.042193 | 0.169595 | 0.164051 | 0.180365 | 0.166213 | 0.045867 | 0.050965 | 0.207686 | 0.190711 | 0.183657 | 0.202965 | 0.045240 | 0.045056 | 0.171156 |
| 5A.s      | 0.045201 | 0.039626 | 0.177007 | 0.170553 | 0.184842 | 0.170007 | 0.042373 | 0.047623 | 0.214517 | 0.196277 | 0.190055 | 0.209523 | 0.046257 | 0.048383 | 0.179409 |
| 5B.r.s    | 0.187945 | 0.209167 | 0.033300 | 0.028223 | 0.021750 | 0.032302 | 0.205065 | 0.214911 | 0.018934 | 0.035001 | 0.045335 | 0.019359 | 0.202772 | 0.208438 | 0.046729 |
| 5B.s      | 0.189375 | 0.210462 | 0.037899 | 0.032636 | 0.024472 | 0.035870 | 0.207450 | 0.217077 | 0.023355 | 0.040496 | 0.054527 | 0.024353 | 0.205513 | 0.211777 | 0.052528 |
| 5C.r.s    | 0.144093 | 0.163224 | 0.042283 | 0.029948 | 0.033659 | 0.043669 | 0.164048 | 0.173315 | 0.021852 | 0.018516 | 0.038766 | 0.028332 | 0.157895 | 0.161673 | 0.041797 |
| 5C.s      | 0.112456 | 0.128036 | 0.061464 | 0.058165 | 0.066985 | 0.064418 | 0.132863 | 0.141018 | 0.055689 | 0.043038 | 0.048042 | 0.062265 | 0.120477 | 0.121625 | 0.051374 |
| 6A.r.s    | 0.042490 | 0.040708 | 0.148340 | 0.144513 | 0.161786 | 0.151174 | 0.060516 | 0.055817 | 0.185308 | 0.171391 | 0.165204 | 0.180058 | 0.056086 | 0.059084 | 0.153866 |
| 6A.s      | 0.039123 | 0.038955 | 0.153445 | 0.149170 | 0.170303 | 0.158665 | 0.066376 | 0.060889 | 0.191484 | 0.176959 | 0.171883 | 0.187113 | 0.047463 | 0.053347 | 0.157519 |
| 6B.r.s    | 0.127582 | 0.144614 | 0.039395 | 0.026196 | 0.032956 | 0.043833 | 0.145064 | 0.153009 | 0.026025 | 0.024211 | 0.045398 | 0.030193 | 0.139394 | 0.144499 | 0.041315 |
| 6B.s      | 0.085226 | 0.096308 | 0.070725 | 0.067873 | 0.080806 | 0.075567 | 0.097701 | 0.109743 | 0.077701 | 0.068527 | 0.066715 | 0.081188 | 0.087164 | 0.090408 | 0.061030 |
| 6C.r.s    | 0.171509 | 0.190757 | 0.056316 | 0.044662 | 0.037065 | 0.046785 | 0.185706 | 0.194633 | 0.023022 | 0.015570 | 0.040462 | 0.033227 | 0.183644 | 0.190464 | 0.052792 |
| 6C.s      | 0.201359 | 0.221744 | 0.037535 | 0.035806 | 0.022186 | 0.031192 | 0.217297 | 0.226054 | 0.021564 | 0.037875 | 0.046124 | 0.021932 | 0.217247 | 0.223473 | 0.053139 |
| 7A.r.s    | 0.067170 | 0.057651 | 0.178074 | 0.170315 | 0.182555 | 0.170096 | 0.041570 | 0.032352 | 0.210642 | 0.193969 | 0.186391 | 0.205078 | 0.075335 | 0.081941 | 0.189662 |
| 7A.s      | 0.069622 | 0.059830 | 0.186986 | 0.179127 | 0.189837 | 0.176044 | 0.040530 | 0.034424 | 0.220033 | 0.202594 | 0.194314 | 0.214138 | 0.076896 | 0.083268 | 0.199858 |
| 7B.r.s    | 0.157639 | 0.176314 | 0.016855 | 0.019972 | 0.019153 | 0.022160 | 0.170530 | 0.177538 | 0.023021 | 0.036657 | 0.030801 | 0.018729 | 0.173631 | 0.176557 | 0.032809 |
| 7B.s      | 0.169631 | 0.189095 | 0.026183 | 0.020499 | 0.019592 | 0.031233 | 0.185425 | 0.191176 | 0.020457 | 0.033024 | 0.042936 | 0.016751 | 0.188004 | 0.191997 | 0.040356 |
| 7C.r.s    | 0.162579 | 0.181846 | 0.027463 | 0.020906 | 0.021154 | 0.030801 | 0.179339 | 0.189545 | 0.010877 | 0.015469 | 0.030307 | 0.015628 | 0.174816 | 0.180038 | 0.031894 |

|          |          |          |          |          |          |          |          |          |          |          |          |          |          |          |          |
|----------|----------|----------|----------|----------|----------|----------|----------|----------|----------|----------|----------|----------|----------|----------|----------|
| 0.046180 | 0.038299 | 0.070644 | 0.261644 | 0.260262 | 0.022212 | 0.043530 | 0.055432 | 0.039098 | 0.237310 | 0.249303 | 0.182185 | 0.200178 | 0.254841 | 0.261366 | 0.222422 |
| 0.230555 | 0.194111 | 0.179828 | 0.062921 | 0.061176 | 0.261341 | 0.228857 | 0.156945 | 0.177747 | 0.063089 | 0.080162 | 0.096430 | 0.076051 | 0.097563 | 0.101687 | 0.060736 |
| 0.245841 | 0.206911 | 0.190644 | 0.056682 | 0.056969 | 0.276369 | 0.243070 | 0.166496 | 0.188071 | 0.065055 | 0.080991 | 0.104734 | 0.082337 | 0.088355 | 0.091583 | 0.059049 |
| 0.034800 | 0.039119 | 0.070533 | 0.255908 | 0.255087 | 0.016247 | 0.030988 | 0.053785 | 0.031746 | 0.233287 | 0.245227 | 0.168825 | 0.192797 | 0.248634 | 0.255979 | 0.217391 |
| 0.033575 | 0.038913 | 0.068593 | 0.258505 | 0.259024 | 0.017296 | 0.032198 | 0.054601 | 0.033935 | 0.232425 | 0.245473 | 0.168355 | 0.193290 | 0.252994 | 0.261042 | 0.220040 |
| 0.046623 | 0.035271 | 0.064209 | 0.239916 | 0.237805 | 0.029519 | 0.049327 | 0.048141 | 0.034337 | 0.216482 | 0.228273 | 0.166772 | 0.184346 | 0.231269 | 0.239067 | 0.197816 |
| 0.045422 | 0.037469 | 0.067362 | 0.251404 | 0.249119 | 0.027350 | 0.048394 | 0.051814 | 0.036260 | 0.226661 | 0.237612 | 0.173220 | 0.192555 | 0.240153 | 0.247521 | 0.209508 |
| 0.135702 | 0.130224 | 0.116126 | 0.097512 | 0.100672 | 0.182999 | 0.154458 | 0.110225 | 0.122259 | 0.060880 | 0.068316 | 0.047713 | 0.039477 | 0.145916 | 0.150557 | 0.093577 |
| 0.135884 | 0.127921 | 0.114807 | 0.088744 | 0.093215 | 0.179432 | 0.151475 | 0.106550 | 0.122065 | 0.057227 | 0.074588 | 0.052178 | 0.040259 | 0.136880 | 0.141448 | 0.085169 |
| 0.050061 | 0.077268 | 0.090696 | 0.239692 | 0.246383 | 0.052822 | 0.032657 | 0.077666 | 0.060641 | 0.215740 | 0.227999 | 0.157122 | 0.173812 | 0.250053 | 0.257085 | 0.203530 |
| 0.111954 | 0.142986 | 0.140280 | 0.189285 | 0.198530 | 0.151570 | 0.116746 | 0.125332 | 0.134515 | 0.171884 | 0.184252 | 0.139180 | 0.141444 | 0.209763 | 0.215518 | 0.163603 |
| 0.040293 | 0.036547 | 0.063405 | 0.262850 | 0.263745 | 0.028792 | 0.051182 | 0.057360 | 0.049330 | 0.240621 | 0.251906 | 0.181195 | 0.201024 | 0.260225 | 0.267635 | 0.223704 |
| 0.092019 | 0.077427 | 0.070868 | 0.199328 | 0.203413 | 0.097702 | 0.086281 | 0.091364 | 0.095206 | 0.181216 | 0.196793 | 0.137813 | 0.149888 | 0.216801 | 0.222163 | 0.173176 |
| 0.181920 | 0.156448 | 0.142761 | 0.063921 | 0.052617 | 0.221310 | 0.187365 | 0.125264 | 0.144998 | 0.045201 | 0.048446 | 0.051093 | 0.036520 | 0.125201 | 0.132624 | 0.065092 |
| 0.181471 | 0.156000 | 0.140512 | 0.059059 | 0.052065 | 0.222434 | 0.187342 | 0.125318 | 0.144527 | 0.046228 | 0.049648 | 0.054101 | 0.038997 | 0.125414 | 0.131890 | 0.062198 |
| 0.022631 | 0.038386 | 0.068923 | 0.253452 | 0.253459 | 0.026526 | 0.035820 | 0.045381 | 0.037851 | 0.227744 | 0.237170 | 0.165955 | 0.184531 | 0.256631 | 0.264927 | 0.215275 |
| 0.024234 | 0.041839 | 0.072715 | 0.255353 | 0.255520 | 0.028194 | 0.037970 | 0.048287 | 0.040572 | 0.231766 | 0.240457 | 0.170022 | 0.188136 | 0.258333 | 0.266829 | 0.217414 |
| 0.041848 | 0.036373 | 0.065332 | 0.271980 | 0.271588 | 0.021544 | 0.045375 | 0.060833 | 0.045625 | 0.247312 | 0.258584 | 0.187416 | 0.209021 | 0.266384 | 0.273762 | 0.233862 |
| 0.098114 | 0.073406 | 0.066897 | 0.205731 | 0.206541 | 0.096992 | 0.087646 | 0.094549 | 0.097234 | 0.182980 | 0.199639 | 0.143969 | 0.156534 | 0.220168 | 0.225527 | 0.178756 |
| 0.178445 | 0.163242 | 0.148894 | 0.054066 | 0.057427 | 0.228921 | 0.192453 | 0.124921 | 0.148637 | 0.038703 | 0.058259 | 0.060176 | 0.039432 | 0.115874 | 0.123944 | 0.054623 |
| 0.187737 | 0.165609 | 0.149415 | 0.048395 | 0.047520 | 0.235785 | 0.200250 | 0.126225 | 0.150419 | 0.034261 | 0.053835 | 0.058144 | 0.039070 | 0.114284 | 0.122525 | 0.049878 |
| 0.033798 | 0.042485 | 0.071724 | 0.280622 | 0.282581 | 0.016473 | 0.032071 | 0.061777 | 0.043940 | 0.255855 | 0.267942 | 0.190828 | 0.212664 | 0.276720 | 0.284025 | 0.240995 |
| 0.035067 | 0.046368 | 0.076939 | 0.282020 | 0.283816 | 0.018131 | 0.037825 | 0.064084 | 0.044919 | 0.258780 | 0.269127 | 0.192851 | 0.214235 | 0.277758 | 0.285272 | 0.244714 |
| 0.046298 | 0.051764 | 0.060200 | 0.232258 | 0.234746 | 0.041421 | 0.028352 | 0.068047 | 0.051751 | 0.204797 | 0.216041 | 0.146591 | 0.164402 | 0.241657 | 0.248976 | 0.198348 |
| 0.069269 | 0.069633 | 0.061241 | 0.189713 | 0.192116 | 0.090244 | 0.065720 | 0.081617 | 0.082790 | 0.161723 | 0.174822 | 0.115812 | 0.128154 | 0.209286 | 0.216193 | 0.161150 |
| 0.158105 | 0.148891 | 0.136909 | 0.085083 | 0.076835 | 0.203456 | 0.168466 | 0.123526 | 0.140427 | 0.058277 | 0.062627 | 0.052119 | 0.044346 | 0.135908 | 0.141903 | 0.083129 |
| 0.160966 | 0.154790 | 0.139521 | 0.085344 | 0.075999 | 0.210238 | 0.171881 | 0.131341 | 0.145068 | 0.059569 | 0.053480 | 0.053693 | 0.042484 | 0.136026 | 0.140910 | 0.088434 |
| 0.041257 | 0.049242 | 0.060127 | 0.210556 | 0.212142 | 0.040059 | 0.023768 | 0.056867 | 0.040197 | 0.185345 | 0.197090 | 0.130708 | 0.147364 | 0.223667 | 0.231738 | 0.178662 |
| 0.074074 | 0.077801 | 0.070119 | 0.146340 | 0.154743 | 0.108818 | 0.080786 | 0.073435 | 0.082433 | 0.119812 | 0.137266 | 0.087245 | 0.094299 | 0.178155 | 0.186422 | 0.124584 |
| 0.063910 | 0.056270 | 0.060069 | 0.255164 | 0.256921 | 0.047353 | 0.044338 | 0.085381 | 0.066890 | 0.230615 | 0.243173 | 0.172127 | 0.192702 | 0.254667 | 0.260872 | 0.220039 |
| 0.041703 | 0.041098 | 0.070205 | 0.292806 | 0.292877 | 0.019652 | 0.044870 | 0.068584 | 0.050022 | 0.268046 | 0.278352 | 0.202624 | 0.225932 | 0.282397 | 0.289298 | 0.254399 |
| 0.198868 | 0.163479 | 0.152690 | 0.050617 | 0.031655 | 0.228294 | 0.193102 | 0.130429 | 0.151620 | 0.048260 | 0.056942 | 0.074206 | 0.055713 | 0.109143 | 0.116374 | 0.049796 |
| 0.208676 | 0.170289 | 0.158189 | 0.049401 | 0.030735 | 0.237599 | 0.203220 | 0.135303 | 0.157972 | 0.049466 | 0.057641 | 0.077203 | 0.058767 | 0.107782 | 0.114668 | 0.051263 |
| 0.023188 | 0.027821 | 0.053157 | 0.243299 | 0.241971 | 0.023203 | 0.030283 | 0.041208 | 0.031760 | 0.217510 | 0.227273 | 0.156929 | 0.176547 | 0.237999 | 0.245838 | 0.204810 |
| 0.027021 | 0.035038 | 0.061938 | 0.258243 | 0.257070 | 0.016054 | 0.021822 | 0.048382 | 0.028650 | 0.233202 | 0.242341 | 0.169324 | 0.189398 | 0.251387 | 0.258633 | 0.220311 |
| 0.029588 | 0.038267 | 0.051457 | 0.252289 | 0.256436 | 0.026498 | 0.028767 | 0.061881 | 0.044442 | 0.223783 | 0.237427 | 0.159662 | 0.181396 | 0.250987 | 0.258763 | 0.212185 |









|        |          |          |          |          |          |          |          |          |          |          |          |          |          |          |          |
|--------|----------|----------|----------|----------|----------|----------|----------|----------|----------|----------|----------|----------|----------|----------|----------|
| 7C.s   | 0.137994 | 0.155993 | 0.036263 | 0.024491 | 0.039885 | 0.051867 | 0.158464 | 0.167455 | 0.028607 | 0.027404 | 0.044368 | 0.030620 | 0.151440 | 0.155347 | 0.029953 |
| 8A.r.s | 0.112887 | 0.099698 | 0.236377 | 0.227387 | 0.232707 | 0.218098 | 0.064199 | 0.066290 | 0.265531 | 0.247721 | 0.238244 | 0.262407 | 0.093766 | 0.099419 | 0.247366 |
| 8A.s   | 0.114977 | 0.101634 | 0.247173 | 0.238441 | 0.244098 | 0.229304 | 0.069346 | 0.069899 | 0.277300 | 0.258445 | 0.249114 | 0.274161 | 0.096989 | 0.102978 | 0.257399 |
| 8B.r.s | 0.180736 | 0.198567 | 0.027524 | 0.022100 | 0.015729 | 0.027871 | 0.191122 | 0.197585 | 0.013254 | 0.026048 | 0.033948 | 0.013295 | 0.197148 | 0.201862 | 0.042779 |
| 8B.s   | 0.158499 | 0.178335 | 0.037051 | 0.026653 | 0.029337 | 0.040568 | 0.169924 | 0.180346 | 0.022289 | 0.025332 | 0.041989 | 0.024211 | 0.171908 | 0.176856 | 0.035630 |
| 8C.r.s | 0.128457 | 0.142475 | 0.058141 | 0.054904 | 0.067525 | 0.064930 | 0.131007 | 0.137576 | 0.063981 | 0.055350 | 0.053457 | 0.061905 | 0.138388 | 0.146980 | 0.044143 |
| 8C.s   | 0.165474 | 0.184237 | 0.046605 | 0.039579 | 0.030075 | 0.037543 | 0.173762 | 0.183456 | 0.018267 | 0.011368 | 0.033372 | 0.025828 | 0.178776 | 0.186238 | 0.045056 |
| 9A.r.s | 0.045330 | 0.042254 | 0.166656 | 0.160655 | 0.176535 | 0.164045 | 0.052712 | 0.056922 | 0.205365 | 0.189571 | 0.181613 | 0.200308 | 0.050497 | 0.055959 | 0.172216 |
| 9A.s   | 0.051220 | 0.039420 | 0.164783 | 0.159864 | 0.174865 | 0.162763 | 0.053571 | 0.056590 | 0.203835 | 0.188375 | 0.179953 | 0.198007 | 0.047831 | 0.051506 | 0.171204 |
| 9B.r.s | 0.121481 | 0.136792 | 0.026977 | 0.019535 | 0.023258 | 0.029932 | 0.132573 | 0.142889 | 0.030062 | 0.031740 | 0.038779 | 0.026422 | 0.132458 | 0.138487 | 0.033647 |
| 9B.s   | 0.141545 | 0.158739 | 0.018217 | 0.013815 | 0.011414 | 0.017953 | 0.154479 | 0.165083 | 0.018646 | 0.026863 | 0.034483 | 0.016377 | 0.153960 | 0.159777 | 0.033038 |
| 9C.r.s | 0.147311 | 0.162610 | 0.033715 | 0.029943 | 0.014860 | 0.017780 | 0.149859 | 0.159933 | 0.018762 | 0.019424 | 0.028400 | 0.023429 | 0.155608 | 0.162392 | 0.041458 |
| 9C.s   | 0.173903 | 0.190696 | 0.025871 | 0.025851 | 0.009643 | 0.015199 | 0.181747 | 0.190732 | 0.016580 | 0.028367 | 0.034347 | 0.015961 | 0.186790 | 0.192858 | 0.042915 |

|          |          |          |          |          |          |          |          |          |          |          |          |          |          |          |          |
|----------|----------|----------|----------|----------|----------|----------|----------|----------|----------|----------|----------|----------|----------|----------|----------|
| 0.029055 | 0.052278 | 0.059783 | 0.228175 | 0.233626 | 0.038091 | 0.018697 | 0.063440 | 0.043848 | 0.195716 | 0.210328 | 0.133480 | 0.152749 | 0.232138 | 0.239167 | 0.193357 |
| 0.257766 | 0.208027 | 0.194145 | 0.046947 | 0.043799 | 0.285212 | 0.252255 | 0.161763 | 0.189417 | 0.066519 | 0.087310 | 0.115487 | 0.092449 | 0.088265 | 0.095895 | 0.052304 |
| 0.268061 | 0.217315 | 0.201660 | 0.046873 | 0.043931 | 0.296769 | 0.263040 | 0.171817 | 0.199925 | 0.066829 | 0.087266 | 0.117905 | 0.094592 | 0.091986 | 0.098992 | 0.054597 |
| 0.033711 | 0.033995 | 0.060566 | 0.265725 | 0.263580 | 0.011272 | 0.026354 | 0.059876 | 0.035450 | 0.241235 | 0.250699 | 0.176844 | 0.199564 | 0.252285 | 0.258729 | 0.225337 |
| 0.034684 | 0.045144 | 0.060884 | 0.239528 | 0.243269 | 0.027613 | 0.017182 | 0.055243 | 0.038704 | 0.217888 | 0.232465 | 0.158445 | 0.178792 | 0.246185 | 0.253891 | 0.204404 |
| 0.060837 | 0.057717 | 0.052846 | 0.187746 | 0.189132 | 0.078738 | 0.054892 | 0.059151 | 0.059767 | 0.171609 | 0.187656 | 0.125347 | 0.137832 | 0.199114 | 0.204229 | 0.154436 |
| 0.054500 | 0.044603 | 0.047996 | 0.242628 | 0.243569 | 0.042608 | 0.042488 | 0.069964 | 0.055239 | 0.222690 | 0.235761 | 0.163920 | 0.184398 | 0.243090 | 0.249958 | 0.205304 |
| 0.180370 | 0.157911 | 0.143507 | 0.058160 | 0.059672 | 0.224229 | 0.192456 | 0.127790 | 0.146590 | 0.034979 | 0.052992 | 0.055974 | 0.041089 | 0.120384 | 0.127768 | 0.059185 |
| 0.177242 | 0.158411 | 0.145291 | 0.066334 | 0.064514 | 0.220956 | 0.191326 | 0.130472 | 0.148408 | 0.038354 | 0.054569 | 0.059189 | 0.040419 | 0.117272 | 0.122703 | 0.063924 |
| 0.032730 | 0.034816 | 0.048201 | 0.197935 | 0.200441 | 0.034722 | 0.022262 | 0.039018 | 0.027543 | 0.170291 | 0.185145 | 0.118397 | 0.136952 | 0.213302 | 0.221739 | 0.163614 |
| 0.025422 | 0.027016 | 0.047907 | 0.224264 | 0.226462 | 0.022889 | 0.026047 | 0.038166 | 0.025947 | 0.197629 | 0.211016 | 0.140827 | 0.160298 | 0.232945 | 0.241547 | 0.187725 |
| 0.049162 | 0.030067 | 0.040615 | 0.215378 | 0.217413 | 0.037648 | 0.038451 | 0.048862 | 0.040403 | 0.195161 | 0.208853 | 0.146105 | 0.161560 | 0.224112 | 0.231878 | 0.178706 |
| 0.037008 | 0.025930 | 0.051042 | 0.254030 | 0.254154 | 0.019200 | 0.037915 | 0.048568 | 0.034424 | 0.231206 | 0.242522 | 0.173288 | 0.192479 | 0.250272 | 0.257097 | 0.215764 |



|          |          |          |          |          |          |          |          |          |          |          |          |          |          |          |          |
|----------|----------|----------|----------|----------|----------|----------|----------|----------|----------|----------|----------|----------|----------|----------|----------|
| 0.211502 | 0.047896 | 0.125299 | 0.053728 | 0.056110 | 0.219731 | 0.234403 | 0.043353 | 0.041557 | 0.063442 | 0.062479 | 0.128991 | 0.127972 | 0.024132 | 0.095660 | 0.060453 |
| 0.066510 | 0.276492 | 0.134833 | 0.285484 | 0.271897 | 0.052648 | 0.044384 | 0.270336 | 0.273854 | 0.247538 | 0.259559 | 0.114421 | 0.106177 | 0.261619 | 0.208431 | 0.276575 |
| 0.066254 | 0.288962 | 0.141280 | 0.297072 | 0.284024 | 0.054880 | 0.045734 | 0.281487 | 0.285519 | 0.258868 | 0.270928 | 0.119557 | 0.110001 | 0.271361 | 0.213544 | 0.288712 |
| 0.241326 | 0.010916 | 0.155025 | 0.014511 | 0.014748 | 0.255162 | 0.270027 | 0.012292 | 0.011265 | 0.019449 | 0.017704 | 0.179259 | 0.175988 | 0.051644 | 0.152098 | 0.017889 |
| 0.225659 | 0.033240 | 0.141776 | 0.034367 | 0.037704 | 0.237518 | 0.251514 | 0.031113 | 0.030507 | 0.048926 | 0.048071 | 0.154867 | 0.151380 | 0.027336 | 0.117034 | 0.047446 |
| 0.168678 | 0.096530 | 0.110255 | 0.101006 | 0.096919 | 0.180500 | 0.190025 | 0.089763 | 0.091590 | 0.098153 | 0.100856 | 0.124794 | 0.121738 | 0.088129 | 0.121735 | 0.096121 |
| 0.223410 | 0.048808 | 0.129205 | 0.055669 | 0.047454 | 0.235507 | 0.248420 | 0.050207 | 0.044892 | 0.049142 | 0.049609 | 0.163835 | 0.160468 | 0.058533 | 0.135898 | 0.033277 |
| 0.072052 | 0.215424 | 0.090088 | 0.229623 | 0.213186 | 0.061226 | 0.072111 | 0.209222 | 0.209112 | 0.196898 | 0.206808 | 0.039273 | 0.038258 | 0.188539 | 0.149031 | 0.216233 |
| 0.076897 | 0.210581 | 0.089999 | 0.224604 | 0.208680 | 0.067459 | 0.078520 | 0.205882 | 0.205328 | 0.192094 | 0.201672 | 0.039890 | 0.039789 | 0.188225 | 0.151485 | 0.210786 |
| 0.186055 | 0.037687 | 0.116502 | 0.041176 | 0.040396 | 0.191947 | 0.208620 | 0.032399 | 0.033321 | 0.046541 | 0.047520 | 0.114799 | 0.112569 | 0.031703 | 0.104388 | 0.049047 |
| 0.209979 | 0.018640 | 0.128171 | 0.023358 | 0.021651 | 0.217379 | 0.233605 | 0.018451 | 0.016587 | 0.026507 | 0.026393 | 0.136008 | 0.133793 | 0.035633 | 0.116473 | 0.024493 |
| 0.199904 | 0.036732 | 0.114960 | 0.040881 | 0.033545 | 0.210819 | 0.223950 | 0.039927 | 0.035884 | 0.032662 | 0.034834 | 0.142110 | 0.137816 | 0.055665 | 0.132189 | 0.025844 |
| 0.235146 | 0.014272 | 0.146169 | 0.016094 | 0.012911 | 0.246515 | 0.261060 | 0.018096 | 0.016302 | 0.015521 | 0.015107 | 0.171321 | 0.167326 | 0.059929 | 0.152240 | 0.011157 |

|          |          |          |          |          |          |          |          |          |          |          |          |          |          |          |          |
|----------|----------|----------|----------|----------|----------|----------|----------|----------|----------|----------|----------|----------|----------|----------|----------|
| 0.081281 | 0.175029 | 0.175409 | 0.039215 | 0.043039 | 0.055906 | 0.084694 | 0.170324 | 0.177953 | 0.038538 | 0.044022 | 0.021040 | 0.052123 | 0.151438 | 0.154356 | 0.018834 |
| 0.214471 | 0.073240 | 0.072462 | 0.274443 | 0.276047 | 0.285353 | 0.220575 | 0.065538 | 0.054436 | 0.297388 | 0.299383 | 0.250170 | 0.209863 | 0.102470 | 0.106118 | 0.229303 |
| 0.223755 | 0.074320 | 0.073585 | 0.285512 | 0.287194 | 0.297395 | 0.228202 | 0.068221 | 0.055420 | 0.309590 | 0.311642 | 0.260976 | 0.217681 | 0.105673 | 0.107906 | 0.239732 |
| 0.084398 | 0.215147 | 0.216289 | 0.024127 | 0.025123 | 0.011004 | 0.083103 | 0.224508 | 0.230109 | 0.010725 | 0.012007 | 0.031576 | 0.080794 | 0.197599 | 0.205512 | 0.033596 |
| 0.082258 | 0.193586 | 0.193728 | 0.032628 | 0.036647 | 0.040779 | 0.080507 | 0.194539 | 0.201079 | 0.026254 | 0.031569 | 0.019489 | 0.064287 | 0.175201 | 0.180928 | 0.019514 |
| 0.085270 | 0.149962 | 0.148071 | 0.081406 | 0.086095 | 0.099060 | 0.078164 | 0.153052 | 0.154618 | 0.092580 | 0.102158 | 0.070734 | 0.061315 | 0.142151 | 0.145866 | 0.068456 |
| 0.039235 | 0.197852 | 0.197942 | 0.057414 | 0.057183 | 0.031378 | 0.038540 | 0.204695 | 0.208374 | 0.040108 | 0.043692 | 0.026964 | 0.047886 | 0.183626 | 0.189544 | 0.036673 |
| 0.159993 | 0.030661 | 0.032537 | 0.201195 | 0.204144 | 0.224852 | 0.167300 | 0.021746 | 0.022324 | 0.230286 | 0.231705 | 0.181488 | 0.141122 | 0.041736 | 0.045737 | 0.160766 |
| 0.154711 | 0.034165 | 0.037556 | 0.198964 | 0.202109 | 0.220909 | 0.163632 | 0.023803 | 0.026564 | 0.226730 | 0.228695 | 0.179461 | 0.141320 | 0.041003 | 0.048414 | 0.158364 |
| 0.078811 | 0.146587 | 0.147950 | 0.033519 | 0.038355 | 0.046466 | 0.081309 | 0.147143 | 0.154062 | 0.034824 | 0.041816 | 0.026116 | 0.058266 | 0.134891 | 0.141683 | 0.018747 |
| 0.075425 | 0.172707 | 0.173695 | 0.016883 | 0.020052 | 0.022436 | 0.079124 | 0.174127 | 0.181510 | 0.015127 | 0.017850 | 0.022088 | 0.061363 | 0.156580 | 0.162896 | 0.020868 |
| 0.043380 | 0.173444 | 0.173862 | 0.041949 | 0.046068 | 0.025721 | 0.042988 | 0.176565 | 0.182002 | 0.031794 | 0.036877 | 0.024635 | 0.050000 | 0.162376 | 0.168940 | 0.031450 |
| 0.069964 | 0.207093 | 0.208135 | 0.023570 | 0.026175 | 0.007609 | 0.068494 | 0.214379 | 0.220455 | 0.013294 | 0.015078 | 0.033604 | 0.073690 | 0.192247 | 0.199780 | 0.039815 |





|         | 10A.r.s  | 10A.s    | 10B.r.s  | 10B.s    | 10C.r.s  | 10C.s    | 11A.r.s  | 11A.s    | 11B.r.s  | 11B.s    | 11C.r.s  | 11C.s    | 12A.r.s  | 12A.s    | 12B.r.s  |
|---------|----------|----------|----------|----------|----------|----------|----------|----------|----------|----------|----------|----------|----------|----------|----------|
| 10A.r.s |          |          |          |          |          |          |          |          |          |          |          |          |          |          |          |
| 10A.s   | 0.013333 |          |          |          |          |          |          |          |          |          |          |          |          |          |          |
| 10B.r.s | 0.134235 | 0.148236 |          |          |          |          |          |          |          |          |          |          |          |          |          |
| 10B.s   | 0.129259 | 0.143160 | 0.007575 |          |          |          |          |          |          |          |          |          |          |          |          |
| 10C.r.s | 0.146993 | 0.162163 | 0.017643 | 0.017368 |          |          |          |          |          |          |          |          |          |          |          |
| 10C.s   | 0.136735 | 0.151519 | 0.018238 | 0.024589 | 0.006099 |          |          |          |          |          |          |          |          |          |          |
| 11A.r.s | 0.063784 | 0.060732 | 0.147008 | 0.142266 | 0.150356 | 0.138959 |          |          |          |          |          |          |          |          |          |
| 11A.s   | 0.064863 | 0.056976 | 0.154611 | 0.148788 | 0.159889 | 0.149428 | 0.014060 |          |          |          |          |          |          |          |          |
| 11B.r.s | 0.169007 | 0.187949 | 0.026503 | 0.019840 | 0.018173 | 0.028052 | 0.177775 | 0.186713 |          |          |          |          |          |          |          |
| 11B.s   | 0.156508 | 0.174350 | 0.036214 | 0.026793 | 0.025471 | 0.035527 | 0.163262 | 0.172253 | 0.011414 |          |          |          |          |          |          |
| 11C.r.s | 0.150190 | 0.165677 | 0.023109 | 0.026268 | 0.028589 | 0.029933 | 0.155535 | 0.163134 | 0.022007 | 0.027171 |          |          |          |          |          |
| 11C.s   | 0.163682 | 0.181595 | 0.019198 | 0.016008 | 0.014572 | 0.023464 | 0.173238 | 0.180944 | 0.009067 | 0.018375 | 0.014450 |          |          |          |          |
| 12A.r.s | 0.055456 | 0.048624 | 0.142590 | 0.139118 | 0.157831 | 0.146774 | 0.067461 | 0.071746 | 0.182595 | 0.168858 | 0.159088 | 0.177197 |          |          |          |
| 12A.s   | 0.059913 | 0.053378 | 0.149597 | 0.145653 | 0.164683 | 0.153031 | 0.074504 | 0.078123 | 0.187936 | 0.174160 | 0.164210 | 0.181442 | 0.016025 |          |          |
| 12B.r.s | 0.135489 | 0.155108 | 0.022486 | 0.026502 | 0.032913 | 0.034129 | 0.156152 | 0.167094 | 0.028716 | 0.033265 | 0.025249 | 0.024179 | 0.150094 | 0.151513 |          |
| 12B.s   | 0.142955 | 0.161055 | 0.019255 | 0.022201 | 0.030957 | 0.033859 | 0.165499 | 0.175497 | 0.028773 | 0.043859 | 0.036535 | 0.024350 | 0.154739 | 0.157356 | 0.013167 |
| 12C.r.s | 0.133540 | 0.148612 | 0.022421 | 0.027261 | 0.017057 | 0.015217 | 0.132612 | 0.143581 | 0.035591 | 0.041035 | 0.033490 | 0.027121 | 0.144115 | 0.150617 | 0.032685 |
| 12C.s   | 0.119953 | 0.134002 | 0.037807 | 0.041512 | 0.035751 | 0.033465 | 0.119928 | 0.131091 | 0.050592 | 0.043987 | 0.037359 | 0.042317 | 0.129868 | 0.137040 | 0.035909 |
| 13A.r.s | 0.089861 | 0.079247 | 0.219862 | 0.212412 | 0.219202 | 0.204880 | 0.064764 | 0.069502 | 0.251400 | 0.233744 | 0.224989 | 0.247527 | 0.080065 | 0.088353 | 0.227118 |
| 13A.s   | 0.087340 | 0.075003 | 0.220962 | 0.213111 | 0.221505 | 0.205824 | 0.060297 | 0.051278 | 0.252599 | 0.234882 | 0.226408 | 0.247861 | 0.086924 | 0.092869 | 0.233062 |
| 13B.r.s | 0.184558 | 0.203435 | 0.029366 | 0.025144 | 0.022645 | 0.034156 | 0.194854 | 0.202504 | 0.016870 | 0.035565 | 0.035615 | 0.015132 | 0.199382 | 0.205251 | 0.032905 |
| 13B.s   | 0.154227 | 0.172375 | 0.032442 | 0.022521 | 0.032910 | 0.046207 | 0.165538 | 0.168058 | 0.022078 | 0.026062 | 0.034620 | 0.021355 | 0.168237 | 0.173936 | 0.033354 |
| 13C.r.s | 0.112465 | 0.123689 | 0.040120 | 0.042464 | 0.036204 | 0.030354 | 0.104568 | 0.115161 | 0.057902 | 0.065901 | 0.058792 | 0.049422 | 0.116753 | 0.121158 | 0.049998 |
| 13C.s   | 0.123672 | 0.136564 | 0.028972 | 0.024625 | 0.023472 | 0.029038 | 0.125131 | 0.133397 | 0.037691 | 0.048098 | 0.046785 | 0.031290 | 0.131420 | 0.136236 | 0.041091 |
| 14A.r.s | 0.063734 | 0.054982 | 0.189636 | 0.183578 | 0.198375 | 0.185122 | 0.059369 | 0.063497 | 0.228960 | 0.211256 | 0.202587 | 0.223371 | 0.064465 | 0.064852 | 0.195155 |
| 14A.s   | 0.064999 | 0.054945 | 0.198710 | 0.193411 | 0.210859 | 0.198358 | 0.077113 | 0.069015 | 0.241231 | 0.224456 | 0.213151 | 0.232614 | 0.067303 | 0.070076 | 0.209567 |
| 3A.r.s  | 0.040213 | 0.040515 | 0.127406 | 0.122748 | 0.144321 | 0.133604 | 0.065315 | 0.072184 | 0.165780 | 0.152100 | 0.145956 | 0.160306 | 0.049354 | 0.052282 | 0.128284 |
| 3A.s    | 0.040335 | 0.041040 | 0.128077 | 0.123349 | 0.140431 | 0.129591 | 0.060065 | 0.067141 | 0.162801 | 0.149172 | 0.143735 | 0.158149 | 0.046013 | 0.051998 | 0.127867 |
| 3B.r.s  | 0.149941 | 0.171141 | 0.059033 | 0.045471 | 0.056956 | 0.070459 | 0.175694 | 0.185415 | 0.043954 | 0.044253 | 0.066603 | 0.048074 | 0.158164 | 0.161313 | 0.057025 |
| 3B.s    | 0.124560 | 0.139345 | 0.121972 | 0.118440 | 0.140602 | 0.138550 | 0.152255 | 0.160347 | 0.129838 | 0.124769 | 0.122748 | 0.133202 | 0.122336 | 0.119812 | 0.112203 |
| 3C.r.s  | 0.178020 | 0.196009 | 0.033258 | 0.035872 | 0.022123 | 0.023531 | 0.190303 | 0.199362 | 0.022883 | 0.037611 | 0.038935 | 0.025147 | 0.189272 | 0.195512 | 0.050933 |
| 3C.s    | 0.134025 | 0.148601 | 0.082416 | 0.077993 | 0.070301 | 0.066380 | 0.144262 | 0.154080 | 0.060702 | 0.046730 | 0.060705 | 0.072831 | 0.138183 | 0.144956 | 0.074644 |
| 4A.r.s  | 0.047118 | 0.043704 | 0.165438 | 0.158962 | 0.175616 | 0.162873 | 0.050441 | 0.047665 | 0.203188 | 0.187510 | 0.179317 | 0.196480 | 0.063671 | 0.069382 | 0.174161 |
| 4A.s    | 0.047964 | 0.044215 | 0.165677 | 0.159284 | 0.175825 | 0.162917 | 0.049511 | 0.046839 | 0.203657 | 0.188003 | 0.179024 | 0.196848 | 0.058456 | 0.064876 | 0.173292 |
| 4B.r.s  | 0.159776 | 0.179824 | 0.022986 | 0.026647 | 0.026778 | 0.028994 | 0.180127 | 0.187759 | 0.030030 | 0.049944 | 0.044871 | 0.027241 | 0.176013 | 0.180588 | 0.040136 |











|        |          |          |          |          |          |          |          |          |          |          |          |          |          |          |          |
|--------|----------|----------|----------|----------|----------|----------|----------|----------|----------|----------|----------|----------|----------|----------|----------|
| 4B.s   | 0.162144 | 0.182500 | 0.026453 | 0.029906 | 0.030111 | 0.032570 | 0.183076 | 0.190899 | 0.032989 | 0.051736 | 0.048098 | 0.029225 | 0.176191 | 0.181353 | 0.044520 |
| 4C.r.s | 0.185653 | 0.205011 | 0.035827 | 0.033482 | 0.019271 | 0.026015 | 0.199240 | 0.207971 | 0.020929 | 0.035595 | 0.043389 | 0.022125 | 0.201591 | 0.208056 | 0.053374 |
| 4C.s   | 0.142895 | 0.158037 | 0.082806 | 0.078825 | 0.070776 | 0.066347 | 0.150764 | 0.159642 | 0.062697 | 0.047638 | 0.058386 | 0.072903 | 0.150706 | 0.157787 | 0.076768 |
| 5A.r.s | 0.047559 | 0.042193 | 0.169595 | 0.164051 | 0.180365 | 0.166213 | 0.045867 | 0.050965 | 0.207686 | 0.190711 | 0.183657 | 0.202965 | 0.045240 | 0.045056 | 0.171156 |
| 5A.s   | 0.045201 | 0.039626 | 0.177007 | 0.170553 | 0.184842 | 0.170007 | 0.042373 | 0.047623 | 0.214517 | 0.196277 | 0.190055 | 0.209523 | 0.046257 | 0.048383 | 0.179409 |
| 5B.r.s | 0.187945 | 0.209167 | 0.033300 | 0.028223 | 0.021750 | 0.032302 | 0.205065 | 0.214911 | 0.018934 | 0.035001 | 0.045335 | 0.019359 | 0.202772 | 0.208438 | 0.046729 |
| 5B.s   | 0.189375 | 0.210462 | 0.037899 | 0.032636 | 0.024472 | 0.035870 | 0.207450 | 0.217077 | 0.023355 | 0.040496 | 0.054527 | 0.024353 | 0.205513 | 0.211777 | 0.052528 |
| 5C.r.s | 0.144093 | 0.163224 | 0.042283 | 0.029948 | 0.033659 | 0.043669 | 0.164048 | 0.173315 | 0.021852 | 0.018516 | 0.038766 | 0.028332 | 0.157895 | 0.161673 | 0.041797 |
| 5C.s   | 0.112456 | 0.128036 | 0.061464 | 0.058165 | 0.066985 | 0.064418 | 0.132863 | 0.141018 | 0.055689 | 0.043038 | 0.048042 | 0.062265 | 0.120477 | 0.121625 | 0.051374 |
| 6A.r.s | 0.042490 | 0.040708 | 0.148340 | 0.144513 | 0.161786 | 0.151174 | 0.060516 | 0.055817 | 0.185308 | 0.171391 | 0.165204 | 0.180058 | 0.056086 | 0.059084 | 0.153866 |
| 6A.s   | 0.039123 | 0.038955 | 0.153445 | 0.149170 | 0.170303 | 0.158665 | 0.066376 | 0.060889 | 0.191484 | 0.176959 | 0.171883 | 0.187113 | 0.047463 | 0.053347 | 0.157519 |
| 6B.r.s | 0.127582 | 0.144614 | 0.039395 | 0.026196 | 0.032956 | 0.043833 | 0.145064 | 0.153009 | 0.026025 | 0.024211 | 0.045398 | 0.030193 | 0.139394 | 0.144499 | 0.041315 |
| 6B.s   | 0.085226 | 0.096308 | 0.070725 | 0.067873 | 0.080806 | 0.075567 | 0.097701 | 0.109743 | 0.077701 | 0.068527 | 0.066715 | 0.081188 | 0.087164 | 0.090408 | 0.061030 |
| 6C.r.s | 0.171509 | 0.190757 | 0.056316 | 0.044662 | 0.037065 | 0.046785 | 0.185706 | 0.194633 | 0.023022 | 0.015570 | 0.040462 | 0.033227 | 0.183644 | 0.190464 | 0.052792 |
| 6C.s   | 0.201359 | 0.221744 | 0.037535 | 0.035806 | 0.022186 | 0.031192 | 0.217297 | 0.226054 | 0.021564 | 0.037875 | 0.046124 | 0.021932 | 0.217247 | 0.223473 | 0.053139 |
| 7A.r.s | 0.067170 | 0.057651 | 0.178074 | 0.170315 | 0.182555 | 0.170096 | 0.041570 | 0.032352 | 0.210642 | 0.193969 | 0.186391 | 0.205078 | 0.075335 | 0.081941 | 0.189662 |
| 7A.s   | 0.069622 | 0.059830 | 0.186986 | 0.179127 | 0.189837 | 0.176044 | 0.040530 | 0.034424 | 0.220033 | 0.202594 | 0.194314 | 0.214138 | 0.076896 | 0.083268 | 0.199858 |
| 7B.r.s | 0.157639 | 0.176314 | 0.016855 | 0.019972 | 0.019153 | 0.022160 | 0.170530 | 0.177538 | 0.023021 | 0.036657 | 0.030801 | 0.018729 | 0.173631 | 0.176557 | 0.032809 |
| 7B.s   | 0.169631 | 0.189095 | 0.026183 | 0.020499 | 0.019592 | 0.031233 | 0.185425 | 0.191176 | 0.020457 | 0.033024 | 0.042936 | 0.016751 | 0.188004 | 0.191997 | 0.040356 |
| 7C.r.s | 0.162579 | 0.181846 | 0.027463 | 0.020906 | 0.021154 | 0.030801 | 0.179339 | 0.189545 | 0.010877 | 0.015469 | 0.030307 | 0.015628 | 0.174816 | 0.180038 | 0.031894 |
| 7C.s   | 0.137994 | 0.155993 | 0.036263 | 0.024491 | 0.039885 | 0.051867 | 0.158464 | 0.167455 | 0.028607 | 0.027404 | 0.044368 | 0.030620 | 0.151440 | 0.155347 | 0.029953 |
| 8A.r.s | 0.112887 | 0.099698 | 0.236377 | 0.227387 | 0.232707 | 0.218098 | 0.064199 | 0.066290 | 0.265531 | 0.247721 | 0.238244 | 0.262407 | 0.093766 | 0.099419 | 0.247366 |
| 8A.s   | 0.114977 | 0.101634 | 0.247173 | 0.238441 | 0.244098 | 0.229304 | 0.069346 | 0.069899 | 0.277300 | 0.258445 | 0.249114 | 0.274161 | 0.096989 | 0.102978 | 0.257399 |
| 8B.r.s | 0.180736 | 0.198567 | 0.027524 | 0.022100 | 0.015729 | 0.027871 | 0.191122 | 0.197585 | 0.013254 | 0.026048 | 0.033948 | 0.013295 | 0.197148 | 0.201862 | 0.042779 |
| 8B.s   | 0.158499 | 0.178335 | 0.037051 | 0.026653 | 0.029337 | 0.040568 | 0.169924 | 0.180346 | 0.022289 | 0.025332 | 0.041989 | 0.024211 | 0.171908 | 0.176856 | 0.035630 |
| 8C.r.s | 0.128457 | 0.142475 | 0.058141 | 0.054904 | 0.067525 | 0.064930 | 0.131007 | 0.137576 | 0.063981 | 0.055350 | 0.053457 | 0.061905 | 0.138388 | 0.146980 | 0.044143 |
| 8C.s   | 0.165474 | 0.184237 | 0.046605 | 0.039579 | 0.030075 | 0.037543 | 0.173762 | 0.183456 | 0.018267 | 0.011368 | 0.033372 | 0.025828 | 0.178776 | 0.186238 | 0.045056 |
| 9A.r.s | 0.045330 | 0.042254 | 0.166656 | 0.160655 | 0.176535 | 0.164045 | 0.052712 | 0.056922 | 0.205365 | 0.189571 | 0.181613 | 0.200308 | 0.050497 | 0.055959 | 0.172216 |
| 9A.s   | 0.051220 | 0.039420 | 0.164783 | 0.159864 | 0.174865 | 0.162763 | 0.053571 | 0.056590 | 0.203835 | 0.188375 | 0.179953 | 0.198007 | 0.047831 | 0.051506 | 0.171204 |
| 9B.r.s | 0.121481 | 0.136792 | 0.026977 | 0.019535 | 0.023258 | 0.029932 | 0.132573 | 0.142889 | 0.030062 | 0.031740 | 0.038779 | 0.026422 | 0.132458 | 0.138487 | 0.033647 |
| 9B.s   | 0.141545 | 0.158739 | 0.018217 | 0.013815 | 0.011414 | 0.017953 | 0.154479 | 0.165083 | 0.018646 | 0.026863 | 0.034483 | 0.016377 | 0.153960 | 0.159777 | 0.033038 |
| 9C.r.s | 0.147311 | 0.162610 | 0.033715 | 0.029943 | 0.014860 | 0.017780 | 0.149859 | 0.159933 | 0.018762 | 0.019424 | 0.028400 | 0.023429 | 0.155608 | 0.162392 | 0.041458 |
| 9C.s   | 0.173903 | 0.190696 | 0.025871 | 0.025851 | 0.009643 | 0.015199 | 0.181747 | 0.190732 | 0.016580 | 0.028367 | 0.034347 | 0.015961 | 0.186790 | 0.192858 | 0.042915 |

|          |          |          |          |          |          |          |          |          |          |          |          |          |          |          |          |
|----------|----------|----------|----------|----------|----------|----------|----------|----------|----------|----------|----------|----------|----------|----------|----------|
| 0.024234 | 0.041839 | 0.072715 | 0.255353 | 0.255520 | 0.028194 | 0.037970 | 0.048287 | 0.040572 | 0.231766 | 0.240457 | 0.161116 | 0.158715 | 0.040760 | 0.108465 | 0.020099 |
| 0.041848 | 0.036373 | 0.065332 | 0.271980 | 0.271588 | 0.021544 | 0.045375 | 0.060833 | 0.045625 | 0.247312 | 0.258584 | 0.184697 | 0.180724 | 0.059323 | 0.154123 | 0.006423 |
| 0.098114 | 0.073406 | 0.066897 | 0.205731 | 0.206541 | 0.096992 | 0.087646 | 0.094549 | 0.097234 | 0.182980 | 0.199639 | 0.138959 | 0.133535 | 0.096975 | 0.132486 | 0.064843 |
| 0.178445 | 0.163242 | 0.148894 | 0.054066 | 0.057427 | 0.228921 | 0.192453 | 0.124921 | 0.148637 | 0.038703 | 0.058259 | 0.038914 | 0.036902 | 0.181793 | 0.130381 | 0.218685 |
| 0.187737 | 0.165609 | 0.149415 | 0.048395 | 0.047520 | 0.235785 | 0.200250 | 0.126225 | 0.150419 | 0.034261 | 0.053835 | 0.044941 | 0.042300 | 0.193314 | 0.145250 | 0.225501 |
| 0.033798 | 0.042485 | 0.071724 | 0.280622 | 0.282581 | 0.016473 | 0.032071 | 0.061777 | 0.043940 | 0.255855 | 0.267942 | 0.184162 | 0.180894 | 0.038826 | 0.135875 | 0.014735 |
| 0.035067 | 0.046368 | 0.076939 | 0.282020 | 0.283816 | 0.018131 | 0.037825 | 0.064084 | 0.044919 | 0.258780 | 0.269127 | 0.187612 | 0.184580 | 0.044343 | 0.145331 | 0.016448 |
| 0.046298 | 0.051764 | 0.060200 | 0.232258 | 0.234746 | 0.041421 | 0.028352 | 0.068047 | 0.051751 | 0.204797 | 0.216041 | 0.138803 | 0.137946 | 0.022024 | 0.097095 | 0.037632 |
| 0.069269 | 0.069633 | 0.061241 | 0.189713 | 0.192116 | 0.090244 | 0.065720 | 0.081617 | 0.082790 | 0.161723 | 0.174822 | 0.104474 | 0.104231 | 0.056498 | 0.064806 | 0.068895 |
| 0.158105 | 0.148891 | 0.136909 | 0.085083 | 0.076835 | 0.203456 | 0.168466 | 0.123526 | 0.140427 | 0.058277 | 0.062627 | 0.045073 | 0.044244 | 0.165559 | 0.129660 | 0.194216 |
| 0.160966 | 0.154790 | 0.139521 | 0.085344 | 0.075999 | 0.210238 | 0.171881 | 0.131341 | 0.145068 | 0.059569 | 0.053480 | 0.042489 | 0.045476 | 0.164246 | 0.121876 | 0.202369 |
| 0.041257 | 0.049242 | 0.060127 | 0.210556 | 0.212142 | 0.040059 | 0.023768 | 0.056867 | 0.040197 | 0.185345 | 0.197090 | 0.123660 | 0.122353 | 0.017954 | 0.093878 | 0.046290 |
| 0.074074 | 0.077801 | 0.070119 | 0.146340 | 0.154743 | 0.108818 | 0.080786 | 0.073435 | 0.082433 | 0.119812 | 0.137266 | 0.071912 | 0.072196 | 0.067120 | 0.054182 | 0.095400 |
| 0.063910 | 0.056270 | 0.060069 | 0.255164 | 0.256921 | 0.047353 | 0.044338 | 0.085381 | 0.066890 | 0.230615 | 0.243173 | 0.167954 | 0.164906 | 0.050862 | 0.138865 | 0.036666 |
| 0.041703 | 0.041098 | 0.070205 | 0.292806 | 0.292877 | 0.019652 | 0.044870 | 0.068584 | 0.050022 | 0.268046 | 0.278352 | 0.199904 | 0.196538 | 0.060394 | 0.162385 | 0.010453 |
| 0.198868 | 0.163479 | 0.152690 | 0.050617 | 0.031655 | 0.228294 | 0.193102 | 0.130429 | 0.151620 | 0.048260 | 0.056942 | 0.072556 | 0.066847 | 0.205947 | 0.169883 | 0.222274 |
| 0.208676 | 0.170289 | 0.158189 | 0.049401 | 0.030735 | 0.237599 | 0.203220 | 0.135303 | 0.157972 | 0.049466 | 0.057641 | 0.077695 | 0.071977 | 0.217180 | 0.179670 | 0.231632 |
| 0.023188 | 0.027821 | 0.053157 | 0.243299 | 0.241971 | 0.023203 | 0.030283 | 0.041208 | 0.031760 | 0.217510 | 0.227273 | 0.155859 | 0.153354 | 0.050379 | 0.121133 | 0.019807 |
| 0.027021 | 0.035038 | 0.061938 | 0.258243 | 0.257070 | 0.016054 | 0.021822 | 0.048382 | 0.028650 | 0.233202 | 0.242341 | 0.168656 | 0.166112 | 0.040865 | 0.136162 | 0.026741 |
| 0.029588 | 0.038267 | 0.051457 | 0.252289 | 0.256436 | 0.026498 | 0.028767 | 0.061881 | 0.044442 | 0.223783 | 0.237427 | 0.155996 | 0.153827 | 0.035899 | 0.114554 | 0.020628 |
| 0.029055 | 0.052278 | 0.059783 | 0.228175 | 0.233626 | 0.038091 | 0.018697 | 0.063440 | 0.043848 | 0.195716 | 0.210328 | 0.128991 | 0.127972 | 0.024132 | 0.095660 | 0.060453 |
| 0.257766 | 0.208027 | 0.194145 | 0.046947 | 0.043799 | 0.285212 | 0.252255 | 0.161763 | 0.189417 | 0.066519 | 0.087310 | 0.114421 | 0.106177 | 0.261619 | 0.208431 | 0.276575 |
| 0.268061 | 0.217315 | 0.201660 | 0.046873 | 0.043931 | 0.296769 | 0.263040 | 0.171817 | 0.199925 | 0.066829 | 0.087266 | 0.119557 | 0.110001 | 0.271361 | 0.213544 | 0.288712 |
| 0.033711 | 0.033995 | 0.060566 | 0.265725 | 0.263580 | 0.011272 | 0.026354 | 0.059876 | 0.035450 | 0.241235 | 0.250699 | 0.179259 | 0.175988 | 0.051644 | 0.152098 | 0.017889 |
| 0.034684 | 0.045144 | 0.060884 | 0.239528 | 0.243269 | 0.027613 | 0.017182 | 0.055243 | 0.038704 | 0.217888 | 0.232465 | 0.154867 | 0.151380 | 0.027336 | 0.117034 | 0.047446 |
| 0.060837 | 0.057717 | 0.052846 | 0.187746 | 0.189132 | 0.078738 | 0.054892 | 0.059151 | 0.059767 | 0.171609 | 0.187656 | 0.124794 | 0.121738 | 0.088129 | 0.121735 | 0.096121 |
| 0.054500 | 0.044603 | 0.047996 | 0.242628 | 0.243569 | 0.042608 | 0.042488 | 0.069964 | 0.055239 | 0.222690 | 0.235761 | 0.163835 | 0.160468 | 0.058533 | 0.135898 | 0.033277 |
| 0.180370 | 0.157911 | 0.143507 | 0.058160 | 0.059672 | 0.224229 | 0.192456 | 0.127790 | 0.146590 | 0.034979 | 0.052992 | 0.039273 | 0.038258 | 0.188539 | 0.149031 | 0.216233 |
| 0.177242 | 0.158411 | 0.145291 | 0.066334 | 0.064514 | 0.220956 | 0.191326 | 0.130472 | 0.148408 | 0.038354 | 0.054569 | 0.039890 | 0.039789 | 0.188225 | 0.151485 | 0.210786 |
| 0.032730 | 0.034816 | 0.048201 | 0.197935 | 0.200441 | 0.034722 | 0.022262 | 0.039018 | 0.027543 | 0.170291 | 0.185145 | 0.114799 | 0.112569 | 0.031703 | 0.104388 | 0.049047 |
| 0.025422 | 0.027016 | 0.047907 | 0.224264 | 0.226462 | 0.022889 | 0.026047 | 0.038166 | 0.025947 | 0.197629 | 0.211016 | 0.136008 | 0.133793 | 0.035633 | 0.116473 | 0.024493 |
| 0.049162 | 0.030067 | 0.040615 | 0.215378 | 0.217413 | 0.037648 | 0.038451 | 0.048862 | 0.040403 | 0.195161 | 0.208853 | 0.142110 | 0.137816 | 0.055665 | 0.132189 | 0.025844 |
| 0.037008 | 0.025930 | 0.051042 | 0.254030 | 0.254154 | 0.019200 | 0.037915 | 0.048568 | 0.034424 | 0.231206 | 0.242522 | 0.171321 | 0.167326 | 0.059929 | 0.152240 | 0.011157 |







# Microbial composition

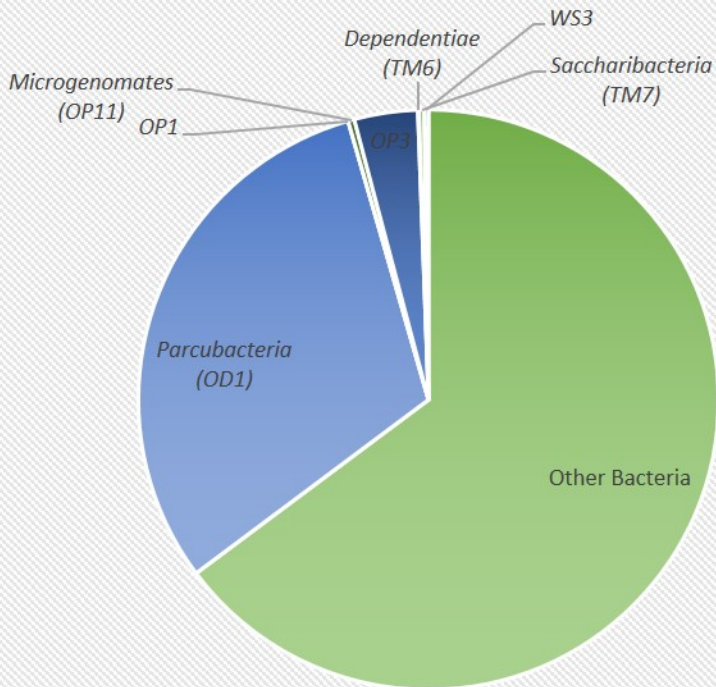

Fig. S1

Bacterial composition of water samples. See Table S2 reporting the relative abundance of the bacteria recovered.



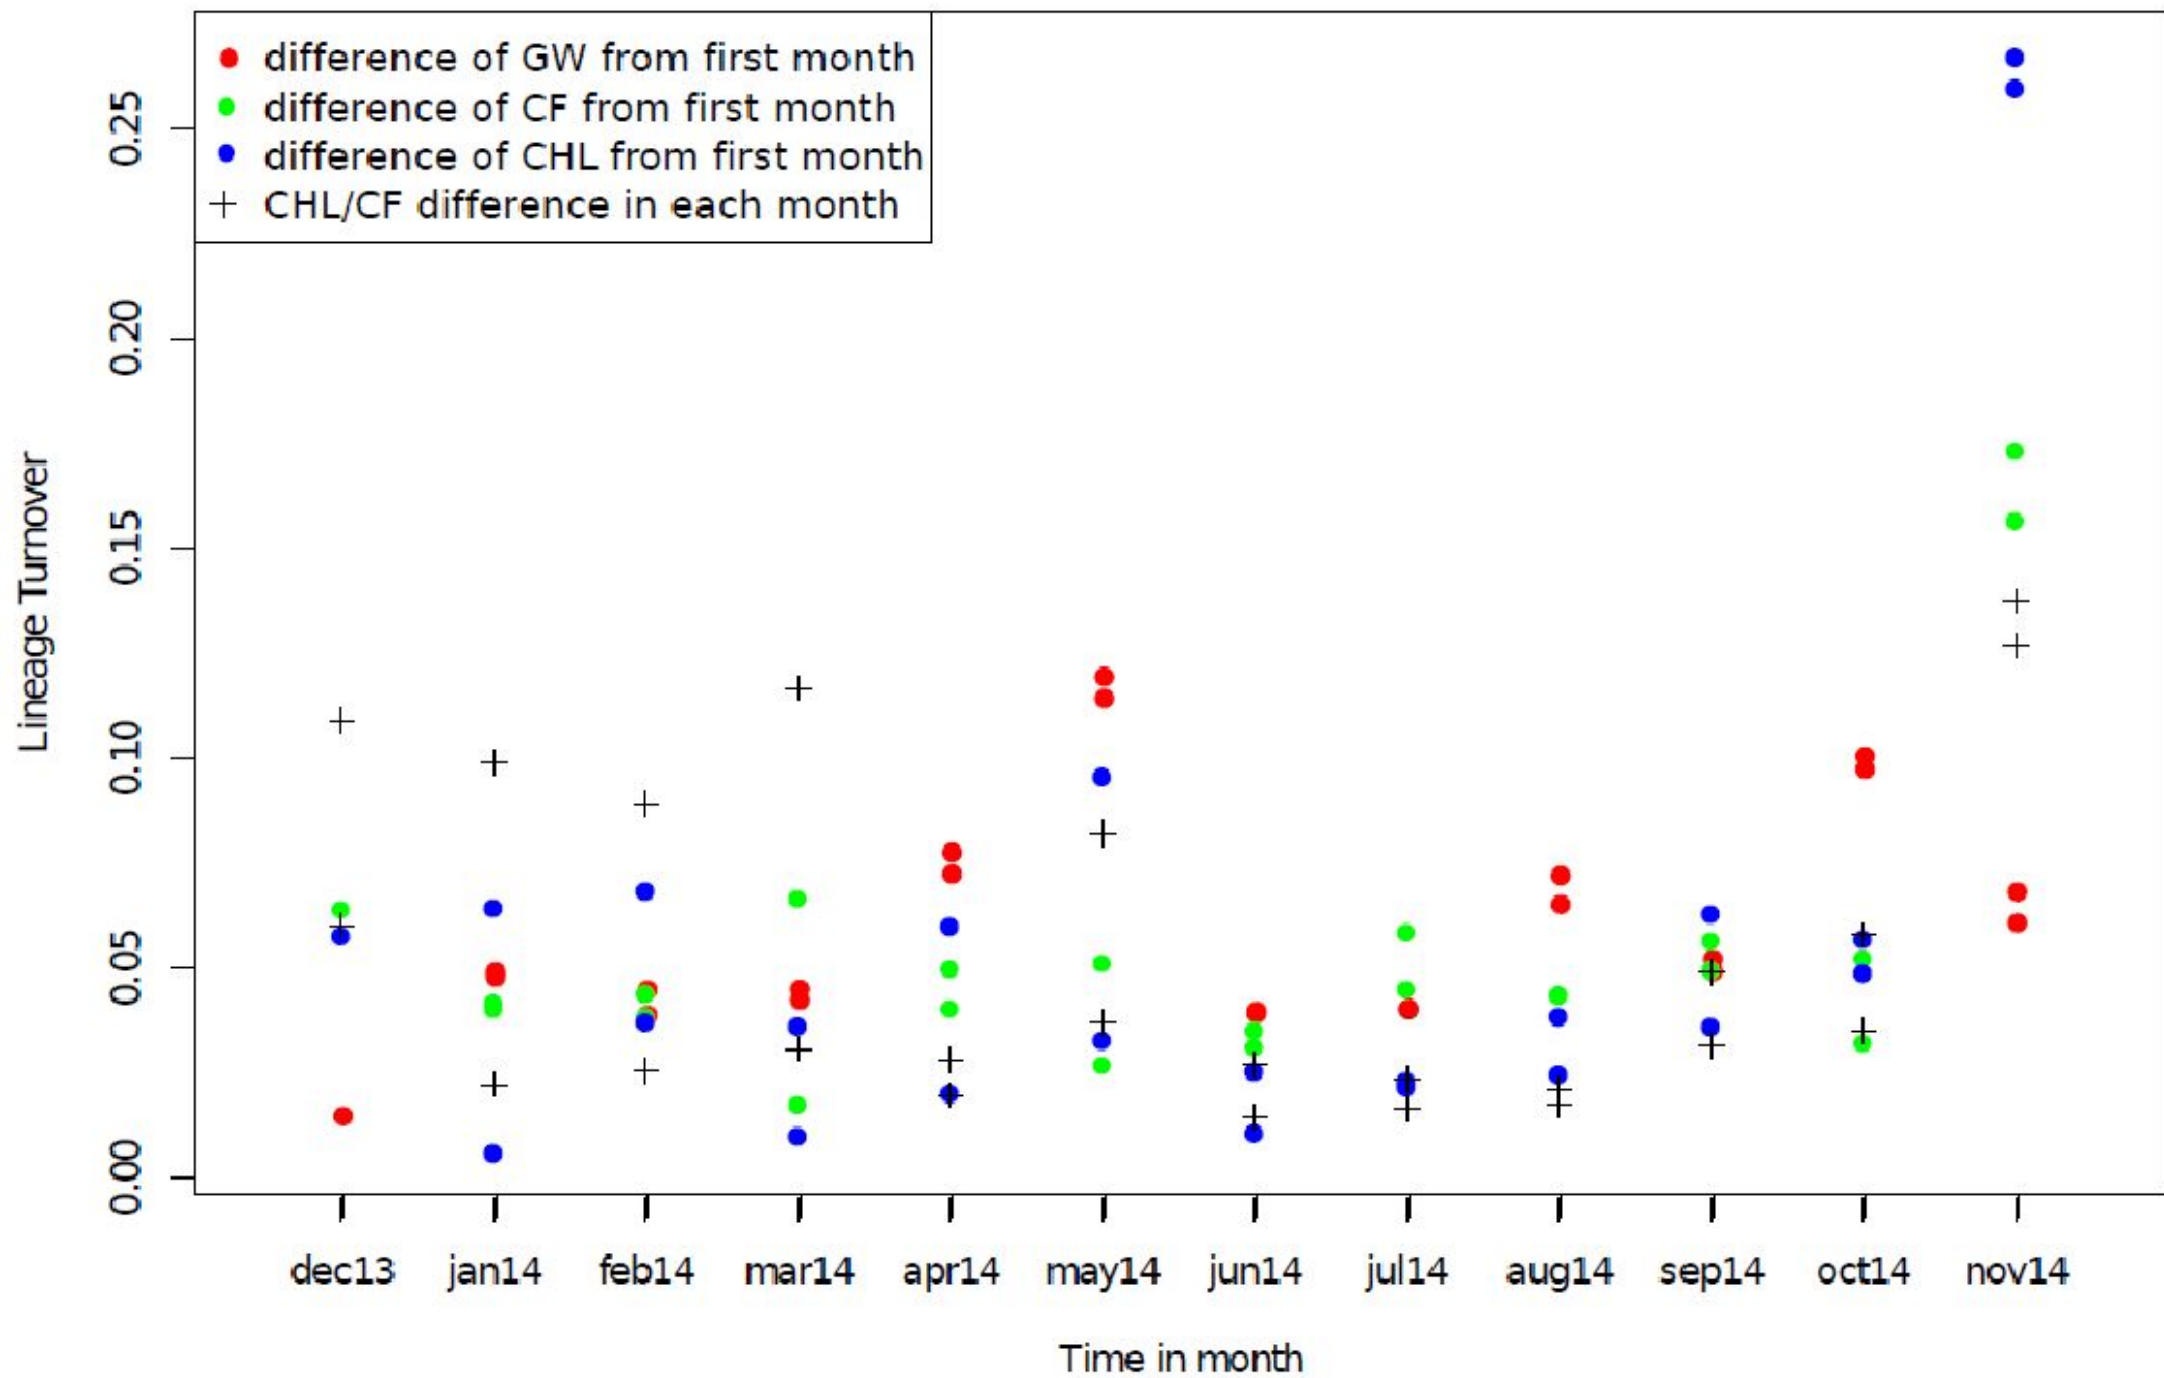

Fig. S2

Change over time and sampling points within a DWTP (Site 1), expressed as *turnover*. The three series of circles show the change with respect to the first sample in December 2013 of their respective technical replica and the other sampling time points. Red, green, and blue circles indicate GW, CF, and CHL compartments, respectively. The cross indicates a comparison for each replica and each time between compartments CF and CHL. Notice that the samples from November 2014 are different from others in CF and CHL compartments (green and blue circles), due to the renewal of carbon filters in the DWTP. Notice that, excluding November 2014, variation across compartments CF and CHL and variation within the three compartments across time are similar and comparable to variation across replicas, indicating a seeding effect of CF on CHL and a lack of a strong temporal trend. This seeding effect is present in the last sample given that differences are smaller across compartment than across time in CHL (blue circle); in November 2014, CHL sample is more different from CF than in the other sampling time points (see also Fig. 1).

**output\_phylolh\_site1**

# Partitioning information in /home/anna/Scrivania/openw/progetto\_acqua/16S\_merge\_work/phyloH.raxml

## Table of Contents

### The run call was:

```

esecutorePhyloHPandas.py -s /home/anna/Scrivania/openw/progetto_acqua/16S_merge_work/phyloH.raxml/paper.phylo.20.11/otu_paper.sample.txt -t
/home/anna/Scrivania/openw/progetto_acqua/16S_merge_work/phyloH.raxml/paper.phylo.20.11/nanoarchea_taxa_mod.txt -f
/home/anna/Scrivania/openw/progetto_acqua/16S_merge_work/phyloH.raxml/paper.phylo.20.11/nanoarchea.lb.rm.reroot_newick.txt -g
/home/anna/Scrivania/openw/progetto_acqua/16S_merge_work/phyloH.raxml/paper.phylo.20.11/map_h2o_M_cre.fil.rm.txt -r 999 -h 1 -q 1 -e 1 -k 1 -o
/home/anna/Scrivania/openw/progetto_acqua/16S_merge_work/phyloH.raxml/paper.phylo.20.11/nano_arche.lb.cre.fil.rm.samP.999.e1.k1

```

### Experimental Design:

Counts of observations across groups and samples within groups

| Total Counts | Group Name | Group Counts | Sample Name | Sample Counts |         |        |
|--------------|------------|--------------|-------------|---------------|---------|--------|
| 4041318      | Aquifer    | 534149       | 10A.r.s     | 62411         |         |        |
|              |            |              | 10A.s       | 27577         |         |        |
|              |            |              | 11A.r.s     | 1795          |         |        |
|              |            |              | 11A.s       | 14254         |         |        |
|              |            |              | 12A.r.s     | 87148         |         |        |
|              |            |              | 12A.s       | 8342          |         |        |
|              |            |              | 13A.r.s     | 51516         |         |        |
|              |            |              | 13A.s       | 20891         |         |        |
|              |            |              | 14A.r.s     | 14924         |         |        |
|              |            |              | 14A.s       | 7225          |         |        |
|              |            |              | 3A.r.s      | 251395        |         |        |
|              |            |              | 3A.s        | 7622          |         |        |
|              |            |              | 4A.r.s      | 21877         |         |        |
|              |            |              | 4A.s        | 84514         |         |        |
|              |            |              | 5A.r.s      | 283518        |         |        |
|              |            |              | 5A.s        | 5704          |         |        |
|              |            |              | 6A.r.s      | 73243         |         |        |
|              |            |              | 6A.s        | 22480         |         |        |
|              |            |              | 7A.r.s      | 27784         |         |        |
|              |            |              | 7A.s        | 12747         |         |        |
|              |            |              | 8A.r.s      | 8572          |         |        |
|              |            |              | 8A.s        | 202073        |         |        |
|              |            |              | 9A.r.s      | 10728         |         |        |
|              |            |              | 9A.s        | 17584         |         |        |
|              |            |              | Cfilters    | 1862664       | 10B.r.s | 33918  |
|              |            |              |             |               | 10B.s   | 88003  |
|              |            |              |             |               | 11B.r.s | 5133   |
|              |            |              |             |               | 11B.s   | 8683   |
|              |            |              |             |               | 12B.r.s | 12796  |
|              |            |              |             |               | 12B.s   | 196761 |
|              |            |              |             |               | 13B.r.s | 80259  |
|              |            |              |             |               | 13B.s   | 43550  |
|              |            |              |             |               | 3B.r.s  | 151853 |
|              |            |              |             |               | 3B.s    | 101531 |
|              |            |              |             |               | 4B.r.s  | 14119  |
|              |            |              |             |               | 4B.s    | 25605  |
| 5B.r.s       | 64882      |              |             |               |         |        |
| 5B.s         | 58469      |              |             |               |         |        |
| 6B.r.s       | 102777     |              |             |               |         |        |
| 6B.s         | 2654       |              |             |               |         |        |
| 7B.r.s       | 19608      |              |             |               |         |        |
| 7B.s         | 85755      |              |             |               |         |        |
| 8B.r.s       | 14488      |              |             |               |         |        |
| 8B.s         | 20192      |              |             |               |         |        |
| 9B.r.s       | 3972       |              |             |               |         |        |
| 9B.s         | 18927      |              |             |               |         |        |
| Chlor        | 1644505    | 10C.r.s      | 1106        |               |         |        |

|  |  |                |               |
|--|--|----------------|---------------|
|  |  | <b>10C.s</b>   | <b>9801</b>   |
|  |  | <b>11C.r.s</b> | <b>20449</b>  |
|  |  | <b>11C.s</b>   | <b>56553</b>  |
|  |  | <b>12C.r.s</b> | <b>22187</b>  |
|  |  | <b>12C.s</b>   | <b>48275</b>  |
|  |  | <b>13C.r.s</b> | <b>13944</b>  |
|  |  | <b>13C.s</b>   | <b>228900</b> |
|  |  | <b>3C.r.s</b>  | <b>100190</b> |
|  |  | <b>3C.s</b>    | <b>21846</b>  |
|  |  | <b>4C.r.s</b>  | <b>7657</b>   |
|  |  | <b>4C.s</b>    | <b>2580</b>   |
|  |  | <b>5C.r.s</b>  | <b>53103</b>  |
|  |  | <b>5C.s</b>    | <b>22565</b>  |
|  |  | <b>6C.r.s</b>  | <b>612596</b> |
|  |  | <b>6C.s</b>    | <b>212195</b> |
|  |  | <b>7C.r.s</b>  | <b>46101</b>  |
|  |  | <b>7C.s</b>    | <b>34101</b>  |
|  |  | <b>8C.r.s</b>  | <b>4789</b>   |
|  |  | <b>8C.s</b>    | <b>14021</b>  |
|  |  | <b>9C.r.s</b>  | <b>18105</b>  |
|  |  | <b>9C.s</b>    | <b>10395</b>  |

### Entropy across samples, groups and samples within groups

MaxDiversity gives the values for a maximally balanced experimental design

|               | nats | Diversity | MaxDiversity |
|---------------|------|-----------|--------------|
| <b>H(G)</b>   | 1.1  | 3.0       | 3.0          |
| <b>H(S)</b>   | 4.22 | 68.0      | 68.0         |
| <b>H(S G)</b> | 3.12 | 22.7      | 22.7         |

### Gamma diversities:

Total entropy and diversity within each group and overall data

Unit measure for Diversity is equivalent number of independent equi-abundant lineages

|                 | nats  | Diversity |
|-----------------|-------|-----------|
| <b>Group</b>    |       |           |
| <b>Aquifer</b>  | 0.798 | 2.22      |
| <b>Cfilters</b> | 0.435 | 1.54      |
| <b>Chlor</b>    | 0.451 | 1.57      |
| <b>Overall</b>  | 0.677 | 1.97      |

### Alpha diversities:

Mean entropy and diversity within sample or group

Unit measure for Diversity is equivalent number of independent equi-abundant lineages

|               | nats  | Diversity |
|---------------|-------|-----------|
| <b>H(T S)</b> | 0.496 | 1.64      |
| <b>H(T G)</b> | 0.568 | 1.77      |

### Beta diversity:

Information shared across Tree and Sample or Group vector expressed as nats and turnover of lineage.

Turnover is the percentage of observations not shared across groups

Pvalue is computed with Permutation procedure

|                 | nats   | TurnOver | pvalue |
|-----------------|--------|----------|--------|
| <b>I(T,G)</b>   | 0.109  | 9.96%    | 0.0    |
| <b>I(T,S G)</b> | 0.0718 | 2.3%     | 0.0    |

### Difference of each group from total:

phylogenetic Kullback-Leiber distance between each group and the overall data

|  |  |
|--|--|
|  |  |
|--|--|

|                 | KullBack-Lieber(PG(i)  Ptot(i)) |
|-----------------|---------------------------------|
| <b>Group</b>    |                                 |
| <b>Aquifer</b>  | 0.194                           |
| <b>Cfilters</b> | 0.0582                          |
| <b>Chlor</b>    | 0.0573                          |

## Pairwise TurnOver between groups

|                 | Aquifer | Cfilters | Chlor |
|-----------------|---------|----------|-------|
| <b>Aquifer</b>  |         |          |       |
| <b>Cfilters</b> | 14.0%   |          |       |
| <b>Chlor</b>    | 12.6%   | 0.573%   |       |

## Per Node Statistics mapped on the phylogeny

Three types of data are shown on the tree:

1. The color of the branches cyan indicates a contribution to I(T,E) higher than the null distribution, while branches are black otherwise.
2. The background of each branch is a gradient from yellow to red for increased contribution to I(T,E). For details look at the legend on the side
3. Bar plot on each tips indicates the relative frequencies in each group

Look at the tree find an relevant branches and text search the label of the branch to access the correct row on the by node statistics table.

Go itol using the link to modify the tree, or use the itol table and the labelled tree to add further data set (i.e. taxonomic name)

[Click here to modify image](#)

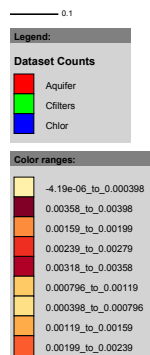

## Per Node Statistics in tabular format:

|          |         | Metric   | I(Ti,G)  |         |          |        | By Group Relative Frequency |         |          | I(Ti,S G) |          |
|----------|---------|----------|----------|---------|----------|--------|-----------------------------|---------|----------|-----------|----------|
|          |         |          | Stat     | nats    | TurnOver | pvalue | MultTest                    | Aquifer | Cfilters | Chlor     | nats     |
| Name     | Is_Leaf | Taxonomy |          |         |          |        |                             |         |          |           |          |
| L575     | False   | Bacteria | 0.00437  | 0.398%  | 0.0      | 1      | 0.518                       | 0.0543  | 0.0812   | 0.00069   | 0.0221%  |
| L420     | False   | Bacteria | 0.00394  | 0.359%  | 0.0      | 1      | 0.586                       | 0.0738  | 0.103    | 0.000581  | 0.0186%  |
| OTU_6998 | True    | ZB2      | 0.00375  | 0.341%  | 0.0      | 1      | 0.000644                    | 0.0416  | 0.186    | 0.00298   | 0.0955%  |
| L526     | False   | Bacteria | 0.00375  | 0.341%  | 0.0      | 1      | 0.526                       | 0.055   | 0.0844   | 0.000611  | 0.0196%  |
| L1372    | False   | OD1      | 0.00305  | 0.278%  | 0.0      | 1      | 0.0426                      | 0.683   | 0.576    | 0.000622  | 0.0199%  |
| L422     | False   | Bacteria | 0.00301  | 0.274%  | 0.0      | 1      | 0.568                       | 0.0611  | 0.0919   | 0.000435  | 0.0139%  |
| L1326    | False   | OD1      | 0.00292  | 0.266%  | 0.0      | 1      | 0.0929                      | 0.741   | 0.777    | 0.000342  | 0.0109%  |
| L527     | False   | Bacteria | 0.00265  | 0.241%  | 0.0      | 1      | 0.525                       | 0.055   | 0.0844   | 0.000432  | 0.0139%  |
| L1324    | False   | OD1      | 0.00261  | 0.237%  | 0.0      | 1      | 0.13                        | 0.748   | 0.78     | 0.000335  | 0.0107%  |
| L1379    | False   | ZB2      | 0.0026   | 0.237%  | 0.0      | 1      | 0.0147                      | 0.599   | 0.456    | 0.000866  | 0.0277%  |
| L1375    | False   | OD1      | 0.00257  | 0.234%  | 0.0      | 1      | 0.0159                      | 0.599   | 0.456    | 0.00087   | 0.0279%  |
| L1331    | False   | OD1      | 0.00252  | 0.23%   | 0.0      | 1      | 0.0917                      | 0.741   | 0.777    | 0.00029   | 0.00928% |
| L1363    | False   | OD1      | 0.00236  | 0.215%  | 0.0      | 1      | 0.0709                      | 0.73    | 0.766    | 0.000258  | 0.00825% |
| L1325    | False   | OD1      | 0.00208  | 0.19%   | 0.0      | 1      | 0.112                       | 0.745   | 0.779    | 0.000252  | 0.00808% |
| L421     | False   | Bacteria | 0.00196  | 0.179%  | 0.0      | 1      | 0.579                       | 0.0733  | 0.102    | 0.000303  | 0.00971% |
| L921     | False   | koll11   | 0.00179  | 0.163%  | 0.0      | 1      | 0.226                       | 0.0249  | 0.0375   | 0.000367  | 0.0117%  |
| L1328    | False   | OD1      | 0.00176  | 0.16%   | 0.0      | 1      | 0.0919                      | 0.741   | 0.777    | 0.000203  | 0.00649% |
| L1391    | False   | ZB2      | 0.0014   | 0.127%  | 0.0      | 1      | 0.013                       | 0.369   | 0.323    | 0.00127   | 0.0408%  |
| L1315    | False   | OD1      | 0.00138  | 0.126%  | 0.0      | 1      | 0.235                       | 0.762   | 0.789    | 0.000314  | 0.0101%  |
| L612     | False   | OP3      | 0.00125  | 0.113%  | 0.0      | 1      | 0.478                       | 0.0515  | 0.0792   | 0.000246  | 0.00787% |
| L1350    | False   | OD1      | 0.00122  | 0.111%  | 0.0      | 1      | 0.0861                      | 0.74    | 0.775    | 0.000139  | 0.00445% |
| L1330    | False   | OD1      | 0.00114  | 0.104%  | 0.0      | 1      | 0.0918                      | 0.741   | 0.777    | 0.000131  | 0.00421% |
| L1323    | False   | OD1      | 0.00114  | 0.103%  | 0.0      | 1      | 0.224                       | 0.761   | 0.789    | 0.000244  | 0.00781% |
| L920     | False   | koll11   | 0.00111  | 0.101%  | 0.0      | 1      | 0.239                       | 0.0263  | 0.0394   | 0.000187  | 0.00598% |
| L576     | False   | Bacteria | 0.0011   | 0.1%    | 0.0      | 1      | 0.514                       | 0.0543  | 0.0809   | 0.000173  | 0.00553% |
| L1373    | False   | OD1      | 0.00106  | 0.0966% | 0.0      | 1      | 0.0163                      | 0.599   | 0.456    | 0.00036   | 0.0115%  |
| L914     | False   | OP3      | 0.00106  | 0.0963% | 0.0      | 1      | 0.24                        | 0.0264  | 0.0394   | 0.000174  | 0.00557% |
| L1381    | False   | ZB2      | 0.00104  | 0.0949% | 0.0      | 1      | 0.0147                      | 0.599   | 0.455    | 0.000347  | 0.0111%  |
| L1332    | False   | OD1      | 0.00102  | 0.0933% | 0.0      | 1      | 0.0905                      | 0.741   | 0.776    | 0.000117  | 0.00376% |
| L973     | False   | koll11   | 0.000971 | 0.0885% | 0.0      | 1      | 0.169                       | 0.0197  | 0.0267   | 0.000207  | 0.00663% |
| L983     | False   | koll11   | 0.000905 | 0.0825% | 0.0      | 1      | 0.159                       | 0.0183  | 0.0258   | 0.000196  | 0.00629% |
| L1386    | False   | ZB2      | 0.00089  | 0.0811% | 0.0      | 1      | 0.00169                     | 0.222   | 0.129    | 0.0012    | 0.0385%  |
| L1587    | False   | ZB2      | 0.00073  | 0.0665% | 0.0      | 1      | 0.000808                    | 0.0416  | 0.186    | 0.000585  | 0.0187%  |
| L1407    | False   | ZB2      | 0.000705 | 0.0642% | 0.0      | 1      | 0.00479                     | 0.303   | 0.291    | 0.000817  | 0.0262%  |
| L1768    | False   | OD1      | 0.000639 | 0.0582% | 0.0      | 1      | 0.0323                      | 0.00459 | 0.00215  | 0.000843  | 0.027%   |
| L1383    | False   | ZB2      | 0.000626 | 0.057%  | 0.0      | 1      | 0.0147                      | 0.594   | 0.454    | 0.000217  | 0.00695% |
| L840     | False   | OP3      | 0.000602 | 0.0548% | 0.0      | 1      | 0.0655                      | 0.00615 | 0.00876  | 0.00025   | 0.008%   |
| L620     | False   | OP3      | 0.000571 | 0.052%  | 0.0      | 1      | 0.478                       | 0.0515  | 0.0792   | 0.000114  | 0.00364% |
| L1401    | False   | ZB2      | 0.00055  | 0.0501% | 0.0      | 1      | 0.00777                     | 0.366   | 0.321    | 0.000471  | 0.0151%  |
| L1393    | False   | ZB2      | 0.000536 | 0.0488% | 0.0      | 1      | 0.0123                      | 0.369   | 0.323    | 0.000483  | 0.0155%  |
| L1370    | False   | OD1      | 0.000517 | 0.0471% | 0.0      | 1      | 0.0701                      | 0.687   | 0.578    | 0.000124  | 0.00398% |
| L706     | False   | OP3      | 0.000513 | 0.0467% | 0.0      | 1      | 0.115                       | 0.0118  | 0.0212   | 0.000253  | 0.00811% |
| OTU_7148 | True    | OD1      | 0.000505 | 0.046%  | 0.0      | 1      | 0.03                        | 0.00436 | 0.00202  | 0.000781  | 0.025%   |
| L861     | False   | koll11   | 0.000485 | 0.0442% | 0.0      | 1      | 0.0263                      | 0.00313 | 0.00442  | 0.000176  | 0.00564% |
| L622     | False   | OP3      | 0.000454 | 0.0414% | 0.0      | 1      | 0.145                       | 0.0159  | 0.0266   | 0.000165  | 0.00529% |
| L990     | False   | koll11   | 0.000449 | 0.0409% | 0.0      | 1      | 0.141                       | 0.0157  | 0.0246   | 8.54e-05  | 0.00274% |
| L938     | False   | koll11   | 0.000447 | 0.0407% | 0.0      | 1      | 0.221                       | 0.0247  | 0.037    | 9.11e-05  | 0.00292% |
| L1371    | False   | OD1      | 0.000439 | 0.04%   | 0.0      | 1      | 0.0694                      | 0.687   | 0.578    | 0.000106  | 0.00339% |
| L925     | False   | koll11   | 0.000433 | 0.0395% | 0.0      | 1      | 0.225                       | 0.0249  | 0.0375   | 8.96e-05  | 0.00287% |
| L443     | False   | OP11     | 0.000429 | 0.0391% | 0.0      | 1      | 0.039                       | 0.00528 | 0.0051   | 0.00021   | 0.00672% |
| L458     | False   | OP11-4   | 0.000426 | 0.0388% | 0.0      | 1      | 0.0345                      | 0.00504 | 0.00409  | 0.000225  | 0.00721% |
| L621     | False   | OP3      | 0.000418 | 0.0381% | 0.0      | 1      | 0.237                       | 0.0252  | 0.0398   | 0.000119  | 0.0038%  |
| L1388    | False   | ZB2      | 0.000398 | 0.0363% | 0.0      | 1      | 0.00168                     | 0.221   | 0.128    | 0.000549  | 0.0176%  |

|          |       |          |          |         |     |   |          |          |          |          |           |
|----------|-------|----------|----------|---------|-----|---|----------|----------|----------|----------|-----------|
| OTU_6187 | True  | ZB2      | 0.00037  | 0.0337% | 0.0 | 1 | 0.000158 | 0.015    | 0.0245   | 0.000729 | 0.0234%   |
| OTU_65   | True  | OD1      | 0.000365 | 0.0332% | 0.0 | 1 | 0.00607  | 0.000764 | 0.000195 | 0.000437 | 0.014%    |
| L838     | False | OP3      | 0.000341 | 0.031%  | 0.0 | 1 | 0.0658   | 0.00615  | 0.00876  | 0.000141 | 0.00452%  |
| L644     | False | OP3      | 0.000331 | 0.0302% | 0.0 | 1 | 0.134    | 0.0142   | 0.0261   | 0.000137 | 0.0044%   |
| L927     | False | koll11   | 0.000328 | 0.0299% | 0.0 | 1 | 0.224    | 0.0249   | 0.0375   | 6.84e-05 | 0.00219%  |
| L783     | False | OP3      | 0.000326 | 0.0297% | 0.0 | 1 | 0.0504   | 0.00501  | 0.0112   | 0.000236 | 0.00757%  |
| L1403    | False | ZB2      | 0.00032  | 0.0291% | 0.0 | 1 | 0.000597 | 0.0635   | 0.0306   | 0.000553 | 0.0177%   |
| L929     | False | koll11   | 0.000312 | 0.0285% | 0.0 | 1 | 0.224    | 0.0248   | 0.037    | 6.38e-05 | 0.00204%  |
| L707     | False | PBS-25   | 0.000309 | 0.0281% | 0.0 | 1 | 0.051    | 0.00565  | 0.00829  | 0.000217 | 0.00694%  |
| L1384    | False | ZB2      | 0.000308 | 0.0281% | 0.0 | 1 | 0.00172  | 0.225    | 0.13     | 0.000398 | 0.0128%   |
| L577     | False | PRR-12   | 0.000306 | 0.0279% | 0.0 | 1 | 0.0354   | 0.00278  | 0.00165  | 0.000164 | 0.00526%  |
| L1680    | False | OD1      | 0.000304 | 0.0277% | 0.0 | 1 | 0.0178   | 0.00273  | 0.00139  | 0.000132 | 0.00422%  |
| L1431    | False | ZB2      | 0.000302 | 0.0275% | 0.0 | 1 | 0.00589  | 0.0509   | 0.079    | 0.000263 | 0.00842%  |
| OTU_5414 | True  | ZB2      | 0.000298 | 0.0272% | 0.0 | 1 | 0.00356  | 0.267    | 0.211    | 0.000539 | 0.0173%   |
| L173     | False | SM2F11   | 0.000292 | 0.0266% | 0.0 | 1 | 0.0117   | 0.00198  | 0.000548 | 0.000173 | 0.00555%  |
| L1767    | False | OD1      | 0.000289 | 0.0263% | 0.0 | 1 | 0.0754   | 0.0103   | 0.00573  | 0.000116 | 0.00371%  |
| L39      | False | OD1      | 0.00028  | 0.0255% | 0.0 | 1 | 0.0143   | 0.000514 | 0.00232  | 0.000172 | 0.00551%  |
| OTU_185  | True  | PRR-12   | 0.00027  | 0.0246% | 0.0 | 1 | 0.0141   | 0.00099  | 0.000555 | 0.000456 | 0.0146%   |
| L940     | False | koll11   | 0.000265 | 0.0242% | 0.0 | 1 | 0.221    | 0.0247   | 0.0369   | 5.4e-05  | 0.00173%  |
| L1427    | False | ZB2      | 0.000264 | 0.0241% | 0.0 | 1 | 0.0127   | 0.0812   | 0.112    | 0.000309 | 0.0099%   |
| L968     | False | koll11   | 0.000258 | 0.0235% | 0.0 | 1 | 0.18     | 0.0214   | 0.0304   | 5.65e-05 | 0.00181%  |
| L950     | False | koll11   | 0.000256 | 0.0233% | 0.0 | 1 | 0.21     | 0.0237   | 0.0354   | 5.78e-05 | 0.00185%  |
| L1317    | False | OD1      | 0.000253 | 0.023%  | 0.0 | 1 | 0.00904  | 0.000614 | 0.0005   | 0.00017  | 0.00544%  |
| L931     | False | koll11   | 0.000247 | 0.0225% | 0.0 | 1 | 0.224    | 0.0248   | 0.037    | 5.04e-05 | 0.00161%  |
| L1410    | False | ZB2      | 0.00024  | 0.0219% | 0.0 | 1 | 0.00467  | 0.298    | 0.282    | 0.0003   | 0.00961%  |
| L1782    | False | OD1      | 0.000229 | 0.0209% | 0.0 | 1 | 0.0335   | 0.00442  | 0.00306  | 0.000139 | 0.00446%  |
| OTU_81   | True  | OD1      | 0.000228 | 0.0208% | 0.0 | 1 | 0.00702  | 0.00205  | 0.000547 | 0.000403 | 0.0129%   |
| L1741    | False | OD1      | 0.000223 | 0.0203% | 0.0 | 1 | 0.0944   | 0.0131   | 0.00826  | 7.93e-05 | 0.00254%  |
| OTU_4624 | True  | PRR-11   | 0.000218 | 0.0199% | 0.0 | 1 | 0.00377  | 8.73e-06 | 0.000276 | 0.000526 | 0.0169%   |
| L52      | False | ABY1     | 0.000202 | 0.0184% | 0.0 | 1 | 0.00736  | 0.0506   | 0.0222   | 0.000512 | 0.0164%   |
| L987     | False | koll11   | 0.000199 | 0.0181% | 0.0 | 1 | 0.153    | 0.0176   | 0.0256   | 4.18e-05 | 0.00134%  |
| L457     | False | OP11     | 0.000194 | 0.0177% | 0.0 | 1 | 0.0375   | 0.00518  | 0.00417  | 8.77e-05 | 0.00281%  |
| L1408    | False | ZB2      | 0.000194 | 0.0176% | 0.0 | 1 | 0.00468  | 0.299    | 0.283    | 0.000241 | 0.00772%  |
| L423     | False | Bacteria | 0.000192 | 0.0175% | 0.0 | 1 | 0.0417   | 0.00603  | 0.00747  | 0.000116 | 0.00371%  |
| L1809    | False | OD1      | 0.000191 | 0.0174% | 0.0 | 1 | 0.00972  | 0.0011   | 0.000192 | 0.000156 | 0.00501%  |
| L1428    | False | ZB2      | 0.000184 | 0.0168% | 0.0 | 1 | 0.0111   | 0.0521   | 0.0801   | 0.000209 | 0.00671%  |
| L1429    | False | ZB2      | 0.000181 | 0.0165% | 0.0 | 1 | 0.0062   | 0.0509   | 0.079    | 0.000159 | 0.00508%  |
| L645     | False | koll11   | 0.00018  | 0.0164% | 0.0 | 1 | 0.0186   | 0.00244  | 0.0049   | 0.0001   | 0.00321%  |
| L744     | False | OP3      | 0.000174 | 0.0158% | 0.0 | 1 | 0.0641   | 0.00611  | 0.0129   | 8.39e-05 | 0.00269%  |
| L90      | False | ABY1     | 0.000172 | 0.0156% | 0.0 | 1 | 0.0241   | 0.00513  | 0.00116  | 9.31e-05 | 0.00298%  |
| L583     | False | PRR-12   | 0.000159 | 0.0145% | 0.0 | 1 | 0.014    | 0.00144  | 0.000858 | 0.000142 | 0.00454%  |
| L1797    | False | OD1      | 0.000157 | 0.0143% | 0.0 | 1 | 0.0288   | 0.0036   | 0.00255  | 0.000105 | 0.00335%  |
| L1742    | False | OD1      | 0.000155 | 0.0141% | 0.0 | 1 | 0.019    | 0.00281  | 0.00252  | 0.000115 | 0.00367%  |
| L969     | False | koll11   | 0.000154 | 0.014%  | 0.0 | 1 | 0.177    | 0.0208   | 0.0282   | 3.15e-05 | 0.00101%  |
| L977     | False | koll11   | 0.000146 | 0.0133% | 0.0 | 1 | 0.163    | 0.0189   | 0.0262   | 3.03e-05 | 0.000971% |
| L467     | False | OP11-4   | 0.000143 | 0.013%  | 0.0 | 1 | 0.0297   | 0.00439  | 0.00327  | 9.88e-05 | 0.00317%  |
| L1829    | False | OD1      | 0.000142 | 0.0129% | 0.0 | 1 | 0.013    | 0.00207  | 0.00192  | 0.00014  | 0.0045%   |
| L711     | False | PBS-25   | 0.00014  | 0.0128% | 0.0 | 1 | 0.0507   | 0.00565  | 0.00807  | 9.97e-05 | 0.00319%  |
| L441     | False | Bacteria | 0.000139 | 0.0127% | 0.0 | 1 | 0.039    | 0.00541  | 0.00539  | 6.98e-05 | 0.00223%  |
| L1539    | False | ZB2      | 0.000137 | 0.0125% | 0.0 | 1 | 0.0268   | 0.00367  | 0.00277  | 0.000108 | 0.00345%  |
| L934     | False | koll11   | 0.000137 | 0.0125% | 0.0 | 1 | 0.222    | 0.0247   | 0.037    | 2.79e-05 | 0.000893% |
| L1415    | False | ZB2      | 0.000137 | 0.0124% | 0.0 | 1 | 0.000574 | 0.031    | 0.0699   | 0.000263 | 0.00844%  |
| L1452    | False | ZB2      | 0.000136 | 0.0124% | 0.0 | 1 | 0.000524 | 0.024    | 0.0397   | 0.000135 | 0.00434%  |
| L1446    | False | ZB2      | 0.000136 | 0.0124% | 0.0 | 1 | 0.000112 | 0.0207   | 0.0288   | 0.000103 | 0.00329%  |
| L847     | False | koll11   | 0.000135 | 0.0123% | 0.0 | 1 | 0.0315   | 0.0034   | 0.00361  | 8.81e-05 | 0.00282%  |
| L837     | False | OP3      | 0.000134 | 0.0122% | 0.0 | 1 | 0.0921   | 0.00928  | 0.0132   | 3.91e-05 | 0.00125%  |
| OTU_8000 | True  | OD1      | 0.000132 | 0.012%  | 0.0 | 1 | 0.00865  | 0.000614 | 0.000483 | 9.11e-05 | 0.00292%  |
| L578     | False | PRR-12   | 0.000129 | 0.0117% | 0.0 | 1 | 0.0334   | 0.00278  | 0.00165  | 8e-05    | 0.00256%  |
| L709     | False | PBS-25   | 0.000129 | 0.0117% | 0.0 | 1 | 0.0507   | 0.00565  | 0.00829  | 9.31e-05 | 0.00298%  |
| L171     | False | OD1      | 0.000126 | 0.0114% | 0.0 | 1 | 0.0338   | 0.00679  | 0.00442  | 7.42e-05 | 0.00238%  |
| L1497    | False | ZB2      | 0.000125 | 0.0114% | 0.0 | 1 | 0.00159  | 0.0291   | 0.0323   | 0.000379 | 0.0122%   |
| L1783    | False | OD1      | 0.000124 | 0.0113% | 0.0 | 1 | 0.0332   | 0.00442  | 0.00298  | 7.5e-05  | 0.0024%   |
| L1013    | False | koll11   | 0.000123 | 0.0112% | 0.0 | 1 | 0.0223   | 0.00245  | 0.00313  | 5.35e-05 | 0.00171%  |
| L495     | False | OP11-4   | 0.000123 | 0.0112% | 0.0 | 1 | 0.0155   | 0.00222  | 0.00216  | 0.000222 | 0.0071%   |
| L1166    | False | koll11   | 0.000122 | 0.0111% | 0.0 | 1 | 0.0129   | 0.00142  | 0.00194  | 8.39e-05 | 0.00269%  |



|           |       |        |          |          |     |   |          |          |          |          |           |
|-----------|-------|--------|----------|----------|-----|---|----------|----------|----------|----------|-----------|
| L581      | False | PRR-12 | 0.00012  | 0.011%   | 0.0 | 1 | 0.0148   | 0.00144  | 0.000858 | 9.84e-05 | 0.00315%  |
| OTU_7453  | True  | ABY1   | 0.000118 | 0.0107%  | 0.0 | 1 | 0.00408  | 0.000353 | 0.000265 | 0.000135 | 0.00433%  |
| L1841     | False | OD1    | 0.000117 | 0.0107%  | 0.0 | 1 | 0.00936  | 0.0013   | 0.000828 | 9.15e-05 | 0.00293%  |
| L1307     | False | OD1    | 0.000117 | 0.0106%  | 0.0 | 1 | 0.0064   | 0.000399 | 0.000845 | 0.000147 | 0.00472%  |
| L785      | False | OP3    | 0.000116 | 0.0105%  | 0.0 | 1 | 0.0503   | 0.00501  | 0.0112   | 8.4e-05  | 0.00269%  |
| L31       | False | OD1    | 0.000115 | 0.0105%  | 0.0 | 1 | 0.0158   | 0.000543 | 0.00234  | 7.19e-05 | 0.0023%   |
| L51       | False | OD1    | 0.000111 | 0.0101%  | 0.0 | 1 | 0.0491   | 0.109    | 0.0581   | 0.000539 | 0.0173%   |
| L1743     | False | OD1    | 0.00011  | 0.0101%  | 0.0 | 1 | 0.0174   | 0.0019   | 0.000175 | 3.98e-05 | 0.00128%  |
| L61       | False | ABY1   | 0.00011  | 0.01%    | 0.0 | 1 | 0.00124  | 0.0496   | 0.0222   | 0.000145 | 0.00463%  |
| L459      | False | OP11-4 | 0.00011  | 0.01%    | 0.0 | 1 | 0.0305   | 0.00451  | 0.00338  | 6.87e-05 | 0.0022%   |
| L1807     | False | OD1    | 0.000106 | 0.00969% | 0.0 | 1 | 0.0128   | 0.00126  | 0.000386 | 7.04e-05 | 0.00225%  |
| L1010     | False | koll11 | 0.000105 | 0.00953% | 0.0 | 1 | 0.0824   | 0.00944  | 0.0155   | 2.1e-05  | 0.000673% |
| OTU_6636  | True  | ABY1   | 0.000103 | 0.00939% | 0.0 | 1 | 0.00696  | 0.00231  | 0.000915 | 0.00031  | 0.00994%  |
| L713      | False | PBS-25 | 0.000101 | 0.00916% | 0.0 | 1 | 0.0502   | 0.00565  | 0.00804  | 7.27e-05 | 0.00233%  |
| L1449     | False | ZB2    | 0.0001   | 0.00911% | 0.0 | 1 | 0.00142  | 0.0292   | 0.0489   | 8.42e-05 | 0.0027%   |
| L390      | False | ABY1   | 9.85e-05 | 0.00898% | 0.0 | 1 | 0.0052   | 0.000224 | 0.000332 | 5.62e-05 | 0.0018%   |
| L594      | False | PRR-12 | 9.84e-05 | 0.00896% | 0.0 | 1 | 0.0186   | 0.0013   | 0.000671 | 0.000101 | 0.00323%  |
| L790      | False | OP3    | 9.78e-05 | 0.0089%  | 0.0 | 1 | 0.0493   | 0.0049   | 0.0108   | 7.13e-05 | 0.00228%  |
| L1450     | False | ZB2    | 9.72e-05 | 0.00886% | 0.0 | 1 | 0.000562 | 0.0243   | 0.0397   | 9.7e-05  | 0.00311%  |
| L988      | False | koll11 | 9.71e-05 | 0.00885% | 0.0 | 1 | 0.143    | 0.0158   | 0.0248   | 1.79e-05 | 0.000574% |
| L1316     | False | OD1    | 9.7e-05  | 0.00884% | 0.0 | 1 | 0.0107   | 0.000653 | 0.000507 | 4.53e-05 | 0.00145%  |
| L932      | False | koll11 | 9.7e-05  | 0.00883% | 0.0 | 1 | 0.222    | 0.0247   | 0.037    | 1.97e-05 | 0.000632% |
| L1656     | False | OD1    | 9.67e-05 | 0.00881% | 0.0 | 1 | 0.00788  | 0.00229  | 0.000805 | 0.000168 | 0.00538%  |
| L232      | False | ABY1   | 9.67e-05 | 0.00881% | 0.0 | 1 | 0.0133   | 0.00172  | 0.00155  | 8.66e-05 | 0.00277%  |
| L1777     | False | OD1    | 9.58e-05 | 0.00873% | 0.0 | 1 | 0.0431   | 0.00575  | 0.00358  | 3.91e-05 | 0.00125%  |
| L1443     | False | ZB2    | 9.51e-05 | 0.00866% | 0.0 | 1 | 0.00328  | 0.0505   | 0.0787   | 6.79e-05 | 0.00217%  |
| L1781     | False | OD1    | 9.5e-05  | 0.00865% | 0.0 | 1 | 0.0421   | 0.00574  | 0.00358  | 4.16e-05 | 0.00133%  |
| OTU_7957  | True  | OD1    | 9.48e-05 | 0.00864% | 0.0 | 1 | 0.00255  | 0.000179 | 1.82e-05 | 0.000105 | 0.00337%  |
| OTU_5981  | True  | ZB2    | 9.3e-05  | 0.00847% | 0.0 | 1 | 0.000505 | 0.0248   | 0.0649   | 0.000189 | 0.00607%  |
| OTU_7115  | True  | ABY1   | 9.28e-05 | 0.00845% | 0.0 | 1 | 0.000112 | 0.015    | 0.0133   | 0.000167 | 0.00536%  |
| L1028     | False | koll11 | 9.27e-05 | 0.00844% | 0.0 | 1 | 0.029    | 0.00339  | 0.00527  | 3.23e-05 | 0.00104%  |
| L1009     | False | koll11 | 8.98e-05 | 0.00818% | 0.0 | 1 | 0.0848   | 0.00956  | 0.016    | 1.82e-05 | 0.000583% |
| L1246     | False | TM7-1  | 8.87e-05 | 0.00808% | 0.0 | 1 | 2.86e-05 | 0.0112   | 0.0087   | 0.000169 | 0.0054%   |
| OTU_6581  | True  | ZB2    | 8.87e-05 | 0.00808% | 0.0 | 1 | 0.000284 | 0.024    | 0.0397   | 8.39e-05 | 0.00269%  |
| L410      | False | ABY1   | 8.77e-05 | 0.00799% | 0.0 | 1 | 0.000125 | 0.0059   | 0.00827  | 0.000132 | 0.00424%  |
| L72       | False | ABY1   | 7.68e-05 | 0.007%   | 0.0 | 1 | 0.000622 | 0.0389   | 0.0113   | 0.000131 | 0.00419%  |
| L360      | False | ABY1   | 7.66e-05 | 0.00697% | 0.0 | 1 | 0.00616  | 0.000751 | 0.00027  | 0.0001   | 0.00321%  |
| L528      | False | TM6    | 7.6e-05  | 0.00692% | 0.0 | 1 | 0.00747  | 0.000667 | 0.00325  | 0.000249 | 0.00798%  |
| L123      | False | ABY1   | 7.58e-05 | 0.00691% | 0.0 | 1 | 4.16e-05 | 0.0108   | 0.00791  | 0.000117 | 0.00374%  |
| L843      | False | koll11 | 7.58e-05 | 0.0069%  | 0.0 | 1 | 0.0409   | 0.00391  | 0.00539  | 4.61e-05 | 0.00148%  |
| L1808     | False | OD1    | 7.48e-05 | 0.00681% | 0.0 | 1 | 0.0104   | 0.00112  | 0.000203 | 5.48e-05 | 0.00176%  |
| L54       | False | ABY1   | 7.3e-05  | 0.00665% | 0.0 | 1 | 0.00736  | 0.0506   | 0.0222   | 0.000185 | 0.00593%  |
| L68       | False | ABY1   | 7.23e-05 | 0.00659% | 0.0 | 1 | 0.000752 | 0.0472   | 0.0183   | 9.94e-05 | 0.00318%  |
| L989      | False | koll11 | 7.18e-05 | 0.00654% | 0.0 | 1 | 0.143    | 0.0158   | 0.0248   | 1.35e-05 | 0.000434% |
| OTU_5941  | True  | OD1    | 7.13e-05 | 0.00649% | 0.0 | 1 | 0.00135  | 0.00031  | 8.04e-05 | 0.000202 | 0.00646%  |
| L148      | False | OD1    | 7.04e-05 | 0.00642% | 0.0 | 1 | 0.00355  | 0.00061  | 0.000174 | 9.79e-05 | 0.00314%  |
| OTU_314   | True  | koll11 | 6.93e-05 | 0.00631% | 0.0 | 1 | 0.0104   | 0.000474 | 0.000705 | 4.72e-05 | 0.00151%  |
| OTU_2703  | True  | koll11 | 6.9e-05  | 0.00628% | 0.0 | 1 | 0.0141   | 0.00172  | 0.000941 | 6.91e-05 | 0.00221%  |
| L1853     | False | OD1    | 6.86e-05 | 0.00625% | 0.0 | 1 | 0.00858  | 0.00132  | 0.000514 | 2.93e-05 | 0.000937% |
| OTU_8447  | True  | ABY1   | 6.72e-05 | 0.00612% | 0.0 | 1 | 0.000726 | 0.00753  | 0.0137   | 0.00016  | 0.00513%  |
| L1655     | False | OD1    | 6.72e-05 | 0.00612% | 0.0 | 1 | 0.0188   | 0.00413  | 0.00234  | 4.84e-05 | 0.00155%  |
| L942      | False | koll11 | 6.72e-05 | 0.00612% | 0.0 | 1 | 0.221    | 0.0247   | 0.0368   | 1.37e-05 | 0.000438% |
| L792      | False | OP3    | 6.61e-05 | 0.00602% | 0.0 | 1 | 0.0478   | 0.00474  | 0.0107   | 4.87e-05 | 0.00156%  |
| OTU_6197  | True  | OD1    | 6.59e-05 | 0.006%   | 0.0 | 1 | 0.00398  | 0.00022  | 0.00058  | 0.000113 | 0.00361%  |
| L766      | False | OP3    | 6.58e-05 | 0.006%   | 0.0 | 1 | 0.0548   | 0.00533  | 0.0117   | 4.12e-05 | 0.00132%  |
| L1011     | False | koll11 | 6.55e-05 | 0.00597% | 0.0 | 1 | 0.0703   | 0.0079   | 0.0116   | 1.39e-05 | 0.000445% |
| L1167     | False | koll11 | 6.52e-05 | 0.00594% | 0.0 | 1 | 0.0124   | 0.00122  | 0.00139  | 3.99e-05 | 0.00128%  |
| OTU_8254  | True  | OD1    | 6.51e-05 | 0.00593% | 0.0 | 1 | 0.000906 | 4.94e-05 | 1.93e-05 | 9.51e-05 | 0.00305%  |
| L733      | False | PBS-25 | 6.48e-05 | 0.0059%  | 0.0 | 1 | 0.0234   | 0.00227  | 0.00269  | 6.58e-05 | 0.00211%  |
| L389      | False | ABY1   | 6.42e-05 | 0.00585% | 0.0 | 1 | 0.0133   | 0.00266  | 0.00139  | 7.37e-05 | 0.00236%  |
| OTU_10802 | True  | OP11-4 | 6.28e-05 | 0.00572% | 0.0 | 1 | 0.00197  | 0.000126 | 1.69e-05 | 6.96e-05 | 0.00223%  |
| L271      | False | OD1    | 6.23e-05 | 0.00567% | 0.0 | 1 | 0.00549  | 0.00299  | 0.000973 | 0.000223 | 0.00714%  |
| OTU_7960  | True  | OD1    | 6.18e-05 | 0.00563% | 0.0 | 1 | 0.00101  | 1.33e-05 | 2.05e-05 | 9.61e-05 | 0.00308%  |
| L260      | False | OD1    | 6.17e-05 | 0.00562% | 0.0 | 1 | 0.0148   | 0.0102   | 0.00477  | 0.000319 | 0.0102%   |
| L81       | False | ABY1   | 6.16e-05 | 0.00561% | 0.0 | 1 | 0.0261   | 0.00817  | 0.00278  | 4.36e-05 | 0.0014%   |

|           |       |        |          |          |     |   |          |          |          |          |           |
|-----------|-------|--------|----------|----------|-----|---|----------|----------|----------|----------|-----------|
| OTU_8880  | True  | ABY1   | 6.15e-05 | 0.0056%  | 0.0 | 1 | 0.00277  | 0.000153 | 1.24e-06 | 8.16e-05 | 0.00261%  |
| L1309     | False | OD1    | 6.14e-05 | 0.00559% | 0.0 | 1 | 0.00599  | 0.000399 | 0.000842 | 8.38e-05 | 0.00268%  |
| OTU_7795  | True  | ABY1   | 6.07e-05 | 0.00553% | 0.0 | 1 | 1.33e-05 | 0.00531  | 0.00631  | 9.97e-05 | 0.00319%  |
| L512      | False | OP11-3 | 6.04e-05 | 0.0055%  | 0.0 | 1 | 0.00202  | 8.71e-05 | 7.23e-05 | 0.000131 | 0.00418%  |
| L28       | False | OD1    | 6.03e-05 | 0.00549% | 0.0 | 1 | 0.154    | 0.155    | 0.0975   | 0.000684 | 0.0219%   |
| OTU_8200  | True  | ABY1   | 6e-05    | 0.00546% | 0.0 | 1 | 0.00189  | 6.43e-05 | 6.92e-06 | 7.08e-05 | 0.00227%  |
| OTU_6128  | True  | ZB2    | 5.95e-05 | 0.00542% | 0.0 | 1 | 0.00496  | 0.0006   | 0.000297 | 9.09e-05 | 0.00291%  |
| L481      | False | OP11-4 | 5.93e-05 | 0.0054%  | 0.0 | 1 | 0.0261   | 0.00383  | 0.0031   | 5.3e-05  | 0.0017%   |
| L951      | False | koll11 | 5.89e-05 | 0.00537% | 0.0 | 1 | 0.0304   | 0.00225  | 0.00504  | 3.7e-05  | 0.00119%  |
| L184      | False | SM2F11 | 5.77e-05 | 0.00526% | 0.0 | 1 | 0.00897  | 0.00166  | 0.000263 | 3.74e-05 | 0.0012%   |
| OTU_260   | True  | koll11 | 5.61e-05 | 0.00511% | 0.0 | 1 | 0.02     | 0.00139  | 0.00111  | 3.83e-05 | 0.00123%  |
| L63       | False | ABY1   | 5.61e-05 | 0.00511% | 0.0 | 1 | 0.00124  | 0.0493   | 0.022    | 7.35e-05 | 0.00235%  |
| L789      | False | OP3    | 5.57e-05 | 0.00507% | 0.0 | 1 | 0.0495   | 0.0049   | 0.0108   | 4.02e-05 | 0.00129%  |
| L47       | False | OD1    | 5.55e-05 | 0.00506% | 0.0 | 1 | 0.0496   | 0.11     | 0.0581   | 0.00027  | 0.00866%  |
| L480      | False | OP11-4 | 5.55e-05 | 0.00506% | 0.0 | 1 | 0.0267   | 0.00388  | 0.00315  | 4.66e-05 | 0.00149%  |
| OTU_7384  | True  | ABY1   | 5.52e-05 | 0.00503% | 0.0 | 1 | 4.16e-05 | 0.0104   | 0.0076   | 9.18e-05 | 0.00294%  |
| L1842     | False | OD1    | 5.49e-05 | 0.005%   | 0.0 | 1 | 0.00328  | 0.000538 | 0.000632 | 6.4e-05  | 0.00205%  |
| OTU_6068  | True  | OD1    | 5.48e-05 | 0.00499% | 0.0 | 1 | 0.00166  | 3.93e-05 | 7.45e-06 | 7.57e-05 | 0.00242%  |
| L623      | False | PBS-25 | 5.46e-05 | 0.00498% | 0.0 | 1 | 0.0115   | 0.00166  | 0.000552 | 2.48e-05 | 0.000796% |
| L767      | False | OP3    | 5.46e-05 | 0.00497% | 0.0 | 1 | 0.0546   | 0.00533  | 0.0117   | 3.43e-05 | 0.0011%   |
| L1594     | False | OD1    | 5.32e-05 | 0.00484% | 0.0 | 1 | 0.000249 | 0.00642  | 0.00413  | 0.000125 | 0.00401%  |
| OTU_6646  | True  | ZB2    | 5.31e-05 | 0.00483% | 0.0 | 1 | 2.51e-05 | 0.00534  | 0.00602  | 9.11e-05 | 0.00292%  |
| L366      | False | ABY1   | 5.3e-05  | 0.00482% | 0.0 | 1 | 0.00569  | 0.00046  | 0.000102 | 3.63e-05 | 0.00116%  |
| L320      | False | OD1    | 5.27e-05 | 0.0048%  | 0.0 | 1 | 0.0128   | 0.00125  | 0.00107  | 3.42e-05 | 0.0011%   |
| OTU_6705  | True  | ZB2    | 5.25e-05 | 0.00478% | 0.0 | 1 | 1.36e-05 | 0.00179  | 0.00585  | 4.52e-05 | 0.00145%  |
| L1543     | False | ZB2    | 5.22e-05 | 0.00475% | 0.0 | 1 | 0.0264   | 0.00367  | 0.00277  | 4.24e-05 | 0.00136%  |
| L1402     | False | ZB2    | 5.21e-05 | 0.00474% | 0.0 | 1 | 0.00297  | 0.0635   | 0.0306   | 0.000113 | 0.00363%  |
| L1412     | False | ZB2    | 5.2e-05  | 0.00474% | 0.0 | 1 | 0.00111  | 0.031    | 0.071    | 0.000101 | 0.00323%  |
| OTU_7221  | True  | ABY1   | 5.18e-05 | 0.00472% | 0.0 | 1 | 0.00598  | 0.000237 | 9.9e-05  | 3.67e-05 | 0.00118%  |
| L1855     | False | OD1    | 5.09e-05 | 0.00464% | 0.0 | 1 | 0.00794  | 0.00129  | 0.000514 | 2.6e-05  | 0.000832% |
| L1426     | False | OD1    | 5.08e-05 | 0.00463% | 0.0 | 1 | 0.0263   | 0.0839   | 0.12     | 9.2e-05  | 0.00295%  |
| L579      | False | PRR-12 | 5.02e-05 | 0.00457% | 0.0 | 1 | 0.0148   | 0.00148  | 0.000984 | 4.2e-05  | 0.00135%  |
| L511      | False | OP11   | 5e-05    | 0.00456% | 0.0 | 1 | 0.00298  | 0.000143 | 8.33e-05 | 7.35e-05 | 0.00236%  |
| L89       | False | ABY1   | 4.98e-05 | 0.00454% | 0.0 | 1 | 0.0241   | 0.00802  | 0.00276  | 3.86e-05 | 0.00124%  |
| L1500     | False | ZB2    | 4.91e-05 | 0.00448% | 0.0 | 1 | 0.000318 | 0.0141   | 0.00774  | 0.00025  | 0.00799%  |
| L1005     | False | koll11 | 4.91e-05 | 0.00447% | 0.0 | 1 | 0.09     | 0.00992  | 0.0165   | 9.16e-06 | 0.000293% |
| L1444     | False | ZB2    | 4.86e-05 | 0.00443% | 0.0 | 1 | 0.00186  | 0.0213   | 0.0297   | 5.59e-05 | 0.00179%  |
| L46       | False | OD1    | 4.77e-05 | 0.00435% | 0.0 | 1 | 0.0523   | 0.11     | 0.0582   | 0.000245 | 0.00785%  |
| L952      | False | koll11 | 4.75e-05 | 0.00433% | 0.0 | 1 | 0.0298   | 0.00192  | 0.00494  | 3.09e-05 | 0.000991% |
| L760      | False | OP3    | 4.75e-05 | 0.00432% | 0.0 | 1 | 0.0573   | 0.00544  | 0.0118   | 3.03e-05 | 0.000969% |
| L1459     | False | ZB2    | 4.6e-05  | 0.00419% | 0.0 | 1 | 0.0      | 0.000294 | 0.00226  | 0.000104 | 0.00332%  |
| L809      | False | OP3    | 4.6e-05  | 0.00419% | 0.0 | 1 | 0.0353   | 0.00348  | 0.00705  | 3.78e-05 | 0.00121%  |
| L12       | False | OD1    | 4.58e-05 | 0.00417% | 0.0 | 1 | 0.00181  | 0.000129 | 6.93e-06 | 5.87e-05 | 0.00188%  |
| L605      | False | PRR-12 | 4.55e-05 | 0.00414% | 0.0 | 1 | 0.002    | 3.67e-06 | 0.0      | 5.23e-05 | 0.00168%  |
| L93       | False | ABY1   | 4.54e-05 | 0.00414% | 0.0 | 1 | 0.0222   | 0.00478  | 0.00115  | 2.42e-05 | 0.000776% |
| L1791     | False | OD1    | 4.49e-05 | 0.00409% | 0.0 | 1 | 0.00296  | 0.000564 | 0.00035  | 4.81e-05 | 0.00154%  |
| L1661     | False | OD1    | 4.48e-05 | 0.00408% | 0.0 | 1 | 0.011    | 0.00184  | 0.00153  | 4.61e-05 | 0.00148%  |
| OTU_5604  | True  | OD1    | 4.42e-05 | 0.00403% | 0.0 | 1 | 0.0151   | 0.00162  | 0.000144 | 1.76e-05 | 0.000563% |
| L800      | False | OP3    | 4.39e-05 | 0.004%   | 0.0 | 1 | 0.0463   | 0.0046   | 0.0106   | 3.34e-05 | 0.00107%  |
| L1092     | False | koll11 | 4.38e-05 | 0.00399% | 0.0 | 1 | 0.0104   | 0.00104  | 0.00237  | 4.96e-05 | 0.00159%  |
| OTU_6570  | True  | SM2F11 | 4.34e-05 | 0.00395% | 0.0 | 1 | 0.00188  | 2.64e-05 | 1.33e-06 | 4.19e-05 | 0.00134%  |
| L1567     | False | ZB2    | 4.32e-05 | 0.00394% | 0.0 | 1 | 0.00312  | 0.000439 | 0.000749 | 5.84e-05 | 0.00187%  |
| L233      | False | ABY1   | 4.3e-05  | 0.00392% | 0.0 | 1 | 0.00568  | 0.000301 | 0.000313 | 5.21e-05 | 0.00167%  |
| L359      | False | OD1    | 4.3e-05  | 0.00391% | 0.0 | 1 | 0.00717  | 0.000772 | 0.000271 | 4.66e-05 | 0.00149%  |
| L488      | False | OP11-4 | 4.27e-05 | 0.00389% | 0.0 | 1 | 0.0084   | 0.0014   | 0.000917 | 3.94e-05 | 0.00126%  |
| L300      | False | ABY1   | 4.27e-05 | 0.00389% | 0.0 | 1 | 0.000808 | 0.0112   | 0.00746  | 9.1e-05  | 0.00292%  |
| L597      | False | PRR-12 | 4.26e-05 | 0.00388% | 0.0 | 1 | 0.00427  | 0.000308 | 0.000116 | 3.82e-05 | 0.00123%  |
| L1885     | False | OD1    | 4.25e-05 | 0.00387% | 0.0 | 1 | 0.00434  | 0.000686 | 0.000229 | 3.29e-05 | 0.00105%  |
| OTU_10771 | True  | OP11-3 | 4.24e-05 | 0.00386% | 0.0 | 1 | 0.00158  | 0.0      | 0.0      | 9.3e-05  | 0.00298%  |
| L648      | False | koll11 | 4.23e-05 | 0.00386% | 0.0 | 1 | 0.017    | 0.00244  | 0.00477  | 2.69e-05 | 0.000861% |
| L984      | False | koll11 | 4.22e-05 | 0.00384% | 0.0 | 1 | 0.00636  | 0.0007   | 0.000206 | 6.12e-05 | 0.00196%  |
| OTU_172   | True  | PBS-25 | 4.19e-05 | 0.00382% | 0.0 | 1 | 0.0146   | 0.00203  | 0.00355  | 6.85e-05 | 0.00219%  |
| L1596     | False | OD1    | 4.16e-05 | 0.00379% | 0.0 | 1 | 0.000249 | 0.00641  | 0.00347  | 8.76e-05 | 0.00281%  |
| L278      | False | ABY1   | 4.15e-05 | 0.00378% | 0.0 | 1 | 0.00357  | 0.000513 | 9.59e-05 | 4.89e-05 | 0.00157%  |

|           |       |                |          |          |     |   |          |          |          |          |           |
|-----------|-------|----------------|----------|----------|-----|---|----------|----------|----------|----------|-----------|
| L1831     | False | OD1            | 4.12e-05 | 0.00375% | 0.0 | 1 | 0.0117   | 0.00176  | 0.00184  | 3.95e-05 | 0.00126%  |
| OTU_4910  | True  | OD1            | 4.07e-05 | 0.00371% | 0.0 | 1 | 0.000581 | 4.26e-05 | 0.000136 | 0.000144 | 0.00461%  |
| L140      | False | ABY1           | 4.07e-05 | 0.00371% | 0.0 | 1 | 0.0049   | 0.0203   | 0.00712  | 0.000258 | 0.00825%  |
| L1112     | False | koll11         | 4.07e-05 | 0.00371% | 0.0 | 1 | 0.0276   | 0.00347  | 0.00297  | 1.86e-05 | 0.000596% |
| L585      | False | PRR-12         | 4.03e-05 | 0.00367% | 0.0 | 1 | 0.0138   | 0.00144  | 0.000827 | 3.72e-05 | 0.00119%  |
| L64       | False | ABY1           | 3.97e-05 | 0.00361% | 0.0 | 1 | 0.00123  | 0.0472   | 0.0184   | 5.84e-05 | 0.00187%  |
| OTU_7053  | True  | ABY1           | 3.95e-05 | 0.0036%  | 0.0 | 1 | 0.00566  | 0.000751 | 0.000239 | 6.22e-05 | 0.00199%  |
| L1546     | False | ZB2            | 3.94e-05 | 0.00359% | 0.0 | 1 | 0.0242   | 0.00344  | 0.00226  | 3.31e-05 | 0.00106%  |
| L624      | False | PBS-25         | 3.94e-05 | 0.00358% | 0.0 | 1 | 0.00711  | 0.00151  | 0.000451 | 3.12e-05 | 0.001%    |
| OTU_7302  | True  | ABY1           | 3.93e-05 | 0.00358% | 0.0 | 1 | 0.00487  | 0.00125  | 0.00013  | 7.35e-05 | 0.00236%  |
| L1677     | False | OD1            | 3.91e-05 | 0.00356% | 0.0 | 1 | 0.00388  | 0.000373 | 0.000367 | 6.68e-05 | 0.00214%  |
| L1827     | False | OD1            | 3.89e-05 | 0.00355% | 0.0 | 1 | 0.0131   | 0.00207  | 0.00192  | 3.81e-05 | 0.00122%  |
| L794      | False | OP3            | 3.87e-05 | 0.00352% | 0.0 | 1 | 0.047    | 0.00464  | 0.0106   | 2.86e-05 | 0.000915% |
| L192      | False | ABY1           | 3.86e-05 | 0.00352% | 0.0 | 1 | 0.0207   | 0.00479  | 0.00385  | 4.32e-05 | 0.00138%  |
| OTU_6344  | True  | OD1            | 3.85e-05 | 0.00351% | 0.0 | 1 | 0.00274  | 0.000474 | 6.59e-05 | 4.66e-05 | 0.00149%  |
| L628      | False | PBS-25         | 3.84e-05 | 0.0035%  | 0.0 | 1 | 0.00341  | 0.000157 | 0.000101 | 5.55e-05 | 0.00178%  |
| OTU_7971  | True  | OD1            | 3.83e-05 | 0.00349% | 0.0 | 1 | 0.00105  | 0.000137 | 4.09e-05 | 7.55e-05 | 0.00242%  |
| L807      | False | OP3            | 3.82e-05 | 0.00348% | 0.0 | 1 | 0.0435   | 0.00379  | 0.00904  | 2.97e-05 | 0.000951% |
| L1230     | False | [Acetothermia] | 3.8e-05  | 0.00347% | 0.0 | 1 | 0.000813 | 3.22e-05 | 0.0      | 8.29e-05 | 0.00266%  |
| L1689     | False | OD1            | 3.8e-05  | 0.00346% | 0.0 | 1 | 0.00947  | 0.00118  | 0.000352 | 1.76e-05 | 0.000563% |
| L1843     | False | OD1            | 3.72e-05 | 0.00339% | 0.0 | 1 | 0.00315  | 0.000535 | 0.000629 | 4.58e-05 | 0.00147%  |
| L1027     | False | koll11         | 3.7e-05  | 0.00337% | 0.0 | 1 | 0.0407   | 0.00445  | 0.00763  | 1.21e-05 | 0.000389% |
| OTU_186   | True  | koll11         | 3.67e-05 | 0.00334% | 0.0 | 1 | 0.0236   | 0.00329  | 0.00244  | 2.01e-05 | 0.000645% |
| L1806     | False | OD1            | 3.64e-05 | 0.00331% | 0.0 | 1 | 0.0142   | 0.00151  | 0.000588 | 2.68e-05 | 0.00086%  |
| L321      | False | OD1            | 3.62e-05 | 0.0033%  | 0.0 | 1 | 0.0122   | 0.00122  | 0.00107  | 2.42e-05 | 0.000774% |
| L97       | False | ABY1           | 3.61e-05 | 0.00329% | 0.0 | 1 | 0.0133   | 0.00241  | 0.00043  | 2.52e-05 | 0.000809% |
| L1177     | False | koll11         | 3.6e-05  | 0.00328% | 0.0 | 1 | 0.0101   | 0.000799 | 0.00129  | 2.25e-05 | 0.000722% |
| OTU_242   | True  | PBS-25         | 3.59e-05 | 0.00327% | 0.0 | 1 | 0.0147   | 0.00127  | 0.00106  | 5.14e-05 | 0.00165%  |
| OTU_8054  | True  | ABY1           | 3.58e-05 | 0.00326% | 0.0 | 1 | 0.0015   | 5.64e-05 | 2.4e-05  | 6.29e-05 | 0.00201%  |
| OTU_281   | True  | koll11         | 3.56e-05 | 0.00324% | 0.0 | 1 | 0.00378  | 0.000365 | 0.000508 | 5.72e-05 | 0.00183%  |
| OTU_7992  | True  | TM7-1          | 3.46e-05 | 0.00315% | 0.0 | 1 | 2.86e-05 | 0.0112   | 0.0087   | 6.57e-05 | 0.00211%  |
| OTU_183   | True  | koll11         | 3.45e-05 | 0.00314% | 0.0 | 1 | 0.00884  | 0.00165  | 0.000718 | 6.61e-05 | 0.00212%  |
| OTU_6978  | True  | ZB2            | 3.44e-05 | 0.00314% | 0.0 | 1 | 0.00253  | 0.000261 | 2.26e-05 | 4.09e-05 | 0.00131%  |
| OTU_83    | True  | Mb-NB09        | 3.4e-05  | 0.00309% | 0.0 | 1 | 0.000655 | 0.000133 | 4.67e-05 | 7.96e-05 | 0.00255%  |
| L1716     | False | Mb-NB09        | 3.38e-05 | 0.00308% | 0.0 | 1 | 0.00271  | 0.000279 | 0.000114 | 6.01e-05 | 0.00192%  |
| L261      | False | OD1            | 3.36e-05 | 0.00307% | 0.0 | 1 | 0.0145   | 0.008    | 0.00345  | 0.000117 | 0.00375%  |
| L1335     | False | ZB2            | 3.32e-05 | 0.00302% | 0.0 | 1 | 0.00371  | 0.000763 | 0.00034  | 4.05e-05 | 0.0013%   |
| OTU_7002  | True  | ZB2            | 3.3e-05  | 0.00301% | 0.0 | 1 | 0.000898 | 0.0      | 0.0      | 6.83e-05 | 0.00219%  |
| L333      | False | OD1            | 3.3e-05  | 0.003%   | 0.0 | 1 | 0.00169  | 0.000178 | 6.94e-05 | 4.7e-05  | 0.0015%   |
| L58       | False | ABY1           | 3.29e-05 | 0.003%   | 0.0 | 1 | 0.00395  | 0.0505   | 0.0222   | 5.77e-05 | 0.00185%  |
| L1110     | False | koll11         | 3.28e-05 | 0.00299% | 0.0 | 1 | 0.0382   | 0.00418  | 0.00461  | 1.08e-05 | 0.000347% |
| L803      | False | OP3            | 3.28e-05 | 0.00299% | 0.0 | 1 | 0.0435   | 0.00379  | 0.0094   | 2.64e-05 | 0.000844% |
| OTU_303   | True  | koll11         | 3.25e-05 | 0.00296% | 0.0 | 1 | 0.00975  | 0.00092  | 0.00203  | 3.93e-05 | 0.00126%  |
| L1697     | False | Mb-NB09        | 3.23e-05 | 0.00295% | 0.0 | 1 | 0.00103  | 0.000183 | 5.56e-05 | 5.07e-05 | 0.00163%  |
| L1561     | False | ZB2            | 3.22e-05 | 0.00294% | 0.0 | 1 | 0.0057   | 0.000665 | 0.000297 | 4.85e-05 | 0.00155%  |
| L845      | False | koll11         | 3.2e-05  | 0.00292% | 0.0 | 1 | 0.0352   | 0.0037   | 0.00461  | 2.05e-05 | 0.000656% |
| OTU_5994  | True  | ZB2            | 3.17e-05 | 0.00289% | 0.0 | 1 | 0.000434 | 0.0468   | 0.0235   | 6.74e-05 | 0.00216%  |
| L660      | False | koll11         | 3.16e-05 | 0.00288% | 0.0 | 1 | 0.00373  | 0.000239 | 0.000608 | 4.24e-05 | 0.00136%  |
| L1536     | False | OD1            | 3.13e-05 | 0.00285% | 0.0 | 1 | 0.00458  | 0.000321 | 0.000696 | 4.52e-05 | 0.00145%  |
| L186      | False | SM2F11         | 3.13e-05 | 0.00285% | 0.0 | 1 | 0.00602  | 0.00116  | 0.000232 | 3.88e-05 | 0.00124%  |
| L45       | False | OD1            | 3.08e-05 | 0.0028%  | 0.0 | 1 | 0.113    | 0.151    | 0.0935   | 0.000436 | 0.014%    |
| OTU_6780  | True  | ZB2            | 3.08e-05 | 0.0028%  | 0.0 | 1 | 0.0049   | 0.000601 | 0.00401  | 0.000104 | 0.00334%  |
| L1544     | False | ZB2            | 3.07e-05 | 0.0028%  | 0.0 | 1 | 0.0247   | 0.00345  | 0.00227  | 2.48e-05 | 0.000795% |
| OTU_5705  | True  | OD1            | 3.07e-05 | 0.0028%  | 0.0 | 1 | 0.00949  | 0.000329 | 0.00123  | 2.96e-05 | 0.000948% |
| L391      | False | ABY1           | 3.04e-05 | 0.00277% | 0.0 | 1 | 0.00404  | 0.000194 | 0.000173 | 2.64e-05 | 0.000845% |
| L842      | False | OP3            | 3.04e-05 | 0.00277% | 0.0 | 1 | 0.0618   | 0.00593  | 0.0078   | 1.41e-05 | 0.000451% |
| OTU_689   | True  | koll11         | 3.02e-05 | 0.00276% | 0.0 | 1 | 0.00412  | 0.00044  | 0.00104  | 3.17e-05 | 0.00102%  |
| L811      | False | OP3            | 3.01e-05 | 0.00274% | 0.0 | 1 | 0.0352   | 0.00345  | 0.00705  | 2.48e-05 | 0.000793% |
| L1413     | False | ZB2            | 2.99e-05 | 0.00273% | 0.0 | 1 | 0.000574 | 0.031    | 0.0701   | 5.75e-05 | 0.00184%  |
| L1712     | False | Mb-NB09        | 2.99e-05 | 0.00272% | 0.0 | 1 | 0.00388  | 0.000522 | 0.000178 | 4.31e-05 | 0.00138%  |
| L646      | False | koll11         | 2.98e-05 | 0.00272% | 0.0 | 1 | 0.017    | 0.00244  | 0.0049   | 1.9e-05  | 0.000609% |
| OTU_62    | True  | ZB2            | 2.96e-05 | 0.0027%  | 0.0 | 1 | 0.000105 | 0.014    | 0.0077   | 0.000136 | 0.00436%  |
| L32       | False | ABY1           | 2.96e-05 | 0.0027%  | 0.0 | 1 | 0.00151  | 2.88e-05 | 2.26e-05 | 3.95e-05 | 0.00127%  |
| OTU_180   | True  | koll11         | 2.96e-05 | 0.00269% | 0.0 | 1 | 0.00631  | 0.000815 | 0.000432 | 4.37e-05 | 0.0014%   |
| OTU_10861 | True  | OP11-4         | 2.95e-05 | 0.00268% | 0.0 | 1 | 0.00378  | 0.000517 | 0.000706 | 4.34e-05 | 0.00139%  |

|           |       |         |          |          |     |   |          |          |          |          |           |
|-----------|-------|---------|----------|----------|-----|---|----------|----------|----------|----------|-----------|
| L972      | False | koll11  | 2.9e-05  | 0.00265% | 0.0 | 1 | 0.174    | 0.0201   | 0.028    | 6.08e-06 | 0.000195% |
| L1004     | False | koll11  | 2.88e-05 | 0.00263% | 0.0 | 1 | 0.128    | 0.0141   | 0.0211   | 4.87e-06 | 0.000156% |
| L59       | False | ABY1    | 2.87e-05 | 0.00261% | 0.0 | 1 | 0.00169  | 0.0496   | 0.0222   | 3.97e-05 | 0.00127%  |
| L347      | False | ABY1    | 2.81e-05 | 0.00256% | 0.0 | 1 | 0.00421  | 0.0004   | 0.000282 | 3.12e-05 | 0.000998% |
| L613      | False | BD4-9   | 2.8e-05  | 0.00255% | 0.0 | 1 | 0.00075  | 1.39e-05 | 0.0      | 5.01e-05 | 0.0016%   |
| L92       | False | ABY1    | 2.78e-05 | 0.00253% | 0.0 | 1 | 0.023    | 0.00489  | 0.00116  | 1.5e-05  | 0.00048%  |
| OTU_2037  | True  | koll11  | 2.77e-05 | 0.00253% | 0.0 | 1 | 0.0104   | 0.00114  | 0.00116  | 3.29e-05 | 0.00106%  |
| L874      | False | koll11  | 2.75e-05 | 0.00251% | 0.0 | 1 | 0.0183   | 0.00211  | 0.00369  | 1.57e-05 | 0.000502% |
| L1550     | False | ZB2     | 2.75e-05 | 0.0025%  | 0.0 | 1 | 0.0213   | 0.00308  | 0.00213  | 2.61e-05 | 0.000836% |
| L523      | False | OP11    | 2.73e-05 | 0.00248% | 0.0 | 1 | 0.000965 | 5.63e-05 | 1.1e-05  | 4.83e-05 | 0.00155%  |
| OTU_85    | True  | OD1     | 2.7e-05  | 0.00246% | 0.0 | 1 | 0.0003   | 3.8e-05  | 0.0      | 7.99e-05 | 0.00256%  |
| OTU_7179  | True  | OD1     | 2.7e-05  | 0.00246% | 0.0 | 1 | 0.000436 | 0.0      | 0.0      | 5.14e-05 | 0.00165%  |
| OTU_3932  | True  | SJA-4   | 2.69e-05 | 0.00245% | 0.0 | 1 | 0.00169  | 0.0      | 0.0      | 6.31e-05 | 0.00202%  |
| L1593     | False | OD1     | 2.69e-05 | 0.00245% | 0.0 | 1 | 0.000249 | 0.00655  | 0.00413  | 5.86e-05 | 0.00188%  |
| OTU_9009  | True  | Mb-NB09 | 2.68e-05 | 0.00245% | 0.0 | 1 | 0.000989 | 7.16e-06 | 2.68e-05 | 6.86e-05 | 0.0022%   |
| L730      | False | PBS-25  | 2.68e-05 | 0.00245% | 0.0 | 1 | 0.00829  | 0.000654 | 0.000908 | 3.9e-05  | 0.00125%  |
| OTU_6723  | True  | OD1     | 2.65e-05 | 0.00242% | 0.0 | 1 | 7.37e-07 | 0.00132  | 0.000319 | 8.13e-05 | 0.0026%   |
| L1097     | False | koll11  | 2.65e-05 | 0.00241% | 0.0 | 1 | 0.0104   | 0.00142  | 0.00324  | 4.09e-05 | 0.00131%  |
| OTU_8031  | True  | ABY1    | 2.64e-05 | 0.00241% | 0.0 | 1 | 0.00474  | 0.00156  | 0.000421 | 4e-05    | 0.00128%  |
| OTU_214   | True  | PBS-25  | 2.64e-05 | 0.00241% | 0.0 | 1 | 0.00681  | 0.000276 | 0.0018   | 3.71e-05 | 0.00119%  |
| L1872     | False | OD1     | 2.64e-05 | 0.0024%  | 0.0 | 1 | 0.00126  | 0.000384 | 6.74e-05 | 5.21e-05 | 0.00167%  |
| OTU_6683  | True  | ZB2     | 2.63e-05 | 0.0024%  | 0.0 | 1 | 0.00112  | 2.28e-05 | 7.83e-05 | 4.38e-05 | 0.0014%   |
| L816      | False | PBS-25  | 2.63e-05 | 0.00239% | 0.0 | 1 | 0.0205   | 0.00192  | 0.00236  | 2.18e-05 | 0.000698% |
| OTU_258   | True  | koll11  | 2.61e-05 | 0.00238% | 0.0 | 1 | 0.0088   | 0.00153  | 0.00102  | 3.08e-05 | 0.000987% |
| L725      | False | PBS-25  | 2.58e-05 | 0.00235% | 0.0 | 1 | 0.0324   | 0.0032   | 0.00375  | 2.44e-05 | 0.000782% |
| L1456     | False | ZB2     | 2.56e-05 | 0.00233% | 0.0 | 1 | 0.000383 | 0.00491  | 0.00923  | 3.76e-05 | 0.0012%   |
| OTU_8251  | True  | Mb-NB09 | 2.56e-05 | 0.00233% | 0.0 | 1 | 0.00271  | 7.87e-05 | 0.000102 | 3.59e-05 | 0.00115%  |
| OTU_9036  | True  | Mb-NB09 | 2.55e-05 | 0.00232% | 0.0 | 1 | 0.000691 | 0.0      | 0.0      | 5.59e-05 | 0.00179%  |
| L193      | False | ABY1    | 2.54e-05 | 0.00232% | 0.0 | 1 | 0.00733  | 0.00307  | 0.0023   | 9.43e-05 | 0.00302%  |
| L323      | False | OD1     | 2.54e-05 | 0.00231% | 0.0 | 1 | 0.00556  | 0.000399 | 0.000181 | 1.66e-05 | 0.000531% |
| L322      | False | OD1     | 2.53e-05 | 0.00231% | 0.0 | 1 | 0.00564  | 0.000399 | 0.00019  | 1.62e-05 | 0.000517% |
| L1658     | False | OD1     | 2.53e-05 | 0.0023%  | 0.0 | 1 | 0.00773  | 0.00226  | 0.000804 | 4.53e-05 | 0.00145%  |
| OTU_8240  | True  | ABY1    | 2.53e-05 | 0.0023%  | 0.0 | 1 | 0.00177  | 0.000307 | 0.000581 | 9.91e-05 | 0.00317%  |
| OTU_8751  | True  | OD1     | 2.51e-05 | 0.00229% | 0.0 | 1 | 0.00359  | 0.00022  | 0.000749 | 4.31e-05 | 0.00138%  |
| OTU_2281  | True  | koll11  | 2.51e-05 | 0.00228% | 0.0 | 1 | 0.00295  | 5.65e-05 | 0.000354 | 3.91e-05 | 0.00125%  |
| L141      | False | ABY1    | 2.5e-05  | 0.00228% | 0.0 | 1 | 0.00204  | 0.0188   | 0.00683  | 9.58e-05 | 0.00307%  |
| L1512     | False | OD1     | 2.49e-05 | 0.00227% | 0.0 | 1 | 0.00567  | 0.000801 | 0.0053   | 8.02e-05 | 0.00257%  |
| L1312     | False | OD1     | 2.47e-05 | 0.00225% | 0.0 | 1 | 0.000644 | 0.000136 | 0.0      | 6.04e-05 | 0.00193%  |
| OTU_2093  | True  | GIF10   | 2.47e-05 | 0.00225% | 0.0 | 1 | 0.00305  | 0.000166 | 0.000141 | 3.92e-05 | 0.00126%  |
| L248      | False | ABY1    | 2.46e-05 | 0.00224% | 0.0 | 1 | 0.00658  | 0.00139  | 0.000179 | 2.73e-05 | 0.000875% |
| L1197     | False | koll11  | 2.46e-05 | 0.00224% | 0.0 | 1 | 0.00229  | 0.000142 | 0.000235 | 2.02e-05 | 0.000648% |
| L822      | False | PBS-25  | 2.45e-05 | 0.00223% | 0.0 | 1 | 0.0192   | 0.0018   | 0.00236  | 2.09e-05 | 0.00067%  |
| L403      | False | ABY1    | 2.44e-05 | 0.00222% | 0.0 | 1 | 0.00805  | 0.0024   | 0.00106  | 5.82e-05 | 0.00186%  |
| L1278     | False | TM7-3   | 2.43e-05 | 0.00221% | 0.0 | 1 | 0.00461  | 0.00027  | 0.000893 | 7.4e-05  | 0.00237%  |
| L424      | False | OP11    | 2.43e-05 | 0.00221% | 0.0 | 1 | 0.00269  | 0.000622 | 0.00209  | 0.000112 | 0.00357%  |
| L4        | False | ABY1    | 2.42e-05 | 0.00221% | 0.0 | 1 | 0.00262  | 0.000604 | 0.000162 | 3.37e-05 | 0.00108%  |
| L1365     | False | ZB2     | 2.42e-05 | 0.0022%  | 0.0 | 1 | 2.36e-06 | 0.00169  | 0.00166  | 6.63e-05 | 0.00212%  |
| OTU_8002  | True  | ABY1    | 2.41e-05 | 0.0022%  | 0.0 | 1 | 0.00139  | 2.16e-05 | 1.89e-05 | 5.29e-05 | 0.00169%  |
| L868      | False | koll11  | 2.41e-05 | 0.0022%  | 0.0 | 1 | 0.0191   | 0.00216  | 0.00371  | 1.25e-05 | 0.0004%   |
| L1683     | False | Mb-NB09 | 2.41e-05 | 0.00219% | 0.0 | 1 | 0.00307  | 0.0008   | 6.87e-05 | 4.56e-05 | 0.00146%  |
| OTU_7054  | True  | ABY1    | 2.41e-05 | 0.00219% | 0.0 | 1 | 0.0038   | 0.000396 | 9.49e-05 | 2.58e-05 | 0.000827% |
| OTU_10762 | True  | OP11-4  | 2.4e-05  | 0.00218% | 0.0 | 1 | 0.00117  | 0.000201 | 1.83e-05 | 2.82e-05 | 0.000904% |
| L1663     | False | OD1     | 2.39e-05 | 0.00218% | 0.0 | 1 | 0.00332  | 0.000489 | 6.59e-05 | 1.93e-05 | 0.000619% |
| OTU_49    | True  | OD1     | 2.39e-05 | 0.00217% | 0.0 | 1 | 0.000305 | 1.77e-05 | 0.0      | 4.96e-05 | 0.00159%  |
| OTU_4160  | True  | GIF10   | 2.38e-05 | 0.00217% | 0.0 | 1 | 0.000808 | 4.54e-07 | 0.0      | 5.02e-05 | 0.00161%  |
| L864      | False | koll11  | 2.38e-05 | 0.00217% | 0.0 | 1 | 0.0198   | 0.00222  | 0.00389  | 1.17e-05 | 0.000376% |
| L1523     | False | ZB2     | 2.38e-05 | 0.00217% | 0.0 | 1 | 0.00223  | 0.000274 | 0.000102 | 2.77e-05 | 0.000887% |
| L137      | False | OD1     | 2.38e-05 | 0.00217% | 0.0 | 1 | 0.00933  | 0.0362   | 0.0206   | 0.000108 | 0.00345%  |
| OTU_6129  | True  | SM2F11  | 2.37e-05 | 0.00216% | 0.0 | 1 | 0.00295  | 0.000492 | 3.11e-05 | 4.11e-05 | 0.00132%  |
| L1771     | False | OD1     | 2.37e-05 | 0.00216% | 0.0 | 1 | 0.00155  | 0.000112 | 7.25e-05 | 4.38e-05 | 0.0014%   |
| L1690     | False | OD1     | 2.36e-05 | 0.00215% | 0.0 | 1 | 0.00545  | 0.000635 | 0.000174 | 1.02e-05 | 0.000327% |
| OTU_7898  | True  | ABY1    | 2.36e-05 | 0.00215% | 0.0 | 1 | 1.62e-05 | 0.00262  | 0.00258  | 6.71e-05 | 0.00215%  |
| L1784     | False | OD1     | 2.35e-05 | 0.00214% | 0.0 | 1 | 0.00442  | 0.000814 | 0.00043  | 2.24e-05 | 0.000716% |
| L427      | False | OP11    | 2.34e-05 | 0.00213% | 0.0 | 1 | 0.00128  | 5.88e-05 | 0.000189 | 4.08e-05 | 0.00131%  |
| L535      | False | SBRH58  | 2.34e-05 | 0.00213% | 0.0 | 1 | 0.00161  | 6.35e-05 | 0.000116 | 5.64e-05 | 0.00181%  |

|           |       |          |          |          |     |   |          |          |          |          |           |
|-----------|-------|----------|----------|----------|-----|---|----------|----------|----------|----------|-----------|
| L1798     | False | OD1      | 2.33e-05 | 0.00213% | 0.0 | 1 | 0.0156   | 0.00154  | 0.000626 | 1.56e-05 | 0.0005%   |
| L297      | False | ABY1     | 2.32e-05 | 0.00212% | 0.0 | 1 | 0.00104  | 0.0113   | 0.00876  | 4.92e-05 | 0.00158%  |
| OTU_6014  | True  | SM2F11   | 2.32e-05 | 0.00211% | 0.0 | 1 | 0.00546  | 0.00116  | 0.000232 | 3.09e-05 | 0.000991% |
| L1558     | False | ZB2      | 2.31e-05 | 0.0021%  | 0.0 | 1 | 0.015    | 0.00175  | 0.00143  | 2.05e-05 | 0.000657% |
| OTU_633   | True  | koll11   | 2.3e-05  | 0.0021%  | 0.0 | 1 | 0.0183   | 0.00164  | 0.00218  | 1.37e-05 | 0.000439% |
| L815      | False | OP3      | 2.3e-05  | 0.00209% | 0.0 | 1 | 0.0218   | 0.00196  | 0.00236  | 1.68e-05 | 0.000538% |
| L1509     | False | OD1      | 2.3e-05  | 0.00209% | 0.0 | 1 | 0.00804  | 0.0014   | 0.00549  | 6.07e-05 | 0.00194%  |
| L94       | False | ABY1     | 2.28e-05 | 0.00207% | 0.0 | 1 | 0.0176   | 0.0041   | 0.00072  | 1.69e-05 | 0.000542% |
| L507      | False | OP11-4   | 2.28e-05 | 0.00207% | 0.0 | 1 | 0.00379  | 0.000519 | 0.000706 | 3.35e-05 | 0.00107%  |
| L649      | False | koll11   | 2.27e-05 | 0.00207% | 0.0 | 1 | 0.0167   | 0.00236  | 0.00459  | 1.44e-05 | 0.000461% |
| OTU_423   | True  | PBS-25   | 2.26e-05 | 0.00206% | 0.0 | 1 | 0.00673  | 0.00149  | 0.000451 | 1.99e-05 | 0.000639% |
| L1511     | False | OD1      | 2.25e-05 | 0.00205% | 0.0 | 1 | 0.00804  | 0.00107  | 0.0054   | 5.08e-05 | 0.00163%  |
| L485      | False | OP11-4   | 2.24e-05 | 0.00204% | 0.0 | 1 | 0.00197  | 0.000126 | 1.69e-05 | 2.48e-05 | 0.000795% |
| L175      | False | SM2F11   | 2.23e-05 | 0.00203% | 0.0 | 1 | 0.00188  | 0.000239 | 1.63e-05 | 3.19e-05 | 0.00102%  |
| OTU_5431  | True  | OD1      | 2.18e-05 | 0.00199% | 0.0 | 1 | 0.000642 | 3.06e-05 | 0.0      | 4.1e-05  | 0.00131%  |
| L974      | False | koll11   | 2.18e-05 | 0.00198% | 0.0 | 1 | 0.00633  | 0.000815 | 0.000432 | 3.2e-05  | 0.00103%  |
| OTU_3387  | True  | PBS-25   | 2.17e-05 | 0.00198% | 0.0 | 1 | 0.0019   | 0.0      | 0.0      | 6.15e-05 | 0.00197%  |
| L1336     | False | ZB2      | 2.17e-05 | 0.00198% | 0.0 | 1 | 0.00211  | 0.000168 | 0.000119 | 2.2e-05  | 0.000704% |
| OTU_7967  | True  | ABY1     | 2.17e-05 | 0.00197% | 0.0 | 1 | 0.00289  | 5.32e-05 | 3.63e-05 | 2.11e-05 | 0.000675% |
| L69       | False | ABY1     | 2.16e-05 | 0.00196% | 0.0 | 1 | 0.00013  | 0.00837  | 0.00694  | 3.9e-05  | 0.00125%  |
| OTU_6576  | True  | ZB2      | 2.13e-05 | 0.00194% | 0.0 | 1 | 0.000578 | 1.47e-05 | 0.0      | 3.06e-05 | 0.00098%  |
| OTU_8044  | True  | WCHB1    | 2.12e-05 | 0.00193% | 0.0 | 1 | 0.000619 | 1.94e-05 | 0.0      | 2.9e-05  | 0.00093%  |
| L520      | False | OP11-3   | 2.11e-05 | 0.00192% | 0.0 | 1 | 0.00165  | 0.0      | 0.0      | 4.36e-05 | 0.0014%   |
| L1720     | False | Mb-NB09  | 2.11e-05 | 0.00192% | 0.0 | 1 | 0.00455  | 0.000754 | 0.000968 | 3.28e-05 | 0.00105%  |
| L370      | False | OD1      | 2.1e-05  | 0.00191% | 0.0 | 1 | 0.00216  | 0.000332 | 2.69e-05 | 2.23e-05 | 0.000714% |
| L1790     | False | OD1      | 2.1e-05  | 0.00191% | 0.0 | 1 | 0.0034   | 0.000564 | 0.000357 | 1.79e-05 | 0.000573% |
| L1714     | False | Mb-NB09  | 2.09e-05 | 0.0019%  | 0.0 | 1 | 0.00327  | 0.000287 | 0.000137 | 2.95e-05 | 0.000945% |
| OTU_6061  | True  | ZB2      | 2.09e-05 | 0.0019%  | 0.0 | 1 | 2.97e-05 | 0.00196  | 0.000123 | 4.1e-05  | 0.00131%  |
| L309      | False | ABY1     | 2.09e-05 | 0.0019%  | 0.0 | 1 | 3.62e-05 | 0.00458  | 0.00397  | 2.31e-05 | 0.000741% |
| OTU_949   | True  | koll11   | 2.09e-05 | 0.0019%  | 0.0 | 1 | 0.00544  | 0.000751 | 0.000179 | 2.96e-05 | 0.000949% |
| L1836     | False | OD1      | 2.08e-05 | 0.0019%  | 0.0 | 1 | 0.00225  | 0.000449 | 0.000857 | 0.000133 | 0.00427%  |
| L1533     | False | OD1      | 2.07e-05 | 0.00189% | 0.0 | 1 | 3.99e-06 | 0.000457 | 0.00111  | 5.37e-05 | 0.00172%  |
| L812      | False | PBS-25   | 2.07e-05 | 0.00189% | 0.0 | 1 | 0.0134   | 0.00148  | 0.00469  | 3.52e-05 | 0.00113%  |
| OTU_9039  | True  | ABY1     | 2.05e-05 | 0.00187% | 0.0 | 1 | 0.0011   | 9.53e-06 | 3.57e-06 | 3.62e-05 | 0.00116%  |
| OTU_36    | True  | PBS-25   | 2.05e-05 | 0.00187% | 0.0 | 1 | 0.00332  | 0.000179 | 0.000241 | 4.88e-05 | 0.00156%  |
| OTU_8035  | True  | OD1      | 2.05e-05 | 0.00186% | 0.0 | 1 | 0.00168  | 0.00021  | 0.000483 | 9.5e-05  | 0.00304%  |
| OTU_927   | True  | PRR-12   | 2.03e-05 | 0.00185% | 0.0 | 1 | 0.00196  | 5.01e-05 | 1.6e-05  | 2.52e-05 | 0.000807% |
| OTU_7950  | True  | ABY1     | 2.02e-05 | 0.00184% | 0.0 | 1 | 0.00131  | 0.000243 | 0.000169 | 6.15e-05 | 0.00197%  |
| L1572     | False | ZB2      | 2.01e-05 | 0.00183% | 0.0 | 1 | 0.0019   | 0.000256 | 0.000611 | 4.66e-05 | 0.00149%  |
| OTU_7450  | True  | ABY1     | 2.01e-05 | 0.00183% | 0.0 | 1 | 0.00343  | 0.000608 | 0.000174 | 3.03e-05 | 0.000972% |
| L158      | False | ABY1     | 2e-05    | 0.00182% | 0.0 | 1 | 0.00278  | 0.000334 | 0.000101 | 2.08e-05 | 0.000668% |
| L393      | False | ABY1     | 2e-05    | 0.00182% | 0.0 | 1 | 0.00376  | 0.00017  | 0.000173 | 1.73e-05 | 0.000554% |
| L1793     | False | OD1      | 2e-05    | 0.00182% | 0.0 | 1 | 0.00205  | 0.000515 | 0.000331 | 3.88e-05 | 0.00124%  |
| OTU_380   | True  | koll11   | 1.99e-05 | 0.00182% | 0.0 | 1 | 0.00221  | 0.000322 | 4.11e-05 | 3.21e-05 | 0.00103%  |
| OTU_6571  | True  | ZB2      | 1.99e-05 | 0.00181% | 0.0 | 1 | 0.00237  | 0.0      | 3.51e-05 | 2.58e-05 | 0.000826% |
| OTU_216   | True  | koll11   | 1.99e-05 | 0.00181% | 0.0 | 1 | 0.00921  | 0.00121  | 0.00295  | 3.73e-05 | 0.00119%  |
| OTU_7951  | True  | ABY1     | 1.99e-05 | 0.00181% | 0.0 | 1 | 0.00132  | 5.2e-05  | 0.0      | 3.22e-05 | 0.00103%  |
| L595      | False | PRR-12   | 1.98e-05 | 0.0018%  | 0.0 | 1 | 0.00451  | 0.000308 | 0.000116 | 1.66e-05 | 0.00053%  |
| L5        | False | ABY1     | 1.98e-05 | 0.0018%  | 0.0 | 1 | 0.00101  | 5.28e-05 | 0.000152 | 2.68e-05 | 0.00086%  |
| L99       | False | ABY1     | 1.98e-05 | 0.0018%  | 0.0 | 1 | 0.0113   | 0.00152  | 0.000309 | 1.74e-05 | 0.000556% |
| L1178     | False | koll11   | 1.98e-05 | 0.0018%  | 0.0 | 1 | 0.00674  | 0.000452 | 0.000463 | 1.38e-05 | 0.000441% |
| L1352     | False | OD1      | 1.97e-05 | 0.0018%  | 0.0 | 1 | 0.00323  | 0.00065  | 0.00118  | 8.54e-05 | 0.00273%  |
| L482      | False | OP11-4   | 1.97e-05 | 0.0018%  | 0.0 | 1 | 0.0106   | 0.00161  | 0.000937 | 1.21e-05 | 0.000387% |
| L405      | False | ABY1     | 1.97e-05 | 0.0018%  | 0.0 | 1 | 0.00728  | 0.00232  | 0.000928 | 5.38e-05 | 0.00172%  |
| L308      | False | ABY1     | 1.97e-05 | 0.0018%  | 0.0 | 1 | 4.13e-05 | 0.00486  | 0.00425  | 2.27e-05 | 0.000726% |
| OTU_2374  | True  | koll11   | 1.95e-05 | 0.00178% | 0.0 | 1 | 0.00104  | 2.62e-06 | 6.21e-07 | 3.76e-05 | 0.0012%   |
| OTU_8134  | True  | ZB2      | 1.94e-05 | 0.00177% | 0.0 | 1 | 0.000565 | 0.0      | 0.0      | 4.11e-05 | 0.00132%  |
| L162      | False | ABY1     | 1.94e-05 | 0.00177% | 0.0 | 1 | 0.00208  | 0.000204 | 6.51e-05 | 2.34e-05 | 0.000751% |
| L174      | False | SM2F11   | 1.93e-05 | 0.00176% | 0.0 | 1 | 0.00246  | 0.000322 | 0.000252 | 2.38e-05 | 0.000761% |
| OTU_10749 | True  | OP11-4   | 1.92e-05 | 0.00175% | 0.0 | 1 | 0.0148   | 0.00217  | 0.00208  | 3.8e-05  | 0.00122%  |
| L419      | False | Bacteria | 1.92e-05 | 0.00175% | 0.0 | 1 | 0.821    | 0.835    | 0.892    | 0.000182 | 0.00582%  |
| OTU_7995  | True  | ABY1     | 1.92e-05 | 0.00174% | 0.0 | 1 | 7.37e-07 | 0.000415 | 0.00149  | 6.04e-05 | 0.00194%  |
| OTU_1400  | True  | PBS-25   | 1.91e-05 | 0.00174% | 0.0 | 1 | 0.0103   | 0.000807 | 0.00129  | 2.24e-05 | 0.000717% |
| OTU_2490  | True  | koll11   | 1.91e-05 | 0.00174% | 0.0 | 1 | 0.00605  | 0.000285 | 0.00139  | 4.9e-05  | 0.00157%  |
| L992      | False | koll11   | 1.91e-05 | 0.00174% | 0.0 | 1 | 0.0108   | 0.00128  | 0.00254  | 3.53e-05 | 0.00113%  |

|          |       |          |          |          |     |   |          |          |          |          |           |
|----------|-------|----------|----------|----------|-----|---|----------|----------|----------|----------|-----------|
| OTU_7263 | True  | ABY1     | 1.9e-05  | 0.00173% | 0.0 | 1 | 0.00408  | 0.000576 | 0.000198 | 1.26e-05 | 0.000404% |
| L1111    | False | koll11   | 1.89e-05 | 0.00172% | 0.0 | 1 | 0.0332   | 0.0038   | 0.00417  | 6.56e-06 | 0.00021%  |
| OTU_8072 | True  | ABY1     | 1.87e-05 | 0.00171% | 0.0 | 1 | 0.000767 | 8.77e-05 | 0.00013  | 4.21e-05 | 0.00135%  |
| L30      | False | OD1      | 1.87e-05 | 0.00171% | 0.0 | 1 | 0.129    | 0.152    | 0.0961   | 0.00028  | 0.00896%  |
| OTU_163  | True  | koll11   | 1.86e-05 | 0.0017%  | 0.0 | 1 | 0.00822  | 0.00023  | 0.00376  | 3.19e-05 | 0.00102%  |
| L1463    | False | ZB2      | 1.85e-05 | 0.00168% | 0.0 | 1 | 0.00031  | 0.00446  | 0.00687  | 2.93e-05 | 0.000938% |
| OTU_8038 | True  | ABY1     | 1.85e-05 | 0.00168% | 0.0 | 1 | 0.000963 | 0.0      | 1.33e-06 | 3.53e-05 | 0.00113%  |
| L444     | False | OP11-4   | 1.85e-05 | 0.00168% | 0.0 | 1 | 0.00153  | 9.98e-05 | 0.000932 | 7.74e-05 | 0.00248%  |
| L1786    | False | OD1      | 1.84e-05 | 0.00168% | 0.0 | 1 | 0.0042   | 0.000564 | 0.000357 | 1.51e-05 | 0.000483% |
| L76      | False | ABY1     | 1.84e-05 | 0.00168% | 0.0 | 1 | 0.00226  | 0.000876 | 7.94e-05 | 5.77e-05 | 0.00185%  |
| OTU_7120 | True  | ABY1     | 1.84e-05 | 0.00167% | 0.0 | 1 | 0.00264  | 0.00113  | 0.000122 | 5.12e-05 | 0.00164%  |
| L1356    | False | ZB2      | 1.83e-05 | 0.00167% | 0.0 | 1 | 0.00135  | 6.32e-05 | 9.89e-06 | 2.66e-05 | 0.000851% |
| OTU_8074 | True  | ABY1     | 1.83e-05 | 0.00167% | 0.0 | 1 | 0.00013  | 0.003    | 0.00269  | 3.92e-05 | 0.00125%  |
| L129     | False | ABY1     | 1.81e-05 | 0.00165% | 0.0 | 1 | 0.0016   | 5.64e-05 | 2.4e-05  | 2.87e-05 | 0.000919% |
| OTU_8776 | True  | Mb-NB09  | 1.8e-05  | 0.00164% | 0.0 | 1 | 0.00282  | 0.000674 | 3e-05    | 3.55e-05 | 0.00114%  |
| L1862    | False | OD1      | 1.8e-05  | 0.00164% | 0.0 | 1 | 0.00299  | 0.000578 | 0.000261 | 1.56e-05 | 0.000501% |
| L856     | False | OP3      | 1.79e-05 | 0.00163% | 0.0 | 1 | 0.0188   | 0.0018   | 0.0023   | 1.06e-05 | 0.000341% |
| OTU_261  | True  | koll11   | 1.79e-05 | 0.00163% | 0.0 | 1 | 0.00158  | 0.000138 | 0.0      | 3.82e-05 | 0.00122%  |
| L1629    | False | ZB2      | 1.78e-05 | 0.00162% | 0.0 | 1 | 0.00421  | 0.000863 | 0.00177  | 7.07e-05 | 0.00227%  |
| OTU_400  | True  | koll11   | 1.77e-05 | 0.00162% | 0.0 | 1 | 0.00169  | 0.000149 | 0.000315 | 5.42e-05 | 0.00174%  |
| L1457    | False | ZB2      | 1.77e-05 | 0.00162% | 0.0 | 1 | 0.0      | 0.000298 | 0.00235  | 3.72e-05 | 0.00119%  |
| L96      | False | ABY1     | 1.77e-05 | 0.00161% | 0.0 | 1 | 0.0144   | 0.00273  | 0.000524 | 1.15e-05 | 0.000369% |
| L183     | False | SM2F11   | 1.77e-05 | 0.00161% | 0.0 | 1 | 0.00924  | 0.00166  | 0.000295 | 1.17e-05 | 0.000376% |
| L116     | False | OD1      | 1.76e-05 | 0.00161% | 0.0 | 1 | 0.0156   | 0.0481   | 0.0305   | 6.71e-05 | 0.00215%  |
| L262     | False | OD1      | 1.76e-05 | 0.0016%  | 0.0 | 1 | 0.00905  | 0.00368  | 0.00216  | 4.97e-05 | 0.00159%  |
| L1056    | False | koll11   | 1.76e-05 | 0.0016%  | 0.0 | 1 | 0.00422  | 0.000431 | 0.000751 | 2.76e-05 | 0.000885% |
| L326     | False | ABY1     | 1.76e-05 | 0.0016%  | 0.0 | 1 | 0.00111  | 6.83e-05 | 0.00011  | 3.05e-05 | 0.000976% |
| L211     | False | ABY1     | 1.74e-05 | 0.00159% | 0.0 | 1 | 0.00121  | 1.04e-05 | 2.25e-05 | 2.78e-05 | 0.000891% |
| L851     | False | koll11   | 1.74e-05 | 0.00159% | 0.0 | 1 | 0.0245   | 0.00286  | 0.00211  | 9.38e-06 | 0.000301% |
| L483     | False | OP11-4   | 1.74e-05 | 0.00159% | 0.0 | 1 | 0.00221  | 0.000213 | 2e-05    | 2e-05    | 0.00064%  |
| L1856    | False | OD1      | 1.73e-05 | 0.00157% | 0.0 | 1 | 0.0036   | 0.000604 | 0.000285 | 1.11e-05 | 0.000357% |
| L538     | False | SJA-4    | 1.72e-05 | 0.00156% | 0.0 | 1 | 0.00567  | 0.000458 | 0.00297  | 7.83e-05 | 0.00251%  |
| L994     | False | koll11   | 1.71e-05 | 0.00156% | 0.0 | 1 | 0.0107   | 0.00127  | 0.00253  | 3.2e-05  | 0.00102%  |
| OTU_6084 | True  | ZB2      | 1.7e-05  | 0.00155% | 0.0 | 1 | 3.81e-05 | 0.00431  | 0.00169  | 3.41e-05 | 0.00109%  |
| L1865    | False | OD1      | 1.7e-05  | 0.00155% | 0.0 | 1 | 0.00164  | 0.000194 | 0.000194 | 2.23e-05 | 0.000715% |
| L1528    | False | OD1      | 1.7e-05  | 0.00155% | 0.0 | 1 | 0.00556  | 0.00121  | 0.002    | 4.06e-05 | 0.0013%   |
| OTU_32   | True  | Mb-NB09  | 1.68e-05 | 0.00153% | 0.0 | 1 | 0.000377 | 4.95e-05 | 8.9e-06  | 3.63e-05 | 0.00116%  |
| OTU_6635 | True  | OD1      | 1.68e-05 | 0.00153% | 0.0 | 1 | 0.000874 | 5.64e-06 | 3.78e-06 | 1.87e-05 | 0.000599% |
| L1306    | False | OD1      | 1.68e-05 | 0.00153% | 0.0 | 1 | 0.00704  | 0.000535 | 0.000845 | 2.13e-05 | 0.000681% |
| OTU_358  | True  | koll11   | 1.68e-05 | 0.00153% | 0.0 | 1 | 0.00144  | 8.12e-05 | 0.000643 | 6.64e-05 | 0.00213%  |
| L1692    | False | OD1      | 1.68e-05 | 0.00153% | 0.0 | 1 | 0.00375  | 0.000482 | 0.000105 | 1.1e-05  | 0.000352% |
| L1778    | False | OD1      | 1.67e-05 | 0.00152% | 0.0 | 1 | 0.00101  | 5.64e-06 | 3.78e-06 | 1.47e-05 | 0.00047%  |
| OTU_6663 | True  | ZB2      | 1.67e-05 | 0.00152% | 0.0 | 1 | 0.00199  | 0.000479 | 8.11e-05 | 3.2e-05  | 0.00103%  |
| OTU_6502 | True  | WCHB1-64 | 1.66e-05 | 0.00151% | 0.0 | 1 | 3.84e-05 | 0.000403 | 0.00123  | 4.82e-05 | 0.00154%  |
| L489     | False | OP11-4   | 1.66e-05 | 0.00151% | 0.0 | 1 | 0.00688  | 0.00113  | 0.000826 | 2.19e-05 | 0.000702% |
| OTU_1080 | True  | koll11   | 1.65e-05 | 0.0015%  | 0.0 | 1 | 0.00567  | 0.000205 | 0.000775 | 2.95e-05 | 0.000946% |
| OTU_6232 | True  | ZB2      | 1.65e-05 | 0.0015%  | 0.0 | 1 | 5.79e-05 | 0.00123  | 0.00528  | 4.67e-05 | 0.00149%  |
| L1684    | False | Mb-NB09  | 1.65e-05 | 0.0015%  | 0.0 | 1 | 0.00292  | 0.000674 | 3.75e-05 | 3.07e-05 | 0.000985% |
| OTU_7045 | True  | ABY1     | 1.63e-05 | 0.00149% | 0.0 | 1 | 7.16e-05 | 0.0184   | 0.00659  | 3.45e-05 | 0.00111%  |
| OTU_6203 | True  | OD1      | 1.61e-05 | 0.00146% | 0.0 | 1 | 5.6e-05  | 0.00615  | 0.00292  | 2.89e-05 | 0.000925% |
| L380     | False | OD1      | 1.6e-05  | 0.00146% | 0.0 | 1 | 0.000985 | 4.5e-05  | 5.3e-06  | 2.28e-05 | 0.000732% |
| OTU_7022 | True  | ABY1     | 1.6e-05  | 0.00146% | 0.0 | 1 | 0.00013  | 0.00831  | 0.00692  | 2.94e-05 | 0.000943% |
| OTU_217  | True  | koll11   | 1.6e-05  | 0.00146% | 0.0 | 1 | 0.00727  | 0.000675 | 0.00183  | 2.82e-05 | 0.000902% |
| L251     | False | ABY1     | 1.6e-05  | 0.00146% | 0.0 | 1 | 0.00556  | 0.00139  | 0.000179 | 2.39e-05 | 0.000765% |
| L1044    | False | koll11   | 1.6e-05  | 0.00146% | 0.0 | 1 | 0.0133   | 0.00166  | 0.00173  | 8.23e-06 | 0.000264% |
| L101     | False | ABY1     | 1.6e-05  | 0.00146% | 0.0 | 1 | 0.0107   | 0.00119  | 0.000302 | 1.34e-05 | 0.000429% |
| L714     | False | PBS-25   | 1.59e-05 | 0.00145% | 0.0 | 1 | 0.0149   | 0.00203  | 0.00355  | 2.57e-05 | 0.000825% |
| L1175    | False | koll11   | 1.59e-05 | 0.00145% | 0.0 | 1 | 0.0112   | 0.000971 | 0.00134  | 1.04e-05 | 0.000334% |
| L1277    | False | TM7      | 1.59e-05 | 0.00144% | 0.0 | 1 | 0.0054   | 0.000412 | 0.00107  | 3.91e-05 | 0.00125%  |
| OTU_7952 | True  | ABY1     | 1.59e-05 | 0.00144% | 0.0 | 1 | 0.000773 | 0.0      | 9.04e-07 | 2.51e-05 | 0.000804% |
| L1117    | False | koll11   | 1.58e-05 | 0.00144% | 0.0 | 1 | 0.0056   | 0.000328 | 0.0012   | 1.69e-05 | 0.00054%  |
| L737     | False | PBS-25   | 1.58e-05 | 0.00144% | 0.0 | 1 | 0.0172   | 0.00146  | 0.0023   | 2.46e-05 | 0.000789% |
| L226     | False | ABY1     | 1.58e-05 | 0.00144% | 0.0 | 1 | 0.00122  | 9.87e-05 | 0.0      | 3.27e-05 | 0.00105%  |
| L877     | False | koll11   | 1.58e-05 | 0.00144% | 0.0 | 1 | 0.0181   | 0.00204  | 0.00368  | 8.98e-06 | 0.000288% |

|           |       |                |          |          |     |   |          |          |          |          |           |
|-----------|-------|----------------|----------|----------|-----|---|----------|----------|----------|----------|-----------|
| OTU_994   | True  | [Acetothermia] | 1.57e-05 | 0.00143% | 0.0 | 1 | 0.000404 | 0.0      | 0.0      | 4.1e-05  | 0.00131%  |
| OTU_9054  | True  | ABY1           | 1.55e-05 | 0.00141% | 0.0 | 1 | 0.000228 | 0.0      | 0.000897 | 6.9e-05  | 0.00221%  |
| OTU_347   | True  | koll11         | 1.55e-05 | 0.00141% | 0.0 | 1 | 0.00245  | 0.000186 | 0.00104  | 5.11e-05 | 0.00164%  |
| OTU_567   | True  | koll11         | 1.54e-05 | 0.0014%  | 0.0 | 1 | 0.00119  | 3.33e-05 | 0.0      | 3.18e-05 | 0.00102%  |
| OTU_419   | True  | koll11         | 1.52e-05 | 0.00139% | 0.0 | 1 | 0.00131  | 1.91e-05 | 0.0      | 2.83e-05 | 0.000907% |
| L1857     | False | OD1            | 1.52e-05 | 0.00138% | 0.0 | 1 | 0.000613 | 2.61e-05 | 2.36e-05 | 2.22e-05 | 0.000711% |
| L1892     | False | OD1            | 1.51e-05 | 0.00138% | 0.0 | 1 | 0.00242  | 0.000516 | 0.000191 | 2.72e-05 | 0.000871% |
| L1125     | False | koll11         | 1.51e-05 | 0.00138% | 0.0 | 1 | 0.00335  | 0.000233 | 0.000126 | 2.77e-05 | 0.000887% |
| L136      | False | OD1            | 1.51e-05 | 0.00138% | 0.0 | 1 | 0.00941  | 0.0362   | 0.0206   | 6.91e-05 | 0.00221%  |
| OTU_6177  | True  | OD1            | 1.5e-05  | 0.00137% | 0.0 | 1 | 0.000672 | 0.000184 | 0.0      | 2.98e-05 | 0.000955% |
| L1039     | False | koll11         | 1.5e-05  | 0.00136% | 0.0 | 1 | 0.00782  | 0.000692 | 0.00215  | 2.54e-05 | 0.000813% |
| L1049     | False | koll11         | 1.49e-05 | 0.00136% | 0.0 | 1 | 0.00236  | 0.000322 | 4.11e-05 | 2.24e-05 | 0.000717% |
| OTU_6298  | True  | OD1            | 1.49e-05 | 0.00136% | 0.0 | 1 | 0.00242  | 0.000175 | 0.000667 | 3.9e-05  | 0.00125%  |
| OTU_10764 | True  | OP11-4         | 1.49e-05 | 0.00135% | 0.0 | 1 | 0.00525  | 0.001    | 0.000599 | 2.7e-05  | 0.000864% |
| L514      | False | OP11-3         | 1.48e-05 | 0.00135% | 0.0 | 1 | 0.00185  | 8.71e-05 | 7.23e-05 | 3.58e-05 | 0.00115%  |
| OTU_7223  | True  | ABY1           | 1.47e-05 | 0.00134% | 0.0 | 1 | 0.000754 | 0.000436 | 9.68e-06 | 3.64e-05 | 0.00117%  |
| OTU_8250  | True  | ABY1           | 1.47e-05 | 0.00134% | 0.0 | 1 | 0.00174  | 0.000876 | 7.94e-05 | 5.67e-05 | 0.00182%  |
| OTU_2352  | True  | SJA-4          | 1.47e-05 | 0.00134% | 0.0 | 1 | 0.000817 | 0.0      | 0.0      | 3.03e-05 | 0.000972% |
| L1037     | False | koll11         | 1.47e-05 | 0.00133% | 0.0 | 1 | 0.00853  | 0.000714 | 0.00216  | 2.1e-05  | 0.000673% |
| L1894     | False | OD1            | 1.46e-05 | 0.00133% | 0.0 | 1 | 0.00224  | 0.000452 | 0.000174 | 2.61e-05 | 0.000836% |
| OTU_247   | True  | koll11         | 1.46e-05 | 0.00133% | 0.0 | 1 | 0.00407  | 0.000771 | 0.000677 | 4.26e-05 | 0.00137%  |
| L29       | False | OD1            | 1.46e-05 | 0.00133% | 0.0 | 1 | 0.149    | 0.154    | 0.0974   | 0.00018  | 0.00578%  |
| OTU_6086  | True  | ZB2            | 1.44e-05 | 0.00131% | 0.0 | 1 | 0.000689 | 1.13e-05 | 2e-05    | 3.18e-05 | 0.00102%  |
| OTU_8007  | True  | ABY1           | 1.42e-05 | 0.00129% | 0.0 | 1 | 0.00099  | 1.29e-05 | 0.0      | 3.12e-05 | 0.000999% |
| L1472     | False | ZB2            | 1.42e-05 | 0.00129% | 0.0 | 1 | 0.00493  | 0.00119  | 0.00114  | 2.63e-05 | 0.000841% |
| OTU_5425  | True  | OD1            | 1.41e-05 | 0.00128% | 0.0 | 1 | 0.00229  | 0.000277 | 3.15e-05 | 1.75e-05 | 0.000559% |
| OTU_6667  | True  | ABY1           | 1.41e-05 | 0.00128% | 0.0 | 1 | 0.000229 | 0.0387   | 0.0113   | 2.25e-05 | 0.000722% |
| L346      | False | ABY1           | 1.4e-05  | 0.00128% | 0.0 | 1 | 0.00597  | 0.000708 | 0.000863 | 2.13e-05 | 0.000681% |
| L274      | False | ABY1           | 1.4e-05  | 0.00127% | 0.0 | 1 | 0.000213 | 0.00217  | 0.00132  | 4.59e-05 | 0.00147%  |
| OTU_2335  | True  | SBRH58         | 1.39e-05 | 0.00127% | 0.0 | 1 | 0.00126  | 6.35e-05 | 0.000116 | 4.65e-05 | 0.00149%  |
| OTU_1554  | True  | PBS-25         | 1.38e-05 | 0.00126% | 0.0 | 1 | 0.000976 | 0.0      | 0.0      | 1.78e-05 | 0.000569% |
| L1722     | False | Mb-NB09        | 1.38e-05 | 0.00126% | 0.0 | 1 | 0.00451  | 0.000732 | 0.000967 | 2.16e-05 | 0.000693% |
| L862      | False | koll11         | 1.37e-05 | 0.00125% | 0.0 | 1 | 0.0253   | 0.00297  | 0.00407  | 5.24e-06 | 0.000168% |
| L1753     | False | OD1            | 1.37e-05 | 0.00125% | 0.0 | 1 | 0.000542 | 0.000699 | 0.00192  | 0.000143 | 0.0046%   |
| OTU_4950  | True  | [Acetothermia] | 1.36e-05 | 0.00124% | 0.0 | 1 | 0.000409 | 3.22e-05 | 0.0      | 2.92e-05 | 0.000937% |
| L1696     | False | Mb-NB09        | 1.36e-05 | 0.00124% | 0.0 | 1 | 0.00111  | 0.000184 | 5.92e-05 | 2.02e-05 | 0.000647% |
| OTU_7990  | True  | ABY1           | 1.36e-05 | 0.00124% | 0.0 | 1 | 0.000857 | 0.000115 | 0.0      | 2.75e-05 | 0.00088%  |
| L991      | False | koll11         | 1.36e-05 | 0.00123% | 0.0 | 1 | 0.0127   | 0.00165  | 0.00357  | 2.16e-05 | 0.000692% |
| L995      | False | koll11         | 1.35e-05 | 0.00123% | 0.0 | 1 | 0.00844  | 0.00122  | 0.00251  | 3.02e-05 | 0.000969% |
| OTU_327   | True  | koll11         | 1.35e-05 | 0.00123% | 0.0 | 1 | 0.00135  | 0.0      | 0.0      | 2.19e-05 | 0.000701% |
| L1045     | False | koll11         | 1.34e-05 | 0.00122% | 0.0 | 1 | 0.0118   | 0.00161  | 0.00153  | 8.07e-06 | 0.000258% |
| OTU_323   | True  | koll11         | 1.33e-05 | 0.00121% | 0.0 | 1 | 0.00172  | 0.000137 | 4.14e-05 | 2.28e-05 | 0.00073%  |
| L264      | False | OD1            | 1.32e-05 | 0.0012%  | 0.0 | 1 | 0.00431  | 0.00212  | 0.00174  | 0.000124 | 0.00397%  |
| OTU_292   | True  | PBS-25         | 1.32e-05 | 0.0012%  | 0.0 | 1 | 0.00766  | 0.000603 | 0.000832 | 2.22e-05 | 0.000711% |
| L1262     | False | TM7-1          | 1.32e-05 | 0.0012%  | 0.0 | 1 | 0.00239  | 0.000263 | 7.09e-05 | 1.66e-05 | 0.000531% |
| L1611     | False | ZB2            | 1.31e-05 | 0.0012%  | 0.0 | 1 | 0.00197  | 0.000116 | 0.000108 | 1.69e-05 | 0.000541% |
| OTU_6073  | True  | ZB2            | 1.31e-05 | 0.0012%  | 0.0 | 1 | 6.88e-05 | 0.00613  | 0.00508  | 6.09e-05 | 0.00195%  |
| OTU_6914  | True  | ZB2            | 1.31e-05 | 0.0012%  | 0.0 | 1 | 0.000983 | 9.71e-05 | 0.000104 | 2.98e-05 | 0.000953% |
| L1282     | False | TM7-3          | 1.31e-05 | 0.00119% | 0.0 | 1 | 0.00454  | 0.000237 | 9.33e-05 | 2.45e-05 | 0.000785% |
| L1824     | False | OD1            | 1.31e-05 | 0.00119% | 0.0 | 1 | 0.00141  | 0.000249 | 0.000202 | 4.55e-05 | 0.00146%  |
| L328      | False | ABY1           | 1.3e-05  | 0.00118% | 0.0 | 1 | 0.00111  | 6.42e-05 | 0.000103 | 2.21e-05 | 0.000709% |
| L14       | False | OD1            | 1.29e-05 | 0.00118% | 0.0 | 1 | 0.00178  | 9.46e-05 | 6.93e-06 | 1.67e-05 | 0.000536% |
| L119      | False | ABY1           | 1.29e-05 | 0.00117% | 0.0 | 1 | 0.00115  | 0.0108   | 0.00791  | 4.1e-05  | 0.00131%  |
| L126      | False | OD1            | 1.27e-05 | 0.00116% | 0.0 | 1 | 0.0144   | 0.0368   | 0.0211   | 0.000101 | 0.00322%  |
| L1838     | False | OD1            | 1.27e-05 | 0.00115% | 0.0 | 1 | 0.00214  | 0.000426 | 0.000351 | 5.55e-05 | 0.00178%  |
| OTU_6064  | True  | ZB2            | 1.26e-05 | 0.00115% | 0.0 | 1 | 4.86e-05 | 0.00217  | 0.00235  | 3.91e-05 | 0.00125%  |
| L1195     | False | koll11         | 1.26e-05 | 0.00115% | 0.0 | 1 | 0.00339  | 0.000347 | 0.000824 | 1.7e-05  | 0.000546% |
| L979      | False | koll11         | 1.25e-05 | 0.00114% | 0.0 | 1 | 0.00389  | 0.000578 | 0.000458 | 2.09e-05 | 0.000668% |
| OTU_10801 | True  | OP11-4         | 1.25e-05 | 0.00114% | 0.0 | 1 | 0.00163  | 0.000124 | 0.000227 | 1.61e-05 | 0.000515% |
| L589      | False | PRR-12         | 1.25e-05 | 0.00114% | 0.0 | 1 | 0.0117   | 0.00137  | 0.000811 | 1.34e-05 | 0.000428% |
| L84       | False | ABY1           | 1.25e-05 | 0.00114% | 0.0 | 1 | 0.00168  | 7.15e-05 | 0.0      | 1.66e-05 | 0.000531% |
| OTU_6170  | True  | ZB2            | 1.25e-05 | 0.00113% | 0.0 | 1 | 0.000748 | 6.49e-05 | 0.0      | 2.1e-05  | 0.000674% |
| OTU_1087  | True  | OP3            | 1.24e-05 | 0.00113% | 0.0 | 1 | 0.000539 | 0.0      | 4.95e-06 | 2.41e-05 | 0.000771% |
| L1905     | False | OD1            | 1.24e-05 | 0.00113% | 0.0 | 1 | 0.0014   | 6.82e-05 | 1.12e-05 | 1.32e-05 | 0.000423% |
| L1244     | False | TM7-1          | 1.24e-05 | 0.00113% | 0.0 | 1 | 0.00175  | 0.0114   | 0.00877  | 4.98e-05 | 0.0016%   |

|          |       |          |          |           |     |   |          |          |          |          |           |
|----------|-------|----------|----------|-----------|-----|---|----------|----------|----------|----------|-----------|
| L82      | False | ABY1     | 1.23e-05 | 0.00112%  | 0.0 | 1 | 0.00203  | 0.000154 | 1.57e-05 | 1.46e-05 | 0.000467% |
| L1048    | False | koll11   | 1.22e-05 | 0.00111%  | 0.0 | 1 | 0.00643  | 0.00109  | 0.000718 | 1.85e-05 | 0.000593% |
| L1608    | False | ZB2      | 1.22e-05 | 0.00111%  | 0.0 | 1 | 0.00271  | 0.000144 | 0.000247 | 1.36e-05 | 0.000434% |
| OTU_7373 | True  | OD1      | 1.22e-05 | 0.00111%  | 0.0 | 1 | 0.001    | 0.000378 | 0.00029  | 6.72e-05 | 0.00215%  |
| L1245    | False | TM7-1    | 1.2e-05  | 0.0011%   | 0.0 | 1 | 0.00105  | 0.0113   | 0.00871  | 3.85e-05 | 0.00123%  |
| OTU_2622 | True  | SJA-4    | 1.2e-05  | 0.00109%  | 0.0 | 1 | 0.0      | 0.0      | 0.000969 | 2.78e-05 | 0.000891% |
| L1199    | False | koll11   | 1.2e-05  | 0.00109%  | 0.0 | 1 | 0.00218  | 0.000119 | 0.000231 | 1.12e-05 | 0.000358% |
| OTU_8016 | True  | TM7-3    | 1.19e-05 | 0.00108%  | 0.0 | 1 | 0.0      | 3.27e-05 | 0.000799 | 3.2e-05  | 0.00103%  |
| L1816    | False | OD1      | 1.19e-05 | 0.00108%  | 0.0 | 1 | 0.000476 | 4.44e-05 | 1.05e-05 | 2.91e-05 | 0.000933% |
| L1012    | False | koll11   | 1.19e-05 | 0.00108%  | 0.0 | 1 | 0.0296   | 0.00345  | 0.00396  | 4.29e-06 | 0.000137% |
| OTU_7164 | True  | ABY1     | 1.17e-05 | 0.00107%  | 0.0 | 1 | 0.000292 | 0.0      | 0.0      | 3.06e-05 | 0.000979% |
| OTU_8135 | True  | EW055    | 1.17e-05 | 0.00106%  | 0.0 | 1 | 0.00236  | 0.000236 | 0.0      | 3.65e-05 | 0.00117%  |
| OTU_4911 | True  | OD1      | 1.15e-05 | 0.00105%  | 0.0 | 1 | 0.000876 | 4.76e-05 | 2.33e-06 | 2.23e-05 | 0.000714% |
| L534     | False | TM6      | 1.15e-05 | 0.00104%  | 0.0 | 1 | 0.00728  | 0.000522 | 0.00308  | 3.76e-05 | 0.00121%  |
| OTU_8948 | True  | TM7      | 1.14e-05 | 0.00104%  | 0.0 | 1 | 0.000641 | 8.55e-05 | 3.62e-05 | 3.5e-05  | 0.00112%  |
| L113     | False | ABY1     | 1.14e-05 | 0.00104%  | 0.0 | 1 | 5.77e-06 | 0.00289  | 0.0016   | 1.78e-05 | 0.000571% |
| L1711    | False | OD1      | 1.14e-05 | 0.00104%  | 0.0 | 1 | 0.00402  | 0.00054  | 0.000178 | 1.48e-05 | 0.000474% |
| L283     | False | ABY1     | 1.14e-05 | 0.00104%  | 0.0 | 1 | 0.00821  | 0.0232   | 0.026    | 5.42e-05 | 0.00174%  |
| OTU_201  | True  | OD1      | 1.14e-05 | 0.00104%  | 0.0 | 1 | 0.000268 | 0.0      | 8.8e-06  | 2.66e-05 | 0.000851% |
| OTU_5635 | True  | OD1      | 1.14e-05 | 0.00104%  | 0.0 | 1 | 0.000386 | 0.0      | 4.9e-06  | 2.45e-05 | 0.000786% |
| OTU_409  | True  | koll11   | 1.14e-05 | 0.00103%  | 0.0 | 1 | 0.00134  | 3.16e-05 | 0.0      | 2.71e-05 | 0.000868% |
| L437     | False | OP11     | 1.13e-05 | 0.00103%  | 0.0 | 1 | 0.000934 | 2.01e-05 | 0.0      | 1.21e-05 | 0.000387% |
| L1131    | False | koll11   | 1.12e-05 | 0.00102%  | 0.0 | 1 | 0.0021   | 2.68e-05 | 0.000162 | 1.57e-05 | 0.000503% |
| OTU_7442 | True  | TM7-1    | 1.12e-05 | 0.00102%  | 0.0 | 1 | 0.00107  | 0.000263 | 7.09e-05 | 2.5e-05  | 0.000801% |
| OTU_8916 | True  | MJK10    | 1.11e-05 | 0.00101%  | 0.0 | 1 | 0.000863 | 6.49e-05 | 0.000213 | 2.44e-05 | 0.000781% |
| L802     | False | OP3      | 1.11e-05 | 0.00101%  | 0.0 | 1 | 0.046    | 0.00448  | 0.0104   | 8.51e-06 | 0.000273% |
| L978     | False | koll11   | 1.09e-05 | 0.000997% | 0.0 | 1 | 0.00426  | 0.000578 | 0.000458 | 1.73e-05 | 0.000553% |
| OTU_7941 | True  | ABY1     | 1.09e-05 | 0.000996% | 0.0 | 1 | 0.000991 | 1.41e-05 | 3.7e-05  | 1.6e-05  | 0.000513% |
| OTU_205  | True  | koll11   | 1.09e-05 | 0.000989% | 0.0 | 1 | 0.00562  | 0.000522 | 0.00036  | 9.86e-06 | 0.000316% |
| OTU_7982 | True  | ABY1     | 1.08e-05 | 0.000985% | 0.0 | 1 | 0.00318  | 0.000488 | 9.59e-05 | 1.38e-05 | 0.000441% |
| OTU_7840 | True  | ABY1     | 1.08e-05 | 0.000982% | 0.0 | 1 | 0.00251  | 0.000226 | 0.000147 | 1.83e-05 | 0.000586% |
| L1597    | False | OD1      | 1.07e-05 | 0.000979% | 0.0 | 1 | 0.000227 | 0.00627  | 0.00345  | 2.28e-05 | 0.00073%  |
| L1832    | False | OD1      | 1.07e-05 | 0.000978% | 0.0 | 1 | 0.00233  | 0.000453 | 0.00102  | 6.75e-05 | 0.00216%  |
| L1770    | False | OD1      | 1.07e-05 | 0.000974% | 0.0 | 1 | 0.00228  | 0.000228 | 0.000132 | 1.94e-05 | 0.00062%  |
| OTU_6586 | True  | OD1      | 1.07e-05 | 0.000973% | 0.0 | 1 | 0.00187  | 0.000426 | 0.000319 | 5.95e-05 | 0.00191%  |
| L80      | False | OD1      | 1.07e-05 | 0.000973% | 0.0 | 1 | 0.0417   | 0.0562   | 0.0333   | 0.000131 | 0.00421%  |
| L1486    | False | ZB2      | 1.06e-05 | 0.00097%  | 0.0 | 1 | 0.00303  | 0.000464 | 0.000627 | 2.22e-05 | 0.000712% |
| OTU_276  | True  | koll11   | 1.06e-05 | 0.000969% | 0.0 | 1 | 0.00258  | 0.000128 | 8.97e-05 | 1.88e-05 | 0.000602% |
| OTU_8127 | True  | ABY1     | 1.06e-05 | 0.000968% | 0.0 | 1 | 0.0      | 4.23e-05 | 0.000748 | 1.59e-05 | 0.000511% |
| L188     | False | SM2F11   | 1.06e-05 | 0.000968% | 0.0 | 1 | 0.00575  | 0.00116  | 0.000232 | 1.36e-05 | 0.000434% |
| L726     | False | PBS-25   | 1.06e-05 | 0.000964% | 0.0 | 1 | 0.00898  | 0.000932 | 0.00106  | 1.42e-05 | 0.000455% |
| L417     | False | Bacteria | 1.04e-05 | 0.00095%  | 0.0 | 1 | 0.821    | 0.835    | 0.892    | 9.93e-05 | 0.00318%  |
| L1662    | False | OD1      | 1.03e-05 | 0.000941% | 0.0 | 1 | 0.00671  | 0.00138  | 0.000778 | 1.07e-05 | 0.000343% |
| OTU_7166 | True  | ABY1     | 1.03e-05 | 0.000938% | 0.0 | 1 | 0.00079  | 0.0      | 0.0      | 2.22e-05 | 0.00071%  |
| OTU_8910 | True  | TM7-1    | 1.03e-05 | 0.000937% | 0.0 | 1 | 0.000491 | 0.0      | 0.0      | 1.9e-05  | 0.000608% |
| L1610    | False | ZB2      | 1.03e-05 | 0.000936% | 0.0 | 1 | 0.00255  | 0.000139 | 0.000167 | 1.27e-05 | 0.000407% |
| OTU_8010 | True  | ABY1     | 1.03e-05 | 0.000935% | 0.0 | 1 | 0.000404 | 0.0      | 2.02e-06 | 2.75e-05 | 0.000881% |
| L243     | False | ABY1     | 1.02e-05 | 0.000929% | 0.0 | 1 | 0.001    | 2.79e-05 | 0.00106  | 6.19e-05 | 0.00198%  |
| L284     | False | ABY1     | 1.02e-05 | 0.000927% | 0.0 | 1 | 0.00717  | 0.0118   | 0.0172   | 9.54e-05 | 0.00306%  |
| L1799    | False | OD1      | 1.02e-05 | 0.000927% | 0.0 | 1 | 0.00141  | 2.46e-05 | 3.82e-05 | 9e-06    | 0.000288% |
| L1096    | False | koll11   | 1.02e-05 | 0.000926% | 0.0 | 1 | 0.0121   | 0.00154  | 0.00392  | 1.32e-05 | 0.000422% |
| OTU_6987 | True  | OD1      | 1.01e-05 | 0.000923% | 0.0 | 1 | 0.00542  | 0.00124  | 0.000358 | 1.79e-05 | 0.000575% |
| L79      | False | OD1      | 1.01e-05 | 0.000922% | 0.0 | 1 | 0.0417   | 0.0589   | 0.0359   | 0.000125 | 0.004%    |
| L1018    | False | koll11   | 1.01e-05 | 0.00092%  | 0.0 | 1 | 0.00641  | 0.000809 | 0.00079  | 8.65e-06 | 0.000277% |
| L1559    | False | ZB2      | 1.01e-05 | 0.00092%  | 0.0 | 1 | 0.00958  | 0.000825 | 0.000482 | 1.28e-05 | 0.000409% |
| OTU_8013 | True  | ABY1     | 1.01e-05 | 0.000919% | 0.0 | 1 | 5.72e-06 | 0.000554 | 0.00196  | 3.08e-05 | 0.000988% |
| L1249    | False | TM7-1    | 1.01e-05 | 0.000918% | 0.0 | 1 | 0.00102  | 8.05e-05 | 4e-06    | 9.82e-06 | 0.000315% |
| L1179    | False | GIF10    | 1e-05    | 0.000914% | 0.0 | 1 | 0.00535  | 0.000437 | 0.00042  | 9.49e-06 | 0.000304% |
| L269     | False | OD1      | 1e-05    | 0.000913% | 0.0 | 1 | 0.00549  | 0.00432  | 0.00129  | 5.57e-05 | 0.00178%  |
| L1886    | False | OD1      | 9.98e-06 | 0.000909% | 0.0 | 1 | 0.00294  | 0.000617 | 0.000218 | 1.41e-05 | 0.000453% |
| L1290    | False | TM7-3    | 9.98e-06 | 0.000909% | 0.0 | 1 | 0.00412  | 0.000237 | 9.33e-05 | 1.98e-05 | 0.000635% |
| L540     | False | SJA-4    | 9.98e-06 | 0.000909% | 0.0 | 1 | 0.00398  | 0.000458 | 0.00297  | 6.47e-05 | 0.00207%  |
| L8       | False | ABY1     | 9.96e-06 | 0.000907% | 0.0 | 1 | 0.00161  | 0.000551 | 9.68e-06 | 2.01e-05 | 0.000643% |
| OTU_1149 | True  | koll11   | 9.94e-06 | 0.000906% | 0.0 | 1 | 0.000663 | 0.000148 | 6.99e-05 | 2.75e-05 | 0.00088%  |
| L334     | False | OD1      | 9.94e-06 | 0.000905% | 0.0 | 1 | 0.000903 | 0.00012  | 5.8e-05  | 1.94e-05 | 0.000622% |



|           |       |         |          |           |     |   |          |          |          |          |           |
|-----------|-------|---------|----------|-----------|-----|---|----------|----------|----------|----------|-----------|
| OTU_9845  | True  | SC3     | 9.9e-06  | 0.000902% | 0.0 | 1 | 0.000495 | 0.0      | 0.0      | 1.9e-05  | 0.000608% |
| L773      | False | PBS-25  | 9.87e-06 | 0.000899% | 0.0 | 1 | 0.00299  | 0.000273 | 0.000408 | 3.04e-05 | 0.000975% |
| L1055     | False | koll11  | 9.83e-06 | 0.000895% | 0.0 | 1 | 0.0047   | 0.000475 | 0.000778 | 1.41e-05 | 0.000452% |
| L1532     | False | OD1     | 9.82e-06 | 0.000895% | 0.0 | 1 | 0.00459  | 0.000778 | 0.00181  | 2.61e-05 | 0.000836% |
| L876      | False | koll11  | 9.74e-06 | 0.000887% | 0.0 | 1 | 0.0183   | 0.00209  | 0.00369  | 5.53e-06 | 0.000177% |
| OTU_6179  | True  | ZB2     | 9.72e-06 | 0.000885% | 0.0 | 1 | 0.00053  | 1.5e-05  | 9.55e-06 | 1.22e-05 | 0.000389% |
| OTU_270   | True  | koll11  | 9.69e-06 | 0.000883% | 0.0 | 1 | 0.00071  | 2.21e-05 | 9.5e-06  | 2.09e-05 | 0.000669% |
| L128      | False | OD1     | 9.67e-06 | 0.000881% | 0.0 | 1 | 0.0144   | 0.0367   | 0.0211   | 7.8e-05  | 0.0025%   |
| L41       | False | OD1     | 9.65e-06 | 0.000879% | 0.0 | 1 | 0.0048   | 0.000185 | 0.00109  | 1.01e-05 | 0.000322% |
| L1606     | False | OD1     | 9.64e-06 | 0.000878% | 0.0 | 1 | 0.00978  | 0.00254  | 0.00295  | 1.86e-05 | 0.000595% |
| OTU_5954  | True  | OD1     | 9.61e-06 | 0.000875% | 0.0 | 1 | 0.000655 | 0.0      | 0.0      | 2.02e-05 | 0.000646% |
| L961      | False | koll11  | 9.58e-06 | 0.000873% | 0.0 | 1 | 0.02     | 0.00161  | 0.00111  | 6.84e-06 | 0.000219% |
| OTU_6699  | True  | ZB2     | 9.56e-06 | 0.000871% | 0.0 | 1 | 0.000345 | 2.69e-06 | 0.0      | 1.87e-05 | 0.0006%   |
| OTU_7050  | True  | ABY1    | 9.48e-06 | 0.000864% | 0.0 | 1 | 0.000763 | 2.97e-05 | 0.000157 | 2.24e-05 | 0.000719% |
| OTU_229   | True  | koll11  | 9.34e-06 | 0.00085%  | 0.0 | 1 | 0.00317  | 0.00058  | 0.000482 | 1.11e-05 | 0.000354% |
| OTU_6990  | True  | ZB2     | 9.32e-06 | 0.000849% | 0.0 | 1 | 0.000128 | 0.00264  | 0.00103  | 3.6e-05  | 0.00115%  |
| OTU_6178  | True  | ZB2     | 9.25e-06 | 0.000842% | 0.0 | 1 | 0.00388  | 0.00016  | 0.000185 | 1.52e-05 | 0.000485% |
| L1702     | False | OD1     | 9.23e-06 | 0.000841% | 0.0 | 1 | 0.00249  | 0.000189 | 4.59e-05 | 9.67e-06 | 0.00031%  |
| OTU_5362  | True  | ZB2     | 9.22e-06 | 0.00084%  | 0.0 | 1 | 0.000764 | 2.12e-05 | 3.57e-06 | 1.56e-05 | 0.000501% |
| OTU_9171  | True  | Mb-NB09 | 9.19e-06 | 0.000837% | 0.0 | 1 | 0.000912 | 6.76e-05 | 0.0      | 1.33e-05 | 0.000427% |
| L395      | False | ABY1    | 9.13e-06 | 0.000832% | 0.0 | 1 | 0.00361  | 0.00017  | 0.000155 | 7.95e-06 | 0.000255% |
| L1190     | False | koll11  | 9.08e-06 | 0.000827% | 0.0 | 1 | 0.00139  | 1.48e-05 | 4.3e-05  | 1.25e-05 | 0.000399% |
| L1551     | False | ZB2     | 9.06e-06 | 0.000826% | 0.0 | 1 | 0.00631  | 0.00132  | 0.000704 | 1.52e-05 | 0.000488% |
| L492      | False | OP11-4  | 9.02e-06 | 0.000821% | 0.0 | 1 | 0.00152  | 0.000274 | 9.09e-05 | 1.08e-05 | 0.000347% |
| OTU_2377  | True  | SJA-4   | 9.01e-06 | 0.000821% | 0.0 | 1 | 0.000643 | 0.0      | 0.0      | 1.87e-05 | 0.000598% |
| L776      | False | PBS-25  | 9e-06    | 0.00082%  | 0.0 | 1 | 0.00209  | 0.000216 | 0.00011  | 2.57e-05 | 0.000822% |
| L1821     | False | OD1     | 9e-06    | 0.00082%  | 0.0 | 1 | 0.000951 | 4.76e-05 | 2.4e-06  | 1.55e-05 | 0.000498% |
| L1547     | False | ZB2     | 8.99e-06 | 0.000819% | 0.0 | 1 | 0.0029   | 0.00036  | 0.00013  | 1.06e-05 | 0.000339% |
| OTU_8003  | True  | d153    | 8.98e-06 | 0.000818% | 0.0 | 1 | 0.000315 | 6.41e-07 | 0.0      | 1.85e-05 | 0.000594% |
| OTU_7940  | True  | ABY1    | 8.94e-06 | 0.000814% | 0.0 | 1 | 0.00279  | 0.000147 | 0.000136 | 9.22e-06 | 0.000295% |
| L277      | False | ABY1    | 8.91e-06 | 0.000812% | 0.0 | 1 | 0.0118   | 0.0237   | 0.0261   | 8.32e-05 | 0.00266%  |
| L607      | False | PRR-12  | 8.9e-06  | 0.000811% | 0.0 | 1 | 0.002    | 3.67e-06 | 0.0      | 1.02e-05 | 0.000328% |
| OTU_6039  | True  | OD1     | 8.89e-06 | 0.00081%  | 0.0 | 1 | 0.000299 | 1.43e-05 | 4.16e-05 | 3.21e-05 | 0.00103%  |
| L1694     | False | OD1     | 8.89e-06 | 0.00081%  | 0.0 | 1 | 0.0036   | 0.000482 | 0.000105 | 6.71e-06 | 0.000215% |
| OTU_5496  | True  | ZB2     | 8.89e-06 | 0.000809% | 0.0 | 1 | 0.00188  | 0.000586 | 0.00117  | 8.69e-05 | 0.00278%  |
| OTU_10750 | True  | OP11-4  | 8.88e-06 | 0.000809% | 0.0 | 1 | 0.000425 | 0.0      | 0.0      | 1.91e-05 | 0.000611% |
| OTU_8764  | True  | ABY1    | 8.87e-06 | 0.000808% | 0.0 | 1 | 0.000694 | 9.54e-05 | 7.42e-08 | 1.67e-05 | 0.000535% |
| L1724     | False | Mb-NB09 | 8.83e-06 | 0.000804% | 0.0 | 1 | 0.00399  | 0.000603 | 0.000939 | 1.49e-05 | 0.000477% |
| OTU_8147  | True  | ABY1    | 8.78e-06 | 0.0008%   | 0.0 | 1 | 0.000529 | 4.81e-06 | 3.16e-05 | 1.15e-05 | 0.000369% |
| L139      | False | OD1     | 8.77e-06 | 0.000799% | 0.0 | 1 | 0.00922  | 0.0212   | 0.00734  | 7.69e-05 | 0.00246%  |
| L294      | False | ABY1    | 8.76e-06 | 0.000798% | 0.0 | 1 | 0.0067   | 0.00777  | 0.0138   | 0.000124 | 0.00398%  |
| L1607     | False | OD1     | 8.73e-06 | 0.000795% | 0.0 | 1 | 0.005    | 0.00168  | 0.00118  | 2.27e-05 | 0.000728% |
| OTU_7946  | True  | ABY1    | 8.72e-06 | 0.000794% | 0.0 | 1 | 0.000243 | 0.0      | 0.0      | 1.62e-05 | 0.000519% |
| L854      | False | OP3     | 8.61e-06 | 0.000784% | 0.0 | 1 | 0.0209   | 0.00202  | 0.00241  | 4.65e-06 | 0.000149% |
| L55       | False | ABY1    | 8.6e-06  | 0.000783% | 0.0 | 1 | 0.00341  | 0.000106 | 0.0      | 1.8e-05  | 0.000575% |
| OTU_8823  | True  | OD1     | 8.58e-06 | 0.000781% | 0.0 | 1 | 0.000881 | 0.0      | 0.0      | 1.79e-05 | 0.000572% |
| OTU_6986  | True  | ZB2     | 8.56e-06 | 0.00078%  | 0.0 | 1 | 0.000655 | 0.000275 | 0.000161 | 3.85e-05 | 0.00123%  |
| OTU_4488  | True  | PRR-12  | 8.54e-06 | 0.000778% | 0.0 | 1 | 0.000245 | 0.0      | 0.0      | 1.82e-05 | 0.000584% |
| L147      | False | OD1     | 8.53e-06 | 0.000777% | 0.0 | 1 | 0.00432  | 0.00093  | 0.000217 | 9.64e-06 | 0.000309% |
| OTU_9143  | True  | OD1     | 8.52e-06 | 0.000776% | 0.0 | 1 | 0.0      | 0.000131 | 0.000283 | 4.72e-05 | 0.00151%  |
| OTU_2351  | True  | SJA-4   | 8.5e-06  | 0.000774% | 0.0 | 1 | 0.000437 | 0.0      | 0.0      | 1.76e-05 | 0.000563% |
| OTU_9178  | True  | ABY1    | 8.48e-06 | 0.000773% | 0.0 | 1 | 0.000521 | 0.0      | 7.42e-08 | 1.02e-05 | 0.000325% |
| L1813     | False | OD1     | 8.48e-06 | 0.000772% | 0.0 | 1 | 0.00237  | 0.000145 | 0.000183 | 1.38e-05 | 0.000442% |
| OTU_8334  | True  | ABY1    | 8.42e-06 | 0.000767% | 0.0 | 1 | 0.000308 | 0.0      | 0.0      | 1.82e-05 | 0.000583% |
| L107      | False | ABY1    | 8.34e-06 | 0.00076%  | 0.0 | 1 | 0.00462  | 0.000686 | 0.000429 | 6e-06    | 0.000192% |
| OTU_2076  | True  | PRR-12  | 8.33e-06 | 0.000759% | 0.0 | 1 | 0.000747 | 0.0      | 7.42e-08 | 1.24e-05 | 0.000397% |
| L165      | False | ABY1    | 8.32e-06 | 0.000758% | 0.0 | 1 | 0.00193  | 0.000161 | 5.72e-05 | 9.81e-06 | 0.000314% |
| L356      | False | ABY1    | 8.31e-06 | 0.000757% | 0.0 | 1 | 0.000561 | 2.96e-05 | 4.68e-06 | 1.06e-05 | 0.00034%  |
| OTU_7350  | True  | ABY1    | 8.3e-06  | 0.000756% | 0.0 | 1 | 5.77e-06 | 0.0012   | 0.000451 | 1.52e-05 | 0.000487% |
| L425      | False | OP11    | 8.29e-06 | 0.000756% | 0.0 | 1 | 0.00269  | 0.000622 | 0.00209  | 3.81e-05 | 0.00122%  |
| L376      | False | OD1     | 8.14e-06 | 0.000742% | 0.0 | 1 | 0.00136  | 4.5e-05  | 5.38e-06 | 7.36e-06 | 0.000236% |
| OTU_895   | True  | PRR-12  | 8.14e-06 | 0.000742% | 0.0 | 1 | 0.00131  | 0.000104 | 2.33e-05 | 1.22e-05 | 0.000389% |
| L1022     | False | koll11  | 8.12e-06 | 0.00074%  | 0.0 | 1 | 0.00293  | 0.000193 | 0.000308 | 1.13e-05 | 0.000363% |
| L827      | False | PBS-25  | 8.12e-06 | 0.000739% | 0.0 | 1 | 0.00375  | 0.000411 | 0.000376 | 1.95e-05 | 0.000625% |
| OTU_6183  | True  | WCHB1   | 8.07e-06 | 0.000735% | 0.0 | 1 | 0.00075  | 5.1e-05  | 0.000189 | 2.84e-05 | 0.000908% |

|          |       |          |          |           |     |   |          |          |          |          |           |
|----------|-------|----------|----------|-----------|-----|---|----------|----------|----------|----------|-----------|
| OTU_349  | True  | koll11   | 8.06e-06 | 0.000735% | 0.0 | 1 | 0.00214  | 0.000222 | 0.000113 | 1.66e-05 | 0.000532% |
| OTU_7850 | True  | ABY1     | 8.02e-06 | 0.000731% | 0.0 | 1 | 0.0002   | 0.0      | 1.4e-06  | 1.77e-05 | 0.000567% |
| L172     | False | OD1      | 7.96e-06 | 0.000725% | 0.0 | 1 | 0.0324   | 0.00677  | 0.0044   | 5.02e-06 | 0.000161% |
| L1058    | False | koll11   | 7.96e-06 | 0.000725% | 0.0 | 1 | 0.00303  | 0.000398 | 0.000751 | 1.97e-05 | 0.000632% |
| OTU_8768 | True  | Mb-NB09  | 7.94e-06 | 0.000723% | 0.0 | 1 | 0.00171  | 0.000153 | 6.89e-05 | 6.2e-06  | 0.000199% |
| L768     | False | PBS-25   | 7.91e-06 | 0.000721% | 0.0 | 1 | 0.00416  | 0.000323 | 0.000443 | 1.51e-05 | 0.000484% |
| L1462    | False | ZB2      | 7.91e-06 | 0.00072%  | 0.0 | 1 | 0.000383 | 0.00461  | 0.00688  | 1.24e-05 | 0.000397% |
| OTU_6669 | True  | ZB2      | 7.91e-06 | 0.00072%  | 0.0 | 1 | 1.06e-05 | 0.0      | 0.000365 | 2.11e-05 | 0.000677% |
| OTU_325  | True  | koll11   | 7.86e-06 | 0.000716% | 0.0 | 1 | 0.00134  | 1.16e-05 | 0.0      | 1.36e-05 | 0.000436% |
| OTU_415  | True  | koll11   | 7.84e-06 | 0.000714% | 0.0 | 1 | 0.000675 | 0.0      | 0.0      | 2.14e-05 | 0.000686% |
| L234     | False | ABY1     | 7.82e-06 | 0.000713% | 0.0 | 1 | 0.00418  | 0.000265 | 0.000281 | 1.09e-05 | 0.000348% |
| OTU_8008 | True  | TM7-1    | 7.78e-06 | 0.000709% | 0.0 | 1 | 0.000534 | 0.0      | 0.0      | 2.04e-05 | 0.000653% |
| OTU_8060 | True  | OD1      | 7.75e-06 | 0.000706% | 0.0 | 1 | 0.000159 | 1.04e-05 | 0.0      | 1.64e-05 | 0.000525% |
| OTU_8221 | True  | OD1      | 7.7e-06  | 0.000702% | 0.0 | 1 | 0.000139 | 0.0      | 0.0      | 1.38e-05 | 0.000443% |
| L209     | False | ABY1     | 7.69e-06 | 0.0007%   | 0.0 | 1 | 0.00136  | 2.23e-05 | 2.26e-05 | 1.03e-05 | 0.000328% |
| OTU_7028 | True  | ABY1     | 7.67e-06 | 0.000699% | 0.0 | 1 | 0.0      | 0.00168  | 0.00115  | 1.77e-05 | 0.000566% |
| L434     | False | WCHB1-64 | 7.65e-06 | 0.000697% | 0.0 | 1 | 0.000447 | 0.00014  | 0.000672 | 6.62e-05 | 0.00212%  |
| L1146    | False | koll11   | 7.64e-06 | 0.000696% | 0.0 | 1 | 0.00412  | 0.000314 | 0.00133  | 1.57e-05 | 0.000501% |
| OTU_7962 | True  | ABY1     | 7.61e-06 | 0.000693% | 0.0 | 1 | 0.000894 | 0.00015  | 0.000274 | 3.21e-05 | 0.00103%  |
| OTU_8318 | True  | OD1      | 7.61e-06 | 0.000693% | 0.0 | 1 | 0.00042  | 8.91e-05 | 0.0      | 2.58e-05 | 0.000826% |
| OTU_7143 | True  | OP11-4   | 7.61e-06 | 0.000693% | 0.0 | 1 | 0.00102  | 4.99e-05 | 0.00075  | 4.63e-05 | 0.00148%  |
| L599     | False | PRR-12   | 7.6e-06  | 0.000692% | 0.0 | 1 | 0.00296  | 0.000204 | 9.29e-05 | 9.5e-06  | 0.000304% |
| L945     | False | koll11   | 7.58e-06 | 0.00069%  | 0.0 | 1 | 0.0044   | 0.000492 | 0.00106  | 7.29e-06 | 0.000234% |
| OTU_82   | True  | ZB2      | 7.57e-06 | 0.00069%  | 0.0 | 1 | 0.000212 | 2.47e-05 | 0.000208 | 7.69e-05 | 0.00246%  |
| L345     | False | OD1      | 7.51e-06 | 0.000684% | 0.0 | 1 | 0.00656  | 0.000821 | 0.000879 | 1.05e-05 | 0.000336% |
| L285     | False | ABY1     | 7.48e-06 | 0.000682% | 0.0 | 1 | 0.000463 | 0.00405  | 0.00336  | 2.12e-05 | 0.000681% |
| OTU_359  | True  | koll11   | 7.48e-06 | 0.000681% | 0.0 | 1 | 0.000653 | 0.0      | 0.0      | 1.4e-05  | 0.000447% |
| OTU_2334 | True  | SJA-4    | 7.47e-06 | 0.000681% | 0.0 | 1 | 3.25e-06 | 0.00023  | 0.00101  | 2.78e-05 | 0.000889% |
| OTU_7978 | True  | ABY1     | 7.46e-06 | 0.000679% | 0.0 | 1 | 0.00107  | 0.000361 | 3.07e-05 | 1.61e-05 | 0.000515% |
| OTU_8141 | True  | ABY1     | 7.46e-06 | 0.000679% | 0.0 | 1 | 2.74e-05 | 0.00622  | 0.00317  | 1.64e-05 | 0.000524% |
| L412     | False | ABY1     | 7.44e-06 | 0.000678% | 0.0 | 1 | 0.000112 | 0.000583 | 0.00196  | 3.17e-05 | 0.00102%  |
| OTU_8120 | True  | ABY1     | 7.44e-06 | 0.000678% | 0.0 | 1 | 1.07e-05 | 0.00206  | 0.00362  | 1.12e-05 | 0.000357% |
| L601     | False | PRR-12   | 7.44e-06 | 0.000678% | 0.0 | 1 | 0.00193  | 0.000148 | 7.07e-05 | 1.34e-05 | 0.000431% |
| OTU_428  | True  | koll11   | 7.44e-06 | 0.000678% | 0.0 | 1 | 0.000109 | 6.34e-06 | 0.000951 | 2.44e-05 | 0.000782% |
| OTU_250  | True  | koll11   | 7.43e-06 | 0.000677% | 0.0 | 1 | 0.00141  | 0.000287 | 0.000315 | 2.69e-05 | 0.00086%  |
| OTU_455  | True  | PBS-25   | 7.42e-06 | 0.000676% | 0.0 | 1 | 0.00194  | 0.000194 | 2.25e-06 | 1.8e-05  | 0.000577% |
| L752     | False | PBS-25   | 7.4e-06  | 0.000674% | 0.0 | 1 | 0.00467  | 0.000446 | 0.00103  | 1.24e-05 | 0.000399% |
| OTU_6584 | True  | OD1      | 7.37e-06 | 0.000671% | 0.0 | 1 | 0.0      | 0.000204 | 0.000877 | 2.54e-05 | 0.000812% |
| L120     | False | ABY1     | 7.37e-06 | 0.000671% | 0.0 | 1 | 0.00111  | 2.24e-05 | 0.0      | 1.44e-05 | 0.00046%  |
| OTU_604  | True  | koll11   | 7.33e-06 | 0.000668% | 0.0 | 1 | 0.00328  | 0.000298 | 6.8e-05  | 1.25e-05 | 0.000401% |
| L1800    | False | OD1      | 7.32e-06 | 0.000667% | 0.0 | 1 | 0.000691 | 2.46e-05 | 3.82e-05 | 1.05e-05 | 0.000338% |
| L499     | False | OP11-4   | 7.31e-06 | 0.000666% | 0.0 | 1 | 0.000679 | 5.38e-05 | 0.0      | 7.98e-06 | 0.000256% |
| L469     | False | OP11-4   | 7.29e-06 | 0.000664% | 0.0 | 1 | 0.00255  | 0.000508 | 0.000127 | 6.32e-06 | 0.000202% |
| L1029    | False | koll11   | 7.27e-06 | 0.000662% | 0.0 | 1 | 0.00958  | 0.000872 | 0.00314  | 1.07e-05 | 0.000343% |
| OTU_1019 | True  | PBS-25   | 7.25e-06 | 0.000661% | 0.0 | 1 | 0.000962 | 1.87e-05 | 1.33e-05 | 1.61e-05 | 0.000514% |
| L1107    | False | koll11   | 7.24e-06 | 0.00066%  | 0.0 | 1 | 0.00157  | 4.05e-05 | 4.36e-05 | 7.69e-06 | 0.000246% |
| L1514    | False | OD1      | 7.19e-06 | 0.000655% | 0.0 | 1 | 0.000774 | 0.0002   | 0.0013   | 4.64e-05 | 0.00149%  |
| L1238    | False | TM7      | 7.18e-06 | 0.000654% | 0.0 | 1 | 0.00506  | 0.0117   | 0.00915  | 0.000125 | 0.00401%  |
| OTU_8113 | True  | ABY1     | 7.16e-06 | 0.000652% | 0.0 | 1 | 0.000348 | 8.28e-05 | 1.57e-05 | 2.31e-05 | 0.000739% |
| L654     | False | koll11   | 7.16e-06 | 0.000652% | 0.0 | 1 | 0.0157   | 0.00222  | 0.00438  | 4.85e-06 | 0.000155% |
| L745     | False | PBS-25   | 7.15e-06 | 0.000652% | 0.0 | 1 | 0.0068   | 0.000675 | 0.00108  | 9.32e-06 | 0.000299% |
| L1163    | False | koll11   | 7.11e-06 | 0.000648% | 0.0 | 1 | 0.00167  | 4.77e-05 | 3.45e-05 | 1.45e-05 | 0.000463% |
| L1016    | False | koll11   | 7.11e-06 | 0.000647% | 0.0 | 1 | 0.00728  | 0.001    | 0.000836 | 6.18e-06 | 0.000198% |
| L363     | False | OD1      | 7.1e-06  | 0.000647% | 0.0 | 1 | 0.00101  | 2.09e-05 | 9.04e-07 | 9.64e-06 | 0.000309% |
| L1319    | False | OD1      | 7.08e-06 | 0.000645% | 0.0 | 1 | 0.000385 | 0.0      | 1.65e-05 | 7.87e-06 | 0.000252% |
| OTU_318  | True  | koll11   | 7.07e-06 | 0.000644% | 0.0 | 1 | 0.0029   | 0.000139 | 0.000437 | 1.55e-05 | 0.000495% |
| L1908    | False | OD1      | 7.07e-06 | 0.000644% | 0.0 | 1 | 0.00077  | 5.34e-05 | 7.6e-06  | 1.02e-05 | 0.000327% |
| OTU_6761 | True  | ZB2      | 7.02e-06 | 0.000639% | 0.0 | 1 | 0.0      | 2.75e-05 | 0.000667 | 1.97e-05 | 0.000631% |
| L470     | False | OP11-4   | 7e-06    | 0.000637% | 0.0 | 1 | 0.00155  | 0.000281 | 7.67e-05 | 7.78e-06 | 0.000249% |
| L1474    | False | ZB2      | 6.9e-06  | 0.000629% | 0.0 | 1 | 0.0048   | 0.00119  | 0.00114  | 1.34e-05 | 0.000429% |
| OTU_7298 | True  | ABY1     | 6.9e-06  | 0.000628% | 0.0 | 1 | 0.000134 | 0.00209  | 0.00129  | 1.97e-05 | 0.000631% |
| L1592    | False | OD1      | 6.89e-06 | 0.000628% | 0.0 | 1 | 0.00194  | 0.00666  | 0.00471  | 6.29e-05 | 0.00201%  |
| OTU_8909 | True  | ABY1     | 6.89e-06 | 0.000627% | 0.0 | 1 | 0.000994 | 1.13e-05 | 0.0      | 1.38e-05 | 0.000441% |
| L194     | False | ABY1     | 6.88e-06 | 0.000627% | 0.0 | 1 | 0.0055   | 0.000801 | 0.000814 | 7.35e-06 | 0.000235% |

|           |       |         |          |           |     |   |          |          |          |          |           |
|-----------|-------|---------|----------|-----------|-----|---|----------|----------|----------|----------|-----------|
| L336      | False | OD1     | 6.83e-06 | 0.000622% | 0.0 | 1 | 0.000781 | 7.02e-05 | 5.76e-05 | 1.25e-05 | 0.0004%   |
| OTU_4142  | True  | koll11  | 6.8e-06  | 0.00062%  | 0.0 | 1 | 0.000633 | 0.0      | 0.0      | 1.49e-05 | 0.000476% |
| L1141     | False | koll11  | 6.8e-06  | 0.00062%  | 0.0 | 1 | 0.00907  | 0.00182  | 0.000752 | 1.25e-05 | 0.000399% |
| OTU_6494  | True  | ZB2     | 6.78e-06 | 0.000617% | 0.0 | 1 | 0.0016   | 0.00022  | 0.000269 | 1.54e-05 | 0.000492% |
| L195      | False | ABY1    | 6.75e-06 | 0.000615% | 0.0 | 1 | 0.00261  | 0.000704 | 4.2e-05  | 7.87e-06 | 0.000252% |
| L301      | False | ABY1    | 6.74e-06 | 0.000614% | 0.0 | 1 | 0.000767 | 0.00632  | 0.00321  | 2.97e-05 | 0.000951% |
| OTU_8770  | True  | OD1     | 6.73e-06 | 0.000613% | 0.0 | 1 | 0.000182 | 9.86e-06 | 0.0      | 1.47e-05 | 0.000472% |
| OTU_6559  | True  | ZB2     | 6.69e-06 | 0.000609% | 0.0 | 1 | 0.0      | 5.78e-05 | 0.00147  | 1.5e-05  | 0.000481% |
| OTU_170   | True  | koll11  | 6.68e-06 | 0.000608% | 0.0 | 1 | 0.00248  | 0.00029  | 0.000143 | 1.15e-05 | 0.00037%  |
| OTU_6309  | True  | ZB2     | 6.67e-06 | 0.000608% | 0.0 | 1 | 0.000692 | 1.04e-06 | 4.48e-07 | 8.1e-06  | 0.00026%  |
| L702      | False | koll11  | 6.67e-06 | 0.000607% | 0.0 | 1 | 0.00139  | 0.0      | 0.0      | 8.79e-06 | 0.000282% |
| OTU_10859 | True  | OP11    | 6.66e-06 | 0.000607% | 0.0 | 1 | 0.000649 | 1.59e-05 | 5.3e-07  | 1.28e-05 | 0.00041%  |
| L474      | False | OP11-4  | 6.65e-06 | 0.000606% | 0.0 | 1 | 0.00141  | 0.000278 | 7.06e-05 | 7.67e-06 | 0.000246% |
| OTU_8327  | True  | ZB2     | 6.63e-06 | 0.000604% | 0.0 | 1 | 0.0      | 3.3e-05  | 0.000517 | 1.75e-05 | 0.000562% |
| OTU_5589  | True  | OD1     | 6.63e-06 | 0.000604% | 0.0 | 1 | 0.000361 | 1.08e-05 | 3.42e-05 | 1.59e-05 | 0.000509% |
| L658      | False | koll11  | 6.59e-06 | 0.000601% | 0.0 | 1 | 0.0046   | 0.000298 | 0.000982 | 8.9e-06  | 0.000285% |
| L287      | False | ABY1    | 6.59e-06 | 0.0006%   | 0.0 | 1 | 0.000463 | 0.00302  | 0.00271  | 2.6e-05  | 0.000832% |
| L701      | False | koll11  | 6.56e-06 | 0.000598% | 0.0 | 1 | 0.00159  | 2.25e-07 | 0.0      | 7.32e-06 | 0.000234% |
| OTU_6056  | True  | ABY1    | 6.55e-06 | 0.000596% | 0.0 | 1 | 0.00131  | 6.96e-05 | 1.85e-05 | 6.94e-06 | 0.000222% |
| L109      | False | ABY1    | 6.53e-06 | 0.000595% | 0.0 | 1 | 0.00422  | 0.000686 | 0.000409 | 5.25e-06 | 0.000168% |
| L1333     | False | ZB2     | 6.51e-06 | 0.000593% | 0.0 | 1 | 0.00437  | 0.00104  | 0.0005   | 6.89e-06 | 0.000221% |
| L1073     | False | koll11  | 6.5e-06  | 0.000592% | 0.0 | 1 | 0.00252  | 0.00016  | 0.0      | 7.72e-06 | 0.000247% |
| OTU_1389  | True  | GIF10   | 6.45e-06 | 0.000588% | 0.0 | 1 | 0.00104  | 0.000172 | 5.83e-05 | 1.56e-05 | 0.000499% |
| OTU_60    | True  | OD1     | 6.44e-06 | 0.000587% | 0.0 | 1 | 0.000105 | 2.36e-05 | 0.000506 | 2.94e-05 | 0.000943% |
| L717      | False | PBS-25  | 6.35e-06 | 0.000578% | 0.0 | 1 | 0.0353   | 0.00362  | 0.00449  | 5.21e-06 | 0.000167% |
| L1292     | False | TM7-3   | 6.33e-06 | 0.000577% | 0.0 | 1 | 0.00162  | 5.22e-07 | 3.05e-05 | 9.88e-06 | 0.000316% |
| L1887     | False | OD1     | 6.3e-06  | 0.000574% | 0.0 | 1 | 0.000521 | 0.000101 | 2.77e-05 | 1.69e-05 | 0.00054%  |
| OTU_361   | True  | koll11  | 6.29e-06 | 0.000573% | 0.0 | 1 | 0.00123  | 0.000269 | 6.62e-05 | 1.16e-05 | 0.000371% |
| L627      | False | PBS-25  | 6.23e-06 | 0.000567% | 0.0 | 1 | 0.00438  | 0.000157 | 0.000101 | 6.01e-06 | 0.000192% |
| OTU_7480  | True  | ABY1    | 6.22e-06 | 0.000567% | 0.0 | 1 | 0.0      | 0.00103  | 0.000653 | 1.41e-05 | 0.000452% |
| OTU_6096  | True  | ZB2     | 6.2e-06  | 0.000564% | 0.0 | 1 | 0.00484  | 0.00128  | 0.000673 | 1.58e-05 | 0.000506% |
| OTU_162   | True  | OD1     | 6.19e-06 | 0.000564% | 0.0 | 1 | 0.000106 | 0.0      | 0.0      | 1.56e-05 | 0.0005%   |
| L1583     | False | ZB2     | 6.12e-06 | 0.000557% | 0.0 | 1 | 0.00161  | 0.00022  | 0.000499 | 1.8e-05  | 0.000577% |
| OTU_6221  | True  | ZB2     | 6.11e-06 | 0.000557% | 0.0 | 1 | 0.000893 | 5.38e-07 | 0.0      | 1.16e-05 | 0.000371% |
| OTU_7837  | True  | ZB2     | 6.08e-06 | 0.000554% | 0.0 | 1 | 0.000318 | 0.0      | 0.0      | 1.14e-05 | 0.000366% |
| L330      | False | ABY1    | 6.08e-06 | 0.000554% | 0.0 | 1 | 0.00111  | 1.41e-05 | 3.7e-05  | 7.33e-06 | 0.000235% |
| L858      | False | OP3     | 6.06e-06 | 0.000552% | 0.0 | 1 | 0.0187   | 0.00169  | 0.00219  | 3.5e-06  | 0.000112% |
| L1422     | False | ZB2     | 6.03e-06 | 0.000549% | 0.0 | 1 | 5.35e-05 | 0.00269  | 0.00275  | 1.64e-05 | 0.000524% |
| L1688     | False | OD1     | 6.02e-06 | 0.000548% | 0.0 | 1 | 0.014    | 0.00193  | 0.00132  | 2.24e-06 | 7.18e-05% |
| OTU_6269  | True  | OD1     | 6e-06    | 0.000546% | 0.0 | 1 | 0.000163 | 0.0      | 0.000256 | 3.68e-05 | 0.00118%  |
| L1727     | False | Mb-NB09 | 5.99e-06 | 0.000546% | 0.0 | 1 | 0.00356  | 0.000545 | 0.000774 | 1.12e-05 | 0.000359% |
| L1046     | False | koll11  | 5.98e-06 | 0.000545% | 0.0 | 1 | 0.00661  | 0.00109  | 0.000718 | 8.74e-06 | 0.00028%  |
| OTU_7948  | True  | ABY1    | 5.98e-06 | 0.000545% | 0.0 | 1 | 0.000427 | 2.41e-05 | 3.24e-05 | 1.5e-05  | 0.000481% |
| L1059     | False | koll11  | 5.97e-06 | 0.000544% | 0.0 | 1 | 0.000799 | 9.09e-05 | 7.3e-05  | 1.04e-05 | 0.000333% |
| OTU_2333  | True  | PBS-25  | 5.93e-06 | 0.00054%  | 0.0 | 1 | 0.00137  | 3.8e-05  | 0.00018  | 1.55e-05 | 0.000497% |
| OTU_10907 | True  | OP11-4  | 5.93e-06 | 0.00054%  | 0.0 | 1 | 0.000182 | 3.44e-06 | 0.0      | 1.29e-05 | 0.000412% |
| OTU_4604  | True  | ZB2     | 5.92e-06 | 0.00054%  | 0.0 | 1 | 0.000165 | 0.0      | 0.0      | 1.12e-05 | 0.000358% |
| L1554     | False | ZB2     | 5.92e-06 | 0.000539% | 0.0 | 1 | 0.00504  | 0.00132  | 0.000704 | 1.48e-05 | 0.000473% |
| OTU_166   | True  | OP3     | 5.91e-06 | 0.000538% | 0.0 | 1 | 0.000274 | 0.0      | 0.0      | 1.04e-05 | 0.000332% |
| OTU_10120 | True  | OD1     | 5.9e-06  | 0.000538% | 0.0 | 1 | 0.000403 | 0.000136 | 0.0      | 1.86e-05 | 0.000594% |
| L1157     | False | koll11  | 5.9e-06  | 0.000537% | 0.0 | 1 | 0.00278  | 0.000604 | 0.00211  | 4.5e-05  | 0.00144%  |
| OTU_8867  | True  | Mb-NB09 | 5.83e-06 | 0.000531% | 0.0 | 1 | 0.000846 | 5.7e-05  | 0.00068  | 2.61e-05 | 0.000837% |
| OTU_8043  | True  | ABY1    | 5.83e-06 | 0.000531% | 0.0 | 1 | 0.000466 | 0.0      | 0.0      | 1.01e-05 | 0.000322% |
| OTU_6041  | True  | ZB2     | 5.79e-06 | 0.000527% | 0.0 | 1 | 0.00175  | 0.000296 | 0.000935 | 3.35e-05 | 0.00107%  |
| L558      | False | SJA-4   | 5.75e-06 | 0.000524% | 0.0 | 1 | 0.00217  | 0.000134 | 0.000764 | 2.38e-05 | 0.000762% |
| OTU_240   | True  | koll11  | 5.74e-06 | 0.000523% | 0.0 | 1 | 0.00224  | 5.27e-05 | 1.37e-05 | 1.06e-05 | 0.00034%  |
| L305      | False | ABY1    | 5.72e-06 | 0.000521% | 0.0 | 1 | 0.000418 | 0.00631  | 0.00321  | 1.93e-05 | 0.000617% |
| L824      | False | PBS-25  | 5.72e-06 | 0.000521% | 0.0 | 1 | 0.0159   | 0.00134  | 0.00182  | 5.53e-06 | 0.000177% |
| L1874     | False | OD1     | 5.71e-06 | 0.00052%  | 0.0 | 1 | 0.00126  | 0.000384 | 6.74e-05 | 1.13e-05 | 0.000362% |
| L1259     | False | TM7-1   | 5.63e-06 | 0.000513% | 0.0 | 1 | 0.00239  | 0.000317 | 0.000368 | 1.14e-05 | 0.000367% |
| L1208     | False | koll11  | 5.63e-06 | 0.000513% | 0.0 | 1 | 0.000584 | 0.0      | 0.0      | 1.06e-05 | 0.000339% |
| OTU_5822  | True  | OD1     | 5.61e-06 | 0.000511% | 0.0 | 1 | 0.000235 | 2.09e-05 | 0.0      | 7.98e-06 | 0.000256% |
| OTU_10794 | True  | OP11-3  | 5.59e-06 | 0.000509% | 0.0 | 1 | 0.000173 | 0.0      | 0.0      | 1.19e-05 | 0.000381% |
| L954      | False | koll11  | 5.57e-06 | 0.000507% | 0.0 | 1 | 0.00158  | 8.34e-05 | 8.05e-05 | 5.18e-06 | 0.000166% |

|           |       |         |          |           |     |   |          |          |          |          |           |
|-----------|-------|---------|----------|-----------|-----|---|----------|----------|----------|----------|-----------|
| OTU_12    | True  | ZB2     | 5.56e-06 | 0.000507% | 0.0 | 1 | 0.000989 | 0.000174 | 0.000138 | 7.5e-06  | 0.00024%  |
| L1569     | False | ZB2     | 5.52e-06 | 0.000502% | 0.0 | 1 | 0.00295  | 0.00043  | 0.000749 | 7.82e-06 | 0.00025%  |
| OTU_2350  | True  | SJA-4   | 5.51e-06 | 0.000502% | 0.0 | 1 | 0.000685 | 0.0      | 0.0      | 1.14e-05 | 0.000364% |
| OTU_10803 | True  | OP11-4  | 5.5e-06  | 0.000501% | 0.0 | 1 | 0.000278 | 5.21e-06 | 0.0      | 1.14e-05 | 0.000364% |
| OTU_7000  | True  | ZB2     | 5.49e-06 | 0.0005%   | 0.0 | 1 | 1.63e-06 | 0.000768 | 0.000341 | 1.41e-05 | 0.000452% |
| L159      | False | ABY1    | 5.49e-06 | 0.0005%   | 0.0 | 1 | 0.000698 | 0.00013  | 3.57e-05 | 1.77e-05 | 0.000568% |
| OTU_4915  | True  | GIF10   | 5.49e-06 | 0.0005%   | 0.0 | 1 | 0.000795 | 0.000183 | 7.01e-05 | 1.57e-05 | 0.000502% |
| L1864     | False | OD1     | 5.47e-06 | 0.000498% | 0.0 | 1 | 0.0029   | 0.000578 | 0.000261 | 4.92e-06 | 0.000158% |
| OTU_8645  | True  | Mb-NB09 | 5.46e-06 | 0.000498% | 0.0 | 1 | 0.000485 | 5.35e-05 | 4.23e-06 | 7.29e-06 | 0.000234% |
| OTU_6393  | True  | ZB2     | 5.45e-06 | 0.000497% | 0.0 | 1 | 0.000606 | 0.000101 | 0.000116 | 1.64e-05 | 0.000524% |
| OTU_6604  | True  | ZB2     | 5.44e-06 | 0.000496% | 0.0 | 1 | 0.0      | 7.7e-06  | 0.000664 | 1.63e-05 | 0.000522% |
| OTU_5239  | True  | OD1     | 5.44e-06 | 0.000495% | 0.0 | 1 | 0.000726 | 1.68e-05 | 7.6e-06  | 7.41e-06 | 0.000237% |
| OTU_6051  | True  | OD1     | 5.41e-06 | 0.000493% | 0.0 | 1 | 0.000145 | 0.0      | 0.0      | 1.09e-05 | 0.000349% |
| OTU_6230  | True  | ZB2     | 5.39e-06 | 0.000491% | 0.0 | 1 | 0.000163 | 0.0167   | 0.00712  | 1.29e-05 | 0.000413% |
| L956      | False | koll11  | 5.36e-06 | 0.000488% | 0.0 | 1 | 0.00153  | 4.84e-05 | 6.87e-05 | 4.8e-06  | 0.000154% |
| OTU_348   | True  | koll11  | 5.36e-06 | 0.000488% | 0.0 | 1 | 0.000551 | 1.71e-05 | 0.000324 | 2.69e-05 | 0.000861% |
| OTU_9347  | True  | Mb-NB09 | 5.29e-06 | 0.000482% | 0.0 | 1 | 0.000455 | 4.16e-05 | 1.81e-07 | 9.56e-06 | 0.000306% |
| OTU_7046  | True  | ABY1    | 5.28e-06 | 0.000481% | 0.0 | 1 | 0.00101  | 7.15e-05 | 0.0      | 1.26e-05 | 0.000405% |
| OTU_297   | True  | koll11  | 5.27e-06 | 0.00048%  | 0.0 | 1 | 0.00251  | 0.000453 | 0.000274 | 1.01e-05 | 0.000323% |
| OTU_7970  | True  | ABY1    | 5.25e-06 | 0.000478% | 0.0 | 1 | 1.61e-05 | 0.000838 | 0.000431 | 2.31e-05 | 0.000741% |
| L1196     | False | koll11  | 5.25e-06 | 0.000478% | 0.0 | 1 | 0.00314  | 0.000325 | 0.000773 | 8.11e-06 | 0.00026%  |
| OTU_8826  | True  | TM7-1   | 5.24e-06 | 0.000477% | 0.0 | 1 | 0.00053  | 0.0      | 0.0      | 1.07e-05 | 0.000343% |
| OTU_7217  | True  | ZB2     | 5.23e-06 | 0.000477% | 0.0 | 1 | 0.000282 | 0.0      | 0.0      | 9.74e-06 | 0.000312% |
| L398      | False | ABY1    | 5.23e-06 | 0.000476% | 0.0 | 1 | 0.00117  | 2.97e-05 | 0.000159 | 1e-05    | 0.000321% |
| OTU_7379  | True  | ZB2     | 5.21e-06 | 0.000474% | 0.0 | 1 | 0.000311 | 0.0      | 0.0      | 9.76e-06 | 0.000313% |
| L1757     | False | OD1     | 5.2e-06  | 0.000474% | 0.0 | 1 | 0.000542 | 0.0      | 0.000272 | 1.66e-05 | 0.000532% |
| L1181     | False | GIF10   | 5.2e-06  | 0.000473% | 0.0 | 1 | 0.0023   | 0.000271 | 0.000279 | 8.21e-06 | 0.000263% |
| OTU_288   | True  | PBS-25  | 5.19e-06 | 0.000473% | 0.0 | 1 | 0.00213  | 0.000314 | 0.000621 | 1.47e-05 | 0.00047%  |
| OTU_6306  | True  | ZB2     | 5.19e-06 | 0.000473% | 0.0 | 1 | 0.00169  | 0.000102 | 0.000572 | 1.81e-05 | 0.00058%  |
| L426      | False | OP11    | 5.18e-06 | 0.000472% | 0.0 | 1 | 0.00131  | 0.000462 | 0.00142  | 4.6e-05  | 0.00147%  |
| L407      | False | ABY1    | 5.16e-06 | 0.00047%  | 0.0 | 1 | 0.000323 | 9.47e-06 | 1.3e-05  | 1.07e-05 | 0.000343% |
| L299      | False | ABY1    | 5.15e-06 | 0.000469% | 0.0 | 1 | 0.000813 | 0.0113   | 0.00786  | 1.05e-05 | 0.000335% |
| OTU_8139  | True  | EW055   | 5.15e-06 | 0.000469% | 0.0 | 1 | 0.00161  | 5.22e-07 | 3.05e-05 | 8.06e-06 | 0.000258% |
| L1438     | False | ZB2     | 5.14e-06 | 0.000468% | 0.0 | 1 | 0.00203  | 0.000357 | 0.000279 | 1.38e-05 | 0.000443% |
| OTU_8913  | True  | Mb-NB09 | 5.13e-06 | 0.000468% | 0.0 | 1 | 0.000242 | 0.0      | 0.0      | 9.24e-06 | 0.000296% |
| L1730     | False | Mb-NB09 | 5.11e-06 | 0.000466% | 0.0 | 1 | 0.00274  | 0.000478 | 0.000769 | 1.68e-05 | 0.00054%  |
| OTU_6094  | True  | ZB2     | 5.11e-06 | 0.000465% | 0.0 | 1 | 3.06e-05 | 0.00235  | 0.00186  | 1.25e-05 | 0.000401% |
| OTU_8036  | True  | TM7-1   | 5.1e-06  | 0.000465% | 0.0 | 1 | 0.000657 | 3.61e-05 | 4e-06    | 5.81e-06 | 0.000186% |
| OTU_6185  | True  | ABY1    | 5.1e-06  | 0.000464% | 0.0 | 1 | 0.000379 | 0.000107 | 1.45e-05 | 1.85e-05 | 0.000592% |
| L311      | False | ABY1    | 5.04e-06 | 0.000459% | 0.0 | 1 | 2.73e-05 | 0.00157  | 0.0013   | 9.54e-06 | 0.000305% |
| L1080     | False | koll11  | 5.03e-06 | 0.000458% | 0.0 | 1 | 0.0036   | 0.000697 | 0.000403 | 8.9e-06  | 0.000285% |
| OTU_8793  | True  | OD1     | 5.03e-06 | 0.000458% | 0.0 | 1 | 3.99e-06 | 0.000424 | 0.000597 | 1.86e-05 | 0.000596% |
| L1631     | False | ZB2     | 4.97e-06 | 0.000453% | 0.0 | 1 | 0.00345  | 0.000846 | 0.00158  | 2.7e-05  | 0.000865% |
| OTU_1425  | True  | OP3     | 4.97e-06 | 0.000453% | 0.0 | 1 | 0.000395 | 8.72e-05 | 0.0      | 1.12e-05 | 0.00036%  |
| L1673     | False | OD1     | 4.97e-06 | 0.000453% | 0.0 | 1 | 0.00424  | 0.000457 | 0.000757 | 9.2e-06  | 0.000295% |
| L1845     | False | OD1     | 4.94e-06 | 0.00045%  | 0.0 | 1 | 0.00302  | 0.000504 | 0.00056  | 6.14e-06 | 0.000197% |
| L1706     | False | Mb-NB09 | 4.92e-06 | 0.000449% | 0.0 | 1 | 0.00144  | 0.00013  | 4.59e-05 | 5.76e-06 | 0.000184% |
| OTU_5847  | True  | OD1     | 4.91e-06 | 0.000447% | 0.0 | 1 | 0.00039  | 1.27e-05 | 3.69e-05 | 1.26e-05 | 0.000402% |
| OTU_6123  | True  | SM2F11  | 4.9e-06  | 0.000447% | 0.0 | 1 | 0.000268 | 0.0      | 0.0      | 8.56e-06 | 0.000274% |
| OTU_5575  | True  | ZB2     | 4.9e-06  | 0.000446% | 0.0 | 1 | 0.000139 | 0.0      | 7.01e-07 | 1.03e-05 | 0.00033%  |
| OTU_5424  | True  | ZB2     | 4.88e-06 | 0.000444% | 0.0 | 1 | 0.000552 | 9.6e-06  | 7.61e-05 | 9.21e-06 | 0.000295% |
| L132      | False | OD1     | 4.87e-06 | 0.000444% | 0.0 | 1 | 0.0128   | 0.0366   | 0.021    | 3.21e-05 | 0.00103%  |
| L1133     | False | koll11  | 4.87e-06 | 0.000444% | 0.0 | 1 | 0.0016   | 2.68e-05 | 3.97e-05 | 6.9e-06  | 0.000221% |
| L1351     | False | OD1     | 4.86e-06 | 0.000443% | 0.0 | 1 | 0.00352  | 0.00065  | 0.00154  | 2.2e-05  | 0.000706% |
| OTU_67    | True  | ZB2     | 4.86e-06 | 0.000443% | 0.0 | 1 | 8.69e-05 | 0.0154   | 0.0228   | 4e-06    | 0.000128% |
| L1895     | False | OD1     | 4.86e-06 | 0.000442% | 0.0 | 1 | 0.00194  | 0.000394 | 0.000148 | 9.77e-06 | 0.000313% |
| OTU_3671  | True  | kpj58rc | 4.85e-06 | 0.000442% | 0.0 | 1 | 0.000452 | 3.54e-05 | 0.0001   | 8.44e-06 | 0.00027%  |
| OTU_8317  | True  | Mb-NB09 | 4.85e-06 | 0.000442% | 0.0 | 1 | 0.000619 | 0.000234 | 4.13e-05 | 2.04e-05 | 0.000652% |
| OTU_3763  | True  | OP3     | 4.85e-06 | 0.000442% | 0.0 | 1 | 0.000223 | 0.0      | 0.0      | 1.2e-05  | 0.000384% |
| L1565     | False | ZB2     | 4.85e-06 | 0.000442% | 0.0 | 1 | 0.00523  | 0.000929 | 0.000939 | 5.63e-06 | 0.00018%  |
| L207      | False | ABY1    | 4.83e-06 | 0.00044%  | 0.0 | 1 | 0.00167  | 2.23e-05 | 2.26e-05 | 5.21e-06 | 0.000167% |
| OTU_6679  | True  | OD1     | 4.82e-06 | 0.000439% | 0.0 | 1 | 0.00123  | 0.000242 | 0.000156 | 1.99e-05 | 0.000637% |
| L429      | False | OP11    | 4.81e-06 | 0.000438% | 0.0 | 1 | 0.00098  | 5.1e-05  | 0.000189 | 1.2e-05  | 0.000385% |
| OTU_6095  | True  | ZB2     | 4.8e-06  | 0.000437% | 0.0 | 1 | 0.00167  | 0.000255 | 0.000161 | 1.51e-05 | 0.000483% |

|           |       |         |          |           |     |   |          |          |          |          |           |
|-----------|-------|---------|----------|-----------|-----|---|----------|----------|----------|----------|-----------|
| L565      | False | SJA-4   | 4.78e-06 | 0.000435% | 0.0 | 1 | 0.00154  | 4.42e-07 | 0.000581 | 1.99e-05 | 0.000638% |
| OTU_6343  | True  | ZB2     | 4.73e-06 | 0.000431% | 0.0 | 1 | 0.00251  | 0.000905 | 0.00112  | 5.55e-05 | 0.00178%  |
| OTU_7969  | True  | ABY1    | 4.72e-06 | 0.00043%  | 0.0 | 1 | 0.000621 | 0.000246 | 1.12e-05 | 9.73e-06 | 0.000312% |
| L498      | False | OP11-4  | 4.71e-06 | 0.000429% | 0.0 | 1 | 0.000679 | 5.38e-05 | 4.93e-05 | 7.59e-06 | 0.000243% |
| L631      | False | PBS-25  | 4.7e-06  | 0.000429% | 0.0 | 1 | 0.00215  | 8.59e-05 | 9.04e-05 | 1.09e-05 | 0.00035%  |
| OTU_4064  | True  | koll11  | 4.7e-06  | 0.000428% | 0.0 | 1 | 0.000369 | 3.86e-05 | 8.09e-06 | 1.51e-05 | 0.000484% |
| L253      | False | ABY1    | 4.69e-06 | 0.000427% | 0.0 | 1 | 0.000695 | 0.000146 | 2.46e-05 | 9.04e-06 | 0.00029%  |
| L544      | False | SJA-4   | 4.68e-06 | 0.000427% | 0.0 | 1 | 0.00108  | 0.00023  | 0.00213  | 3.47e-05 | 0.00111%  |
| L1553     | False | ZB2     | 4.68e-06 | 0.000426% | 0.0 | 1 | 0.00542  | 0.00132  | 0.000704 | 9.67e-06 | 0.00031%  |
| OTU_499   | True  | PBS-25  | 4.67e-06 | 0.000426% | 0.0 | 1 | 0.000366 | 0.0      | 0.0      | 5.8e-06  | 0.000186% |
| L1182     | False | GIF10   | 4.67e-06 | 0.000425% | 0.0 | 1 | 0.00117  | 8.83e-05 | 0.000209 | 1.61e-05 | 0.000517% |
| OTU_436   | True  | koll11  | 4.67e-06 | 0.000425% | 0.0 | 1 | 0.000451 | 0.0      | 2.25e-06 | 9.98e-06 | 0.00032%  |
| OTU_165   | True  | koll11  | 4.66e-06 | 0.000424% | 0.0 | 1 | 0.0135   | 0.000917 | 0.0021   | 3.37e-06 | 0.000108% |
| OTU_9264  | True  | ABY1    | 4.66e-06 | 0.000424% | 0.0 | 1 | 0.00029  | 2.45e-05 | 3.24e-06 | 1.18e-05 | 0.000378% |
| L917      | False | OP3     | 4.65e-06 | 0.000424% | 0.0 | 1 | 0.000619 | 8.72e-05 | 0.0      | 8.45e-06 | 0.000271% |
| L133      | False | ABY1    | 4.65e-06 | 0.000423% | 0.0 | 1 | 0.00341  | 0.000376 | 0.000421 | 7.52e-06 | 0.000241% |
| L1888     | False | OD1     | 4.62e-06 | 0.000421% | 0.0 | 1 | 0.000379 | 7.48e-05 | 1.05e-05 | 1.31e-05 | 0.000419% |
| L653      | False | koll11  | 4.61e-06 | 0.00042%  | 0.0 | 1 | 0.0162   | 0.00231  | 0.00455  | 2.96e-06 | 9.48e-05% |
| OTU_4014  | True  | GIF10   | 4.6e-06  | 0.000419% | 0.0 | 1 | 0.0      | 3.39e-05 | 0.000469 | 1.73e-05 | 0.000554% |
| L144      | False | ABY1    | 4.6e-06  | 0.000419% | 0.0 | 1 | 0.00286  | 0.00141  | 0.000297 | 2.22e-05 | 0.000711% |
| OTU_6328  | True  | ZB2     | 4.59e-06 | 0.000418% | 0.0 | 1 | 0.0      | 0.00102  | 0.000785 | 1.49e-05 | 0.000477% |
| OTU_7670  | True  | ABY1    | 4.59e-06 | 0.000418% | 0.0 | 1 | 0.000398 | 1.99e-07 | 1.96e-05 | 9.08e-06 | 0.000291% |
| OTU_4797  | True  | koll11  | 4.59e-06 | 0.000418% | 0.0 | 1 | 1.89e-06 | 1.22e-05 | 0.000394 | 1.24e-05 | 0.000397% |
| OTU_571   | True  | koll11  | 4.59e-06 | 0.000418% | 0.0 | 1 | 0.000261 | 0.0      | 0.0      | 8.36e-06 | 0.000268% |
| OTU_173   | True  | PBS-25  | 4.58e-06 | 0.000418% | 0.0 | 1 | 0.00118  | 8.44e-05 | 0.000843 | 3.49e-05 | 0.00112%  |
| OTU_6544  | True  | ZB2     | 4.58e-06 | 0.000418% | 0.0 | 1 | 0.0      | 0.0      | 0.00084  | 1.28e-05 | 0.00041%  |
| L1726     | False | Mb-NB09 | 4.58e-06 | 0.000417% | 0.0 | 1 | 0.00374  | 0.000603 | 0.000939 | 8.36e-06 | 0.000268% |
| L204      | False | ABY1    | 4.55e-06 | 0.000415% | 0.0 | 1 | 0.00192  | 9.63e-05 | 0.00077  | 1.17e-05 | 0.000374% |
| L826      | False | PBS-25  | 4.55e-06 | 0.000414% | 0.0 | 1 | 0.00559  | 0.000528 | 0.00053  | 8.74e-06 | 0.00028%  |
| L1900     | False | OD1     | 4.53e-06 | 0.000413% | 0.0 | 1 | 0.000524 | 0.000172 | 7.38e-05 | 2.25e-05 | 0.000721% |
| OTU_8067  | True  | OD1     | 4.53e-06 | 0.000412% | 0.0 | 1 | 0.000313 | 8.44e-05 | 0.0      | 1.43e-05 | 0.000459% |
| L663      | False | koll11  | 4.52e-06 | 0.000411% | 0.0 | 1 | 0.00317  | 0.000101 | 0.000354 | 6.9e-06  | 0.000221% |
| L1243     | False | TM7-1   | 4.5e-06  | 0.00041%  | 0.0 | 1 | 0.00413  | 0.0117   | 0.00913  | 4.8e-05  | 0.00154%  |
| OTU_753   | True  | koll11  | 4.5e-06  | 0.00041%  | 0.0 | 1 | 0.000497 | 5.38e-06 | 0.0      | 9.63e-06 | 0.000308% |
| OTU_6437  | True  | ZB2     | 4.45e-06 | 0.000405% | 0.0 | 1 | 0.000473 | 1.12e-05 | 8.97e-06 | 5.61e-06 | 0.00018%  |
| L1192     | False | koll11  | 4.41e-06 | 0.000402% | 0.0 | 1 | 0.000582 | 1.44e-05 | 4.3e-05  | 7.04e-06 | 0.000226% |
| L1591     | False | OD1     | 4.4e-06  | 0.000401% | 0.0 | 1 | 0.00194  | 0.00666  | 0.00501  | 3.88e-05 | 0.00124%  |
| OTU_6     | True  | OD1     | 4.37e-06 | 0.000398% | 0.0 | 1 | 0.000111 | 0.0      | 0.0      | 1.07e-05 | 0.000342% |
| OTU_6013  | True  | ABY1    | 4.36e-06 | 0.000397% | 0.0 | 1 | 0.000297 | 0.0      | 4.68e-06 | 6.34e-06 | 0.000203% |
| OTU_6055  | True  | ABY1    | 4.35e-06 | 0.000396% | 0.0 | 1 | 0.000264 | 2.96e-05 | 0.0      | 9.07e-06 | 0.000291% |
| OTU_4583  | True  | ZB2     | 4.34e-06 | 0.000395% | 0.0 | 1 | 0.0011   | 0.000106 | 0.000112 | 1.03e-05 | 0.000331% |
| L1484     | False | ZB2     | 4.34e-06 | 0.000395% | 0.0 | 1 | 0.00401  | 0.000561 | 0.000731 | 6.88e-06 | 0.00022%  |
| OTU_6572  | True  | ZB2     | 4.33e-06 | 0.000395% | 0.0 | 1 | 0.00172  | 0.000189 | 5.1e-05  | 6.57e-06 | 0.000211% |
| OTU_495   | True  | koll11  | 4.33e-06 | 0.000395% | 0.0 | 1 | 0.000899 | 1.89e-05 | 0.0      | 7.29e-06 | 0.000234% |
| L477      | False | OP11-4  | 4.33e-06 | 0.000395% | 0.0 | 1 | 0.000998 | 0.000227 | 5.01e-05 | 7.22e-06 | 0.000231% |
| L770      | False | PBS-25  | 4.32e-06 | 0.000393% | 0.0 | 1 | 0.00411  | 0.00031  | 0.000443 | 8.49e-06 | 0.000272% |
| L636      | False | PBS-25  | 4.31e-06 | 0.000393% | 0.0 | 1 | 0.00106  | 3.56e-05 | 1.06e-05 | 6.21e-06 | 0.000199% |
| OTU_8782  | True  | ABY1    | 4.3e-06  | 0.000392% | 0.0 | 1 | 0.00242  | 9.51e-05 | 0.0      | 8.95e-06 | 0.000287% |
| L1866     | False | OD1     | 4.29e-06 | 0.00039%  | 0.0 | 1 | 0.00149  | 0.000146 | 0.000181 | 6.69e-06 | 0.000214% |
| L15       | False | ABY1    | 4.27e-06 | 0.000389% | 0.0 | 1 | 0.00146  | 5.3e-05  | 0.0      | 6.49e-06 | 0.000208% |
| OTU_861   | True  | PBS-25  | 4.26e-06 | 0.000388% | 0.0 | 1 | 0.000814 | 0.0      | 0.0      | 1.24e-05 | 0.000396% |
| L848      | False | koll11  | 4.24e-06 | 0.000387% | 0.0 | 1 | 0.00697  | 0.000533 | 0.0015   | 1e-05    | 0.000321% |
| L377      | False | ABY1    | 4.24e-06 | 0.000386% | 0.0 | 1 | 0.000378 | 0.0      | 7.42e-08 | 5.99e-06 | 0.000192% |
| OTU_10862 | True  | OP11-4  | 4.21e-06 | 0.000384% | 0.0 | 1 | 0.000846 | 0.000227 | 5.01e-05 | 8.99e-06 | 0.000288% |
| OTU_8108  | True  | ABY1    | 4.2e-06  | 0.000382% | 0.0 | 1 | 0.000234 | 1.43e-05 | 1.81e-07 | 7.35e-06 | 0.000235% |
| OTU_8163  | True  | ABY1    | 4.19e-06 | 0.000382% | 0.0 | 1 | 0.000231 | 4.54e-07 | 0.0      | 7.94e-06 | 0.000254% |
| L1001     | False | koll11  | 4.19e-06 | 0.000382% | 0.0 | 1 | 0.00191  | 0.000373 | 0.00102  | 2.43e-05 | 0.000778% |
| L1062     | False | koll11  | 4.18e-06 | 0.000381% | 0.0 | 1 | 0.00223  | 0.000307 | 0.000678 | 1.44e-05 | 0.000462% |
| L1147     | False | koll11  | 4.18e-06 | 0.000381% | 0.0 | 1 | 0.00329  | 0.000274 | 0.00115  | 1.08e-05 | 0.000345% |
| L506      | False | OP11-4  | 4.17e-06 | 0.00038%  | 0.0 | 1 | 0.00397  | 0.000523 | 0.000706 | 5.66e-06 | 0.000181% |
| L554      | False | SJA-4   | 4.17e-06 | 0.00038%  | 0.0 | 1 | 0.000694 | 6.99e-05 | 5.85e-05 | 1.42e-05 | 0.000456% |
| L1833     | False | OD1     | 4.16e-06 | 0.000379% | 0.0 | 1 | 8.42e-05 | 3.91e-06 | 0.000159 | 2.41e-05 | 0.000771% |
| L1019     | False | koll11  | 4.13e-06 | 0.000376% | 0.0 | 1 | 0.00348  | 0.000616 | 0.000482 | 4.67e-06 | 0.00015%  |
| OTU_8815  | True  | ABY1    | 4.11e-06 | 0.000375% | 0.0 | 1 | 0.000404 | 1.26e-05 | 0.0      | 1.2e-05  | 0.000386% |

|           |       |         |          |           |     |   |          |          |          |          |           |
|-----------|-------|---------|----------|-----------|-----|---|----------|----------|----------|----------|-----------|
| OTU_7853  | True  | ABY1    | 4.11e-06 | 0.000375% | 0.0 | 1 | 0.000816 | 2.24e-05 | 1.94e-05 | 8.3e-06  | 0.000266% |
| L1151     | False | koll11  | 4.09e-06 | 0.000372% | 0.0 | 1 | 0.00218  | 0.000351 | 0.000165 | 8.93e-06 | 0.000286% |
| OTU_8527  | True  | ABY1    | 4.08e-06 | 0.000371% | 0.0 | 1 | 5.04e-06 | 0.000159 | 0.000401 | 1.51e-05 | 0.000483% |
| L1293     | False | TM7-3   | 4.06e-06 | 0.00037%  | 0.0 | 1 | 0.00162  | 5.22e-07 | 3.05e-05 | 6.33e-06 | 0.000203% |
| OTU_4028  | True  | koll11  | 4.06e-06 | 0.00037%  | 0.0 | 1 | 0.000761 | 0.0      | 0.0      | 6.59e-06 | 0.000211% |
| OTU_8299  | True  | ABY1    | 4.06e-06 | 0.00037%  | 0.0 | 1 | 1.66e-05 | 0.00157  | 0.0013   | 7.28e-06 | 0.000233% |
| OTU_335   | True  | koll11  | 4.05e-06 | 0.000369% | 0.0 | 1 | 0.00308  | 0.000402 | 0.000138 | 7.47e-06 | 0.000239% |
| OTU_2521  | True  | koll11  | 4.04e-06 | 0.000368% | 0.0 | 1 | 0.000283 | 1.8e-06  | 3.57e-06 | 9.56e-06 | 0.000306% |
| OTU_1088  | True  | koll11  | 4.03e-06 | 0.000368% | 0.0 | 1 | 0.000632 | 0.0      | 3.57e-06 | 7.53e-06 | 0.000241% |
| L1540     | False | ZB2     | 4.03e-06 | 0.000367% | 0.0 | 1 | 0.000439 | 0.0      | 0.0      | 6.24e-06 | 0.0002%   |
| OTU_7961  | True  | ZB2     | 4.03e-06 | 0.000367% | 0.0 | 1 | 0.000279 | 0.000183 | 1.08e-05 | 1.48e-05 | 0.000475% |
| OTU_1247  | True  | PRR-12  | 4.03e-06 | 0.000367% | 0.0 | 1 | 0.00103  | 5.69e-05 | 2.22e-05 | 8.27e-06 | 0.000265% |
| L718      | False | PBS-25  | 4.03e-06 | 0.000367% | 0.0 | 1 | 0.00295  | 0.000418 | 0.000744 | 8.35e-06 | 0.000267% |
| OTU_1590  | True  | PBS-25  | 4.02e-06 | 0.000366% | 0.0 | 1 | 0.000377 | 1.25e-05 | 0.0      | 8.05e-06 | 0.000258% |
| L433      | False | OP11    | 4.01e-06 | 0.000365% | 0.0 | 1 | 0.00138  | 0.000161 | 0.000672 | 1.5e-05  | 0.000481% |
| L1263     | False | TM7-1   | 3.97e-06 | 0.000362% | 0.0 | 1 | 0.00102  | 0.0      | 0.0      | 5.52e-06 | 0.000177% |
| L198      | False | ABY1    | 3.96e-06 | 0.000361% | 0.0 | 1 | 0.00131  | 0.000342 | 1.12e-05 | 6.42e-06 | 0.000206% |
| OTU_5893  | True  | OD1     | 3.93e-06 | 0.000358% | 0.0 | 1 | 0.000167 | 0.0      | 0.0      | 8.35e-06 | 0.000267% |
| OTU_4041  | True  | koll11  | 3.93e-06 | 0.000358% | 0.0 | 1 | 0.000553 | 0.0      | 0.0      | 8.03e-06 | 0.000257% |
| OTU_9156  | True  | Mb-NB09 | 3.92e-06 | 0.000357% | 0.0 | 1 | 0.000251 | 0.0      | 0.0      | 8.38e-06 | 0.000268% |
| OTU_7122  | True  | ZB2     | 3.92e-06 | 0.000357% | 0.0 | 1 | 0.000288 | 1.89e-05 | 2e-05    | 1.12e-05 | 0.000359% |
| OTU_672   | True  | koll11  | 3.89e-06 | 0.000355% | 0.0 | 1 | 0.000828 | 4.04e-05 | 0.00019  | 1.14e-05 | 0.000365% |
| L1261     | False | TM7-1   | 3.89e-06 | 0.000354% | 0.0 | 1 | 0.00239  | 0.000263 | 7.09e-05 | 4.9e-06  | 0.000157% |
| L1598     | False | OD1     | 3.87e-06 | 0.000353% | 0.0 | 1 | 5.78e-05 | 0.00627  | 0.00345  | 6.64e-06 | 0.000213% |
| OTU_8744  | True  | TM7-1   | 3.85e-06 | 0.000351% | 0.0 | 1 | 0.000134 | 0.0      | 0.0      | 9.33e-06 | 0.000299% |
| L1091     | False | koll11  | 3.84e-06 | 0.00035%  | 0.0 | 1 | 0.0117   | 0.00106  | 0.00237  | 3.98e-06 | 0.000128% |
| L748      | False | PBS-25  | 3.84e-06 | 0.00035%  | 0.0 | 1 | 0.00526  | 0.000519 | 0.00103  | 5.86e-06 | 0.000188% |
| OTU_7233  | True  | ABY1    | 3.84e-06 | 0.00035%  | 0.0 | 1 | 0.00367  | 4.32e-05 | 0.000258 | 5.41e-06 | 0.000173% |
| OTU_10795 | True  | OP11-3  | 3.84e-06 | 0.00035%  | 0.0 | 1 | 7.49e-05 | 0.0      | 0.0      | 1.01e-05 | 0.000323% |
| OTU_6709  | True  | OD1     | 3.83e-06 | 0.000349% | 0.0 | 1 | 0.000225 | 0.0      | 0.0      | 5.23e-06 | 0.000168% |
| OTU_6089  | True  | SM2F11  | 3.82e-06 | 0.000348% | 0.0 | 1 | 0.000295 | 0.0      | 0.0      | 8.99e-06 | 0.000288% |
| OTU_8039  | True  | ABY1    | 3.82e-06 | 0.000348% | 0.0 | 1 | 0.000448 | 0.0      | 0.0      | 6.99e-06 | 0.000224% |
| OTU_140   | True  | OD1     | 3.82e-06 | 0.000348% | 0.0 | 1 | 4.46e-05 | 4.37e-05 | 0.00037  | 2.41e-05 | 0.000771% |
| L1666     | False | OD1     | 3.82e-06 | 0.000348% | 0.0 | 1 | 0.00339  | 0.000892 | 0.000712 | 9.63e-06 | 0.000308% |
| L1239     | False | TM7     | 3.82e-06 | 0.000348% | 0.0 | 1 | 0.00467  | 0.0117   | 0.00913  | 5.45e-05 | 0.00174%  |
| L943      | False | koll11  | 3.82e-06 | 0.000348% | 0.0 | 1 | 0.0102   | 0.00101  | 0.00142  | 2.13e-06 | 6.82e-05% |
| L118      | False | OD1     | 3.81e-06 | 0.000347% | 0.0 | 1 | 0.0156   | 0.0477   | 0.029    | 1.53e-05 | 0.000491% |
| OTU_8224  | True  | ABY1    | 3.81e-06 | 0.000347% | 0.0 | 1 | 0.000114 | 0.0      | 0.0      | 6.79e-06 | 0.000218% |
| L206      | False | ABY1    | 3.81e-06 | 0.000347% | 0.0 | 1 | 0.00192  | 5.4e-05  | 2.26e-05 | 4.27e-06 | 0.000137% |
| OTU_449   | True  | koll11  | 3.79e-06 | 0.000345% | 0.0 | 1 | 0.000405 | 3.96e-05 | 0.000321 | 2.3e-05  | 0.000736% |
| OTU_5236  | True  | OD1     | 3.78e-06 | 0.000345% | 0.0 | 1 | 0.000517 | 1.48e-05 | 3.57e-06 | 4.33e-06 | 0.000139% |
| OTU_315   | True  | PBS-25  | 3.78e-06 | 0.000344% | 0.0 | 1 | 0.00479  | 0.000534 | 9.75e-05 | 3.93e-06 | 0.000126% |
| OTU_57    | True  | Mb-NB09 | 3.77e-06 | 0.000343% | 0.0 | 1 | 5.86e-05 | 6.69e-06 | 0.0      | 1.31e-05 | 0.00042%  |
| OTU_343   | True  | koll11  | 3.77e-06 | 0.000343% | 0.0 | 1 | 0.000861 | 7.32e-05 | 0.000402 | 1.71e-05 | 0.000547% |
| OTU_3125  | True  | koll11  | 3.76e-06 | 0.000343% | 0.0 | 1 | 0.000412 | 2.04e-05 | 2e-05    | 9.48e-06 | 0.000304% |
| L1748     | False | OD1     | 3.75e-06 | 0.000342% | 0.0 | 1 | 0.00156  | 0.000795 | 0.00234  | 4.69e-05 | 0.0015%   |
| OTU_837   | True  | koll11  | 3.73e-06 | 0.00034%  | 0.0 | 1 | 0.000918 | 0.000248 | 0.000109 | 1.89e-05 | 0.000607% |
| L634      | False | PBS-25  | 3.73e-06 | 0.00034%  | 0.0 | 1 | 0.00112  | 4.56e-05 | 1.06e-05 | 5.4e-06  | 0.000173% |
| OTU_7973  | True  | ABY1    | 3.72e-06 | 0.000339% | 0.0 | 1 | 0.0      | 0.000812 | 0.000582 | 1.58e-05 | 0.000505% |
| L1819     | False | OD1     | 3.72e-06 | 0.000339% | 0.0 | 1 | 0.00131  | 5.83e-05 | 3.66e-05 | 6.2e-06  | 0.000199% |
| L1241     | False | TM7     | 3.71e-06 | 0.000338% | 0.0 | 1 | 0.00414  | 0.0117   | 0.00913  | 3.96e-05 | 0.00127%  |
| L102      | False | ABY1    | 3.69e-06 | 0.000337% | 0.0 | 1 | 0.00153  | 5.83e-05 | 1.55e-05 | 4.89e-06 | 0.000157% |
| OTU_9026  | True  | ABY1    | 3.67e-06 | 0.000335% | 0.0 | 1 | 0.000478 | 4.8e-05  | 0.00012  | 8.4e-06  | 0.000269% |
| L1667     | False | OD1     | 3.67e-06 | 0.000335% | 0.0 | 1 | 0.000734 | 0.000184 | 0.0      | 6.42e-06 | 0.000206% |
| L1521     | False | ZB2     | 3.67e-06 | 0.000334% | 0.0 | 1 | 0.00237  | 0.000274 | 0.000102 | 3.64e-06 | 0.000117% |
| L958      | False | koll11  | 3.67e-06 | 0.000334% | 0.0 | 1 | 0.000845 | 2.78e-05 | 6.27e-05 | 6.29e-06 | 0.000201% |
| OTU_8643  | True  | ABY1    | 3.65e-06 | 0.000332% | 0.0 | 1 | 0.000349 | 6.74e-06 | 7e-06    | 6.42e-06 | 0.000206% |
| L196      | False | ABY1    | 3.64e-06 | 0.000332% | 0.0 | 1 | 0.00154  | 0.000343 | 1.12e-05 | 5.64e-06 | 0.000181% |
| OTU_8146  | True  | ABY1    | 3.64e-06 | 0.000331% | 0.0 | 1 | 0.000186 | 0.0      | 0.0      | 7.63e-06 | 0.000245% |
| OTU_6315  | True  | K2-4-19 | 3.63e-06 | 0.00033%  | 0.0 | 1 | 0.00023  | 0.0      | 0.0      | 6.8e-06  | 0.000218% |
| L460      | False | OP11-4  | 3.61e-06 | 0.000329% | 0.0 | 1 | 0.000804 | 0.00012  | 0.000108 | 8.02e-06 | 0.000257% |
| OTU_8122  | True  | ABY1    | 3.61e-06 | 0.000329% | 0.0 | 1 | 0.000251 | 1.57e-05 | 0.0      | 7.38e-06 | 0.000237% |
| L86       | False | ABY1    | 3.6e-06  | 0.000328% | 0.0 | 1 | 0.00111  | 7.15e-05 | 0.0      | 7.32e-06 | 0.000234% |
| L500      | False | OP11-4  | 3.58e-06 | 0.000326% | 0.0 | 1 | 0.000391 | 5.21e-06 | 0.0      | 5.36e-06 | 0.000172% |
| OTU_310   | True  | koll11  | 3.58e-06 | 0.000326% | 0.0 | 1 | 0.000891 | 2.68e-05 | 3.97e-05 | 9.08e-06 | 0.000291% |

|          |       |         |          |           |     |   |          |          |          |          |           |
|----------|-------|---------|----------|-----------|-----|---|----------|----------|----------|----------|-----------|
| L353     | False | OD1     | 3.58e-06 | 0.000326% | 0.0 | 1 | 0.000431 | 9.16e-05 | 1.53e-05 | 1.15e-05 | 0.000369% |
| OTU_1020 | True  | PBS-25  | 3.57e-06 | 0.000325% | 0.0 | 1 | 0.000454 | 0.0      | 3.57e-05 | 8.42e-06 | 0.00027%  |
| OTU_6634 | True  | K2-4-19 | 3.56e-06 | 0.000325% | 0.0 | 1 | 0.000295 | 7.75e-06 | 0.0      | 4.17e-06 | 0.000133% |
| OTU_6567 | True  | ZB2     | 3.56e-06 | 0.000324% | 0.0 | 1 | 0.00175  | 0.000246 | 0.000489 | 1.42e-05 | 0.000453% |
| L1144    | False | koll11  | 3.54e-06 | 0.000323% | 0.0 | 1 | 0.00412  | 0.000451 | 0.00133  | 8.21e-06 | 0.000263% |
| OTU_6088 | True  | ABY1    | 3.54e-06 | 0.000323% | 0.0 | 1 | 0.000626 | 9.19e-05 | 3.87e-05 | 1.13e-05 | 0.000362% |
| L252     | False | ABY1    | 3.54e-06 | 0.000323% | 0.0 | 1 | 0.000695 | 0.000146 | 4.93e-05 | 7.85e-06 | 0.000251% |
| L1504    | False | ZB2     | 3.53e-06 | 0.000322% | 0.0 | 1 | 0.000213 | 9.09e-07 | 0.0      | 9.46e-06 | 0.000303% |
| L242     | False | ABY1    | 3.53e-06 | 0.000321% | 0.0 | 1 | 0.00759  | 0.00142  | 0.00124  | 6.24e-06 | 0.0002%   |
| L463     | False | OP11-4  | 3.53e-06 | 0.000321% | 0.0 | 1 | 0.000358 | 0.000103 | 5.43e-06 | 1.11e-05 | 0.000355% |
| L1219    | False | koll11  | 3.51e-06 | 0.00032%  | 0.0 | 1 | 0.000181 | 0.0      | 0.0      | 8.07e-06 | 0.000258% |
| OTU_5443 | True  | ZB2     | 3.5e-06  | 0.000319% | 0.0 | 1 | 0.000774 | 0.000385 | 0.000185 | 2.22e-05 | 0.000713% |
| L1186    | False | GIF10   | 3.49e-06 | 0.000318% | 0.0 | 1 | 0.000343 | 0.0      | 0.0      | 5.01e-06 | 0.000161% |
| OTU_6922 | True  | OD1     | 3.48e-06 | 0.000317% | 0.0 | 1 | 0.000272 | 0.0      | 3.24e-05 | 6.97e-06 | 0.000223% |
| OTU_1101 | True  | koll11  | 3.47e-06 | 0.000316% | 0.0 | 1 | 0.00157  | 0.000157 | 0.000413 | 1.29e-05 | 0.000412% |
| L1763    | False | OD1     | 3.45e-06 | 0.000315% | 0.0 | 1 | 0.000313 | 4.37e-05 | 0.000379 | 3.33e-05 | 0.00107%  |
| L935     | False | koll11  | 3.45e-06 | 0.000314% | 0.0 | 1 | 0.00101  | 2.41e-05 | 0.0      | 5.07e-06 | 0.000162% |
| L1529    | False | ZB2     | 3.45e-06 | 0.000314% | 0.0 | 1 | 0.000972 | 0.000437 | 0.000194 | 1.59e-05 | 0.000509% |
| L1703    | False | OD1     | 3.45e-06 | 0.000314% | 0.0 | 1 | 0.00104  | 5.9e-05  | 0.0      | 5.65e-06 | 0.000181% |
| OTU_29   | True  | ZB2     | 3.42e-06 | 0.000311% | 0.0 | 1 | 0.00176  | 0.000247 | 0.000588 | 8.72e-06 | 0.000279% |
| OTU_5495 | True  | ZB2     | 3.42e-06 | 0.000311% | 0.0 | 1 | 0.000687 | 6.32e-05 | 9.89e-06 | 7.17e-06 | 0.00023%  |
| OTU_9271 | True  | ABY1    | 3.41e-06 | 0.000311% | 0.0 | 1 | 0.000126 | 0.0      | 0.0      | 6.97e-06 | 0.000223% |
| OTU_907  | True  | koll11  | 3.41e-06 | 0.00031%  | 0.0 | 1 | 0.00369  | 0.000222 | 0.000955 | 5.71e-06 | 0.000183% |
| L1564    | False | ZB2     | 3.4e-06  | 0.00031%  | 0.0 | 1 | 0.00542  | 0.000929 | 0.000943 | 3.71e-06 | 0.000119% |
| L586     | False | PRR-12  | 3.39e-06 | 0.000309% | 0.0 | 1 | 0.00217  | 7.07e-05 | 1.6e-05  | 3.6e-06  | 0.000115% |
| OTU_7009 | True  | ZB2     | 3.39e-06 | 0.000308% | 0.0 | 1 | 0.000419 | 0.0      | 0.0      | 6.9e-06  | 0.000221% |
| OTU_371  | True  | koll11  | 3.39e-06 | 0.000308% | 0.0 | 1 | 0.000655 | 0.000122 | 0.000339 | 2.06e-05 | 0.00066%  |
| OTU_451  | True  | PRR-10  | 3.38e-06 | 0.000308% | 0.0 | 1 | 0.00962  | 0.00117  | 0.000595 | 3.9e-06  | 0.000125% |
| L1628    | False | ZB2     | 3.36e-06 | 0.000306% | 0.0 | 1 | 0.00478  | 0.000863 | 0.00177  | 1.01e-05 | 0.000325% |
| L1623    | False | OD1     | 3.36e-06 | 0.000306% | 0.0 | 1 | 0.000303 | 3.78e-05 | 6.17e-05 | 1.14e-05 | 0.000365% |
| OTU_608  | True  | koll11  | 3.35e-06 | 0.000306% | 0.0 | 1 | 0.00377  | 0.000309 | 0.00101  | 5.81e-06 | 0.000186% |
| OTU_9291 | True  | ABY1    | 3.35e-06 | 0.000305% | 0.0 | 1 | 0.000277 | 2.57e-05 | 0.0      | 9.03e-06 | 0.000289% |
| L886     | False | koll11  | 3.33e-06 | 0.000304% | 0.0 | 1 | 0.00168  | 0.000428 | 0.000324 | 9.71e-06 | 0.000311% |
| L1200    | False | koll11  | 3.33e-06 | 0.000303% | 0.0 | 1 | 0.00173  | 8.37e-05 | 0.000131 | 4.04e-06 | 0.000129% |
| OTU_437  | True  | PBS-25  | 3.32e-06 | 0.000303% | 0.0 | 1 | 0.000361 | 0.0      | 1.78e-05 | 7.08e-06 | 0.000227% |
| OTU_3064 | True  | koll11  | 3.32e-06 | 0.000302% | 0.0 | 1 | 0.000734 | 7.07e-05 | 4.24e-05 | 5.82e-06 | 0.000187% |
| OTU_8664 | True  | OD1     | 3.29e-06 | 0.0003%   | 0.0 | 1 | 0.000117 | 1.34e-06 | 0.0      | 8.92e-06 | 0.000286% |
| L339     | False | OD1     | 3.28e-06 | 0.000299% | 0.0 | 1 | 0.000787 | 5.76e-05 | 1.15e-05 | 7.3e-06  | 0.000234% |
| OTU_5449 | True  | OD1     | 3.28e-06 | 0.000299% | 0.0 | 1 | 0.000764 | 0.000117 | 4.34e-05 | 6.19e-06 | 0.000198% |
| L1201    | False | koll11  | 3.27e-06 | 0.000298% | 0.0 | 1 | 0.00132  | 6.33e-05 | 0.000111 | 4.76e-06 | 0.000152% |
| L1525    | False | ZB2     | 3.26e-06 | 0.000297% | 0.0 | 1 | 0.000509 | 8.49e-05 | 5.06e-05 | 7.82e-06 | 0.000251% |
| L1670    | False | OD1     | 3.25e-06 | 0.000296% | 0.0 | 1 | 0.00266  | 0.000708 | 0.000712 | 1.44e-05 | 0.000461% |
| OTU_4757 | True  | ZB2     | 3.25e-06 | 0.000296% | 0.0 | 1 | 0.000397 | 0.000348 | 2.52e-05 | 2.23e-05 | 0.000714% |
| L550     | False | SJA-4   | 3.24e-06 | 0.000295% | 0.0 | 1 | 0.000643 | 0.0      | 0.000153 | 1.22e-05 | 0.00039%  |
| OTU_8832 | True  | Mb-NB09 | 3.23e-06 | 0.000295% | 0.0 | 1 | 0.00056  | 8.14e-06 | 2.3e-05  | 8.24e-06 | 0.000264% |
| OTU_5902 | True  | OD1     | 3.23e-06 | 0.000294% | 0.0 | 1 | 0.000443 | 2.25e-07 | 6.97e-06 | 4.65e-06 | 0.000149% |
| OTU_9077 | True  | OD1     | 3.23e-06 | 0.000294% | 0.0 | 1 | 0.000404 | 0.0      | 3.57e-06 | 9.05e-06 | 0.00029%  |
| L178     | False | SM2F11  | 3.23e-06 | 0.000294% | 0.0 | 1 | 0.000582 | 8.3e-05  | 0.000236 | 1.16e-05 | 0.000371% |
| OTU_996  | True  | PBS-25  | 3.23e-06 | 0.000294% | 0.0 | 1 | 0.000643 | 2.03e-05 | 0.0      | 6.34e-06 | 0.000203% |
| OTU_7174 | True  | OD1     | 3.21e-06 | 0.000293% | 0.0 | 1 | 0.00226  | 0.000219 | 0.000371 | 4.18e-06 | 0.000134% |
| OTU_7138 | True  | ABY1    | 3.21e-06 | 0.000292% | 0.0 | 1 | 6.69e-05 | 1.34e-05 | 0.000995 | 9.78e-06 | 0.000313% |
| L1762    | False | OD1     | 3.2e-06  | 0.000292% | 0.0 | 1 | 0.000419 | 4.37e-05 | 0.000379 | 2.57e-05 | 0.000823% |
| OTU_2347 | True  | SJA-4   | 3.2e-06  | 0.000292% | 0.0 | 1 | 0.000694 | 6.99e-05 | 5.71e-05 | 1.09e-05 | 0.000349% |
| L1084    | False | koll11  | 3.2e-06  | 0.000291% | 0.0 | 1 | 0.00318  | 0.000635 | 0.000361 | 5.79e-06 | 0.000185% |
| OTU_268  | True  | koll11  | 3.2e-06  | 0.000291% | 0.0 | 1 | 0.000873 | 0.000191 | 4.62e-05 | 7.29e-06 | 0.000233% |
| OTU_395  | True  | koll11  | 3.18e-06 | 0.00029%  | 0.0 | 1 | 0.00109  | 3.68e-05 | 8.83e-05 | 4.6e-06  | 0.000147% |
| OTU_552  | True  | koll11  | 3.18e-06 | 0.00029%  | 0.0 | 1 | 0.00063  | 8.13e-05 | 2.05e-05 | 1.18e-05 | 0.000377% |
| OTU_600  | True  | PBS-25  | 3.18e-06 | 0.00029%  | 0.0 | 1 | 0.000521 | 4.1e-06  | 3.14e-05 | 7.44e-06 | 0.000238% |
| OTU_430  | True  | PBS-25  | 3.17e-06 | 0.000289% | 0.0 | 1 | 0.00307  | 0.000298 | 0.000941 | 8.41e-06 | 0.000269% |
| OTU_35   | True  | GIF10   | 3.15e-06 | 0.000287% | 0.0 | 1 | 0.000849 | 0.0      | 1.48e-07 | 5.04e-06 | 0.000161% |
| L1272    | False | TM7     | 3.14e-06 | 0.000286% | 0.0 | 1 | 0.000385 | 6.43e-07 | 2.07e-05 | 5.62e-06 | 0.00018%  |
| OTU_6662 | True  | ZB2     | 3.14e-06 | 0.000286% | 0.0 | 1 | 7.37e-07 | 0.000503 | 0.00132  | 1.01e-05 | 0.000325% |
| OTU_833  | True  | koll11  | 3.13e-06 | 0.000285% | 0.0 | 1 | 0.00117  | 1.09e-05 | 1.87e-05 | 3.29e-06 | 0.000105% |
| L1134    | False | koll11  | 3.12e-06 | 0.000285% | 0.0 | 1 | 0.00115  | 2.68e-05 | 3.97e-05 | 5.94e-06 | 0.00019%  |
| OTU_9016 | True  | ABY1    | 3.11e-06 | 0.000284% | 0.0 | 1 | 0.00024  | 1.93e-05 | 7.42e-08 | 6.52e-06 | 0.000209% |

|           |       |         |          |           |     |   |          |          |          |          |           |
|-----------|-------|---------|----------|-----------|-----|---|----------|----------|----------|----------|-----------|
| L1354     | False | ZB2     | 3.11e-06 | 0.000283% | 0.0 | 1 | 0.00323  | 0.00065  | 0.00118  | 1.34e-05 | 0.00043%  |
| OTU_1263  | True  | PBS-25  | 3.1e-06  | 0.000283% | 0.0 | 1 | 0.000452 | 0.0      | 0.0      | 6.64e-06 | 0.000213% |
| OTU_6568  | True  | ZB2     | 3.1e-06  | 0.000282% | 0.0 | 1 | 0.000243 | 0.0      | 0.0      | 5.72e-06 | 0.000183% |
| OTU_2207  | True  | PBS-25  | 3.08e-06 | 0.000281% | 0.0 | 1 | 0.00184  | 0.000117 | 0.000154 | 1.08e-05 | 0.000345% |
| OTU_7944  | True  | ABY1    | 3.07e-06 | 0.00028%  | 0.0 | 1 | 0.000502 | 0.0      | 3.1e-05  | 7.12e-06 | 0.000228% |
| OTU_7945  | True  | ABY1    | 3.06e-06 | 0.000279% | 0.0 | 1 | 0.000427 | 1.04e-05 | 2.25e-05 | 6.66e-06 | 0.000213% |
| L1896     | False | OD1     | 3.05e-06 | 0.000278% | 0.0 | 1 | 0.00106  | 0.000176 | 3.49e-05 | 5.35e-06 | 0.000171% |
| OTU_5654  | True  | OD1     | 3.05e-06 | 0.000278% | 0.0 | 1 | 0.000119 | 0.0      | 0.0      | 6.55e-06 | 0.00021%  |
| OTU_7327  | True  | ABY1    | 3.05e-06 | 0.000278% | 0.0 | 1 | 4.73e-07 | 0.000657 | 9.38e-05 | 5.46e-06 | 0.000175% |
| L1516     | False | OD1     | 3.04e-06 | 0.000277% | 0.0 | 1 | 0.000618 | 0.000173 | 0.00129  | 1.86e-05 | 0.000596% |
| L1612     | False | ZB2     | 3.03e-06 | 0.000276% | 0.0 | 1 | 0.00142  | 0.000106 | 3.2e-05  | 4.07e-06 | 0.00013%  |
| OTU_8249  | True  | ABY1    | 3.03e-06 | 0.000276% | 0.0 | 1 | 0.00197  | 0.000404 | 0.000239 | 1.03e-05 | 0.000329% |
| OTU_299   | True  | PBS-25  | 3.03e-06 | 0.000276% | 0.0 | 1 | 0.00139  | 0.000268 | 0.000286 | 8.22e-06 | 0.000263% |
| OTU_9728  | True  | ZB2     | 3.02e-06 | 0.000275% | 0.0 | 1 | 0.000159 | 1.1e-05  | 0.0      | 8.02e-06 | 0.000257% |
| L657      | False | koll11  | 3.02e-06 | 0.000275% | 0.0 | 1 | 0.00496  | 0.000334 | 0.00101  | 3.95e-06 | 0.000127% |
| OTU_7005  | True  | ZB2     | 3.01e-06 | 0.000274% | 0.0 | 1 | 0.000312 | 0.0      | 0.0      | 6.51e-06 | 0.000208% |
| L1077     | False | koll11  | 2.99e-06 | 0.000272% | 0.0 | 1 | 0.00208  | 0.000143 | 0.0      | 4.86e-06 | 0.000156% |
| OTU_2705  | True  | SJA-4   | 2.99e-06 | 0.000272% | 0.0 | 1 | 0.000173 | 0.0      | 2.15e-05 | 8.17e-06 | 0.000262% |
| OTU_5493  | True  | ZB2     | 2.99e-06 | 0.000272% | 0.0 | 1 | 0.00066  | 0.0      | 0.0      | 3.64e-06 | 0.000116% |
| OTU_7212  | True  | ZB2     | 2.98e-06 | 0.000272% | 0.0 | 1 | 0.000173 | 5.08e-06 | 2.99e-07 | 6.76e-06 | 0.000217% |
| OTU_5588  | True  | OD1     | 2.96e-06 | 0.00027%  | 0.0 | 1 | 0.000722 | 1.68e-05 | 1.1e-05  | 5.31e-06 | 0.00017%  |
| L1517     | False | OD1     | 2.95e-06 | 0.000269% | 0.0 | 1 | 0.000618 | 0.000173 | 0.00129  | 1.81e-05 | 0.00058%  |
| L1643     | False | ZB2     | 2.94e-06 | 0.000267% | 0.0 | 1 | 0.00117  | 0.000307 | 0.00104  | 2.17e-05 | 0.000696% |
| L1858     | False | OD1     | 2.94e-06 | 0.000267% | 0.0 | 1 | 0.000302 | 1.04e-06 | 1.96e-05 | 5.18e-06 | 0.000166% |
| OTU_5240  | True  | ZB2     | 2.93e-06 | 0.000267% | 0.0 | 1 | 0.000409 | 0.000141 | 9.16e-06 | 9.19e-06 | 0.000295% |
| OTU_8868  | True  | ABY1    | 2.92e-06 | 0.000266% | 0.0 | 1 | 0.000152 | 2.15e-05 | 8.39e-07 | 7.03e-06 | 0.000225% |
| OTU_7383  | True  | ABY1    | 2.92e-06 | 0.000266% | 0.0 | 1 | 0.000279 | 2.42e-05 | 0.0      | 6.79e-06 | 0.000217% |
| OTU_7983  | True  | ABY1    | 2.91e-06 | 0.000265% | 0.0 | 1 | 0.0      | 0.000454 | 0.000443 | 1.44e-05 | 0.00046%  |
| L1695     | False | Mb-NB09 | 2.9e-06  | 0.000265% | 0.0 | 1 | 0.00111  | 0.000293 | 5.92e-05 | 5.12e-06 | 0.000164% |
| OTU_4894  | True  | GIF10   | 2.9e-06  | 0.000265% | 0.0 | 1 | 0.000222 | 0.0      | 0.0      | 6.19e-06 | 0.000198% |
| L238      | False | ABY1    | 2.89e-06 | 0.000263% | 0.0 | 1 | 0.000864 | 2.25e-06 | 2.87e-05 | 5.59e-06 | 0.000179% |
| OTU_2634  | True  | PBS-25  | 2.88e-06 | 0.000263% | 0.0 | 1 | 0.00332  | 0.000468 | 0.000545 | 7.2e-06  | 0.000231% |
| L662      | False | koll11  | 2.88e-06 | 0.000262% | 0.0 | 1 | 0.00341  | 0.000153 | 0.000515 | 4.2e-06  | 0.000135% |
| OTU_6057  | True  | ABY1    | 2.87e-06 | 0.000262% | 0.0 | 1 | 0.000377 | 8.8e-05  | 0.0      | 1.34e-05 | 0.000428% |
| OTU_7975  | True  | ABY1    | 2.87e-06 | 0.000262% | 0.0 | 1 | 0.00109  | 0.000246 | 7.16e-06 | 6.72e-06 | 0.000215% |
| OTU_463   | True  | koll11  | 2.87e-06 | 0.000261% | 0.0 | 1 | 0.00044  | 3.85e-05 | 3.45e-05 | 7.06e-06 | 0.000226% |
| OTU_10779 | True  | OP11-4  | 2.86e-06 | 0.000261% | 0.0 | 1 | 0.000922 | 0.00016  | 5.12e-05 | 4.66e-06 | 0.000149% |
| OTU_5515  | True  | ZB2     | 2.86e-06 | 0.00026%  | 0.0 | 1 | 0.000356 | 2.04e-06 | 7.01e-07 | 6.35e-06 | 0.000203% |
| L878      | False | koll11  | 2.85e-06 | 0.00026%  | 0.0 | 1 | 0.00774  | 0.00156  | 0.00297  | 4.29e-06 | 0.000137% |
| OTU_6469  | True  | OD1     | 2.85e-06 | 0.000259% | 0.0 | 1 | 0.00312  | 0.000256 | 0.000324 | 5.69e-06 | 0.000182% |
| L1850     | False | OD1     | 2.82e-06 | 0.000257% | 0.0 | 1 | 0.000309 | 9.86e-06 | 8.21e-05 | 1.08e-05 | 0.000346% |
| OTU_6591  | True  | ZB2     | 2.81e-06 | 0.000256% | 0.0 | 1 | 0.000333 | 0.0      | 0.0      | 5.74e-06 | 0.000184% |
| OTU_4491  | True  | koll11  | 2.81e-06 | 0.000256% | 0.0 | 1 | 0.000263 | 0.0      | 0.0      | 6e-06    | 0.000192% |
| L911      | False | koll11  | 2.8e-06  | 0.000255% | 0.0 | 1 | 0.00101  | 0.000157 | 0.000352 | 1.03e-05 | 0.000331% |
| L1100     | False | koll11  | 2.79e-06 | 0.000254% | 0.0 | 1 | 0.00171  | 0.000125 | 0.000683 | 9.67e-06 | 0.00031%  |
| OTU_5931  | True  | OD1     | 2.78e-06 | 0.000254% | 0.0 | 1 | 0.000912 | 0.000146 | 8.84e-05 | 7.19e-06 | 0.00023%  |
| L1803     | False | OD1     | 2.78e-06 | 0.000253% | 0.0 | 1 | 0.000716 | 0.0      | 0.0      | 3.67e-06 | 0.000117% |
| L1339     | False | ZB2     | 2.78e-06 | 0.000253% | 0.0 | 1 | 0.00161  | 0.000595 | 0.000221 | 8.14e-06 | 0.000261% |
| L734      | False | PBS-25  | 2.78e-06 | 0.000253% | 0.0 | 1 | 0.00618  | 0.000802 | 0.000384 | 2.67e-06 | 8.55e-05% |
| OTU_7843  | True  | ABY1    | 2.75e-06 | 0.00025%  | 0.0 | 1 | 0.00324  | 0.00136  | 0.000196 | 9.76e-06 | 0.000313% |
| OTU_6966  | True  | OD1     | 2.74e-06 | 0.00025%  | 0.0 | 1 | 0.000273 | 0.0      | 0.0      | 5.56e-06 | 0.000178% |
| OTU_8786  | True  | ABY1    | 2.74e-06 | 0.000249% | 0.0 | 1 | 7.36e-05 | 0.000316 | 5.86e-06 | 1.4e-05  | 0.000449% |
| OTU_52    | True  | ZB2     | 2.72e-06 | 0.000248% | 0.0 | 1 | 0.000167 | 9.04e-06 | 0.0      | 6.61e-06 | 0.000212% |
| L754      | False | PBS-25  | 2.72e-06 | 0.000247% | 0.0 | 1 | 0.00161  | 0.000149 | 9.12e-05 | 4.77e-06 | 0.000153% |
| L1773     | False | OD1     | 2.71e-06 | 0.000247% | 0.0 | 1 | 0.000668 | 0.000112 | 7.25e-05 | 6.48e-06 | 0.000207% |
| OTU_6779  | True  | ZB2     | 2.7e-06  | 0.000246% | 0.0 | 1 | 4.67e-06 | 0.0      | 0.00023  | 6.66e-06 | 0.000213% |
| OTU_5995  | True  | SM2F11  | 2.7e-06  | 0.000246% | 0.0 | 1 | 0.000244 | 4.01e-05 | 0.000206 | 1.86e-05 | 0.000595% |
| OTU_7343  | True  | ABY1    | 2.69e-06 | 0.000245% | 0.0 | 1 | 4.73e-07 | 0.000781 | 0.00113  | 1.12e-05 | 0.000358% |
| L740      | False | PBS-25  | 2.68e-06 | 0.000244% | 0.0 | 1 | 0.00137  | 9.48e-05 | 0.00119  | 1.81e-05 | 0.000581% |
| OTU_7592  | True  | ZB2     | 2.67e-06 | 0.000243% | 0.0 | 1 | 0.0      | 0.0      | 0.000306 | 6.08e-06 | 0.000195% |
| L1746     | False | OD1     | 2.67e-06 | 0.000243% | 0.0 | 1 | 0.00162  | 0.000914 | 0.00235  | 4.03e-05 | 0.00129%  |
| OTU_328   | True  | koll11  | 2.67e-06 | 0.000243% | 0.0 | 1 | 0.000398 | 0.0      | 0.0      | 5.53e-06 | 0.000177% |
| L1114     | False | koll11  | 2.67e-06 | 0.000243% | 0.0 | 1 | 0.00399  | 0.000176 | 0.000525 | 3.59e-06 | 0.000115% |
| L1340     | False | ZB2     | 2.65e-06 | 0.000242% | 0.0 | 1 | 0.000973 | 0.000508 | 4.41e-05 | 8.29e-06 | 0.000265% |
| OTU_5343  | True  | ZB2     | 2.65e-06 | 0.000241% | 0.0 | 1 | 0.000655 | 8.49e-05 | 2.84e-05 | 5.65e-06 | 0.000181% |



|           |       |          |          |           |     |   |          |          |          |          |           |
|-----------|-------|----------|----------|-----------|-----|---|----------|----------|----------|----------|-----------|
| L1616     | False | ZB2      | 2.64e-06 | 0.00024%  | 0.0 | 1 | 0.000574 | 2.36e-05 | 5.9e-05  | 6.66e-06 | 0.000213% |
| OTU_7231  | True  | ABY1     | 2.64e-06 | 0.00024%  | 0.0 | 1 | 0.000274 | 0.0      | 0.0      | 4.03e-06 | 0.000129% |
| L1075     | False | koll11   | 2.63e-06 | 0.00024%  | 0.0 | 1 | 0.00232  | 0.000143 | 0.0      | 3.66e-06 | 0.000117% |
| OTU_227   | True  | koll11   | 2.62e-06 | 0.000239% | 0.0 | 1 | 0.00183  | 0.000267 | 0.000357 | 9.19e-06 | 0.000295% |
| OTU_1449  | True  | PBS-25   | 2.62e-06 | 0.000239% | 0.0 | 1 | 0.0133   | 0.00147  | 0.00466  | 4.46e-06 | 0.000143% |
| OTU_1583  | True  | koll11   | 2.61e-06 | 0.000238% | 0.0 | 1 | 0.00026  | 4.06e-06 | 1.57e-05 | 6.09e-06 | 0.000195% |
| L1202     | False | koll11   | 2.61e-06 | 0.000238% | 0.0 | 1 | 0.00112  | 5.12e-05 | 9.29e-05 | 4.49e-06 | 0.000144% |
| L772      | False | PBS-25   | 2.6e-06  | 0.000237% | 0.0 | 1 | 0.00365  | 0.00031  | 0.000408 | 5.65e-06 | 0.000181% |
| OTU_5490  | True  | Mb-NB09  | 2.6e-06  | 0.000237% | 0.0 | 1 | 0.000726 | 5.77e-05 | 0.0      | 6.19e-06 | 0.000198% |
| OTU_8208  | True  | ABY1     | 2.59e-06 | 0.000236% | 0.0 | 1 | 7.58e-05 | 0.0      | 8.63e-06 | 7.45e-06 | 0.000239% |
| L655      | False | koll11   | 2.58e-06 | 0.000235% | 0.0 | 1 | 0.00784  | 0.000607 | 0.00198  | 2.14e-06 | 6.86e-05% |
| OTU_5881  | True  | OD1      | 2.58e-06 | 0.000235% | 0.0 | 1 | 0.000706 | 0.000209 | 0.000257 | 1.2e-05  | 0.000384% |
| OTU_6598  | True  | ZB2      | 2.58e-06 | 0.000235% | 0.0 | 1 | 0.0      | 0.000236 | 0.000791 | 7.5e-06  | 0.00024%  |
| OTU_7959  | True  | ABY1     | 2.57e-06 | 0.000234% | 0.0 | 1 | 0.000574 | 0.0      | 0.0      | 4.24e-06 | 0.000136% |
| OTU_7052  | True  | ABY1     | 2.56e-06 | 0.000233% | 0.0 | 1 | 0.00105  | 9.87e-05 | 0.0      | 6.56e-06 | 0.00021%  |
| L1121     | False | koll11   | 2.55e-06 | 0.000232% | 0.0 | 1 | 0.00155  | 0.000101 | 0.000116 | 3.98e-06 | 0.000128% |
| OTU_1282  | True  | PRR-12   | 2.53e-06 | 0.000231% | 0.0 | 1 | 0.000665 | 4.65e-05 | 2e-06    | 5.49e-06 | 0.000176% |
| OTU_9070  | True  | ABY1     | 2.53e-06 | 0.000231% | 0.0 | 1 | 5.1e-06  | 0.000283 | 0.00028  | 1.23e-05 | 0.000394% |
| L202      | False | ABY1     | 2.53e-06 | 0.00023%  | 0.0 | 1 | 0.00289  | 9.63e-05 | 0.000772 | 4.24e-06 | 0.000136% |
| L1344     | False | ZB2      | 2.52e-06 | 0.00023%  | 0.0 | 1 | 0.000563 | 0.000352 | 2.52e-05 | 1.1e-05  | 0.000353% |
| OTU_5531  | True  | OD1      | 2.52e-06 | 0.00023%  | 0.0 | 1 | 0.000316 | 1.3e-06  | 0.0      | 4.51e-06 | 0.000145% |
| L674      | False | koll11   | 2.51e-06 | 0.000228% | 0.0 | 1 | 0.00786  | 0.00161  | 0.0024   | 4.75e-06 | 0.000152% |
| L944      | False | koll11   | 2.5e-06  | 0.000227% | 0.0 | 1 | 0.0046   | 0.000492 | 0.00106  | 2.4e-06  | 7.68e-05% |
| L1185     | False | GIF10    | 2.49e-06 | 0.000227% | 0.0 | 1 | 0.00114  | 0.000183 | 7.01e-05 | 4.14e-06 | 0.000133% |
| OTU_307   | True  | koll11   | 2.49e-06 | 0.000227% | 0.0 | 1 | 0.00397  | 0.000227 | 0.00108  | 4.83e-06 | 0.000155% |
| OTU_2626  | True  | SJA-4    | 2.49e-06 | 0.000227% | 0.0 | 1 | 3.49e-05 | 4.42e-07 | 0.000581 | 7.39e-06 | 0.000237% |
| L1648     | False | ZB2      | 2.49e-06 | 0.000227% | 0.0 | 1 | 0.000438 | 0.000194 | 1.08e-05 | 6.9e-06  | 0.000221% |
| OTU_5528  | True  | ZB2      | 2.49e-06 | 0.000227% | 0.0 | 1 | 0.000198 | 5.2e-05  | 8.5e-06  | 7.48e-06 | 0.00024%  |
| OTU_418   | True  | koll11   | 2.48e-06 | 0.000226% | 0.0 | 1 | 0.00122  | 3.74e-05 | 5.05e-06 | 3.08e-06 | 9.86e-05% |
| OTU_4887  | True  | koll11   | 2.47e-06 | 0.000225% | 0.0 | 1 | 0.000475 | 4.71e-06 | 4.3e-05  | 4.76e-06 | 0.000153% |
| OTU_7966  | True  | ZB2      | 2.47e-06 | 0.000225% | 0.0 | 1 | 0.0      | 0.000328 | 8.13e-05 | 8.4e-06  | 0.000269% |
| OTU_9808  | True  | TM7-1    | 2.47e-06 | 0.000225% | 0.0 | 1 | 0.000284 | 0.0      | 0.0      | 5.06e-06 | 0.000162% |
| L245      | False | ABY1     | 2.46e-06 | 0.000224% | 0.0 | 1 | 0.000104 | 2.69e-05 | 0.00103  | 8.22e-06 | 0.000263% |
| L1168     | False | GIF10    | 2.46e-06 | 0.000224% | 0.0 | 1 | 0.00123  | 0.00025  | 4.74e-05 | 4.74e-06 | 0.000152% |
| L1469     | False | ZB2      | 2.46e-06 | 0.000224% | 0.0 | 1 | 0.000473 | 1.12e-05 | 1.58e-05 | 3.28e-06 | 0.000105% |
| OTU_7974  | True  | ABY1     | 2.45e-06 | 0.000223% | 0.0 | 1 | 0.000122 | 0.00018  | 7.06e-06 | 1.23e-05 | 0.000395% |
| L684      | False | koll11   | 2.44e-06 | 0.000222% | 0.0 | 1 | 0.000979 | 3.69e-05 | 3.08e-05 | 5.59e-06 | 0.000179% |
| OTU_6672  | True  | ABY1     | 2.44e-06 | 0.000222% | 0.0 | 1 | 7.07e-05 | 0.000626 | 0.000225 | 1.51e-05 | 0.000483% |
| OTU_278   | True  | koll11   | 2.43e-06 | 0.000222% | 0.0 | 1 | 0.000842 | 8.81e-05 | 0.00011  | 6.96e-06 | 0.000223% |
| OTU_414   | True  | PRR-12   | 2.42e-06 | 0.000221% | 0.0 | 1 | 0.0012   | 3.67e-06 | 0.0      | 3.81e-06 | 0.000122% |
| OTU_998   | True  | PBS-25   | 2.42e-06 | 0.000221% | 0.0 | 1 | 0.00043  | 0.0      | 0.0      | 5.06e-06 | 0.000162% |
| OTU_8222  | True  | ABY1     | 2.42e-06 | 0.000221% | 0.0 | 1 | 0.000104 | 0.0      | 7.42e-08 | 4.43e-06 | 0.000142% |
| L1087     | False | koll11   | 2.41e-06 | 0.00022%  | 0.0 | 1 | 0.000667 | 0.000182 | 8.69e-05 | 9.19e-06 | 0.000294% |
| L1067     | False | koll11   | 2.41e-06 | 0.000219% | 0.0 | 1 | 0.000746 | 4.81e-05 | 0.000196 | 7.53e-06 | 0.000241% |
| OTU_8932  | True  | Mb-NB09  | 2.4e-06  | 0.000219% | 0.0 | 1 | 0.000518 | 0.000129 | 2.82e-05 | 7.42e-06 | 0.000238% |
| OTU_8198  | True  | OD1      | 2.38e-06 | 0.000217% | 0.0 | 1 | 0.000157 | 2.61e-05 | 3.39e-06 | 8.09e-06 | 0.000259% |
| OTU_8201  | True  | ABY1     | 2.38e-06 | 0.000217% | 0.0 | 1 | 0.000146 | 1.19e-05 | 7.42e-08 | 4.63e-06 | 0.000148% |
| OTU_5423  | True  | OD1      | 2.38e-06 | 0.000217% | 0.0 | 1 | 9.16e-05 | 0.0      | 0.0      | 4.86e-06 | 0.000156% |
| OTU_8267  | True  | ABY1     | 2.37e-06 | 0.000216% | 0.0 | 1 | 8.85e-06 | 0.00301  | 0.00266  | 5.31e-06 | 0.00017%  |
| OTU_2571  | True  | PBS-25   | 2.35e-06 | 0.000214% | 0.0 | 1 | 0.000248 | 1.53e-05 | 5.22e-06 | 6.05e-06 | 0.000194% |
| L747      | False | PBS-25   | 2.35e-06 | 0.000214% | 0.0 | 1 | 0.00584  | 0.000656 | 0.00107  | 3.07e-06 | 9.84e-05% |
| L387      | False | Bacteria | 2.35e-06 | 0.000214% | 0.0 | 1 | 0.835    | 0.844    | 0.902    | 2.3e-05  | 0.000737% |
| OTU_8928  | True  | TM7-1    | 2.34e-06 | 0.000213% | 0.0 | 1 | 0.000344 | 8.86e-05 | 2.3e-05  | 9.68e-06 | 0.00031%  |
| OTU_6953  | True  | ZB2      | 2.32e-06 | 0.000212% | 0.0 | 1 | 0.0      | 0.000421 | 0.0      | 2.86e-06 | 9.16e-05% |
| OTU_1094  | True  | PBS-25   | 2.32e-06 | 0.000211% | 0.0 | 1 | 0.00135  | 0.000149 | 7.05e-05 | 4.92e-06 | 0.000158% |
| L1070     | False | koll11   | 2.31e-06 | 0.000211% | 0.0 | 1 | 0.000782 | 7.12e-06 | 3.8e-06  | 5.53e-06 | 0.000177% |
| OTU_5997  | True  | OD1      | 2.3e-06  | 0.00021%  | 0.0 | 1 | 6.28e-05 | 3.91e-06 | 0.000159 | 1.29e-05 | 0.000414% |
| L1434     | False | ZB2      | 2.3e-06  | 0.000209% | 0.0 | 1 | 0.00231  | 0.000376 | 0.000299 | 4.87e-06 | 0.000156% |
| L1303     | False | TM7      | 2.3e-06  | 0.000209% | 0.0 | 1 | 0.000786 | 0.000142 | 0.000177 | 1.03e-05 | 0.00033%  |
| OTU_10765 | True  | OP11-4   | 2.3e-06  | 0.000209% | 0.0 | 1 | 0.000692 | 4.89e-05 | 7.7e-05  | 3.03e-06 | 9.72e-05% |
| L1118     | False | koll11   | 2.29e-06 | 0.000209% | 0.0 | 1 | 0.00405  | 0.000227 | 0.00108  | 4.28e-06 | 0.000137% |
| OTU_306   | True  | koll11   | 2.29e-06 | 0.000209% | 0.0 | 1 | 0.00108  | 7.42e-05 | 0.000283 | 5.61e-06 | 0.00018%  |
| L1481     | False | ZB2      | 2.29e-06 | 0.000209% | 0.0 | 1 | 0.000474 | 0.0      | 0.0      | 4.19e-06 | 0.000134% |
| L462      | False | OP11-4   | 2.28e-06 | 0.000208% | 0.0 | 1 | 0.000745 | 0.000116 | 0.000108 | 5.72e-06 | 0.000183% |
| OTU_259   | True  | PBS-25   | 2.28e-06 | 0.000208% | 0.0 | 1 | 0.00247  | 0.000692 | 0.000949 | 8.31e-06 | 0.000266% |

|           |       |         |          |           |     |   |          |          |          |          |           |
|-----------|-------|---------|----------|-----------|-----|---|----------|----------|----------|----------|-----------|
| OTU_178   | True  | koll11  | 2.27e-06 | 0.000207% | 0.0 | 1 | 0.00119  | 0.000209 | 0.000291 | 9.68e-06 | 0.00031%  |
| OTU_3998  | True  | koll11  | 2.27e-06 | 0.000207% | 0.0 | 1 | 0.000251 | 2.29e-05 | 5.03e-05 | 6.89e-06 | 0.000221% |
| OTU_5951  | True  | OD1     | 2.27e-06 | 0.000207% | 0.0 | 1 | 0.000166 | 1.82e-05 | 6.98e-06 | 6.3e-06  | 0.000202% |
| OTU_1825  | True  | koll11  | 2.26e-06 | 0.000206% | 0.0 | 1 | 0.000754 | 0.000147 | 0.000352 | 1.31e-05 | 0.00042%  |
| L340      | False | OD1     | 2.26e-06 | 0.000206% | 0.0 | 1 | 0.000521 | 2.42e-05 | 5.77e-06 | 5.21e-06 | 0.000167% |
| L351      | False | OD1     | 2.25e-06 | 0.000205% | 0.0 | 1 | 0.000584 | 0.000113 | 1.61e-05 | 5.05e-06 | 0.000162% |
| OTU_7219  | True  | ZB2     | 2.24e-06 | 0.000204% | 0.0 | 1 | 3.85e-05 | 0.000342 | 0.0      | 6.72e-06 | 0.000215% |
| OTU_858   | True  | koll11  | 2.24e-06 | 0.000204% | 0.0 | 1 | 0.000395 | 2.67e-05 | 0.0      | 7.91e-06 | 0.000253% |
| OTU_4008  | True  | koll11  | 2.24e-06 | 0.000204% | 0.0 | 1 | 0.00288  | 0.000273 | 0.000972 | 6.16e-06 | 0.000197% |
| OTU_8749  | True  | OD1     | 2.23e-06 | 0.000203% | 0.0 | 1 | 0.000432 | 0.000102 | 4.54e-05 | 6.52e-06 | 0.000209% |
| L1487     | False | ZB2     | 2.22e-06 | 0.000202% | 0.0 | 1 | 0.00219  | 0.000311 | 0.000605 | 6.91e-06 | 0.000221% |
| L1394     | False | ZB2     | 2.22e-06 | 0.000202% | 0.0 | 1 | 0.00453  | 0.00316  | 0.00218  | 3.07e-05 | 0.000983% |
| L761      | False | PBS-25  | 2.22e-06 | 0.000202% | 0.0 | 1 | 0.00248  | 0.000107 | 0.000147 | 6.76e-06 | 0.000217% |
| L609      | False | PRR-12  | 2.21e-06 | 0.000201% | 0.0 | 1 | 0.000797 | 0.0      | 0.0      | 3.05e-06 | 9.75e-05% |
| OTU_811   | True  | koll11  | 2.21e-06 | 0.000201% | 0.0 | 1 | 0.000402 | 0.0      | 1.42e-05 | 3.2e-06  | 0.000103% |
| L1570     | False | ZB2     | 2.21e-06 | 0.000201% | 0.0 | 1 | 0.00196  | 0.000256 | 0.000611 | 4.94e-06 | 0.000158% |
| L373      | False | ABY1    | 2.2e-06  | 0.000201% | 0.0 | 1 | 0.000501 | 0.000287 | 2.15e-05 | 8.93e-06 | 0.000286% |
| L1492     | False | ZB2     | 2.2e-06  | 0.0002%   | 0.0 | 1 | 0.000839 | 0.000154 | 2.15e-05 | 3.02e-06 | 9.68e-05% |
| L915      | False | OP3     | 2.2e-06  | 0.0002%   | 0.0 | 1 | 0.00116  | 8.72e-05 | 4.95e-06 | 2.83e-06 | 9.06e-05% |
| OTU_891   | True  | PRR-12  | 2.19e-06 | 0.0002%   | 0.0 | 1 | 0.00117  | 0.000147 | 7.07e-05 | 6.03e-06 | 0.000193% |
| OTU_345   | True  | koll11  | 2.18e-06 | 0.000199% | 0.0 | 1 | 3.65e-05 | 6.01e-05 | 0.000456 | 1.3e-05  | 0.000417% |
| L1502     | False | ZB2     | 2.18e-06 | 0.000198% | 0.0 | 1 | 0.000213 | 3.82e-05 | 4.16e-05 | 1.48e-05 | 0.000475% |
| L1172     | False | GIF10   | 2.17e-06 | 0.000197% | 0.0 | 1 | 0.00107  | 0.00025  | 4.74e-05 | 4.82e-06 | 0.000155% |
| OTU_6161  | True  | ABY1    | 2.16e-06 | 0.000197% | 0.0 | 1 | 0.000145 | 0.0      | 0.0      | 4.66e-06 | 0.000149% |
| L237      | False | ABY1    | 2.16e-06 | 0.000196% | 0.0 | 1 | 0.0015   | 3.57e-05 | 3.19e-05 | 3.1e-06  | 9.92e-05% |
| OTU_2529  | True  | GIF10   | 2.15e-06 | 0.000196% | 0.0 | 1 | 0.000506 | 1.54e-05 | 1.41e-05 | 4.59e-06 | 0.000147% |
| OTU_6108  | True  | ZB2     | 2.14e-06 | 0.000195% | 0.0 | 1 | 0.0      | 0.000137 | 2.25e-06 | 4.49e-06 | 0.000144% |
| OTU_10850 | True  | OP11-4  | 2.14e-06 | 0.000195% | 0.0 | 1 | 0.000113 | 0.0      | 0.0      | 3.88e-06 | 0.000124% |
| OTU_5514  | True  | OD1     | 2.13e-06 | 0.000194% | 0.0 | 1 | 0.000136 | 1.87e-05 | 0.0      | 5.86e-06 | 0.000188% |
| OTU_7207  | True  | ZB2     | 2.13e-06 | 0.000194% | 0.0 | 1 | 9.83e-05 | 2.2e-06  | 2.14e-06 | 4.66e-06 | 0.000149% |
| OTU_904   | True  | koll11  | 2.13e-06 | 0.000194% | 0.0 | 1 | 0.000433 | 1.01e-05 | 0.0      | 3.5e-06  | 0.000112% |
| OTU_549   | True  | koll11  | 2.13e-06 | 0.000194% | 0.0 | 1 | 0.00023  | 0.0      | 2.72e-05 | 5.2e-06  | 0.000167% |
| L280      | False | ABY1    | 2.12e-06 | 0.000193% | 0.0 | 1 | 0.000395 | 2.57e-05 | 0.0      | 4.13e-06 | 0.000132% |
| OTU_2412  | True  | SJA-4   | 2.11e-06 | 0.000192% | 0.0 | 1 | 0.000167 | 8.8e-06  | 0.0      | 5.1e-06  | 0.000163% |
| L1707     | False | Mb-NB09 | 2.11e-06 | 0.000192% | 0.0 | 1 | 0.000989 | 8.87e-05 | 4.57e-05 | 3.4e-06  | 0.000109% |
| OTU_7938  | True  | ABY1    | 2.1e-06  | 0.000191% | 0.0 | 1 | 0.00028  | 2.25e-06 | 2.87e-05 | 4.49e-06 | 0.000144% |
| OTU_10809 | True  | OP11-4  | 2.1e-06  | 0.000191% | 0.0 | 1 | 0.000289 | 4.86e-05 | 0.0      | 4.38e-06 | 0.00014%  |
| OTU_8239  | True  | ABY1    | 2.09e-06 | 0.000191% | 0.0 | 1 | 0.000228 | 1.66e-06 | 0.0      | 4.13e-06 | 0.000132% |
| OTU_6680  | True  | OD1     | 2.09e-06 | 0.000191% | 0.0 | 1 | 0.000257 | 0.0      | 1.65e-05 | 3.26e-06 | 0.000104% |
| OTU_8990  | True  | ABY1    | 2.08e-06 | 0.000189% | 0.0 | 1 | 0.0      | 0.000338 | 0.000168 | 9.2e-06  | 0.000295% |
| L1170     | False | GIF10   | 2.08e-06 | 0.000189% | 0.0 | 1 | 0.00107  | 0.00025  | 4.74e-05 | 4.62e-06 | 0.000148% |
| L34       | False | ABY1    | 2.08e-06 | 0.000189% | 0.0 | 1 | 0.000413 | 1.93e-05 | 1.91e-05 | 3.57e-06 | 0.000114% |
| L445      | False | OP11-4  | 2.07e-06 | 0.000189% | 0.0 | 1 | 0.00139  | 7.45e-05 | 0.000909 | 9.12e-06 | 0.000292% |
| OTU_6976  | True  | ZB2     | 2.07e-06 | 0.000189% | 0.0 | 1 | 0.000301 | 2.76e-05 | 2.43e-05 | 7.87e-06 | 0.000252% |
| OTU_892   | True  | BD4-9   | 2.07e-06 | 0.000188% | 0.0 | 1 | 0.000293 | 0.0      | 0.0      | 5.11e-06 | 0.000164% |
| OTU_7929  | True  | OD1     | 2.06e-06 | 0.000188% | 0.0 | 1 | 9.59e-05 | 0.0      | 8.29e-07 | 4.34e-06 | 0.000139% |
| L1880     | False | OD1     | 2.05e-06 | 0.000187% | 0.0 | 1 | 0.00031  | 4.8e-05  | 1.68e-05 | 5.04e-06 | 0.000161% |
| OTU_4010  | True  | koll11  | 2.03e-06 | 0.000185% | 0.0 | 1 | 0.000545 | 0.000255 | 7.35e-06 | 6.65e-06 | 0.000213% |
| L1291     | False | TM7-3   | 2.02e-06 | 0.000184% | 0.0 | 1 | 0.00162  | 5.22e-07 | 3.05e-05 | 3.15e-06 | 0.000101% |
| L1620     | False | ZB2     | 2.01e-06 | 0.000183% | 0.0 | 1 | 0.00199  | 0.00149  | 0.000866 | 2.87e-05 | 0.000919% |
| OTU_821   | True  | koll11  | 2.01e-06 | 0.000183% | 0.0 | 1 | 0.000186 | 0.0      | 0.0      | 4.29e-06 | 0.000137% |
| OTU_817   | True  | BD4-9   | 2.01e-06 | 0.000183% | 0.0 | 1 | 0.000119 | 0.0      | 0.0      | 3.66e-06 | 0.000117% |
| OTU_8021  | True  | ABY1    | 1.99e-06 | 0.000181% | 0.0 | 1 | 0.000637 | 3.35e-05 | 3.19e-06 | 4.38e-06 | 0.00014%  |
| L1651     | False | ZB2     | 1.99e-06 | 0.000181% | 0.0 | 1 | 0.000178 | 8.52e-05 | 0.000818 | 1.02e-05 | 0.000328% |
| L720      | False | PBS-25  | 1.97e-06 | 0.000179% | 0.0 | 1 | 0.00217  | 0.000314 | 0.000626 | 5.44e-06 | 0.000174% |
| OTU_1539  | True  | PBS-25  | 1.97e-06 | 0.000179% | 0.0 | 1 | 0.000141 | 0.0      | 0.0      | 4.19e-06 | 0.000134% |
| L906      | False | koll11  | 1.96e-06 | 0.000179% | 0.0 | 1 | 0.00115  | 0.00025  | 0.00105  | 1.65e-05 | 0.000528% |
| OTU_8006  | True  | TM7-1   | 1.96e-06 | 0.000178% | 0.0 | 1 | 0.00036  | 4.44e-05 | 0.0      | 5.24e-06 | 0.000168% |
| OTU_559   | True  | koll11  | 1.95e-06 | 0.000178% | 0.0 | 1 | 0.000339 | 1.61e-05 | 3.45e-05 | 4.93e-06 | 0.000158% |
| OTU_6189  | True  | ZB2     | 1.95e-06 | 0.000178% | 0.0 | 1 | 0.0      | 0.000409 | 8.73e-05 | 3.16e-06 | 0.000101% |
| OTU_6069  | True  | ABY1    | 1.95e-06 | 0.000178% | 0.0 | 1 | 0.000321 | 4.16e-05 | 3.57e-05 | 6.11e-06 | 0.000196% |
| L1266     | False | TM7-1   | 1.94e-06 | 0.000177% | 0.0 | 1 | 0.00136  | 0.000263 | 7.09e-05 | 4.19e-06 | 0.000134% |
| OTU_262   | True  | koll11  | 1.94e-06 | 0.000177% | 0.0 | 1 | 0.00749  | 0.00107  | 0.00214  | 5.15e-06 | 0.000165% |
| OTU_8012  | True  | ZB2     | 1.93e-06 | 0.000176% | 0.0 | 1 | 0.000759 | 1.77e-05 | 0.000199 | 5.7e-06  | 0.000183% |
| L1877     | False | OD1     | 1.93e-06 | 0.000176% | 0.0 | 1 | 0.000755 | 0.000188 | 4.05e-05 | 4.78e-06 | 0.000153% |

|           |       |         |          |           |     |   |          |          |          |          |           |
|-----------|-------|---------|----------|-----------|-----|---|----------|----------|----------|----------|-----------|
| OTU_8050  | True  | ABY1    | 1.92e-06 | 0.000175% | 0.0 | 1 | 0.000161 | 4.45e-05 | 1.81e-07 | 6e-06    | 0.000192% |
| OTU_6569  | True  | ZB2     | 1.92e-06 | 0.000175% | 0.0 | 1 | 0.000332 | 3.01e-05 | 1.64e-05 | 4.48e-06 | 0.000144% |
| OTU_466   | True  | koll11  | 1.92e-06 | 0.000175% | 0.0 | 1 | 0.000202 | 6.78e-06 | 0.000104 | 1.05e-05 | 0.000335% |
| L665      | False | koll11  | 1.91e-06 | 0.000174% | 0.0 | 1 | 0.00305  | 8.14e-05 | 0.000354 | 2.93e-06 | 9.37e-05% |
| OTU_8936  | True  | Mb-NB09 | 1.9e-06  | 0.000173% | 0.0 | 1 | 0.0      | 0.0002   | 1.24e-05 | 4.84e-06 | 0.000155% |
| L214      | False | ABY1    | 1.89e-06 | 0.000172% | 0.0 | 1 | 0.000256 | 3.17e-05 | 0.0      | 4.75e-06 | 0.000152% |
| L696      | False | koll11  | 1.89e-06 | 0.000172% | 0.0 | 1 | 0.00193  | 0.000563 | 5.65e-05 | 2.71e-06 | 8.67e-05% |
| OTU_8219  | True  | ABY1    | 1.88e-06 | 0.000171% | 0.0 | 1 | 0.000137 | 9.47e-06 | 1.3e-05  | 6.71e-06 | 0.000215% |
| OTU_8247  | True  | ZB2     | 1.87e-06 | 0.000171% | 0.0 | 1 | 0.000413 | 1.14e-05 | 2.97e-06 | 3.4e-06  | 0.000109% |
| OTU_2577  | True  | PBS-25  | 1.87e-06 | 0.000171% | 0.0 | 1 | 0.000835 | 9.94e-05 | 3.42e-05 | 5.33e-06 | 0.000171% |
| OTU_293   | True  | koll11  | 1.87e-06 | 0.00017%  | 0.0 | 1 | 0.000462 | 0.000214 | 0.000124 | 2.2e-05  | 0.000706% |
| OTU_10770 | True  | OP11-4  | 1.86e-06 | 0.00017%  | 0.0 | 1 | 0.000246 | 8.77e-05 | 3.05e-06 | 5.39e-06 | 0.000173% |
| OTU_3769  | True  | koll11  | 1.86e-06 | 0.00017%  | 0.0 | 1 | 0.00138  | 0.000307 | 4.91e-05 | 3.5e-06  | 0.000112% |
| OTU_509   | True  | PBS-25  | 1.86e-06 | 0.000169% | 0.0 | 1 | 0.00114  | 9.98e-05 | 5.34e-05 | 5.05e-06 | 0.000162% |
| L1875     | False | OD1     | 1.86e-06 | 0.000169% | 0.0 | 1 | 0.000954 | 0.000336 | 5.06e-05 | 5.42e-06 | 0.000174% |
| L451      | False | OP11-4  | 1.85e-06 | 0.000168% | 0.0 | 1 | 0.00117  | 5.38e-05 | 0.000775 | 9.64e-06 | 0.000309% |
| OTU_8227  | True  | OD1     | 1.85e-06 | 0.000168% | 0.0 | 1 | 0.000118 | 7.22e-06 | 1.53e-05 | 5.66e-06 | 0.000181% |
| OTU_8164  | True  | Mb-NB09 | 1.85e-06 | 0.000168% | 0.0 | 1 | 0.000668 | 0.000413 | 6.22e-05 | 8.14e-06 | 0.000261% |
| OTU_9341  | True  | TM7-1   | 1.84e-06 | 0.000168% | 0.0 | 1 | 0.000224 | 3.22e-06 | 3.68e-05 | 4.77e-06 | 0.000153% |
| L65       | False | ABY1    | 1.84e-06 | 0.000168% | 0.0 | 1 | 0.00048  | 1.02e-06 | 0.00011  | 5.93e-06 | 0.00019%  |
| OTU_2714  | True  | koll11  | 1.84e-06 | 0.000168% | 0.0 | 1 | 0.00119  | 0.000244 | 0.000824 | 1.37e-05 | 0.000438% |
| L739      | False | PBS-25  | 1.84e-06 | 0.000167% | 0.0 | 1 | 0.00251  | 0.000195 | 0.00124  | 8.43e-06 | 0.00027%  |
| OTU_2279  | True  | OP3     | 1.83e-06 | 0.000167% | 0.0 | 1 | 0.00125  | 4e-05    | 0.0      | 2.44e-06 | 7.8e-05%  |
| OTU_3356  | True  | SBRH58  | 1.82e-06 | 0.000166% | 0.0 | 1 | 0.000349 | 0.0      | 7.42e-08 | 2.98e-06 | 9.56e-05% |
| L728      | False | PBS-25  | 1.82e-06 | 0.000166% | 0.0 | 1 | 0.00842  | 0.000857 | 0.000909 | 2.66e-06 | 8.53e-05% |
| OTU_6219  | True  | ZB2     | 1.82e-06 | 0.000166% | 0.0 | 1 | 0.000296 | 2.4e-05  | 0.0      | 4.96e-06 | 0.000159% |
| OTU_190   | True  | koll11  | 1.82e-06 | 0.000165% | 0.0 | 1 | 0.00252  | 0.000588 | 0.00208  | 1.57e-05 | 0.000503% |
| L1734     | False | Mb-NB09 | 1.81e-06 | 0.000165% | 0.0 | 1 | 0.000909 | 0.000413 | 6.22e-05 | 5.21e-06 | 0.000167% |
| OTU_2202  | True  | PBS-25  | 1.8e-06  | 0.000164% | 0.0 | 1 | 0.000221 | 0.0      | 0.0      | 4.36e-06 | 0.00014%  |
| OTU_367   | True  | koll11  | 1.79e-06 | 0.000163% | 0.0 | 1 | 0.000515 | 4.81e-05 | 0.00019  | 7e-06    | 0.000224% |
| OTU_860   | True  | PBS-25  | 1.79e-06 | 0.000163% | 0.0 | 1 | 0.000217 | 0.0      | 0.0      | 5.24e-06 | 0.000168% |
| OTU_1432  | True  | koll11  | 1.79e-06 | 0.000163% | 0.0 | 1 | 0.000482 | 5.14e-06 | 0.0      | 1.98e-06 | 6.36e-05% |
| L1086     | False | koll11  | 1.79e-06 | 0.000163% | 0.0 | 1 | 0.00318  | 0.000635 | 0.000361 | 3.23e-06 | 0.000104% |
| OTU_445   | True  | koll11  | 1.78e-06 | 0.000163% | 0.0 | 1 | 0.000435 | 9.09e-05 | 7.13e-05 | 6.67e-06 | 0.000214% |
| OTU_985   | True  | PBS-25  | 1.77e-06 | 0.000162% | 0.0 | 1 | 0.000518 | 3.65e-05 | 7.42e-08 | 3.26e-06 | 0.000104% |
| L382      | False | OD1     | 1.76e-06 | 0.000161% | 0.0 | 1 | 0.000897 | 4.5e-05  | 5.3e-06  | 2.86e-06 | 9.17e-05% |
| L1127     | False | koll11  | 1.76e-06 | 0.00016%  | 0.0 | 1 | 0.000769 | 0.000104 | 3.61e-05 | 6.36e-06 | 0.000204% |
| OTU_554   | True  | PRR-12  | 1.76e-06 | 0.00016%  | 0.0 | 1 | 0.000444 | 0.0      | 0.0      | 3.49e-06 | 0.000112% |
| OTU_574   | True  | koll11  | 1.75e-06 | 0.00016%  | 0.0 | 1 | 0.000253 | 1.71e-06 | 3.84e-05 | 4.82e-06 | 0.000155% |
| OTU_9374  | True  | TM7-1   | 1.75e-06 | 0.00016%  | 0.0 | 1 | 0.000291 | 0.0      | 0.0      | 3.35e-06 | 0.000107% |
| L688      | False | koll11  | 1.75e-06 | 0.000159% | 0.0 | 1 | 0.00486  | 0.00118  | 0.00146  | 3.65e-06 | 0.000117% |
| L1899     | False | OD1     | 1.74e-06 | 0.000159% | 0.0 | 1 | 0.000877 | 0.000218 | 0.000113 | 6.11e-06 | 0.000196% |
| L1759     | False | OD1     | 1.73e-06 | 0.000158% | 0.0 | 1 | 0.000317 | 0.0      | 0.000272 | 8.04e-06 | 0.000258% |
| OTU_2194  | True  | koll11  | 1.73e-06 | 0.000158% | 0.0 | 1 | 0.000873 | 1.32e-05 | 0.00103  | 7.38e-06 | 0.000236% |
| OTU_6222  | True  | ZB2     | 1.73e-06 | 0.000157% | 0.0 | 1 | 0.000243 | 3.29e-05 | 5.48e-05 | 6.55e-06 | 0.00021%  |
| L1283     | False | TM7-3   | 1.71e-06 | 0.000156% | 0.0 | 1 | 0.000419 | 0.0      | 0.0      | 3.6e-06  | 0.000115% |
| L1508     | False | OD1     | 1.7e-06  | 0.000155% | 0.0 | 1 | 0.0136   | 0.00262  | 0.00749  | 2.93e-06 | 9.4e-05%  |
| L1203     | False | koll11  | 1.69e-06 | 0.000154% | 0.0 | 1 | 0.000537 | 5.12e-05 | 9.29e-05 | 4.84e-06 | 0.000155% |
| L615      | False | BD4-9   | 1.68e-06 | 0.000153% | 0.0 | 1 | 0.000412 | 1.39e-05 | 0.0      | 3.46e-06 | 0.000111% |
| OTU_2009  | True  | PRR-12  | 1.66e-06 | 0.000152% | 0.0 | 1 | 0.00137  | 0.000146 | 0.000214 | 3.34e-06 | 0.000107% |
| OTU_7949  | True  | ABY1    | 1.66e-06 | 0.000151% | 0.0 | 1 | 0.000762 | 0.000104 | 6.04e-06 | 2.78e-06 | 8.9e-05%  |
| L225      | False | ABY1    | 1.65e-06 | 0.00015%  | 0.0 | 1 | 0.00122  | 0.00091  | 0.000582 | 4.63e-05 | 0.00148%  |
| OTU_5075  | True  | GIF10   | 1.64e-06 | 0.00015%  | 0.0 | 1 | 0.000121 | 0.0      | 0.0      | 2.66e-06 | 8.51e-05% |
| OTU_8213  | True  | ABY1    | 1.64e-06 | 0.000149% | 0.0 | 1 | 0.000142 | 9.42e-07 | 0.0      | 2.5e-06  | 8.01e-05% |
| OTU_981   | True  | PRR-12  | 1.63e-06 | 0.000149% | 0.0 | 1 | 0.000759 | 9.62e-07 | 0.0      | 3.39e-06 | 0.000109% |
| L152      | False | ABY1    | 1.62e-06 | 0.000148% | 0.0 | 1 | 0.000476 | 0.000296 | 3.96e-05 | 9.84e-06 | 0.000315% |
| L997      | False | koll11  | 1.62e-06 | 0.000147% | 0.0 | 1 | 0.000943 | 0.000147 | 0.000369 | 6.11e-06 | 0.000196% |
| OTU_7211  | True  | ABY1    | 1.62e-06 | 0.000147% | 0.0 | 1 | 8.18e-05 | 0.0      | 0.0      | 3.92e-06 | 0.000125% |
| OTU_6184  | True  | SM2F11  | 1.61e-06 | 0.000147% | 0.0 | 1 | 0.0      | 0.000213 | 1.5e-05  | 3.95e-06 | 0.000127% |
| OTU_363   | True  | koll11  | 1.61e-06 | 0.000146% | 0.0 | 1 | 0.00037  | 4.42e-07 | 0.0      | 2.48e-06 | 7.94e-05% |
| OTU_498   | True  | wb1_H11 | 1.59e-06 | 0.000145% | 0.0 | 1 | 0.000353 | 0.0      | 0.0      | 2.95e-06 | 9.46e-05% |
| OTU_2685  | True  | PBS-25  | 1.59e-06 | 0.000145% | 0.0 | 1 | 0.0      | 0.0      | 0.000366 | 3.76e-06 | 0.00012%  |
| OTU_5837  | True  | OD1     | 1.59e-06 | 0.000144% | 0.0 | 1 | 0.000179 | 7.57e-06 | 4.63e-05 | 6.42e-06 | 0.000206% |
| OTU_9815  | True  | ABY1    | 1.58e-06 | 0.000144% | 0.0 | 1 | 0.000118 | 0.0      | 0.0      | 3.18e-06 | 0.000102% |

|           |       |        |          |           |     |   |          |          |          |          |           |
|-----------|-------|--------|----------|-----------|-----|---|----------|----------|----------|----------|-----------|
| OTU_1232  | True  | PBS-25 | 1.58e-06 | 0.000144% | 0.0 | 1 | 0.00215  | 8.59e-05 | 9.04e-05 | 3.67e-06 | 0.000117% |
| OTU_6708  | True  | ZB2    | 1.57e-06 | 0.000143% | 0.0 | 1 | 0.000106 | 0.0      | 0.0      | 2.87e-06 | 9.18e-05% |
| OTU_8252  | True  | ABY1   | 1.57e-06 | 0.000143% | 0.0 | 1 | 0.00127  | 4.21e-05 | 5.93e-06 | 2.17e-06 | 6.95e-05% |
| OTU_454   | True  | koll11 | 1.57e-06 | 0.000143% | 0.0 | 1 | 0.000484 | 4.35e-05 | 2.69e-05 | 2.91e-06 | 9.31e-05% |
| L786      | False | PBS-25 | 1.56e-06 | 0.000142% | 0.0 | 1 | 0.000831 | 0.00011  | 0.000375 | 7.61e-06 | 0.000244% |
| OTU_295   | True  | koll11 | 1.56e-06 | 0.000142% | 0.0 | 1 | 2.32e-05 | 0.000219 | 0.0      | 5.83e-06 | 0.000187% |
| L1285     | False | TM7-3  | 1.55e-06 | 0.000141% | 0.0 | 1 | 0.000419 | 0.0      | 0.0      | 3.27e-06 | 0.000105% |
| OTU_440   | True  | PBS-25 | 1.55e-06 | 0.000141% | 0.0 | 1 | 0.000802 | 0.000101 | 3.68e-05 | 2.95e-06 | 9.44e-05% |
| OTU_6995  | True  | ABY1   | 1.55e-06 | 0.000141% | 0.0 | 1 | 0.001    | 0.000326 | 9.49e-05 | 3.69e-06 | 0.000118% |
| L546      | False | SJA-4  | 1.54e-06 | 0.00014%  | 0.0 | 1 | 0.00044  | 0.00023  | 0.00101  | 2.06e-05 | 0.000661% |
| OTU_7958  | True  | ABY1   | 1.53e-06 | 0.000139% | 0.0 | 1 | 0.000116 | 9.53e-06 | 0.0      | 4e-06    | 0.000128% |
| L414      | False | ABY1   | 1.52e-06 | 0.000138% | 0.0 | 1 | 5.72e-06 | 0.000569 | 0.00196  | 4.66e-06 | 0.000149% |
| OTU_7943  | True  | ABY1   | 1.52e-06 | 0.000138% | 0.0 | 1 | 0.0001   | 0.0      | 0.0      | 3.56e-06 | 0.000114% |
| OTU_501   | True  | koll11 | 1.52e-06 | 0.000138% | 0.0 | 1 | 0.000244 | 0.0      | 0.0      | 2.16e-06 | 6.92e-05% |
| OTU_8865  | True  | TM7-1  | 1.51e-06 | 0.000138% | 0.0 | 1 | 0.0      | 5.31e-05 | 0.000297 | 5.28e-06 | 0.000169% |
| OTU_659   | True  | koll11 | 1.5e-06  | 0.000137% | 0.0 | 1 | 0.000144 | 0.0      | 0.0      | 2.75e-06 | 8.81e-05% |
| OTU_3274  | True  | PBS-25 | 1.49e-06 | 0.000136% | 0.0 | 1 | 0.000322 | 2.36e-05 | 0.0      | 3.17e-06 | 0.000102% |
| L48       | False | OD1    | 1.49e-06 | 0.000136% | 0.0 | 1 | 0.000493 | 0.000405 | 5.86e-06 | 7.44e-06 | 0.000238% |
| OTU_893   | True  | PBS-25 | 1.49e-06 | 0.000136% | 0.0 | 1 | 0.000582 | 6.58e-05 | 7.42e-08 | 3.47e-06 | 0.000111% |
| OTU_6633  | True  | ZB2    | 1.47e-06 | 0.000134% | 0.0 | 1 | 0.000164 | 4.94e-06 | 8.03e-05 | 5.64e-06 | 0.000181% |
| L1639     | False | ZB2    | 1.47e-06 | 0.000134% | 0.0 | 1 | 0.00118  | 0.000307 | 0.00104  | 1.07e-05 | 0.000343% |
| L571      | False | SJA-4  | 1.46e-06 | 0.000133% | 0.0 | 1 | 0.000167 | 1.47e-05 | 0.0      | 3.79e-06 | 0.000122% |
| OTU_6305  | True  | OD1    | 1.46e-06 | 0.000133% | 0.0 | 1 | 6.19e-05 | 0.0      | 0.0      | 3.51e-06 | 0.000112% |
| OTU_6515  | True  | SM2F11 | 1.45e-06 | 0.000133% | 0.0 | 1 | 0.000267 | 0.0      | 3.22e-05 | 3.77e-06 | 0.000121% |
| OTU_7029  | True  | OD1    | 1.45e-06 | 0.000132% | 0.0 | 1 | 0.00022  | 0.000249 | 7.35e-05 | 2.02e-05 | 0.000648% |
| OTU_562   | True  | koll11 | 1.45e-06 | 0.000132% | 0.0 | 1 | 0.000395 | 2.78e-05 | 6.04e-05 | 3.68e-06 | 0.000118% |
| OTU_1042  | True  | OP3    | 1.44e-06 | 0.000131% | 0.0 | 1 | 0.000315 | 4.48e-05 | 5.7e-06  | 2.57e-06 | 8.24e-05% |
| OTU_5491  | True  | OD1    | 1.43e-06 | 0.00013%  | 0.0 | 1 | 0.000443 | 0.0      | 0.0      | 2.49e-06 | 7.99e-05% |
| OTU_8762  | True  | OD1    | 1.42e-06 | 0.00013%  | 0.0 | 1 | 0.000236 | 9.94e-06 | 2.71e-05 | 3.16e-06 | 0.000101% |
| OTU_8757  | True  | OD1    | 1.42e-06 | 0.000129% | 0.0 | 1 | 0.000127 | 0.0      | 8.21e-05 | 6.2e-06  | 0.000199% |
| OTU_6930  | True  | ZB2    | 1.42e-06 | 0.000129% | 0.0 | 1 | 0.000169 | 0.0      | 0.0      | 3.02e-06 | 9.66e-05% |
| OTU_7980  | True  | OP11-4 | 1.41e-06 | 0.000129% | 0.0 | 1 | 0.000145 | 2.53e-05 | 2.3e-05  | 4.96e-06 | 0.000159% |
| OTU_6005  | True  | SM2F11 | 1.41e-06 | 0.000129% | 0.0 | 1 | 0.00024  | 2.67e-05 | 3.03e-05 | 4.04e-06 | 0.00013%  |
| OTU_5377  | True  | ZB2    | 1.41e-06 | 0.000128% | 0.0 | 1 | 0.000218 | 2.16e-05 | 5.83e-05 | 7.24e-06 | 0.000232% |
| L553      | False | SJA-4  | 1.39e-06 | 0.000126% | 0.0 | 1 | 0.000694 | 6.99e-05 | 5.85e-05 | 4.74e-06 | 0.000152% |
| OTU_10934 | True  | GIF10  | 1.38e-06 | 0.000126% | 0.0 | 1 | 0.000161 | 0.0      | 0.0      | 2.56e-06 | 8.19e-05% |
| OTU_550   | True  | koll11 | 1.38e-06 | 0.000126% | 0.0 | 1 | 0.000231 | 0.0      | 5.69e-06 | 3.57e-06 | 0.000114% |
| OTU_906   | True  | koll11 | 1.38e-06 | 0.000125% | 0.0 | 1 | 0.000847 | 0.000131 | 7.56e-05 | 2.73e-06 | 8.75e-05% |
| L719      | False | PBS-25 | 1.37e-06 | 0.000125% | 0.0 | 1 | 0.00258  | 0.000418 | 0.000726 | 3.44e-06 | 0.00011%  |
| OTU_5392  | True  | ZB2    | 1.36e-06 | 0.000124% | 0.0 | 1 | 6.06e-05 | 0.0      | 6.9e-06  | 4.24e-06 | 0.000136% |
| OTU_6579  | True  | ZB2    | 1.36e-06 | 0.000124% | 0.0 | 1 | 1.85e-06 | 0.000127 | 0.000531 | 5.88e-06 | 0.000188% |
| L1749     | False | OD1    | 1.35e-06 | 0.000123% | 0.0 | 1 | 0.00114  | 0.000751 | 0.00196  | 2.25e-05 | 0.000722% |
| OTU_4122  | True  | koll11 | 1.35e-06 | 0.000123% | 0.0 | 1 | 0.000522 | 8.62e-05 | 0.000163 | 9.51e-06 | 0.000305% |
| L1359     | False | ZB2    | 1.35e-06 | 0.000123% | 0.0 | 1 | 0.000292 | 0.0      | 0.000365 | 7.09e-06 | 0.000227% |
| OTU_8373  | True  | ABY1   | 1.34e-06 | 0.000122% | 0.0 | 1 | 0.000151 | 2.25e-07 | 1.74e-05 | 3e-06    | 9.62e-05% |
| OTU_580   | True  | PBS-25 | 1.33e-06 | 0.000122% | 0.0 | 1 | 0.00146  | 0.00016  | 0.000161 | 2.79e-06 | 8.95e-05% |
| OTU_7215  | True  | ABY1   | 1.33e-06 | 0.000121% | 0.0 | 1 | 0.00059  | 0.000146 | 2.46e-05 | 3.21e-06 | 0.000103% |
| OTU_1140  | True  | PBS-25 | 1.33e-06 | 0.000121% | 0.0 | 1 | 0.000447 | 5.68e-05 | 0.000298 | 1.17e-05 | 0.000376% |
| OTU_8143  | True  | OP11-4 | 1.33e-06 | 0.000121% | 0.0 | 1 | 9.94e-06 | 1.08e-06 | 0.000109 | 4.74e-06 | 0.000152% |
| OTU_4802  | True  | GIF10  | 1.32e-06 | 0.000121% | 0.0 | 1 | 0.000227 | 3.88e-05 | 0.0      | 4.25e-06 | 0.000136% |
| OTU_1244  | True  | koll11 | 1.31e-06 | 0.000119% | 0.0 | 1 | 0.000602 | 0.000216 | 0.000218 | 1.34e-05 | 0.000428% |
| OTU_4247  | True  | koll11 | 1.31e-06 | 0.000119% | 0.0 | 1 | 0.000492 | 1.04e-05 | 3.08e-05 | 2.93e-06 | 9.39e-05% |
| OTU_6933  | True  | ZB2    | 1.31e-06 | 0.000119% | 0.0 | 1 | 0.000271 | 6.07e-05 | 0.0      | 4.03e-06 | 0.000129% |
| OTU_7930  | True  | ZB2    | 1.31e-06 | 0.000119% | 0.0 | 1 | 0.000134 | 0.0      | 0.0      | 2.62e-06 | 8.39e-05% |
| OTU_8126  | True  | ABY1   | 1.3e-06  | 0.000119% | 0.0 | 1 | 0.0009   | 1.07e-06 | 3e-05    | 3.49e-06 | 0.000112% |
| L817      | False | PBS-25 | 1.29e-06 | 0.000118% | 0.0 | 1 | 0.00131  | 0.00012  | 7.42e-08 | 2.95e-06 | 9.46e-05% |
| OTU_7041  | True  | ZB2    | 1.29e-06 | 0.000118% | 0.0 | 1 | 1.5e-06  | 0.000492 | 0.000384 | 4.2e-06  | 0.000135% |
| L693      | False | koll11 | 1.28e-06 | 0.000117% | 0.0 | 1 | 0.00162  | 0.000317 | 0.000582 | 4.83e-06 | 0.000155% |
| OTU_5887  | True  | OD1    | 1.28e-06 | 0.000116% | 0.0 | 1 | 0.000311 | 2.51e-05 | 4e-06    | 2.31e-06 | 7.39e-05% |
| OTU_966   | True  | PRR-12 | 1.28e-06 | 0.000116% | 0.0 | 1 | 0.0      | 4.5e-05  | 0.000126 | 6.97e-06 | 0.000223% |
| OTU_4833  | True  | OD1    | 1.27e-06 | 0.000116% | 0.0 | 1 | 7.5e-05  | 0.0      | 7.42e-08 | 3e-06    | 9.59e-05% |
| OTU_171   | True  | koll11 | 1.27e-06 | 0.000116% | 0.0 | 1 | 0.00128  | 0.000373 | 0.00102  | 1.1e-05  | 0.000352% |
| L683      | False | koll11 | 1.27e-06 | 0.000116% | 0.0 | 1 | 0.000979 | 3.69e-05 | 3.08e-05 | 2.9e-06  | 9.3e-05%  |
| OTU_429   | True  | PBS-25 | 1.27e-06 | 0.000116% | 0.0 | 1 | 2.91e-05 | 8.98e-06 | 0.000338 | 4.61e-06 | 0.000148% |

|           |       |         |          |           |     |   |          |          |          |          |           |
|-----------|-------|---------|----------|-----------|-----|---|----------|----------|----------|----------|-----------|
| OTU_5265  | True  | OD1     | 1.26e-06 | 0.000115% | 0.0 | 1 | 0.000644 | 7.57e-05 | 2.02e-05 | 2.46e-06 | 7.87e-05% |
| OTU_6542  | True  | OD1     | 1.26e-06 | 0.000115% | 0.0 | 1 | 0.000238 | 0.000532 | 4.47e-05 | 8.2e-06  | 0.000263% |
| OTU_1218  | True  | koll11  | 1.26e-06 | 0.000114% | 0.0 | 1 | 0.000268 | 0.000111 | 2.62e-05 | 5.57e-06 | 0.000179% |
| OTU_3804  | True  | PBS-25  | 1.25e-06 | 0.000114% | 0.0 | 1 | 0.000126 | 0.0      | 0.0      | 2.66e-06 | 8.51e-05% |
| L1104     | False | koll11  | 1.25e-06 | 0.000114% | 0.0 | 1 | 0.000863 | 7.33e-05 | 0.000402 | 5.65e-06 | 0.000181% |
| OTU_7225  | True  | ZB2     | 1.24e-06 | 0.000113% | 0.0 | 1 | 0.00288  | 0.000798 | 0.00135  | 8.45e-06 | 0.000271% |
| OTU_926   | True  | koll11  | 1.24e-06 | 0.000113% | 0.0 | 1 | 0.00103  | 0.000212 | 0.000106 | 2.64e-06 | 8.46e-05% |
| L1645     | False | ZB2     | 1.24e-06 | 0.000113% | 0.0 | 1 | 0.000827 | 0.000304 | 0.00104  | 1.32e-05 | 0.000424% |
| OTU_8009  | True  | ABY1    | 1.24e-06 | 0.000113% | 0.0 | 1 | 0.000785 | 0.0      | 0.0      | 2.59e-06 | 8.31e-05% |
| OTU_1133  | True  | GIF10   | 1.24e-06 | 0.000113% | 0.0 | 1 | 0.000562 | 0.000234 | 3.34e-05 | 5.01e-06 | 0.000161% |
| OTU_6758  | True  | ZB2     | 1.23e-06 | 0.000112% | 0.0 | 1 | 0.000213 | 9.09e-07 | 0.0      | 3.3e-06  | 0.000106% |
| L1635     | False | ZB2     | 1.23e-06 | 0.000112% | 0.0 | 1 | 0.000413 | 1.14e-05 | 2.97e-06 | 2.23e-06 | 7.13e-05% |
| L302      | False | ABY1    | 1.22e-06 | 0.000111% | 0.0 | 1 | 0.000349 | 1.37e-05 | 7e-06    | 2.28e-06 | 7.31e-05% |
| OTU_5794  | True  | OD1     | 1.22e-06 | 0.000111% | 0.0 | 1 | 0.000305 | 2.46e-05 | 3.33e-05 | 2.1e-06  | 6.73e-05% |
| OTU_6117  | True  | OD1     | 1.21e-06 | 0.00011%  | 0.0 | 1 | 0.000358 | 5.65e-05 | 0.000388 | 1.12e-05 | 0.000359% |
| L562      | False | SJA-4   | 1.21e-06 | 0.00011%  | 0.0 | 1 | 0.000289 | 0.000119 | 2.99e-07 | 3.49e-06 | 0.000112% |
| OTU_8903  | True  | ABY1    | 1.2e-06  | 0.00011%  | 0.0 | 1 | 0.00048  | 0.0      | 0.000103 | 3.78e-06 | 0.000121% |
| OTU_10776 | True  | OP11-4  | 1.2e-06  | 0.000109% | 0.0 | 1 | 5.9e-05  | 3.7e-06  | 0.0      | 2.06e-06 | 6.59e-05% |
| OTU_4482  | True  | koll11  | 1.2e-06  | 0.000109% | 0.0 | 1 | 0.000176 | 0.0      | 0.0      | 2.87e-06 | 9.18e-05% |
| L1737     | False | Mb-NB09 | 1.19e-06 | 0.000109% | 0.0 | 1 | 0.000328 | 1.43e-05 | 0.0      | 1.83e-06 | 5.85e-05% |
| L1646     | False | ZB2     | 1.19e-06 | 0.000109% | 0.0 | 1 | 0.00065  | 0.000219 | 0.000219 | 8.43e-06 | 0.00027%  |
| OTU_6070  | True  | ZB2     | 1.19e-06 | 0.000109% | 0.0 | 1 | 1.27e-05 | 0.000699 | 0.000636 | 6.83e-06 | 0.000219% |
| OTU_2885  | True  | PBS-25  | 1.19e-06 | 0.000108% | 0.0 | 1 | 0.000473 | 5.18e-06 | 4.45e-06 | 1.32e-06 | 4.22e-05% |
| L677      | False | koll11  | 1.19e-06 | 0.000108% | 0.0 | 1 | 0.00156  | 0.000216 | 0.000885 | 6.12e-06 | 0.000196% |
| L882      | False | koll11  | 1.18e-06 | 0.000108% | 0.0 | 1 | 0.00686  | 0.00134  | 0.0029   | 2.04e-06 | 6.54e-05% |
| L1578     | False | ZB2     | 1.18e-06 | 0.000108% | 0.0 | 1 | 0.000519 | 3.12e-05 | 6.95e-05 | 3.3e-06  | 0.000106% |
| OTU_6835  | True  | OD1     | 1.18e-06 | 0.000107% | 0.0 | 1 | 0.000154 | 0.0      | 1.65e-05 | 2.88e-06 | 9.21e-05% |
| L1287     | False | EW055   | 1.18e-06 | 0.000107% | 0.0 | 1 | 0.000402 | 0.0      | 0.0      | 2.52e-06 | 8.07e-05% |
| OTU_5878  | True  | OD1     | 1.17e-06 | 0.000107% | 0.0 | 1 | 0.000176 | 6.41e-05 | 1.68e-05 | 5.48e-06 | 0.000176% |
| OTU_6561  | True  | OD1     | 1.17e-06 | 0.000107% | 0.0 | 1 | 0.000106 | 2.25e-07 | 0.0      | 2.38e-06 | 7.62e-05% |
| OTU_5804  | True  | OD1     | 1.17e-06 | 0.000107% | 0.0 | 1 | 0.00045  | 0.0      | 2.87e-06 | 2.54e-06 | 8.15e-05% |
| L1577     | False | ZB2     | 1.17e-06 | 0.000106% | 0.0 | 1 | 0.000907 | 0.000318 | 9.79e-05 | 4.07e-06 | 0.00013%  |
| OTU_500   | True  | PBS-25  | 1.17e-06 | 0.000106% | 0.0 | 1 | 0.000164 | 0.0      | 5.37e-06 | 2.58e-06 | 8.25e-05% |
| L1033     | False | koll11  | 1.16e-06 | 0.000106% | 0.0 | 1 | 0.000507 | 6.34e-06 | 0.000951 | 5.81e-06 | 0.000186% |
| L1024     | False | koll11  | 1.16e-06 | 0.000106% | 0.0 | 1 | 0.0023   | 0.000112 | 0.000288 | 1.43e-06 | 4.58e-05% |
| L1465     | False | ZB2     | 1.15e-06 | 0.000104% | 0.0 | 1 | 0.000297 | 0.00267  | 0.00103  | 6.24e-06 | 0.0002%   |
| L1347     | False | ZB2     | 1.15e-06 | 0.000104% | 0.0 | 1 | 0.000632 | 8.69e-05 | 0.000177 | 3.21e-06 | 0.000103% |
| OTU_300   | True  | koll11  | 1.15e-06 | 0.000104% | 0.0 | 1 | 0.0      | 0.000137 | 0.0      | 2.93e-06 | 9.38e-05% |
| OTU_1795  | True  | koll11  | 1.14e-06 | 0.000104% | 0.0 | 1 | 0.000295 | 2.15e-05 | 1.77e-05 | 3.04e-06 | 9.73e-05% |
| L1436     | False | ZB2     | 1.13e-06 | 0.000103% | 0.0 | 1 | 0.00231  | 0.000376 | 0.000299 | 2.4e-06  | 7.68e-05% |
| OTU_10774 | True  | OP11-4  | 1.12e-06 | 0.000102% | 0.0 | 1 | 0.000152 | 0.0      | 0.0      | 2.38e-06 | 7.63e-05% |
| L1814     | False | OD1     | 1.12e-06 | 0.000102% | 0.0 | 1 | 0.00106  | 8.7e-05  | 0.000146 | 2.51e-06 | 8.03e-05% |
| L797      | False | PBS-25  | 1.12e-06 | 0.000102% | 0.0 | 1 | 0.000599 | 5.18e-06 | 4.45e-06 | 1.29e-06 | 4.15e-05% |
| L1398     | False | ZB2     | 1.12e-06 | 0.000102% | 0.0 | 1 | 0.00178  | 0.00225  | 0.00106  | 3.32e-05 | 0.00106%  |
| OTU_4019  | True  | koll11  | 1.12e-06 | 0.000102% | 0.0 | 1 | 0.0      | 0.0      | 0.000131 | 2.66e-06 | 8.51e-05% |
| L151      | False | ABY1    | 1.12e-06 | 0.000102% | 0.0 | 1 | 0.000766 | 0.00032  | 4.28e-05 | 4.33e-06 | 0.000139% |
| OTU_8644  | True  | ABY1    | 1.11e-06 | 0.000101% | 0.0 | 1 | 0.000504 | 0.000222 | 2.27e-05 | 3.74e-06 | 0.00012%  |
| OTU_965   | True  | PBS-25  | 1.1e-06  | 0.0001%   | 0.0 | 1 | 0.0      | 4.08e-05 | 0.000147 | 4.76e-06 | 0.000152% |
| OTU_1608  | True  | koll11  | 1.1e-06  | 0.0001%   | 0.0 | 1 | 0.000251 | 1.06e-05 | 0.0      | 2.33e-06 | 7.48e-05% |
| OTU_8324  | True  | ZB2     | 1.1e-06  | 0.0001%   | 0.0 | 1 | 0.0      | 4.14e-06 | 8.7e-05  | 2.73e-06 | 8.74e-05% |
| OTU_8787  | True  | ABY1    | 1.1e-06  | 0.0001%   | 0.0 | 1 | 7.23e-05 | 0.000283 | 3.96e-05 | 4.7e-06  | 0.000151% |
| OTU_266   | True  | koll11  | 1.1e-06  | 0.0001%   | 0.0 | 1 | 0.000342 | 6.9e-06  | 2.25e-05 | 2.37e-06 | 7.6e-05%  |
| OTU_6989  | True  | ABY1    | 1.1e-06  | 0.0001%   | 0.0 | 1 | 0.0001   | 6.2e-05  | 1.53e-05 | 8.73e-06 | 0.00028%  |
| OTU_2694  | True  | SJA-4   | 1.09e-06 | 9.94e-05% | 0.0 | 1 | 0.0      | 0.0      | 0.000153 | 3.32e-06 | 0.000106% |
| OTU_10757 | True  | OP11-4  | 1.09e-06 | 9.93e-05% | 0.0 | 1 | 0.000342 | 7.25e-05 | 7.26e-05 | 3.92e-06 | 0.000126% |
| OTU_8150  | True  | OP11-4  | 1.09e-06 | 9.89e-05% | 0.0 | 1 | 0.00011  | 0.0      | 9.17e-06 | 3.1e-06  | 9.93e-05% |
| OTU_6312  | True  | ZB2     | 1.08e-06 | 9.8e-05%  | 0.0 | 1 | 0.0012   | 0.000172 | 9.23e-05 | 2.65e-06 | 8.47e-05% |
| OTU_384   | True  | PBS-25  | 1.07e-06 | 9.75e-05% | 0.0 | 1 | 0.000175 | 9.67e-05 | 7.42e-08 | 4.56e-06 | 0.000146% |
| L880      | False | koll11  | 1.07e-06 | 9.72e-05% | 0.0 | 1 | 0.0069   | 0.00143  | 0.0029   | 1.92e-06 | 6.16e-05% |
| OTU_2628  | True  | SJA-4   | 1.06e-06 | 9.7e-05%  | 0.0 | 1 | 0.0      | 0.0      | 0.000161 | 3.2e-06  | 0.000103% |
| L691      | False | koll11  | 1.06e-06 | 9.68e-05% | 0.0 | 1 | 0.00281  | 0.00056  | 0.00141  | 3.54e-06 | 0.000114% |
| OTU_738   | True  | koll11  | 1.06e-06 | 9.65e-05% | 0.0 | 1 | 0.000172 | 6.02e-05 | 3.6e-06  | 5.24e-06 | 0.000168% |
| L471      | False | OP11-4  | 1.06e-06 | 9.63e-05% | 0.0 | 1 | 0.000133 | 3.05e-06 | 6.15e-06 | 2.26e-06 | 7.23e-05% |
| L897      | False | koll11  | 1.05e-06 | 9.54e-05% | 0.0 | 1 | 0.00186  | 0.000361 | 0.0011   | 4.48e-06 | 0.000144% |
| L819      | False | PBS-25  | 1.05e-06 | 9.53e-05% | 0.0 | 1 | 0.000498 | 0.00012  | 7.42e-08 | 2.36e-06 | 7.56e-05% |

|           |       |          |          |           |     |   |          |          |          |                    |                     |
|-----------|-------|----------|----------|-----------|-----|---|----------|----------|----------|--------------------|---------------------|
| L25       | False | Bacteria | 1.05e-06 | 9.53e-05% | 0.0 | 1 | 0.992    | 0.999    | 1.0      | -5.24329645217e-07 | -1.67960038543e-05% |
| OTU_388   | True  | koll11   | 1.04e-06 | 9.52e-05% | 0.0 | 1 | 0.000314 | 5.48e-05 | 0.0      | 1.94e-06           | 6.22e-05%           |
| L453      | False | OP11-4   | 1.04e-06 | 9.48e-05% | 0.0 | 1 | 0.00113  | 4.99e-05 | 0.000759 | 5.65e-06           | 0.000181%           |
| L1341     | False | ZB2      | 1.04e-06 | 9.47e-05% | 0.0 | 1 | 0.000409 | 0.000156 | 1.9e-05  | 3.73e-06           | 0.000119%           |
| L559      | False | SJA-4    | 1.04e-06 | 9.45e-05% | 0.0 | 1 | 0.002    | 0.000119 | 0.000603 | 3.87e-06           | 0.000124%           |
| L888      | False | koll11   | 1.04e-06 | 9.44e-05% | 0.0 | 1 | 0.000652 | 0.000216 | 0.000218 | 8.7e-06            | 0.000279%           |
| L1674     | False | OD1      | 1.03e-06 | 9.42e-05% | 0.0 | 1 | 0.000362 | 8.38e-05 | 0.00039  | 1.23e-05           | 0.000393%           |
| OTU_5249  | True  | OD1      | 1.03e-06 | 9.35e-05% | 0.0 | 1 | 0.000421 | 0.000101 | 1.47e-05 | 2.94e-06           | 9.41e-05%           |
| L22       | False | OD1      | 1.02e-06 | 9.29e-05% | 0.0 | 1 | 0.000259 | 7.24e-05 | 1.53e-05 | 2.95e-06           | 9.46e-05%           |
| OTU_4056  | True  | koll11   | 1.01e-06 | 9.18e-05% | 0.0 | 1 | 0.000487 | 2.66e-05 | 0.0      | 2.22e-06           | 7.11e-05%           |
| OTU_354   | True  | koll11   | 1e-06    | 9.14e-05% | 0.0 | 1 | 0.000364 | 0.0      | 1.66e-06 | 1.39e-06           | 4.46e-05%           |
| OTU_827   | True  | koll11   | 9.96e-07 | 9.07e-05% | 0.0 | 1 | 0.000203 | 0.0      | 0.0      | 2.65e-06           | 8.48e-05%           |
| L543      | False | SJA-4    | 9.93e-07 | 9.05e-05% | 0.0 | 1 | 0.00178  | 0.0003   | 0.00219  | 8.33e-06           | 0.000267%           |
| L1395     | False | ZB2      | 9.86e-07 | 8.98e-05% | 0.0 | 1 | 0.00275  | 0.000905 | 0.00112  | 8.96e-06           | 0.000287%           |
| OTU_433   | True  | PBS-25   | 9.8e-07  | 8.93e-05% | 0.0 | 1 | 0.000414 | 0.000104 | 0.000101 | 3.99e-06           | 0.000128%           |
| OTU_4832  | True  | ZB2      | 9.8e-07  | 8.92e-05% | 0.0 | 1 | 0.000167 | 4.07e-06 | 0.0      | 1.35e-06           | 4.32e-05%           |
| OTU_1558  | True  | PBS-25   | 9.76e-07 | 8.89e-05% | 0.0 | 1 | 0.000138 | 2.55e-05 | 0.0      | 3.13e-06           | 0.0001%             |
| OTU_5840  | True  | OD1      | 9.74e-07 | 8.87e-05% | 0.0 | 1 | 0.000198 | 0.000148 | 1.01e-05 | 5.73e-06           | 0.000184%           |
| L1868     | False | OD1      | 9.67e-07 | 8.81e-05% | 0.0 | 1 | 0.00133  | 0.000146 | 0.000181 | 1.87e-06           | 6e-05%              |
| OTU_6217  | True  | ZB2      | 9.64e-07 | 8.78e-05% | 0.0 | 1 | 0.0      | 2.28e-05 | 0.000188 | 2.78e-06           | 8.9e-05%            |
| OTU_9001  | True  | ABY1     | 9.58e-07 | 8.73e-05% | 0.0 | 1 | 0.000131 | 4.8e-05  | 1.75e-05 | 5.14e-06           | 0.000165%           |
| OTU_3762  | True  | SJA-4    | 9.58e-07 | 8.73e-05% | 0.0 | 1 | 0.000215 | 0.0      | 0.0      | 1.77e-06           | 5.68e-05%           |
| L1366     | False | ZB2      | 9.53e-07 | 8.68e-05% | 0.0 | 1 | 1.63e-06 | 0.00119  | 0.000341 | 1.69e-06           | 5.41e-05%           |
| OTU_365   | True  | koll11   | 9.5e-07  | 8.66e-05% | 0.0 | 1 | 0.000498 | 0.0      | 0.000122 | 3.43e-06           | 0.00011%            |
| L780      | False | PBS-25   | 9.48e-07 | 8.64e-05% | 0.0 | 1 | 0.000658 | 3.65e-05 | 7.42e-08 | 1.38e-06           | 4.41e-05%           |
| L1881     | False | OD1      | 9.45e-07 | 8.61e-05% | 0.0 | 1 | 0.000226 | 2.25e-07 | 0.0      | 1.46e-06           | 4.67e-05%           |
| OTU_6180  | True  | OD1      | 9.4e-07  | 8.57e-05% | 0.0 | 1 | 0.000366 | 0.000175 | 3.57e-06 | 3.31e-06           | 0.000106%           |
| OTU_8125  | True  | ABY1     | 9.37e-07 | 8.53e-05% | 0.0 | 1 | 0.000592 | 0.000328 | 7.2e-06  | 2.77e-06           | 8.88e-05%           |
| OTU_510   | True  | koll11   | 9.36e-07 | 8.53e-05% | 0.0 | 1 | 0.000393 | 2.95e-05 | 2.49e-05 | 2.12e-06           | 6.8e-05%            |
| OTU_6988  | True  | ZB2      | 9.33e-07 | 8.5e-05%  | 0.0 | 1 | 0.00175  | 0.000562 | 0.000938 | 9.48e-06           | 0.000304%           |
| OTU_1444  | True  | koll11   | 9.33e-07 | 8.49e-05% | 0.0 | 1 | 0.000332 | 8.13e-06 | 0.000329 | 3.76e-06           | 0.000121%           |
| OTU_6349  | True  | WCHB1-64 | 9.27e-07 | 8.45e-05% | 0.0 | 1 | 0.000316 | 6.01e-05 | 8.13e-05 | 4.24e-06           | 0.000136%           |
| OTU_8743  | True  | OD1      | 9.19e-07 | 8.37e-05% | 0.0 | 1 | 0.000241 | 0.0      | 0.0      | 1.7e-06            | 5.46e-05%           |
| OTU_9710  | True  | ABY1     | 9.14e-07 | 8.33e-05% | 0.0 | 1 | 0.000394 | 0.000134 | 6.12e-05 | 4.37e-06           | 0.00014%            |
| OTU_3117  | True  | koll11   | 9.11e-07 | 8.29e-05% | 0.0 | 1 | 0.000305 | 8.32e-05 | 0.000176 | 9.27e-06           | 0.000297%           |
| OTU_10854 | True  | OP11-4   | 9.1e-07  | 8.29e-05% | 0.0 | 1 | 0.000179 | 0.0      | 0.0      | 2.2e-06            | 7.05e-05%           |
| L1138     | False | koll11   | 9.07e-07 | 8.27e-05% | 0.0 | 1 | 0.000464 | 7.12e-06 | 2.25e-05 | 1.45e-06           | 4.64e-05%           |
| L1494     | False | ZB2      | 9.07e-07 | 8.26e-05% | 0.0 | 1 | 0.000641 | 0.000137 | 2.15e-05 | 1.7e-06            | 5.44e-05%           |
| OTU_7216  | True  | ZB2      | 9.06e-07 | 8.25e-05% | 0.0 | 1 | 0.00024  | 0.0      | 0.0      | 1.69e-06           | 5.42e-05%           |
| OTU_8246  | True  | OD1      | 8.99e-07 | 8.19e-05% | 0.0 | 1 | 0.0024   | 0.000179 | 9.29e-05 | 1.18e-06           | 3.79e-05%           |
| OTU_353   | True  | koll11   | 8.96e-07 | 8.16e-05% | 0.0 | 1 | 0.000579 | 0.000144 | 0.000248 | 7.33e-06           | 0.000235%           |
| OTU_2636  | True  | koll11   | 8.95e-07 | 8.16e-05% | 0.0 | 1 | 0.000105 | 0.0      | 4.74e-05 | 3.44e-06           | 0.00011%            |
| OTU_8112  | True  | ABY1     | 8.87e-07 | 8.08e-05% | 0.0 | 1 | 0.00209  | 0.000889 | 0.000121 | 1.88e-06           | 6.01e-05%           |
| OTU_152   | True  | ZB2      | 8.83e-07 | 8.04e-05% | 0.0 | 1 | 0.000223 | 7.22e-06 | 6.95e-05 | 3.67e-06           | 0.000117%           |
| L1418     | False | ZB2      | 8.83e-07 | 8.04e-05% | 0.0 | 1 | 0.000539 | 2.69e-05 | 0.000877 | 5.25e-06           | 0.000168%           |
| OTU_339   | True  | koll11   | 8.81e-07 | 8.02e-05% | 0.0 | 1 | 0.000692 | 9.41e-05 | 3.61e-05 | 3.68e-06           | 0.000118%           |
| L1217     | False | koll11   | 8.79e-07 | 8.01e-05% | 0.0 | 1 | 0.000181 | 3.39e-05 | 0.000469 | 7.83e-06           | 0.000251%           |
| OTU_5241  | True  | Mb-NB09  | 8.79e-07 | 8e-05%    | 0.0 | 1 | 0.0      | 0.000109 | 0.0      | 2.25e-06           | 7.21e-05%           |
| L446      | False | OP11-4   | 8.74e-07 | 7.96e-05% | 0.0 | 1 | 0.000217 | 2.07e-05 | 0.000134 | 4.27e-06           | 0.000137%           |
| L883      | False | koll11   | 8.73e-07 | 7.95e-05% | 0.0 | 1 | 0.00385  | 0.000732 | 0.000748 | 1.76e-06           | 5.65e-05%           |
| L629      | False | PBS-25   | 8.72e-07 | 7.94e-05% | 0.0 | 1 | 0.00229  | 0.000111 | 9.04e-05 | 1.91e-06           | 6.13e-05%           |
| L870      | False | koll11   | 8.6e-07  | 7.84e-05% | 0.0 | 1 | 0.000381 | 4.01e-05 | 1.57e-05 | 1.85e-06           | 5.92e-05%           |
| L1590     | False | OD1      | 8.58e-07 | 7.81e-05% | 0.0 | 1 | 0.0117   | 0.00919  | 0.00796  | 1.59e-05           | 0.00051%            |
| L903      | False | koll11   | 8.51e-07 | 7.75e-05% | 0.0 | 1 | 0.000919 | 0.000293 | 0.000736 | 8.74e-06           | 0.00028%            |
| L749      | False | PBS-25   | 8.5e-07  | 7.74e-05% | 0.0 | 1 | 0.000585 | 7.28e-05 | 0.0      | 2.03e-06           | 6.49e-05%           |
| L1255     | False | TM7-1    | 8.47e-07 | 7.71e-05% | 0.0 | 1 | 0.000134 | 0.0      | 0.0      | 2.05e-06           | 6.57e-05%           |
| OTU_6575  | True  | ZB2      | 8.46e-07 | 7.71e-05% | 0.0 | 1 | 0.00027  | 2.61e-05 | 5.44e-05 | 1.81e-06           | 5.79e-05%           |
| L1475     | False | ZB2      | 8.44e-07 | 7.69e-05% | 0.0 | 1 | 0.000787 | 0.000628 | 0.000412 | 2.73e-05           | 0.000876%           |
| OTU_16    | True  | ZB2      | 8.44e-07 | 7.69e-05% | 0.0 | 1 | 5.97e-05 | 0.0      | 0.0      | 1.43e-06           | 4.59e-05%           |
| OTU_6533  | True  | OD1      | 8.42e-07 | 7.67e-05% | 0.0 | 1 | 0.0      | 0.000495 | 0.000773 | 3.56e-06           | 0.000114%           |
| L1224     | False | koll11   | 8.41e-07 | 7.66e-05% | 0.0 | 1 | 0.000461 | 0.000197 | 0.000547 | 1.5e-05            | 0.000481%           |
| L401      | False | ABY1     | 8.38e-07 | 7.64e-05% | 0.0 | 1 | 0.00805  | 0.00243  | 0.00106  | 2e-06              | 6.42e-05%           |
| OTU_1456  | True  | kpj58rc  | 8.37e-07 | 7.63e-05% | 0.0 | 1 | 9.58e-05 | 6.28e-06 | 0.0      | 1.85e-06           | 5.92e-05%           |
| OTU_8761  | True  | OD1      | 8.36e-07 | 7.62e-05% | 0.0 | 1 | 0.00015  | 2.93e-05 | 6.68e-07 | 2.01e-06           | 6.43e-05%           |

|           |       |          |          |           |     |   |          |          |          |                    |                     |
|-----------|-------|----------|----------|-----------|-----|---|----------|----------|----------|--------------------|---------------------|
| OTU_10753 | True  | OP11-3   | 8.35e-07 | 7.61e-05% | 0.0 | 1 | 0.000188 | 7.81e-05 | 7.16e-05 | 1.14e-05           | 0.000365%           |
| OTU_7937  | True  | ABY1     | 8.33e-07 | 7.59e-05% | 0.0 | 1 | 0.000584 | 0.0      | 0.0      | 1.61e-06           | 5.15e-05%           |
| L865      | False | koll11   | 8.3e-07  | 7.56e-05% | 0.0 | 1 | 0.000695 | 6.24e-05 | 0.000182 | 2.03e-06           | 6.49e-05%           |
| OTU_10851 | True  | OP11-4   | 8.3e-07  | 7.56e-05% | 0.0 | 1 | 0.000133 | 2.25e-07 | 0.0      | 1.38e-06           | 4.42e-05%           |
| OTU_619   | True  | koll11   | 8.28e-07 | 7.54e-05% | 0.0 | 1 | 0.000195 | 1.71e-05 | 0.0      | 1.88e-06           | 6.01e-05%           |
| OTU_6585  | True  | ZB2      | 8.22e-07 | 7.49e-05% | 0.0 | 1 | 0.000178 | 5.77e-05 | 0.000151 | 1.29e-05           | 0.000413%           |
| L1066     | False | koll11   | 8.2e-07  | 7.47e-05% | 0.0 | 1 | 0.00153  | 5.52e-05 | 0.0002   | 1.72e-06           | 5.53e-05%           |
| L1254     | False | TM7-1    | 8.19e-07 | 7.46e-05% | 0.0 | 1 | 0.000358 | 3.22e-06 | 3.68e-05 | 1.61e-06           | 5.17e-05%           |
| OTU_4507  | True  | koll11   | 8.19e-07 | 7.46e-05% | 0.0 | 1 | 0.00011  | 2.2e-06  | 0.0      | 1.9e-06            | 6.09e-05%           |
| OTU_6160  | True  | ZB2      | 8.1e-07  | 7.38e-05% | 0.0 | 1 | 4.05e-05 | 0.000773 | 0.000683 | 2.27e-06           | 7.26e-05%           |
| L1907     | False | OD1      | 8.06e-07 | 7.34e-05% | 0.0 | 1 | 0.000881 | 5.34e-05 | 7.6e-06  | 1.1e-06            | 3.53e-05%           |
| OTU_6190  | True  | ZB2      | 7.98e-07 | 7.27e-05% | 0.0 | 1 | 0.000388 | 0.000287 | 2.84e-05 | 4.61e-06           | 0.000148%           |
| L316      | False | ABY1     | 7.95e-07 | 7.24e-05% | 0.0 | 1 | 0.000188 | 0.000665 | 0.000271 | 1.09e-05           | 0.00035%            |
| OTU_7173  | True  | OD1      | 7.91e-07 | 7.21e-05% | 0.0 | 1 | 0.000128 | 3.21e-06 | 3.67e-06 | 1.59e-06           | 5.1e-05%            |
| OTU_588   | True  | koll11   | 7.9e-07  | 7.2e-05%  | 0.0 | 1 | 7.71e-05 | 1.03e-05 | 0.0      | 1.88e-06           | 6.03e-05%           |
| L18       | False | OD1      | 7.88e-07 | 7.18e-05% | 0.0 | 1 | 0.000315 | 4.16e-05 | 6.93e-06 | 1.38e-06           | 4.42e-05%           |
| OTU_3345  | True  | PBS-25   | 7.86e-07 | 7.16e-05% | 0.0 | 1 | 0.000204 | 0.0      | 2.99e-07 | 1.45e-06           | 4.66e-05%           |
| L560      | False | SJA-4    | 7.84e-07 | 7.15e-05% | 0.0 | 1 | 0.000462 | 0.000119 | 2.18e-05 | 1.99e-06           | 6.39e-05%           |
| L1205     | False | koll11   | 7.81e-07 | 7.12e-05% | 0.0 | 1 | 0.000168 | 1.26e-05 | 8.48e-05 | 2.33e-06           | 7.46e-05%           |
| OTU_421   | True  | koll11   | 7.78e-07 | 7.09e-05% | 0.0 | 1 | 0.00068  | 2.06e-05 | 6.05e-06 | 9.13e-07           | 2.93e-05%           |
| OTU_129   | True  | OD1      | 7.69e-07 | 7.01e-05% | 0.0 | 1 | 9.49e-06 | 8.42e-05 | 4.39e-05 | 1.03e-05           | 0.000331%           |
| OTU_602   | True  | koll11   | 7.67e-07 | 6.99e-05% | 0.0 | 1 | 0.00023  | 9.68e-05 | 2.5e-05  | 4.33e-06           | 0.000139%           |
| OTU_8390  | True  | ABY1     | 7.67e-07 | 6.99e-05% | 0.0 | 1 | 0.000431 | 2.83e-05 | 5.3e-06  | 1.95e-06           | 6.25e-05%           |
| OTU_5626  | True  | OD1      | 7.63e-07 | 6.95e-05% | 0.0 | 1 | 0.00012  | 0.0      | 0.0      | 1.4e-06            | 4.47e-05%           |
| OTU_1428  | True  | GIF10    | 7.6e-07  | 6.93e-05% | 0.0 | 1 | 0.000104 | 5.84e-06 | 1.83e-05 | 2.71e-06           | 8.69e-05%           |
| L1233     | False | TM7      | 7.59e-07 | 6.92e-05% | 0.0 | 1 | 0.0118   | 0.0122   | 0.0104   | 0.000256           | 0.00819%            |
| OTU_2664  | True  | koll11   | 7.56e-07 | 6.88e-05% | 0.0 | 1 | 0.000108 | 2.32e-05 | 3.57e-06 | 2.67e-06           | 8.56e-05%           |
| OTU_282   | True  | koll11   | 7.55e-07 | 6.88e-05% | 0.0 | 1 | 0.000108 | 7.12e-06 | 3.8e-06  | 1.61e-06           | 5.14e-05%           |
| OTU_1061  | True  | PBS-25   | 7.55e-07 | 6.87e-05% | 0.0 | 1 | 9.77e-05 | 2.87e-05 | 0.0      | 3.62e-06           | 0.000116%           |
| OTU_9434  | True  | ABY1     | 7.54e-07 | 6.87e-05% | 0.0 | 1 | 0.00011  | 0.0      | 0.0      | 1.16e-06           | 3.72e-05%           |
| L3        | False | Bacteria | 7.53e-07 | 6.86e-05% | 0.0 | 1 | 0.997    | 1.0      | 1.0      | -9.57466410978e-08 | -3.06707997076e-06% |
| OTU_9703  | True  | Mb-NB09  | 7.48e-07 | 6.82e-05% | 0.0 | 1 | 0.000148 | 0.0      | 0.0      | 1.78e-06           | 5.72e-05%           |
| L545      | False | SJA-4    | 7.46e-07 | 6.79e-05% | 0.0 | 1 | 0.00044  | 0.00023  | 0.00198  | 3.78e-06           | 0.000121%           |
| OTU_6574  | True  | ZB2      | 7.44e-07 | 6.78e-05% | 0.0 | 1 | 0.00037  | 7.58e-05 | 2.15e-05 | 1.79e-06           | 5.72e-05%           |
| OTU_8350  | True  | ABY1     | 7.37e-07 | 6.71e-05% | 0.0 | 1 | 0.000102 | 0.0      | 0.0      | 1.2e-06            | 3.85e-05%           |
| L567      | False | SJA-4    | 7.34e-07 | 6.68e-05% | 0.0 | 1 | 0.000851 | 4.42e-07 | 0.000581 | 3.7e-06            | 0.000119%           |
| L21       | False | Bacteria | 7.32e-07 | 6.67e-05% | 0.0 | 1 | 0.993    | 0.999    | 1.0      | -3.71512318974e-07 | -1.1900762046e-05%  |
| OTU_1550  | True  | PRR-12   | 7.3e-07  | 6.65e-05% | 0.0 | 1 | 0.000213 | 2.06e-05 | 0.0      | 1.71e-06           | 5.48e-05%           |
| OTU_10816 | True  | OP11-4   | 7.3e-07  | 6.65e-05% | 0.0 | 1 | 0.00018  | 0.000103 | 5.43e-06 | 3.59e-06           | 0.000115%           |
| OTU_211   | True  | koll11   | 7.23e-07 | 6.59e-05% | 0.0 | 1 | 6.15e-05 | 9.65e-05 | 0.0      | 5.08e-06           | 0.000163%           |
| OTU_4039  | True  | koll11   | 7.16e-07 | 6.52e-05% | 0.0 | 1 | 0.000127 | 5.51e-05 | 0.0      | 3.2e-06            | 0.000102%           |
| OTU_6076  | True  | SM2F11   | 7.14e-07 | 6.51e-05% | 0.0 | 1 | 9.84e-05 | 1.62e-05 | 0.0      | 2.02e-06           | 6.46e-05%           |
| L675      | False | koll11   | 7.1e-07  | 6.47e-05% | 0.0 | 1 | 0.00202  | 0.000399 | 0.000909 | 3.61e-06           | 0.000116%           |
| OTU_8156  | True  | OP11-4   | 7.09e-07 | 6.46e-05% | 0.0 | 1 | 3.71e-05 | 3.85e-06 | 1.58e-05 | 3.83e-06           | 0.000123%           |
| OTU_5599  | True  | OD1      | 7.07e-07 | 6.44e-05% | 0.0 | 1 | 6.12e-05 | 0.000119 | 7.18e-06 | 5.01e-06           | 0.00016%            |
| OTU_4071  | True  | koll11   | 7.01e-07 | 6.39e-05% | 0.0 | 1 | 0.000398 | 2.4e-05  | 1.41e-05 | 1.39e-06           | 4.47e-05%           |
| OTU_8732  | True  | ABY1     | 6.96e-07 | 6.34e-05% | 0.0 | 1 | 0.000251 | 1.61e-05 | 9.53e-06 | 1.05e-06           | 3.35e-05%           |
| OTU_7016  | True  | ZB2      | 6.95e-07 | 6.33e-05% | 0.0 | 1 | 0.0      | 0.000136 | 2.78e-05 | 2.02e-06           | 6.46e-05%           |
| L591      | False | PRR-12   | 6.91e-07 | 6.29e-05% | 0.0 | 1 | 0.00204  | 0.000192 | 0.000216 | 9.99e-07           | 3.2e-05%            |
| OTU_4177  | True  | koll11   | 6.91e-07 | 6.29e-05% | 0.0 | 1 | 0.000197 | 2.11e-05 | 2.86e-05 | 2.62e-06           | 8.4e-05%            |
| L1216     | False | koll11   | 6.85e-07 | 6.24e-05% | 0.0 | 1 | 0.000844 | 0.000182 | 0.000539 | 6.08e-06           | 0.000195%           |
| L265      | False | ABY1     | 6.83e-07 | 6.22e-05% | 0.0 | 1 | 0.00264  | 0.00191  | 0.00125  | 1.36e-05           | 0.000436%           |
| L650      | False | koll11   | 6.79e-07 | 6.18e-05% | 0.0 | 1 | 0.000464 | 4.99e-05 | 4.5e-05  | 2.03e-06           | 6.5e-05%            |
| L1625     | False | OD1      | 6.76e-07 | 6.16e-05% | 0.0 | 1 | 0.000243 | 3.78e-05 | 5.48e-05 | 2.68e-06           | 8.57e-05%           |
| OTU_19    | True  | ZB2      | 6.75e-07 | 6.14e-05% | 0.0 | 1 | 0.000149 | 9.68e-06 | 2.29e-05 | 2.12e-06           | 6.78e-05%           |
| OTU_1538  | True  | PBS-25   | 6.7e-07  | 6.11e-05% | 0.0 | 1 | 0.000155 | 7.28e-05 | 0.0      | 3.19e-06           | 0.000102%           |
| OTU_6199  | True  | ZB2      | 6.64e-07 | 6.05e-05% | 0.0 | 1 | 0.000379 | 0.0      | 0.0      | 1.35e-06           | 4.33e-05%           |
| OTU_8181  | True  | OP11-4   | 6.59e-07 | 6.01e-05% | 0.0 | 1 | 0.000123 | 6.88e-06 | 4.42e-06 | 1.01e-06           | 3.24e-05%           |
| OTU_8065  | True  | ABY1     | 6.59e-07 | 6e-05%    | 0.0 | 1 | 3.68e-06 | 2.83e-05 | 0.0      | 2.64e-06           | 8.47e-05%           |
| L44       | False | OD1      | 6.56e-07 | 5.97e-05% | 0.0 | 1 | 0.113    | 0.152    | 0.0937   | 9.18e-06           | 0.000294%           |
| OTU_5311  | True  | OD1      | 6.52e-07 | 5.94e-05% | 0.0 | 1 | 0.000302 | 5.81e-05 | 2.57e-05 | 1.86e-06           | 5.97e-05%           |
| OTU_2434  | True  | SBRH58   | 6.51e-07 | 5.93e-05% | 0.0 | 1 | 0.0      | 2.49e-05 | 0.0      | 1.63e-06           | 5.22e-05%           |
| OTU_4986  | True  | ZB2      | 6.49e-07 | 5.91e-05% | 0.0 | 1 | 0.000384 | 2.73e-05 | 7.3e-05  | 1.95e-06           | 6.24e-05%           |

|           |       |        |          |           |     |   |          |          |          |          |           |
|-----------|-------|--------|----------|-----------|-----|---|----------|----------|----------|----------|-----------|
| L179      | False | SM2F11 | 6.48e-07 | 5.9e-05%  | 0.0 | 1 | 0.000339 | 4.29e-05 | 3.03e-05 | 1.37e-06 | 4.4e-05%  |
| OTU_8811  | True  | TM7-1  | 6.43e-07 | 5.86e-05% | 0.0 | 1 | 0.000145 | 5.69e-05 | 0.000141 | 1.05e-05 | 0.000335% |
| OTU_8045  | True  | OD1    | 6.36e-07 | 5.79e-05% | 0.0 | 1 | 0.000762 | 0.000285 | 0.000189 | 3.35e-06 | 0.000107% |
| OTU_2442  | True  | koll11 | 6.35e-07 | 5.79e-05% | 0.0 | 1 | 0.000123 | 1.91e-05 | 0.0      | 2.34e-06 | 7.5e-05%  |
| OTU_1067  | True  | koll11 | 6.3e-07  | 5.74e-05% | 0.0 | 1 | 0.000292 | 6.24e-05 | 0.000168 | 5.13e-06 | 0.000164% |
| OTU_10815 | True  | OP11-4 | 6.25e-07 | 5.7e-05%  | 0.0 | 1 | 0.0      | 0.0      | 4.93e-05 | 1.91e-06 | 6.11e-05% |
| OTU_912   | True  | BD4-9  | 6.18e-07 | 5.63e-05% | 0.0 | 1 | 0.000339 | 0.0      | 0.0      | 1.16e-06 | 3.7e-05%  |
| L1226     | False | koll11 | 6.17e-07 | 5.62e-05% | 0.0 | 1 | 0.000234 | 0.000158 | 0.000547 | 8.84e-06 | 0.000283% |
| OTU_7089  | True  | ABY1   | 6.09e-07 | 5.55e-05% | 0.0 | 1 | 0.000106 | 1.48e-05 | 8.98e-07 | 1.64e-06 | 5.27e-05% |
| OTU_8638  | True  | ABY1   | 6.07e-07 | 5.53e-05% | 0.0 | 1 | 0.000174 | 0.0      | 0.0      | 1.13e-06 | 3.63e-05% |
| OTU_402   | True  | PBS-25 | 6.03e-07 | 5.49e-05% | 0.0 | 1 | 0.0      | 0.0      | 0.000222 | 1.42e-06 | 4.54e-05% |
| L671      | False | koll11 | 5.94e-07 | 5.41e-05% | 0.0 | 1 | 0.000362 | 3.53e-05 | 2.86e-05 | 1.47e-06 | 4.71e-05% |
| OTU_7976  | True  | ABY1   | 5.91e-07 | 5.38e-05% | 0.0 | 1 | 2.65e-05 | 0.000178 | 3.12e-05 | 4.09e-06 | 0.000131% |
| OTU_5076  | True  | ZB2    | 5.83e-07 | 5.31e-05% | 0.0 | 1 | 0.000249 | 5.96e-05 | 0.000104 | 3.34e-06 | 0.000107% |
| L885      | False | koll11 | 5.83e-07 | 5.31e-05% | 0.0 | 1 | 0.00211  | 0.000556 | 0.000324 | 1.41e-06 | 4.53e-05% |
| OTU_6316  | True  | ZB2    | 5.8e-07  | 5.28e-05% | 0.0 | 1 | 0.000539 | 2.69e-05 | 3.65e-05 | 1e-06    | 3.21e-05% |
| OTU_4334  | True  | koll11 | 5.78e-07 | 5.27e-05% | 0.0 | 1 | 0.00123  | 0.000293 | 0.000568 | 3.18e-06 | 0.000102% |
| L1053     | False | koll11 | 5.75e-07 | 5.24e-05% | 0.0 | 1 | 0.00514  | 0.000513 | 0.000812 | 7.21e-07 | 2.31e-05% |
| OTU_456   | True  | koll11 | 5.72e-07 | 5.21e-05% | 0.0 | 1 | 0.000273 | 4.33e-05 | 3.98e-05 | 1.75e-06 | 5.61e-05% |
| OTU_4770  | True  | GIF10  | 5.71e-07 | 5.2e-05%  | 0.0 | 1 | 0.000317 | 8.83e-05 | 0.000209 | 7.04e-06 | 0.000225% |
| L1274     | False | TM7    | 5.71e-07 | 5.2e-05%  | 0.0 | 1 | 0.000101 | 6.43e-07 | 2.07e-05 | 1.52e-06 | 4.86e-05% |
| L1081     | False | koll11 | 5.61e-07 | 5.11e-05% | 0.0 | 1 | 0.000424 | 6.19e-05 | 4.2e-05  | 1.78e-06 | 5.71e-05% |
| L541      | False | SJA-4  | 5.61e-07 | 5.11e-05% | 0.0 | 1 | 0.00182  | 0.000324 | 0.0022   | 4.73e-06 | 0.000152% |
| OTU_10860 | True  | OP11   | 5.6e-07  | 5.1e-05%  | 0.0 | 1 | 0.000317 | 4.05e-05 | 1.05e-05 | 1e-06    | 3.21e-05% |
| L290      | False | ABY1   | 5.58e-07 | 5.08e-05% | 0.0 | 1 | 8.23e-05 | 0.0      | 1.7e-05  | 1.65e-06 | 5.27e-05% |
| OTU_1982  | True  | koll11 | 5.53e-07 | 5.04e-05% | 0.0 | 1 | 0.000152 | 5.4e-05  | 1.8e-05  | 3.09e-06 | 9.9e-05%  |
| OTU_5818  | True  | OD1    | 5.53e-07 | 5.03e-05% | 0.0 | 1 | 0.00169  | 0.000109 | 0.00049  | 1.11e-06 | 3.54e-05% |
| L901      | False | koll11 | 5.51e-07 | 5.02e-05% | 0.0 | 1 | 0.00125  | 0.000301 | 0.00107  | 3.25e-06 | 0.000104% |
| OTU_6059  | True  | ABY1   | 5.48e-07 | 4.99e-05% | 0.0 | 1 | 0.0      | 4.27e-05 | 7.9e-06  | 3.03e-06 | 9.71e-05% |
| OTU_305   | True  | PBS-25 | 5.42e-07 | 4.94e-05% | 0.0 | 1 | 0.000194 | 1.04e-05 | 0.000347 | 2.75e-06 | 8.82e-05% |
| OTU_4272  | True  | koll11 | 5.38e-07 | 4.9e-05%  | 0.0 | 1 | 0.00046  | 0.000183 | 2.4e-05  | 2.17e-06 | 6.95e-05% |
| OTU_9183  | True  | ABY1   | 5.34e-07 | 4.87e-05% | 0.0 | 1 | 0.000391 | 8.44e-05 | 3.12e-05 | 1.94e-06 | 6.21e-05% |
| OTU_1725  | True  | koll11 | 5.24e-07 | 4.77e-05% | 0.0 | 1 | 4.99e-05 | 0.0      | 0.0      | 1.15e-06 | 3.67e-05% |
| OTU_6645  | True  | ZB2    | 5.2e-07  | 4.73e-05% | 0.0 | 1 | 0.000183 | 2.92e-05 | 4.64e-05 | 2.1e-06  | 6.73e-05% |
| OTU_880   | True  | koll11 | 5.05e-07 | 4.6e-05%  | 0.0 | 1 | 8.47e-05 | 0.0      | 0.0      | 1.3e-06  | 4.16e-05% |
| OTU_7954  | True  | OD1    | 4.84e-07 | 4.41e-05% | 0.0 | 1 | 0.000733 | 0.000116 | 5.95e-05 | 1.53e-06 | 4.89e-05% |
| L1252     | False | TM7-1  | 4.82e-07 | 4.39e-05% | 0.0 | 1 | 0.000702 | 9.18e-05 | 5.98e-05 | 1.08e-06 | 3.45e-05% |
| OTU_603   | True  | koll11 | 4.78e-07 | 4.36e-05% | 0.0 | 1 | 0.00011  | 5.17e-06 | 0.0      | 1.13e-06 | 3.62e-05% |
| OTU_5955  | True  | OD1    | 4.78e-07 | 4.35e-05% | 0.0 | 1 | 0.000141 | 4.78e-05 | 1.31e-05 | 2.22e-06 | 7.1e-05%  |
| L1154     | False | koll11 | 4.74e-07 | 4.32e-05% | 0.0 | 1 | 0.00288  | 0.000648 | 0.00211  | 3.53e-06 | 0.000113% |
| OTU_3798  | True  | PBS-25 | 4.72e-07 | 4.3e-05%  | 0.0 | 1 | 0.000126 | 0.0      | 0.0      | 1.02e-06 | 3.27e-05% |
| OTU_718   | True  | PBS-25 | 4.7e-07  | 4.28e-05% | 0.0 | 1 | 0.000578 | 0.000137 | 3.47e-05 | 1.25e-06 | 4.01e-05% |
| L517      | False | OP11-3 | 4.66e-07 | 4.25e-05% | 0.0 | 1 | 0.000188 | 7.81e-05 | 7.16e-05 | 6.36e-06 | 0.000204% |
| OTU_5444  | True  | OD1    | 4.64e-07 | 4.23e-05% | 0.0 | 1 | 7.19e-05 | 2.42e-05 | 2.9e-06  | 2.02e-06 | 6.46e-05% |
| L637      | False | PBS-25 | 4.58e-07 | 4.17e-05% | 0.0 | 1 | 0.000254 | 1.53e-05 | 5.22e-06 | 1.16e-06 | 3.71e-05% |
| L1755     | False | OD1    | 4.55e-07 | 4.15e-05% | 0.0 | 1 | 0.000542 | 0.000495 | 0.00104  | 1.33e-05 | 0.000425% |
| L755      | False | PBS-25 | 4.51e-07 | 4.11e-05% | 0.0 | 1 | 0.00139  | 0.000149 | 9.12e-05 | 9.57e-07 | 3.07e-05% |
| OTU_9132  | True  | TM7    | 4.46e-07 | 4.06e-05% | 0.0 | 1 | 3.1e-05  | 0.0      | 0.0      | 8.95e-07 | 2.87e-05% |
| L891      | False | koll11 | 4.44e-07 | 4.04e-05% | 0.0 | 1 | 0.000433 | 0.000127 | 0.0      | 1.41e-06 | 4.51e-05% |
| OTU_7964  | True  | ABY1   | 4.43e-07 | 4.03e-05% | 0.0 | 1 | 8.82e-05 | 0.0      | 0.0      | 1.03e-06 | 3.31e-05% |
| L1477     | False | ZB2    | 4.41e-07 | 4.01e-05% | 0.0 | 1 | 0.000787 | 0.000492 | 0.000384 | 1.06e-05 | 0.000341% |
| OTU_875   | True  | koll11 | 4.37e-07 | 3.98e-05% | 0.0 | 1 | 0.000122 | 2.25e-07 | 0.0      | 8.82e-07 | 2.82e-05% |
| OTU_4170  | True  | koll11 | 4.35e-07 | 3.96e-05% | 0.0 | 1 | 3.05e-05 | 0.0      | 0.0      | 8.71e-07 | 2.79e-05% |
| OTU_1058  | True  | koll11 | 4.35e-07 | 3.96e-05% | 0.0 | 1 | 0.000624 | 0.000271 | 0.000719 | 7.26e-06 | 0.000233% |
| OTU_8179  | True  | EW055  | 4.34e-07 | 3.95e-05% | 0.0 | 1 | 0.000398 | 0.0      | 0.0      | 9.29e-07 | 2.98e-05% |
| L36       | False | ABY1   | 4.32e-07 | 3.94e-05% | 0.0 | 1 | 0.000351 | 1.93e-05 | 7.42e-08 | 6.2e-07  | 1.99e-05% |
| OTU_6006  | True  | OD1    | 4.24e-07 | 3.86e-05% | 0.0 | 1 | 2.14e-05 | 0.0      | 0.0      | 8.45e-07 | 2.71e-05% |
| OTU_10759 | True  | OP11-4 | 4.23e-07 | 3.86e-05% | 0.0 | 1 | 0.000492 | 0.000118 | 1.94e-05 | 7.57e-07 | 2.42e-05% |
| L288      | False | ABY1   | 4.2e-07  | 3.82e-05% | 0.0 | 1 | 0.000334 | 1.57e-05 | 1.7e-05  | 8.15e-07 | 2.61e-05% |
| L221      | False | ABY1   | 4.17e-07 | 3.8e-05%  | 0.0 | 1 | 0.00124  | 0.0022   | 0.00146  | 4.66e-05 | 0.00149%  |
| OTU_9588  | True  | ABY1   | 4.16e-07 | 3.79e-05% | 0.0 | 1 | 7.25e-05 | 0.0      | 1.7e-05  | 1.45e-06 | 4.64e-05% |
| OTU_6019  | True  | ABY1   | 4.15e-07 | 3.78e-05% | 0.0 | 1 | 0.000117 | 3.97e-05 | 4.61e-05 | 4.33e-06 | 0.000139% |
| OTU_675   | True  | PBS-25 | 4.15e-07 | 3.78e-05% | 0.0 | 1 | 0.000621 | 5.04e-05 | 7.59e-05 | 8.96e-07 | 2.87e-05% |
| OTU_287   | True  | koll11 | 4.12e-07 | 3.76e-05% | 0.0 | 1 | 0.000272 | 5.18e-05 | 1.6e-05  | 1.15e-06 | 3.69e-05% |



|          |       |          |          |           |     |   |          |          |          |                    |                     |
|----------|-------|----------|----------|-----------|-----|---|----------|----------|----------|--------------------|---------------------|
| OTU_1319 | True  | koll11   | 4.04e-07 | 3.68e-05% | 0.0 | 1 | 0.000217 | 3.28e-05 | 3.43e-05 | 1.68e-06           | 5.39e-05%           |
| OTU_9084 | True  | TM7-1    | 4.04e-07 | 3.68e-05% | 0.0 | 1 | 7.01e-05 | 6.43e-07 | 2.07e-05 | 1.54e-06           | 4.95e-05%           |
| OTU_5953 | True  | OD1      | 4.02e-07 | 3.66e-05% | 0.0 | 1 | 0.000418 | 0.0      | 9.24e-05 | 9.66e-07           | 3.09e-05%           |
| OTU_277  | True  | koll11   | 3.95e-07 | 3.6e-05%  | 0.0 | 1 | 0.000364 | 3.25e-06 | 0.000121 | 9.25e-07           | 2.96e-05%           |
| OTU_4088 | True  | koll11   | 3.95e-07 | 3.59e-05% | 0.0 | 1 | 0.000201 | 4.99e-05 | 4.5e-05  | 2.74e-06           | 8.79e-05%           |
| L1489    | False | ZB2      | 3.91e-07 | 3.56e-05% | 0.0 | 1 | 0.00044  | 6.5e-05  | 0.000116 | 1.19e-06           | 3.8e-05%            |
| OTU_424  | True  | PBS-25   | 3.9e-07  | 3.56e-05% | 0.0 | 1 | 0.000136 | 0.000204 | 1.48e-07 | 2.06e-06           | 6.58e-05%           |
| L27      | False | Bacteria | 3.85e-07 | 3.51e-05% | 0.0 | 1 | 0.991    | 0.999    | 1.0      | -2.8633961136e-07  | -9.17239995855e-06% |
| OTU_6157 | True  | ZB2      | 3.83e-07 | 3.49e-05% | 0.0 | 1 | 0.000369 | 9.9e-05  | 0.000107 | 1.88e-06           | 6.03e-05%           |
| OTU_6099 | True  | OD1      | 3.81e-07 | 3.47e-05% | 0.0 | 1 | 0.000265 | 3.34e-05 | 5.7e-06  | 1.37e-06           | 4.39e-05%           |
| OTU_397  | True  | koll11   | 3.79e-07 | 3.46e-05% | 0.0 | 1 | 0.000227 | 0.000163 | 3.43e-05 | 3.07e-06           | 9.83e-05%           |
| L617     | False | BD4-9    | 3.67e-07 | 3.34e-05% | 0.0 | 1 | 0.000119 | 1.39e-05 | 0.0      | 9.42e-07           | 3.02e-05%           |
| OTU_3150 | True  | TM6      | 3.65e-07 | 3.32e-05% | 0.0 | 1 | 0.000189 | 3.94e-05 | 3.98e-06 | 1.05e-06           | 3.37e-05%           |
| OTU_6251 | True  | ZB2      | 3.57e-07 | 3.25e-05% | 0.0 | 1 | 0.000201 | 4.55e-05 | 3.16e-05 | 1.74e-06           | 5.56e-05%           |
| OTU_8669 | True  | EW055    | 3.54e-07 | 3.23e-05% | 0.0 | 1 | 0.000152 | 0.0      | 6.28e-05 | 1.57e-06           | 5.03e-05%           |
| OTU_7113 | True  | ABY1     | 3.47e-07 | 3.16e-05% | 0.0 | 1 | 3.77e-05 | 3.46e-05 | 0.0      | 1.06e-06           | 3.4e-05%            |
| OTU_7939 | True  | OD1      | 3.47e-07 | 3.16e-05% | 0.0 | 1 | 8.07e-05 | 2.74e-05 | 6.75e-06 | 1.49e-06           | 4.77e-05%           |
| OTU_5435 | True  | OD1      | 3.47e-07 | 3.16e-05% | 0.0 | 1 | 0.000205 | 0.000154 | 5.12e-05 | 4.36e-06           | 0.00014%            |
| L11      | False | Bacteria | 3.46e-07 | 3.15e-05% | 0.0 | 1 | 0.994    | 0.999    | 1.0      | -7.75927753182e-08 | -2.48555191415e-06% |
| OTU_5883 | True  | OD1      | 3.4e-07  | 3.1e-05%  | 0.0 | 1 | 0.000135 | 1.04e-06 | 1.96e-05 | 8.76e-07           | 2.81e-05%           |
| L804     | False | PBS-25   | 3.38e-07 | 3.08e-05% | 0.0 | 1 | 1.66e-05 | 2.25e-07 | 0.000366 | 9.72e-07           | 3.11e-05%           |
| OTU_2708 | True  | koll11   | 3.34e-07 | 3.04e-05% | 0.0 | 1 | 0.000318 | 8.57e-05 | 9.3e-05  | 2.11e-06           | 6.77e-05%           |
| L570     | False | SJA-4    | 3.34e-07 | 3.04e-05% | 0.0 | 1 | 0.000167 | 1.47e-05 | 0.000161 | 3.06e-06           | 9.81e-05%           |
| OTU_528  | True  | koll11   | 3.33e-07 | 3.03e-05% | 0.0 | 1 | 0.000113 | 1.59e-05 | 2.36e-05 | 1.6e-06            | 5.13e-05%           |
| OTU_6066 | True  | OD1      | 3.3e-07  | 3.01e-05% | 0.0 | 1 | 2.2e-05  | 0.000136 | 2.01e-05 | 2.76e-06           | 8.85e-05%           |
| OTU_4179 | True  | koll11   | 3.3e-07  | 3.01e-05% | 0.0 | 1 | 0.00087  | 5.93e-05 | 0.000374 | 1.36e-06           | 4.35e-05%           |
| OTU_9719 | True  | Mb-NB09  | 3.29e-07 | 3e-05%    | 0.0 | 1 | 0.000102 | 0.0      | 7.5e-06  | 1.08e-06           | 3.46e-05%           |
| OTU_6920 | True  | OD1      | 3.29e-07 | 2.99e-05% | 0.0 | 1 | 0.000128 | 0.0      | 0.0      | 5.99e-07           | 1.92e-05%           |
| OTU_1096 | True  | koll11   | 3.28e-07 | 2.99e-05% | 0.0 | 1 | 0.000126 | 1.16e-05 | 2.58e-05 | 7.54e-07           | 2.41e-05%           |
| OTU_928  | True  | koll11   | 3.25e-07 | 2.96e-05% | 0.0 | 1 | 0.0      | 0.000117 | 0.0      | 1.05e-06           | 3.36e-05%           |
| OTU_8795 | True  | Mb-NB09  | 3.21e-07 | 2.92e-05% | 0.0 | 1 | 0.000184 | 5.77e-05 | 0.000165 | 3.26e-06           | 0.000104%           |
| OTU_8641 | True  | ABY1     | 3.12e-07 | 2.84e-05% | 0.0 | 1 | 0.000105 | 0.0      | 0.0      | 6.39e-07           | 2.05e-05%           |
| OTU_8162 | True  | ABY1     | 3.04e-07 | 2.77e-05% | 0.0 | 1 | 0.0      | 2.25e-07 | 2.47e-05 | 7.3e-07            | 2.34e-05%           |
| OTU_468  | True  | koll11   | 3.01e-07 | 2.74e-05% | 0.0 | 1 | 5.52e-05 | 3.5e-05  | 1.18e-05 | 3.39e-06           | 0.000109%           |
| OTU_7852 | True  | ZB2      | 3.01e-07 | 2.74e-05% | 0.0 | 1 | 5.52e-05 | 0.0      | 0.0      | 8.08e-07           | 2.59e-05%           |
| L219     | False | ABY1     | 3.01e-07 | 2.74e-05% | 0.0 | 1 | 0.00167  | 0.00223  | 0.00149  | 5.92e-05           | 0.0019%             |
| OTU_485  | True  | koll11   | 2.96e-07 | 2.7e-05%  | 0.0 | 1 | 0.000141 | 0.0      | 9.92e-07 | 5.6e-07            | 1.79e-05%           |
| OTU_9063 | True  | Mb-NB09  | 2.93e-07 | 2.67e-05% | 0.0 | 1 | 0.000269 | 7.65e-06 | 0.0      | 4.79e-07           | 1.54e-05%           |
| OTU_2288 | True  | PBS-25   | 2.9e-07  | 2.64e-05% | 0.0 | 1 | 5.75e-05 | 1.3e-05  | 0.0      | 8.56e-07           | 2.74e-05%           |
| L1156    | False | koll11   | 2.87e-07 | 2.61e-05% | 0.0 | 1 | 0.00278  | 0.000611 | 0.00211  | 2.2e-06            | 7.05e-05%           |
| OTU_8023 | True  | ABY1     | 2.83e-07 | 2.58e-05% | 0.0 | 1 | 1.31e-05 | 3.17e-05 | 0.0      | 1.78e-06           | 5.71e-05%           |
| L869     | False | koll11   | 2.81e-07 | 2.56e-05% | 0.0 | 1 | 0.000863 | 4.52e-05 | 1.57e-05 | 4.15e-07           | 1.33e-05%           |
| L1211    | False | GIF10    | 2.78e-07 | 2.54e-05% | 0.0 | 1 | 0.0002   | 1.21e-05 | 1.83e-05 | 6.37e-07           | 2.04e-05%           |
| OTU_5486 | True  | OD1      | 2.76e-07 | 2.52e-05% | 0.0 | 1 | 0.000165 | 0.0      | 0.0      | 5.63e-07           | 1.8e-05%            |
| L515     | False | OP11-3   | 2.65e-07 | 2.41e-05% | 0.0 | 1 | 0.000195 | 8.71e-05 | 7.23e-05 | 3.55e-06           | 0.000114%           |
| OTU_6642 | True  | ZB2      | 2.64e-07 | 2.41e-05% | 0.0 | 1 | 0.000197 | 1.71e-05 | 0.0      | 5.56e-07           | 1.78e-05%           |
| OTU_427  | True  | koll11   | 2.6e-07  | 2.37e-05% | 0.0 | 1 | 9.66e-05 | 3.7e-05  | 0.0      | 1.05e-06           | 3.35e-05%           |
| L679     | False | koll11   | 2.6e-07  | 2.37e-05% | 0.0 | 1 | 0.000824 | 0.000146 | 0.000842 | 2.23e-06           | 7.15e-05%           |
| OTU_1496 | True  | koll11   | 2.58e-07 | 2.35e-05% | 0.0 | 1 | 3.65e-05 | 8.83e-05 | 0.0      | 1.24e-06           | 3.97e-05%           |
| L1030    | False | koll11   | 2.48e-07 | 2.26e-05% | 0.0 | 1 | 0.00105  | 0.000158 | 0.000976 | 1.75e-06           | 5.6e-05%            |
| OTU_8328 | True  | OD1      | 2.48e-07 | 2.26e-05% | 0.0 | 1 | 0.000134 | 3.11e-05 | 6.86e-05 | 2.05e-06           | 6.55e-05%           |
| OTU_5270 | True  | OD1      | 2.44e-07 | 2.22e-05% | 0.0 | 1 | 0.000142 | 2.63e-05 | 1.72e-05 | 1.31e-06           | 4.19e-05%           |
| OTU_6085 | True  | ZB2      | 2.4e-07  | 2.18e-05% | 0.0 | 1 | 0.000188 | 0.0      | 4e-06    | 5.16e-07           | 1.65e-05%           |
| OTU_3602 | True  | PBS-25   | 2.33e-07 | 2.12e-05% | 0.0 | 1 | 0.000111 | 1.31e-05 | 3.53e-05 | 7.32e-07           | 2.35e-05%           |
| OTU_1514 | True  | koll11   | 2.3e-07  | 2.1e-05%  | 0.0 | 1 | 9.16e-05 | 2.49e-05 | 0.0      | 8.15e-07           | 2.61e-05%           |
| OTU_6516 | True  | OD1      | 2.26e-07 | 2.06e-05% | 0.0 | 1 | 8.44e-05 | 4.78e-05 | 1.68e-05 | 2.46e-06           | 7.87e-05%           |
| L448     | False | OP11-4   | 2.24e-07 | 2.04e-05% | 0.0 | 1 | 0.000133 | 7.96e-06 | 0.000113 | 1.14e-06           | 3.65e-05%           |
| OTU_1439 | True  | koll11   | 2.19e-07 | 1.99e-05% | 0.0 | 1 | 0.000121 | 3.6e-05  | 0.0      | 7.45e-07           | 2.39e-05%           |
| OTU_9194 | True  | ABY1     | 2.17e-07 | 1.98e-05% | 0.0 | 1 | 6.26e-05 | 0.0      | 1.9e-05  | 8.12e-07           | 2.6e-05%            |
| OTU_2845 | True  | PBS-25   | 2.14e-07 | 1.95e-05% | 0.0 | 1 | 0.000426 | 0.000232 | 0.000135 | 1.99e-06           | 6.38e-05%           |
| OTU_3297 | True  | PBS-25   | 2.13e-07 | 1.94e-05% | 0.0 | 1 | 0.000388 | 0.000113 | 0.00028  | 1.54e-06           | 4.94e-05%           |
| OTU_8041 | True  | TM7-3    | 2.09e-07 | 1.9e-05%  | 0.0 | 1 | 6.68e-05 | 0.0      | 0.0      | 4.77e-07           | 1.53e-05%           |
| OTU_1626 | True  | PBS-25   | 2.06e-07 | 1.87e-05% | 0.0 | 1 | 0.000229 | 0.0      | 0.0      | 3.45e-07           | 1.1e-05%            |

|           |       |         |          |           |       |   |          |          |          |          |           |
|-----------|-------|---------|----------|-----------|-------|---|----------|----------|----------|----------|-----------|
| L668      | False | koll11  | 2.04e-07 | 1.86e-05% | 0.0   | 1 | 0.000243 | 5.27e-05 | 0.000162 | 1.65e-06 | 5.28e-05% |
| OTU_7059  | True  | ZB2     | 2.02e-07 | 1.84e-05% | 0.0   | 1 | 7.22e-05 | 0.000151 | 6.94e-06 | 1.05e-06 | 3.36e-05% |
| OTU_2801  | True  | PBS-25  | 2e-07    | 1.82e-05% | 0.0   | 1 | 1.6e-05  | 3.87e-05 | 7.42e-08 | 1.17e-06 | 3.75e-05% |
| OTU_1305  | True  | TM6     | 1.97e-07 | 1.79e-05% | 0.0   | 1 | 2.12e-06 | 8.05e-05 | 0.000167 | 8.46e-07 | 2.71e-05% |
| L1439     | False | ZB2     | 1.94e-07 | 1.76e-05% | 0.0   | 1 | 0.000353 | 0.000102 | 0.000118 | 1.37e-06 | 4.37e-05% |
| OTU_2611  | True  | SJA-4   | 1.9e-07  | 1.73e-05% | 0.0   | 1 | 7.43e-05 | 0.000119 | 2.99e-07 | 8.1e-07  | 2.6e-05%  |
| L217      | False | ABY1    | 1.89e-07 | 1.73e-05% | 0.0   | 1 | 0.00183  | 0.00227  | 0.00149  | 2.52e-05 | 0.000806% |
| L1640     | False | ZB2     | 1.87e-07 | 1.71e-05% | 0.0   | 1 | 7.3e-06  | 0.0      | 1.48e-07 | 5.06e-07 | 1.62e-05% |
| OTU_8089  | True  | ABY1    | 1.86e-07 | 1.7e-05%  | 0.0   | 1 | 0.0      | 5.01e-05 | 6.65e-05 | 1.17e-06 | 3.76e-05% |
| OTU_136   | True  | OD1     | 1.84e-07 | 1.67e-05% | 0.0   | 1 | 4.41e-05 | 3.67e-05 | 0.0      | 9.17e-07 | 2.94e-05% |
| OTU_643   | True  | koll11  | 1.81e-07 | 1.65e-05% | 0.0   | 1 | 0.00028  | 0.000237 | 2.07e-05 | 1.1e-06  | 3.52e-05% |
| OTU_10804 | True  | OP11-4  | 1.81e-07 | 1.65e-05% | 0.0   | 1 | 0.000387 | 1.28e-05 | 0.000102 | 5.04e-07 | 1.61e-05% |
| L531      | False | TM6     | 1.72e-07 | 1.57e-05% | 0.0   | 1 | 0.000191 | 0.00012  | 0.000171 | 7.72e-06 | 0.000247% |
| OTU_8167  | True  | ZB2     | 1.72e-07 | 1.57e-05% | 0.0   | 1 | 0.000164 | 3.65e-05 | 0.000225 | 1.38e-06 | 4.41e-05% |
| OTU_6580  | True  | ZB2     | 1.7e-07  | 1.55e-05% | 0.0   | 1 | 2.1e-05  | 7.22e-05 | 0.000102 | 3.34e-06 | 0.000107% |
| OTU_878   | True  | koll11  | 1.65e-07 | 1.51e-05% | 0.0   | 1 | 0.000104 | 8e-06    | 1.64e-05 | 6.01e-07 | 1.92e-05% |
| L965      | False | koll11  | 1.58e-07 | 1.44e-05% | 0.0   | 1 | 0.000607 | 0.000328 | 9.89e-05 | 9.81e-07 | 3.14e-05% |
| OTU_10738 | True  | OP11-3  | 1.56e-07 | 1.42e-05% | 0.003 | 0 | 7.2e-06  | 8.98e-06 | 6.73e-07 | 1.42e-06 | 4.54e-05% |
| OTU_7092  | True  | OD1     | 1.53e-07 | 1.39e-05% | 0.0   | 1 | 3.94e-05 | 4.44e-05 | 1.05e-05 | 2.28e-06 | 7.29e-05% |
| OTU_1331  | True  | koll11  | 1.43e-07 | 1.3e-05%  | 0.0   | 1 | 4.22e-05 | 1.02e-06 | 5.9e-05  | 6.23e-07 | 2e-05%    |
| OTU_5359  | True  | Mb-NB09 | 1.42e-07 | 1.29e-05% | 0.0   | 1 | 8.11e-05 | 9.71e-07 | 3.6e-06  | 3.83e-07 | 1.23e-05% |
| OTU_6684  | True  | ZB2     | 1.41e-07 | 1.28e-05% | 0.0   | 1 | 0.00017  | 3.89e-05 | 6.14e-05 | 9.64e-07 | 3.09e-05% |
| OTU_4389  | True  | koll11  | 1.37e-07 | 1.25e-05% | 0.0   | 1 | 0.000714 | 0.000144 | 0.000842 | 1.33e-06 | 4.25e-05% |
| OTU_459   | True  | koll11  | 1.37e-07 | 1.25e-05% | 0.0   | 1 | 0.000545 | 0.000232 | 9.89e-05 | 8.08e-07 | 2.59e-05% |
| OTU_1383  | True  | koll11  | 1.25e-07 | 1.14e-05% | 0.0   | 1 | 0.0      | 2.06e-05 | 0.0      | 3.19e-07 | 1.02e-05% |
| OTU_6231  | True  | ZB2     | 1.22e-07 | 1.12e-05% | 0.0   | 1 | 3.9e-06  | 2.73e-05 | 1.3e-06  | 5.95e-07 | 1.91e-05% |
| OTU_8017  | True  | ABY1    | 1.22e-07 | 1.11e-05% | 0.0   | 1 | 0.0      | 5.88e-05 | 2.7e-05  | 2.27e-07 | 7.28e-06% |
| OTU_4502  | True  | koll11  | 1.21e-07 | 1.11e-05% | 0.0   | 1 | 0.000198 | 2.25e-07 | 0.0      | 2.6e-07  | 8.34e-06% |
| L1032     | False | koll11  | 1.21e-07 | 1.1e-05%  | 0.0   | 1 | 0.000737 | 0.000103 | 0.000976 | 8.79e-07 | 2.82e-05% |
| OTU_1646  | True  | PBS-25  | 1.19e-07 | 1.08e-05% | 0.0   | 1 | 0.000158 | 2.26e-05 | 0.000107 | 1.1e-06  | 3.52e-05% |
| OTU_9018  | True  | Mb-NB09 | 1.17e-07 | 1.07e-05% | 0.0   | 1 | 7.7e-05  | 2.11e-05 | 4.57e-05 | 1.5e-06  | 4.8e-05%  |
| OTU_2558  | True  | SJA-4   | 1.15e-07 | 1.05e-05% | 0.0   | 1 | 4.21e-05 | 2.43e-05 | 1.53e-05 | 2.4e-06  | 7.68e-05% |
| OTU_8234  | True  | ABY1    | 1.11e-07 | 1.01e-05% | 0.0   | 1 | 7.93e-05 | 7.62e-05 | 2.31e-05 | 1.92e-06 | 6.15e-05% |
| OTU_5924  | True  | OD1     | 1.08e-07 | 9.87e-06% | 0.0   | 1 | 0.000122 | 5.02e-05 | 3.71e-07 | 3.84e-07 | 1.23e-05% |
| L898      | False | koll11  | 1.03e-07 | 9.38e-06% | 0.0   | 1 | 0.000611 | 5.95e-05 | 3.43e-05 | 3.22e-07 | 1.03e-05% |
| OTU_1374  | True  | PBS-25  | 9.97e-08 | 9.08e-06% | 0.0   | 1 | 5.49e-05 | 9.98e-06 | 0.0      | 3.18e-07 | 1.02e-05% |
| OTU_4774  | True  | koll11  | 9.89e-08 | 9.01e-06% | 0.0   | 1 | 0.000232 | 0.000146 | 0.000153 | 4.44e-06 | 0.000142% |
| OTU_1117  | True  | BD4-9   | 9.88e-08 | 9e-06%    | 0.0   | 1 | 0.0      | 1.39e-05 | 0.0      | 2.54e-07 | 8.13e-06% |
| L1619     | False | OD1     | 9.73e-08 | 8.87e-06% | 0.0   | 1 | 0.00229  | 0.00153  | 0.000928 | 1.1e-06  | 3.52e-05% |
| OTU_3007  | True  | koll11  | 9.71e-08 | 8.84e-06% | 0.0   | 1 | 0.000138 | 5.27e-05 | 0.000114 | 1.78e-06 | 5.7e-05%  |
| OTU_9148  | True  | ABY1    | 9.64e-08 | 8.78e-06% | 0.0   | 1 | 1.07e-05 | 0.0      | 0.0      | 2.46e-07 | 7.89e-06% |
| OTU_8738  | True  | OD1     | 9.43e-08 | 8.59e-06% | 0.0   | 1 | 0.0      | 1.67e-05 | 0.0      | 3.17e-07 | 1.02e-05% |
| OTU_9129  | True  | Mb-NB09 | 9.32e-08 | 8.49e-06% | 0.0   | 1 | 4.43e-05 | 2.19e-05 | 7.01e-07 | 4.62e-07 | 1.48e-05% |
| OTU_460   | True  | koll11  | 8.87e-08 | 8.08e-06% | 0.0   | 1 | 2.23e-05 | 0.0      | 0.0      | 2.22e-07 | 7.11e-06% |
| OTU_1344  | True  | PBS-25  | 8.7e-08  | 7.92e-06% | 0.0   | 1 | 4.08e-05 | 0.0      | 2.07e-05 | 3.73e-07 | 1.19e-05% |
| OTU_8890  | True  | ABY1    | 8.48e-08 | 7.73e-06% | 0.0   | 1 | 0.0      | 6.97e-06 | 0.0      | 2.18e-07 | 7e-06%    |
| OTU_6282  | True  | OD1     | 8.47e-08 | 7.72e-06% | 0.004 | 0 | 0.0      | 4.89e-06 | 0.0      | 1.94e-07 | 6.2e-06%  |
| OTU_9088  | True  | ABY1    | 8.32e-08 | 7.58e-06% | 0.0   | 1 | 9.8e-06  | 0.0      | 0.0      | 1.67e-07 | 5.34e-06% |
| OTU_6617  | True  | ZB2     | 8.21e-08 | 7.48e-06% | 0.0   | 1 | 0.0      | 3.73e-05 | 4.16e-05 | 4.47e-07 | 1.43e-05% |
| OTU_8154  | True  | OP11-4  | 8.07e-08 | 7.35e-06% | 0.0   | 1 | 8.47e-05 | 1.28e-05 | 2.06e-05 | 4.4e-07  | 1.41e-05% |
| OTU_9100  | True  | TM7     | 8.05e-08 | 7.33e-06% | 0.0   | 1 | 5.47e-06 | 0.0      | 0.0      | 2.01e-07 | 6.43e-06% |
| OTU_386   | True  | PBS-25  | 7.66e-08 | 6.97e-06% | 0.0   | 1 | 4.21e-05 | 0.0      | 4.24e-06 | 2.63e-07 | 8.41e-06% |
| L223      | False | ABY1    | 7.16e-08 | 6.52e-06% | 0.0   | 1 | 0.00122  | 0.00136  | 0.00103  | 3.08e-05 | 0.000986% |
| L1159     | False | koll11  | 6.75e-08 | 6.15e-06% | 0.0   | 1 | 0.000254 | 1.59e-05 | 2.46e-05 | 1.58e-07 | 5.05e-06% |
| OTU_2809  | True  | SJA-4   | 6.7e-08  | 6.1e-06%  | 0.002 | 0 | 0.0      | 5.88e-06 | 0.0      | 1.94e-07 | 6.21e-06% |
| L1235     | False | TM7     | 6.69e-08 | 6.1e-06%  | 0.0   | 1 | 0.0113   | 0.0122   | 0.0104   | 0.000146 | 0.00466%  |
| OTU_3013  | True  | PBS-25  | 6.49e-08 | 5.92e-06% | 0.0   | 1 | 1.66e-05 | 2.25e-07 | 0.0      | 1.48e-07 | 4.76e-06% |
| OTU_8165  | True  | ABY1    | 6.47e-08 | 5.9e-06%  | 0.0   | 1 | 3.75e-05 | 1.34e-05 | 3.14e-05 | 1.46e-06 | 4.68e-05% |
| OTU_4497  | True  | koll11  | 6.13e-08 | 5.58e-06% | 0.0   | 1 | 0.000165 | 1.42e-05 | 0.0      | 1.67e-07 | 5.34e-06% |
| OTU_1883  | True  | koll11  | 6e-08    | 5.47e-06% | 0.0   | 1 | 0.000162 | 1.88e-05 | 1.07e-05 | 1.87e-07 | 5.98e-06% |
| OTU_4959  | True  | ZB2     | 5.93e-08 | 5.4e-06%  | 0.0   | 1 | 0.0      | 1.41e-05 | 9.8e-06  | 5.22e-07 | 1.67e-05% |
| OTU_8032  | True  | ABY1    | 5.68e-08 | 5.18e-06% | 0.0   | 1 | 0.0      | 1.45e-05 | 0.0      | 1.44e-07 | 4.61e-06% |
| OTU_4864  | True  | GIF10   | 5.26e-08 | 4.8e-06%  | 0.0   | 1 | 0.000107 | 9.66e-06 | 0.0      | 1.24e-07 | 3.99e-06% |
| OTU_831   | True  | koll11  | 5.09e-08 | 4.63e-06% | 0.0   | 1 | 0.00031  | 3.66e-05 | 0.0      | 1.2e-07  | 3.84e-06% |
| L1362     | False | OD1     | 4.97e-08 | 4.53e-06% | 0.0   | 1 | 0.0826   | 0.739    | 0.774    | 5.56e-09 | 1.78e-07% |

|           |       |          |          |           |         |   |          |          |          |          |           |
|-----------|-------|----------|----------|-----------|---------|---|----------|----------|----------|----------|-----------|
| L1377     | False | OD1      | 4.85e-08 | 4.42e-06% | 0.0     | 1 | 0.015    | 0.599    | 0.456    | 1.62e-08 | 5.18e-07% |
| OTU_8159  | True  | ABY1     | 4.66e-08 | 4.24e-06% | 0.00701 | 0 | 0.0      | 4.07e-06 | 6.93e-06 | 3.18e-07 | 1.02e-05% |
| OTU_464   | True  | koll11   | 4.49e-08 | 4.09e-06% | 0.002   | 0 | 5.34e-06 | 7.1e-06  | 0.0      | 3.23e-07 | 1.03e-05% |
| OTU_1326  | True  | PBS-25   | 4.48e-08 | 4.08e-06% | 0.0     | 1 | 6.18e-06 | 0.0      | 0.0      | 8.81e-08 | 2.82e-06% |
| OTU_6696  | True  | ZB2      | 4.28e-08 | 3.9e-06%  | 0.0     | 1 | 7.3e-06  | 0.0      | 0.0      | 1.07e-07 | 3.43e-06% |
| OTU_8175  | True  | TM7-3    | 4.22e-08 | 3.85e-06% | 0.0     | 1 | 1.75e-05 | 0.0      | 0.0      | 7.35e-08 | 2.35e-06% |
| L1364     | False | OD1      | 4.18e-08 | 3.81e-06% | 0.0     | 1 | 0.0701   | 0.688    | 0.58     | 9.96e-09 | 3.19e-07% |
| OTU_10899 | True  | OP11-4   | 4.07e-08 | 3.7e-06%  | 0.0     | 1 | 6.01e-06 | 2.05e-06 | 0.0      | 2.05e-07 | 6.57e-06% |
| OTU_8084  | True  | ABY1     | 3.89e-08 | 3.54e-06% | 0.0     | 1 | 0.000142 | 0.00011  | 0.000211 | 1.83e-06 | 5.85e-05% |
| OTU_10835 | True  | OP11-4   | 3.76e-08 | 3.43e-06% | 0.0541  | 0 | 4.73e-07 | 2.82e-06 | 6.15e-06 | 3.94e-07 | 1.26e-05% |
| OTU_9123  | True  | ABY1     | 3.6e-08  | 3.28e-06% | 0.001   | 0 | 0.0      | 1.02e-06 | 7.13e-06 | 1.78e-07 | 5.69e-06% |
| OTU_8186  | True  | OD1      | 3.06e-08 | 2.78e-06% | 0.0     | 1 | 0.0      | 0.0      | 3.57e-06 | 9.8e-08  | 3.14e-06% |
| OTU_8172  | True  | EW055    | 2.76e-08 | 2.51e-06% | 0.0     | 1 | 4.25e-06 | 0.0      | 0.0      | 7.26e-08 | 2.33e-06% |
| L529      | False | TM6      | 2.72e-08 | 2.48e-06% | 0.0     | 1 | 0.000191 | 0.000145 | 0.000171 | 2.49e-06 | 7.98e-05% |
| OTU_8169  | True  | TM7-3    | 2.46e-08 | 2.24e-06% | 0.0     | 1 | 4.01e-06 | 0.0      | 0.0      | 5.23e-08 | 1.67e-06% |
| OTU_4166  | True  | koll11   | 2.4e-08  | 2.19e-06% | 0.0     | 1 | 5.44e-06 | 0.0      | 0.0      | 6.32e-08 | 2.03e-06% |
| OTU_4996  | True  | GIF10    | 1.97e-08 | 1.8e-06%  | 0.0     | 1 | 1.51e-06 | 0.0      | 0.0      | 3.99e-08 | 1.28e-06% |
| OTU_5992  | True  | ZB2      | 1.82e-08 | 1.66e-06% | 0.0     | 1 | 0.00164  | 0.22     | 0.127    | 2.55e-08 | 8.15e-07% |
| OTU_1177  | True  | OP3      | 1.79e-08 | 1.63e-06% | 0.001   | 0 | 0.000137 | 0.000112 | 0.000113 | 2.52e-06 | 8.08e-05% |
| L970      | False | koll11   | 1.28e-08 | 1.16e-06% | 0.0     | 1 | 0.175    | 0.0204   | 0.0281   | 2.68e-09 | 8.57e-08% |
| OTU_6682  | True  | ZB2      | 1.1e-08  | 9.99e-07% | 0.0     | 1 | 0.0      | 0.0      | 6.86e-06 | 2.13e-08 | 6.81e-07% |
| OTU_188   | True  | koll11   | 1.02e-08 | 9.27e-07% | 0.101   | 0 | 1.81e-06 | 1.6e-07  | 0.0      | 2.75e-08 | 8.81e-07% |
| OTU_2868  | True  | SJA-4    | 7.02e-09 | 6.39e-07% | 0.148   | 0 | 0.0      | 0.0      | 1.33e-06 | 2.24e-08 | 7.18e-07% |
| L1007     | False | koll11   | 6.27e-09 | 5.71e-07% | 0.0     | 1 | 0.0862   | 0.00956  | 0.016    | 1.2e-09  | 3.84e-08% |
| L1433     | False | ZB2      | 4.68e-09 | 4.26e-07% | 0.0     | 1 | 0.00559  | 0.0509   | 0.079    | 4e-09    | 1.28e-07% |
| L808      | False | OP3      | 3.19e-09 | 2.91e-07% | 0.0     | 1 | 0.0421   | 0.00375  | 0.00886  | 2.55e-09 | 8.18e-08% |
| L1498     | False | ZB2      | 2.72e-09 | 2.48e-07% | 0.0     | 1 | 0.000476 | 0.0291   | 0.0322   | 6.81e-09 | 2.18e-07% |
| L170      | False | OD1      | 2.36e-09 | 2.15e-07% | 0.0     | 1 | 0.0486   | 0.017    | 0.00919  | 2.13e-09 | 6.83e-08% |
| L468      | False | OP11-4   | 2.32e-09 | 2.11e-07% | 0.0     | 1 | 0.0293   | 0.00439  | 0.00327  | 1.6e-09  | 5.14e-08% |
| L953      | False | koll11   | 2.23e-09 | 2.03e-07% | 0.0     | 1 | 0.0216   | 0.0017   | 0.00119  | 1.39e-09 | 4.45e-08% |
| L319      | False | OD1      | 1.92e-09 | 1.75e-07% | 0.0     | 1 | 0.0199   | 0.00202  | 0.00134  | 9.7e-10  | 3.11e-08% |
| L1042     | False | koll11   | 1.62e-09 | 1.47e-07% | 0.0     | 1 | 0.0194   | 0.00252  | 0.00213  | 5.65e-10 | 1.81e-08% |
| L1682     | False | OD1      | 1.45e-09 | 1.32e-07% | 0.0     | 1 | 0.0171   | 0.00273  | 0.00139  | 6.39e-10 | 2.05e-08% |
| L1043     | False | koll11   | 1.36e-09 | 1.24e-07% | 0.0     | 1 | 0.0158   | 0.00182  | 0.00173  | 6.31e-10 | 2.02e-08% |
| L230      | False | ABY1     | 1.12e-09 | 1.02e-07% | 0.0     | 1 | 0.0134   | 0.00172  | 0.00155  | 9.75e-10 | 3.12e-08% |
| OTU_7230  | True  | ABY1     | 9.49e-10 | 8.64e-08% | 0.0     | 1 | 0.00914  | 0.00113  | 0.000286 | 8.79e-10 | 2.82e-08% |
| OTU_6022  | True  | OD1      | 7.61e-10 | 6.93e-08% | 0.0     | 1 | 0.00717  | 0.00092  | 0.000174 | 7.44e-10 | 2.38e-08% |
| L1421     | False | ZB2      | 5.92e-10 | 5.39e-08% | 0.0     | 1 | 0.000111 | 0.00392  | 0.00803  | 1.05e-09 | 3.38e-08% |
| L169      | False | OD1      | 5.77e-10 | 5.26e-08% | 0.0     | 1 | 0.0603   | 0.0406   | 0.0352   | 4.09e-09 | 1.31e-07% |
| L1280     | False | TM7-3    | 5.7e-10  | 5.19e-08% | 0.0     | 1 | 0.00461  | 0.000237 | 9.33e-05 | 1.03e-09 | 3.29e-08% |
| L249      | False | ABY1     | 5.3e-10  | 4.83e-08% | 0.0     | 1 | 0.00579  | 0.00139  | 0.000179 | 7.43e-10 | 2.38e-08% |
| L1124     | False | koll11   | 5.06e-10 | 4.61e-08% | 0.0     | 1 | 0.00504  | 0.000381 | 0.000441 | 7.17e-10 | 2.3e-08%  |
| L324      | False | ABY1     | 4.63e-10 | 4.22e-08% | 0.0     | 1 | 0.00387  | 0.000221 | 0.000112 | 4.55e-10 | 1.46e-08% |
| L1455     | False | ZB2      | 4.63e-10 | 4.21e-08% | 0.0     | 1 | 0.000856 | 0.00492  | 0.00924  | 8.72e-10 | 2.79e-08% |
| OTU_6693  | True  | ZB2      | 4.25e-10 | 3.87e-08% | 1.0     | 0 | 0.0      | 0.0      | 1.48e-07 | 1.14e-09 | 3.65e-08% |
| L1788     | False | OD1      | 3.62e-10 | 3.3e-08%  | 0.0     | 1 | 0.00405  | 0.000564 | 0.000357 | 2.97e-10 | 9.53e-09% |
| L763      | False | PBS-25   | 3.53e-10 | 3.21e-08% | 0.0     | 1 | 0.00248  | 6.58e-05 | 7.42e-08 | 8.3e-10  | 2.66e-08% |
| L682      | False | koll11   | 3.35e-10 | 3.05e-08% | 0.0     | 1 | 0.00584  | 0.00122  | 0.00149  | 5.2e-10  | 1.67e-08% |
| L1566     | False | ZB2      | 3.16e-10 | 2.87e-08% | 0.0     | 1 | 0.00432  | 0.000611 | 0.000841 | 4.16e-10 | 1.33e-08% |
| OTU_5548  | True  | OD1      | 3.13e-10 | 2.85e-08% | 0.0     | 1 | 0.0031   | 7.56e-05 | 0.000601 | 2.85e-10 | 9.12e-09% |
| L1300     | False | EW055    | 2.86e-10 | 2.6e-08%  | 0.0     | 1 | 0.00251  | 0.000236 | 6.28e-05 | 9.15e-10 | 2.93e-08% |
| L164      | False | ABY1     | 2.43e-10 | 2.21e-08% | 0.0     | 1 | 0.00208  | 0.000161 | 5.72e-05 | 2.77e-10 | 8.87e-09% |
| L884      | False | koll11   | 2.41e-10 | 2.2e-08%  | 0.0     | 1 | 0.00368  | 0.000713 | 0.000737 | 5.31e-10 | 1.7e-08%  |
| L1103     | False | koll11   | 2.32e-10 | 2.11e-08% | 0.0     | 1 | 0.00243  | 0.000114 | 0.000446 | 3.08e-10 | 9.86e-09% |
| OTU_7396  | True  | ABY1     | 2.29e-10 | 2.09e-08% | 0.0     | 1 | 0.00286  | 0.000753 | 0.000204 | 8.5e-10  | 2.72e-08% |
| L369      | False | Bacteria | 2.25e-10 | 2.05e-08% | 0.0     | 1 | 0.837    | 0.844    | 0.902    | 2.31e-09 | 7.39e-08% |
| L774      | False | PBS-25   | 2.14e-10 | 1.95e-08% | 0.0     | 1 | 0.00254  | 0.000273 | 0.000408 | 7.04e-10 | 2.25e-08% |
| L1729     | False | Mb-NB09  | 2.01e-10 | 1.83e-08% | 0.0     | 1 | 0.00307  | 0.000492 | 0.000769 | 5.05e-10 | 1.62e-08% |
| L922      | False | koll11   | 2e-10    | 1.82e-08% | 0.0     | 1 | 0.00132  | 4.42e-06 | 4.19e-06 | 3.23e-10 | 1.03e-08% |
| L1732     | False | Mb-NB09  | 1.72e-10 | 1.57e-08% | 0.0     | 1 | 0.0019   | 0.000421 | 8.9e-05  | 4.78e-10 | 1.53e-08% |
| L1633     | False | ZB2      | 1.45e-10 | 1.32e-08% | 0.0     | 1 | 0.00329  | 0.000809 | 0.00135  | 7.82e-10 | 2.51e-08% |
| L896      | False | koll11   | 1.38e-10 | 1.25e-08% | 0.0     | 1 | 0.00302  | 0.000611 | 0.00215  | 6.01e-10 | 1.92e-08% |
| L689      | False | koll11   | 1.37e-10 | 1.24e-08% | 0.0     | 1 | 0.00294  | 0.000616 | 0.00141  | 4.32e-10 | 1.38e-08% |
| OTU_4847  | True  | ZB2      | 1.32e-10 | 1.2e-08%  | 0.0     | 1 | 0.00101  | 6.21e-05 | 6.4e-06  | 1.77e-10 | 5.67e-09% |
| L384      | False | ABY1     | 1.25e-10 | 1.14e-08% | 0.0     | 1 | 0.000897 | 2.83e-05 | 5.3e-06  | 1.89e-10 | 6.06e-09% |

|           |       |          |          |           |     |   |          |          |          |          |           |
|-----------|-------|----------|----------|-----------|-----|---|----------|----------|----------|----------|-----------|
| L640      | False | PBS-25   | 1.14e-10 | 1.04e-08% | 0.0 | 1 | 0.000807 | 2.03e-05 | 5.37e-06 | 1.9e-10  | 6.08e-09% |
| L388      | False | ABY1     | 1.13e-10 | 1.03e-08% | 0.0 | 1 | 0.0134   | 0.00855  | 0.00966  | 1.49e-09 | 4.77e-08% |
| OTU_8209  | True  | ABY1     | 1.08e-10 | 9.87e-09% | 0.0 | 1 | 6.66e-05 | 0.00176  | 0.000615 | 3.52e-10 | 1.13e-08% |
| OTU_6407  | True  | ZB2      | 8.95e-11 | 8.16e-09% | 0.0 | 1 | 1.24e-05 | 0.00129  | 0.000642 | 1.29e-10 | 4.12e-09% |
| OTU_851   | True  | koll11   | 8.07e-11 | 7.35e-09% | 0.0 | 1 | 0.000899 | 0.000101 | 0.000116 | 2.08e-10 | 6.67e-09% |
| L795      | False | PBS-25   | 7.94e-11 | 7.23e-09% | 0.0 | 1 | 0.000615 | 4.38e-05 | 4.53e-06 | 1.08e-10 | 3.46e-09% |
| OTU_7956  | True  | OD1      | 7.71e-11 | 7.03e-09% | 0.0 | 1 | 0.000608 | 8.93e-05 | 0.00125  | 3.67e-10 | 1.18e-08% |
| OTU_876   | True  | koll11   | 7.07e-11 | 6.44e-09% | 0.0 | 1 | 0.000445 | 0.0      | 0.0      | 1.44e-10 | 4.62e-09% |
| L371      | False | ABY1     | 7.04e-11 | 6.41e-09% | 0.0 | 1 | 0.000793 | 0.000287 | 2.15e-05 | 2.15e-10 | 6.89e-09% |
| OTU_5946  | True  | OD1      | 6.41e-11 | 5.84e-09% | 0.0 | 1 | 0.000615 | 5.2e-05  | 5.06e-05 | 1.58e-10 | 5.05e-09% |
| L1751     | False | OD1      | 4.32e-11 | 3.94e-09% | 0.0 | 1 | 0.000842 | 0.000713 | 0.00196  | 5.98e-10 | 1.92e-08% |
| OTU_309   | True  | PBS-25   | 3.97e-11 | 3.62e-09% | 0.0 | 1 | 0.000558 | 7.49e-05 | 0.000152 | 1.5e-10  | 4.8e-09%  |
| OTU_6109  | True  | ZB2      | 3.7e-11  | 3.37e-09% | 0.0 | 1 | 4.83e-06 | 0.000515 | 0.000399 | 7.65e-11 | 2.45e-09% |
| OTU_5803  | True  | OD1      | 3.67e-11 | 3.34e-09% | 0.0 | 1 | 0.000319 | 1.78e-05 | 2.26e-05 | 1.21e-10 | 3.88e-09% |
| OTU_6715  | True  | ZB2      | 3.63e-11 | 3.3e-09%  | 0.0 | 1 | 0.000325 | 5.57e-05 | 4.2e-06  | 1.01e-10 | 3.22e-09% |
| OTU_6578  | True  | WCHB1-64 | 3.28e-11 | 2.99e-09% | 0.0 | 1 | 0.000131 | 8.03e-05 | 0.00059  | 1.77e-10 | 5.67e-09% |
| OTU_5805  | True  | OD1      | 3.22e-11 | 2.94e-09% | 0.0 | 1 | 0.000352 | 4.62e-05 | 3.93e-05 | 8.02e-11 | 2.57e-09% |
| OTU_7190  | True  | ABY1     | 3.18e-11 | 2.9e-09%  | 0.0 | 1 | 0.0      | 0.000415 | 0.000312 | 9.9e-11  | 3.17e-09% |
| OTU_411   | True  | koll11   | 3.12e-11 | 2.84e-09% | 0.0 | 1 | 0.000399 | 7.08e-05 | 6.07e-05 | 1.41e-10 | 4.5e-09%  |
| OTU_1017  | True  | PRR-12   | 2.39e-11 | 2.17e-09% | 0.0 | 1 | 0.000194 | 0.0      | 3.09e-05 | 9.02e-11 | 2.89e-09% |
| OTU_5244  | True  | OD1      | 2.36e-11 | 2.15e-09% | 0.0 | 1 | 0.000259 | 7.48e-05 | 1.05e-05 | 1.05e-10 | 3.38e-09% |
| OTU_6594  | True  | ZB2      | 2e-11    | 1.82e-09% | 0.0 | 1 | 0.000169 | 3.11e-05 | 0.0      | 7.03e-11 | 2.25e-09% |
| OTU_9186  | True  | Mb-NB09  | 6.91e-12 | 6.29e-10% | 0.0 | 1 | 0.000152 | 0.000127 | 3.12e-05 | 6.99e-11 | 2.24e-09% |
| L1295     | False | TM7-3    | 6.84e-13 | 6.23e-11% | 0.0 | 1 | 4.01e-06 | 0.0      | 0.0      | 1.45e-12 | 4.65e-11% |
| OTU_144   | True  | Archaea  | 0.0      | 0.0%      | 1.0 | 0 | 0.0      | 0.0      | 0.0      | 0.0      | 0.0%      |
| OTU_11097 | True  | Archaea  | 0.0      | 0.0%      | 1.0 | 0 | 0.0      | 0.0      | 0.0      | 0.0      | 0.0%      |
| OTU_10991 | True  | Archaea  | 0.0      | 0.0%      | 1.0 | 0 | 0.0      | 0.0      | 0.0      | 0.0      | 0.0%      |
| OTU_13    | True  | Archaea  | 0.0      | 0.0%      | 1.0 | 0 | 0.0      | 0.0      | 0.0      | 0.0      | 0.0%      |
| L1977     | False | Archaea  | 0.0      | 0.0%      | 1.0 | 0 | 0.0      | 0.0      | 0.0      | 0.0      | 0.0%      |
| OTU_11044 | True  | Archaea  | 0.0      | 0.0%      | 1.0 | 0 | 0.0      | 0.0      | 0.0      | 0.0      | 0.0%      |
| OTU_11020 | True  | Archaea  | 0.0      | 0.0%      | 1.0 | 0 | 0.0      | 0.0      | 0.0      | 0.0      | 0.0%      |
| L1975     | False | Archaea  | 0.0      | 0.0%      | 1.0 | 0 | 0.0      | 0.0      | 0.0      | 0.0      | 0.0%      |
| L1953     | False | Archaea  | 0.0      | 0.0%      | 1.0 | 0 | 0.0      | 0.0      | 0.0      | 0.0      | 0.0%      |
| OTU_3999  | True  | Archaea  | 0.0      | 0.0%      | 1.0 | 0 | 0.0      | 0.0      | 0.0      | 0.0      | 0.0%      |
| L1955     | False | Archaea  | 0.0      | 0.0%      | 1.0 | 0 | 0.0      | 0.0      | 0.0      | 0.0      | 0.0%      |
| OTU_102   | True  | Archaea  | 0.0      | 0.0%      | 1.0 | 0 | 0.0      | 0.0      | 0.0      | 0.0      | 0.0%      |
| OTU_112   | True  | Archaea  | 0.0      | 0.0%      | 1.0 | 0 | 0.0      | 0.0      | 0.0      | 0.0      | 0.0%      |
| OTU_11341 | True  | Archaea  | 0.0      | 0.0%      | 1.0 | 0 | 0.0      | 0.0      | 0.0      | 0.0      | 0.0%      |
| L1959     | False | Archaea  | 0.0      | 0.0%      | 1.0 | 0 | 0.0      | 0.0      | 0.0      | 0.0      | 0.0%      |
| L1960     | False | Archaea  | 0.0      | 0.0%      | 1.0 | 0 | 0.0      | 0.0      | 0.0      | 0.0      | 0.0%      |
| OTU_11266 | True  | Archaea  | 0.0      | 0.0%      | 1.0 | 0 | 0.0      | 0.0      | 0.0      | 0.0      | 0.0%      |
| L1962     | False | Archaea  | 0.0      | 0.0%      | 1.0 | 0 | 0.0      | 0.0      | 0.0      | 0.0      | 0.0%      |
| OTU_10884 | True  | Archaea  | 0.0      | 0.0%      | 1.0 | 0 | 0.0      | 0.0      | 0.0      | 0.0      | 0.0%      |
| OTU_11207 | True  | Archaea  | 0.0      | 0.0%      | 1.0 | 0 | 0.0      | 0.0      | 0.0      | 0.0      | 0.0%      |
| L1965     | False | Archaea  | 0.0      | 0.0%      | 1.0 | 0 | 0.0      | 0.0      | 0.0      | 0.0      | 0.0%      |
| OTU_11297 | True  | Archaea  | 0.0      | 0.0%      | 1.0 | 0 | 0.0      | 0.0      | 0.0      | 0.0      | 0.0%      |
| OTU_11306 | True  | Archaea  | 0.0      | 0.0%      | 1.0 | 0 | 0.0      | 0.0      | 0.0      | 0.0      | 0.0%      |
| L1968     | False | Archaea  | 0.0      | 0.0%      | 1.0 | 0 | 0.0      | 0.0      | 0.0      | 0.0      | 0.0%      |
| OTU_10977 | True  | Archaea  | 0.0      | 0.0%      | 1.0 | 0 | 0.0      | 0.0      | 0.0      | 0.0      | 0.0%      |
| L1969     | False | Archaea  | 0.0      | 0.0%      | 1.0 | 0 | 0.0      | 0.0      | 0.0      | 0.0      | 0.0%      |
| OTU_11073 | True  | Archaea  | 0.0      | 0.0%      | 1.0 | 0 | 0.0      | 0.0      | 0.0      | 0.0      | 0.0%      |
| L1951     | False | Archaea  | 0.0      | 0.0%      | 1.0 | 0 | 0.0      | 0.0      | 0.0      | 0.0      | 0.0%      |
| L1972     | False | Archaea  | 0.0      | 0.0%      | 1.0 | 0 | 0.0      | 0.0      | 0.0      | 0.0      | 0.0%      |
| L1973     | False | Archaea  | 0.0      | 0.0%      | 1.0 | 0 | 0.0      | 0.0      | 0.0      | 0.0      | 0.0%      |
| L1974     | False | Archaea  | 0.0      | 0.0%      | 1.0 | 0 | 0.0      | 0.0      | 0.0      | 0.0      | 0.0%      |
| L1981     | False | Archaea  | 0.0      | 0.0%      | 1.0 | 0 | 0.0      | 0.0      | 0.0      | 0.0      | 0.0%      |
| L2008     | False | Archaea  | 0.0      | 0.0%      | 1.0 | 0 | 0.0      | 0.0      | 0.0      | 0.0      | 0.0%      |
| L1983     | False | Archaea  | 0.0      | 0.0%      | 1.0 | 0 | 0.0      | 0.0      | 0.0      | 0.0      | 0.0%      |
| L1984     | False | Archaea  | 0.0      | 0.0%      | 1.0 | 0 | 0.0      | 0.0      | 0.0      | 0.0      | 0.0%      |
| L1987     | False | Archaea  | 0.0      | 0.0%      | 1.0 | 0 | 0.0      | 0.0      | 0.0      | 0.0      | 0.0%      |
| L1988     | False | Archaea  | 0.0      | 0.0%      | 1.0 | 0 | 0.0      | 0.0      | 0.0      | 0.0      | 0.0%      |
| OTU_10976 | True  | Archaea  | 0.0      | 0.0%      | 1.0 | 0 | 0.0      | 0.0      | 0.0      | 0.0      | 0.0%      |
| OTU_10957 | True  | Archaea  | 0.0      | 0.0%      | 1.0 | 0 | 0.0      | 0.0      | 0.0      | 0.0      | 0.0%      |
| OTU_11000 | True  | Archaea  | 0.0      | 0.0%      | 1.0 | 0 | 0.0      | 0.0      | 0.0      | 0.0      | 0.0%      |
| L1992     | False | Archaea  | 0.0      | 0.0%      | 1.0 | 0 | 0.0      | 0.0      | 0.0      | 0.0      | 0.0%      |

|           |       |         |     |      |     |   |     |     |     |     |      |
|-----------|-------|---------|-----|------|-----|---|-----|-----|-----|-----|------|
| L1993     | False | Archaea | 0.0 | 0.0% | 1.0 | 0 | 0.0 | 0.0 | 0.0 | 0.0 | 0.0% |
| OTU_11180 | True  | Archaea | 0.0 | 0.0% | 1.0 | 0 | 0.0 | 0.0 | 0.0 | 0.0 | 0.0% |
| L1995     | False | Archaea | 0.0 | 0.0% | 1.0 | 0 | 0.0 | 0.0 | 0.0 | 0.0 | 0.0% |
| L1996     | False | Archaea | 0.0 | 0.0% | 1.0 | 0 | 0.0 | 0.0 | 0.0 | 0.0 | 0.0% |
| OTU_17    | True  | Archaea | 0.0 | 0.0% | 1.0 | 0 | 0.0 | 0.0 | 0.0 | 0.0 | 0.0% |
| L1998     | False | Archaea | 0.0 | 0.0% | 1.0 | 0 | 0.0 | 0.0 | 0.0 | 0.0 | 0.0% |
| OTU_11336 | True  | Archaea | 0.0 | 0.0% | 1.0 | 0 | 0.0 | 0.0 | 0.0 | 0.0 | 0.0% |
| L2000     | False | Archaea | 0.0 | 0.0% | 1.0 | 0 | 0.0 | 0.0 | 0.0 | 0.0 | 0.0% |
| OTU_22    | True  | Archaea | 0.0 | 0.0% | 1.0 | 0 | 0.0 | 0.0 | 0.0 | 0.0 | 0.0% |
| L2002     | False | Archaea | 0.0 | 0.0% | 1.0 | 0 | 0.0 | 0.0 | 0.0 | 0.0 | 0.0% |
| OTU_11284 | True  | Archaea | 0.0 | 0.0% | 1.0 | 0 | 0.0 | 0.0 | 0.0 | 0.0 | 0.0% |
| L1949     | False | Archaea | 0.0 | 0.0% | 1.0 | 0 | 0.0 | 0.0 | 0.0 | 0.0 | 0.0% |
| L2004     | False | Archaea | 0.0 | 0.0% | 1.0 | 0 | 0.0 | 0.0 | 0.0 | 0.0 | 0.0% |
| OTU_11308 | True  | Archaea | 0.0 | 0.0% | 1.0 | 0 | 0.0 | 0.0 | 0.0 | 0.0 | 0.0% |
| OTU_10936 | True  | Archaea | 0.0 | 0.0% | 1.0 | 0 | 0.0 | 0.0 | 0.0 | 0.0 | 0.0% |
| OTU_11271 | True  | Archaea | 0.0 | 0.0% | 1.0 | 0 | 0.0 | 0.0 | 0.0 | 0.0 | 0.0% |
| OTU_11285 | True  | Archaea | 0.0 | 0.0% | 1.0 | 0 | 0.0 | 0.0 | 0.0 | 0.0 | 0.0% |
| OTU_10959 | True  | Archaea | 0.0 | 0.0% | 1.0 | 0 | 0.0 | 0.0 | 0.0 | 0.0 | 0.0% |
| L2010     | False | Archaea | 0.0 | 0.0% | 1.0 | 0 | 0.0 | 0.0 | 0.0 | 0.0 | 0.0% |
| OTU_20    | True  | Archaea | 0.0 | 0.0% | 1.0 | 0 | 0.0 | 0.0 | 0.0 | 0.0 | 0.0% |
| L2012     | False | Archaea | 0.0 | 0.0% | 1.0 | 0 | 0.0 | 0.0 | 0.0 | 0.0 | 0.0% |
| OTU_21    | True  | Archaea | 0.0 | 0.0% | 1.0 | 0 | 0.0 | 0.0 | 0.0 | 0.0 | 0.0% |
| OTU_10954 | True  | Archaea | 0.0 | 0.0% | 1.0 | 0 | 0.0 | 0.0 | 0.0 | 0.0 | 0.0% |
| L1950     | False | Archaea | 0.0 | 0.0% | 1.0 | 0 | 0.0 | 0.0 | 0.0 | 0.0 | 0.0% |
| OTU_11312 | True  | Archaea | 0.0 | 0.0% | 1.0 | 0 | 0.0 | 0.0 | 0.0 | 0.0 | 0.0% |
| OTU_11287 | True  | Archaea | 0.0 | 0.0% | 1.0 | 0 | 0.0 | 0.0 | 0.0 | 0.0 | 0.0% |
| OTU_9114  | True  | TM7-1   | 0.0 | 0.0% | 1.0 | 0 | 0.0 | 0.0 | 0.0 | 0.0 | 0.0% |
| OTU_11281 | True  | Archaea | 0.0 | 0.0% | 1.0 | 0 | 0.0 | 0.0 | 0.0 | 0.0 | 0.0% |
| L1914     | False | Archaea | 0.0 | 0.0% | 1.0 | 0 | 0.0 | 0.0 | 0.0 | 0.0 | 0.0% |
| L1913     | False | Archaea | 0.0 | 0.0% | 1.0 | 0 | 0.0 | 0.0 | 0.0 | 0.0 | 0.0% |
| L1912     | False | Archaea | 0.0 | 0.0% | 1.0 | 0 | 0.0 | 0.0 | 0.0 | 0.0 | 0.0% |
| OTU_5846  | True  | OD1     | 0.0 | 0.0% | 1.0 | 0 | 0.0 | 0.0 | 0.0 | 0.0 | 0.0% |
| OTU_8168  | True  | ZB2     | 0.0 | 0.0% | 1.0 | 0 | 0.0 | 0.0 | 0.0 | 0.0 | 0.0% |
| OTU_6694  | True  | ZB2     | 0.0 | 0.0% | 1.0 | 0 | 0.0 | 0.0 | 0.0 | 0.0 | 0.0% |
| OTU_7192  | True  | ZB2     | 0.0 | 0.0% | 1.0 | 0 | 0.0 | 0.0 | 0.0 | 0.0 | 0.0% |
| OTU_5341  | True  | OD1     | 0.0 | 0.0% | 1.0 | 0 | 0.0 | 0.0 | 0.0 | 0.0 | 0.0% |
| OTU_8196  | True  | TM7-3   | 0.0 | 0.0% | 1.0 | 0 | 0.0 | 0.0 | 0.0 | 0.0 | 0.0% |
| OTU_8171  | True  | TM7-3   | 0.0 | 0.0% | 1.0 | 0 | 0.0 | 0.0 | 0.0 | 0.0 | 0.0% |
| OTU_8182  | True  | EW055   | 0.0 | 0.0% | 1.0 | 0 | 0.0 | 0.0 | 0.0 | 0.0 | 0.0% |
| OTU_8180  | True  | EW055   | 0.0 | 0.0% | 1.0 | 0 | 0.0 | 0.0 | 0.0 | 0.0 | 0.0% |
| OTU_9113  | True  | TM7-1   | 0.0 | 0.0% | 1.0 | 0 | 0.0 | 0.0 | 0.0 | 0.0 | 0.0% |
| OTU_11012 | True  | Archaea | 0.0 | 0.0% | 1.0 | 0 | 0.0 | 0.0 | 0.0 | 0.0 | 0.0% |
| L1269     | False | TM7-1   | 0.0 | 0.0% | 1.0 | 0 | 0.0 | 0.0 | 0.0 | 0.0 | 0.0% |
| OTU_8178  | True  | TM7-1   | 0.0 | 0.0% | 1.0 | 0 | 0.0 | 0.0 | 0.0 | 0.0 | 0.0% |
| OTU_9149  | True  | TM7-1   | 0.0 | 0.0% | 1.0 | 0 | 0.0 | 0.0 | 0.0 | 0.0 | 0.0% |
| OTU_470   | True  | koll11  | 0.0 | 0.0% | 1.0 | 0 | 0.0 | 0.0 | 0.0 | 0.0 | 0.0% |
| OTU_472   | True  | koll11  | 0.0 | 0.0% | 1.0 | 0 | 0.0 | 0.0 | 0.0 | 0.0 | 0.0% |
| OTU_4223  | True  | koll11  | 0.0 | 0.0% | 1.0 | 0 | 0.0 | 0.0 | 0.0 | 0.0 | 0.0% |
| OTU_1354  | True  | PBS-25  | 0.0 | 0.0% | 1.0 | 0 | 0.0 | 0.0 | 0.0 | 0.0 | 0.0% |
| OTU_477   | True  | PRR-12  | 0.0 | 0.0% | 1.0 | 0 | 0.0 | 0.0 | 0.0 | 0.0 | 0.0% |
| OTU_3027  | True  | SJA-4   | 0.0 | 0.0% | 1.0 | 0 | 0.0 | 0.0 | 0.0 | 0.0 | 0.0% |
| OTU_10777 | True  | OP11-3  | 0.0 | 0.0% | 1.0 | 0 | 0.0 | 0.0 | 0.0 | 0.0 | 0.0% |
| OTU_10819 | True  | OP11-4  | 0.0 | 0.0% | 1.0 | 0 | 0.0 | 0.0 | 0.0 | 0.0 | 0.0% |
| OTU_5181  | True  | BB36    | 0.0 | 0.0% | 1.0 | 0 | 0.0 | 0.0 | 0.0 | 0.0 | 0.0% |
| OTU_9137  | True  | ABY1    | 0.0 | 0.0% | 1.0 | 0 | 0.0 | 0.0 | 0.0 | 0.0 | 0.0% |
| OTU_11188 | True  | Archaea | 0.0 | 0.0% | 1.0 | 0 | 0.0 | 0.0 | 0.0 | 0.0 | 0.0% |
| L1915     | False | Archaea | 0.0 | 0.0% | 1.0 | 0 | 0.0 | 0.0 | 0.0 | 0.0 | 0.0% |
| L1918     | False | Archaea | 0.0 | 0.0% | 1.0 | 0 | 0.0 | 0.0 | 0.0 | 0.0 | 0.0% |
| OTU_11167 | True  | Archaea | 0.0 | 0.0% | 1.0 | 0 | 0.0 | 0.0 | 0.0 | 0.0 | 0.0% |
| L1946     | False | Archaea | 0.0 | 0.0% | 1.0 | 0 | 0.0 | 0.0 | 0.0 | 0.0 | 0.0% |
| L1945     | False | Archaea | 0.0 | 0.0% | 1.0 | 0 | 0.0 | 0.0 | 0.0 | 0.0 | 0.0% |
| OTU_10979 | True  | Archaea | 0.0 | 0.0% | 1.0 | 0 | 0.0 | 0.0 | 0.0 | 0.0 | 0.0% |
| OTU_11015 | True  | Archaea | 0.0 | 0.0% | 1.0 | 0 | 0.0 | 0.0 | 0.0 | 0.0 | 0.0% |
| OTU_11153 | True  | Archaea | 0.0 | 0.0% | 1.0 | 0 | 0.0 | 0.0 | 0.0 | 0.0 | 0.0% |
| L1941     | False | Archaea | 0.0 | 0.0% | 1.0 | 0 | 0.0 | 0.0 | 0.0 | 0.0 | 0.0% |

|           |       |          |                    |                     |       |   |          |          |          |          |           |
|-----------|-------|----------|--------------------|---------------------|-------|---|----------|----------|----------|----------|-----------|
| L1940     | False | Archaea  | 0.0                | 0.0%                | 1.0   | 0 | 0.0      | 0.0      | 0.0      | 0.0      | 0.0%      |
| OTU_10982 | True  | Archaea  | 0.0                | 0.0%                | 1.0   | 0 | 0.0      | 0.0      | 0.0      | 0.0      | 0.0%      |
| L1938     | False | Archaea  | 0.0                | 0.0%                | 1.0   | 0 | 0.0      | 0.0      | 0.0      | 0.0      | 0.0%      |
| OTU_10944 | True  | Archaea  | 0.0                | 0.0%                | 1.0   | 0 | 0.0      | 0.0      | 0.0      | 0.0      | 0.0%      |
| OTU_10946 | True  | Archaea  | 0.0                | 0.0%                | 1.0   | 0 | 0.0      | 0.0      | 0.0      | 0.0      | 0.0%      |
| L1935     | False | Archaea  | 0.0                | 0.0%                | 1.0   | 0 | 0.0      | 0.0      | 0.0      | 0.0      | 0.0%      |
| L1919     | False | Archaea  | 0.0                | 0.0%                | 1.0   | 0 | 0.0      | 0.0      | 0.0      | 0.0      | 0.0%      |
| OTU_11121 | True  | Archaea  | 0.0                | 0.0%                | 1.0   | 0 | 0.0      | 0.0      | 0.0      | 0.0      | 0.0%      |
| L1932     | False | Archaea  | 0.0                | 0.0%                | 1.0   | 0 | 0.0      | 0.0      | 0.0      | 0.0      | 0.0%      |
| OTU_11194 | True  | Archaea  | 0.0                | 0.0%                | 1.0   | 0 | 0.0      | 0.0      | 0.0      | 0.0      | 0.0%      |
| OTU_10967 | True  | Archaea  | 0.0                | 0.0%                | 1.0   | 0 | 0.0      | 0.0      | 0.0      | 0.0      | 0.0%      |
| L1921     | False | Archaea  | 0.0                | 0.0%                | 1.0   | 0 | 0.0      | 0.0      | 0.0      | 0.0      | 0.0%      |
| L1922     | False | Archaea  | 0.0                | 0.0%                | 1.0   | 0 | 0.0      | 0.0      | 0.0      | 0.0      | 0.0%      |
| L1923     | False | Archaea  | 0.0                | 0.0%                | 1.0   | 0 | 0.0      | 0.0      | 0.0      | 0.0      | 0.0%      |
| OTU_10973 | True  | Archaea  | 0.0                | 0.0%                | 1.0   | 0 | 0.0      | 0.0      | 0.0      | 0.0      | 0.0%      |
| L1925     | False | Archaea  | 0.0                | 0.0%                | 1.0   | 0 | 0.0      | 0.0      | 0.0      | 0.0      | 0.0%      |
| L1926     | False | Archaea  | 0.0                | 0.0%                | 1.0   | 0 | 0.0      | 0.0      | 0.0      | 0.0      | 0.0%      |
| OTU_11120 | True  | Archaea  | 0.0                | 0.0%                | 1.0   | 0 | 0.0      | 0.0      | 0.0      | 0.0      | 0.0%      |
| OTU_10942 | True  | Archaea  | 0.0                | 0.0%                | 1.0   | 0 | 0.0      | 0.0      | 0.0      | 0.0      | 0.0%      |
| OTU_11276 | True  | Archaea  | 0.0                | 0.0%                | 1.0   | 0 | 0.0      | 0.0      | 0.0      | 0.0      | 0.0%      |
| L1930     | False | Archaea  | 0.0                | 0.0%                | 1.0   | 0 | 0.0      | 0.0      | 0.0      | 0.0      | 0.0%      |
| L1        | False | Bacteria | -2.60311691088e-17 | -2.37130878137e-15% | 0.993 | 0 | 1.0      | 1.0      | 1.0      | 6.47e-17 | 2.07e-15% |
| L0        | False | Bacteria | -5.66747234479e-17 | -5.16278269457e-15% | 0.993 | 0 | 1.0      | 1.0      | 1.0      | 1.41e-16 | 4.51e-15% |
| OTU_458   | True  | koll11   | -5.6197248056e-10  | -5.11928708417e-08% | 1.0   | 0 | 3.22e-05 | 3.43e-05 | 4.33e-05 | 8.18e-07 | 2.62e-05% |
| L1478     | False | ZB2      | -1.15250869287e-08 | -1.04987754204e-06% | 1.0   | 0 | 0.000313 | 0.000492 | 0.000384 | 1.11e-05 | 0.000357% |
| L1237     | False | TM7      | -2.28331450697e-07 | -2.07998485139e-05% | 1.0   | 0 | 0.0105   | 0.0121   | 0.0102   | 0.000256 | 0.00821%  |

**phyloh\_output\_all\_sample**

# Partitioning information in /home/anna/Scrivania/openw/progetto\_acqua/16S\_merge\_work/phyloH.raxml

## Table of Contents

### The run call was:

```

esecutorePhyloHPandas.py -s /home/anna/Scrivania/openw/progetto_acqua/16S_merge_work/phyloH.raxml/raxml.nano01.01.sample.txt -t
/home/anna/Scrivania/openw/progetto_acqua/16S_merge_work/phyloH.raxml/nanoarchea_taxa_mod.txt -f
/home/anna/Scrivania/openw/progetto_acqua/16S_merge_work/phyloH.raxml/nanoarchea.lb.rm.reroot_newick.txt -g
/home/anna/Scrivania/openw/progetto_acqua/16S_merge_work/phyloH.raxml/map_h2o_M.txt -r 999 -h 1 -q 1 -e 1 -k 1 -o
/home/anna/Scrivania/openw/progetto_acqua/16S_merge_work/phyloH.raxml/nano_arche.lb.rm.all.paper999taxamode1k1

```

### Experimental Design:

Counts of observations across groups and samples within groups

| Total Counts | Group Name | Group Counts | Sample Name | Sample Counts |         |        |
|--------------|------------|--------------|-------------|---------------|---------|--------|
| 4267536      | Aquifer    | 542957       | 10A.r.s     | 2381          |         |        |
|              |            |              | 10A.s       | 62411         |         |        |
|              |            |              | 11A.r.s     | 151853        |         |        |
|              |            |              | 11A.s       | 101531        |         |        |
|              |            |              | 12A.r.s     | 20449         |         |        |
|              |            |              | 12A.s       | 56553         |         |        |
|              |            |              | 13A.r.s     | 14488         |         |        |
|              |            |              | 13A.s       | 20192         |         |        |
|              |            |              | 14A.r.s     | 43550         |         |        |
|              |            |              | 14A.s       | 39416         |         |        |
|              |            |              | 1A.cr.r.s   | 33918         |         |        |
|              |            |              | 1A.cr.s     | 88003         |         |        |
|              |            |              | 2A.cr.r.s   | 14254         |         |        |
|              |            |              | 2A.cr.s     | 11758         |         |        |
|              |            |              | 3A.r.s      | 8572          |         |        |
|              |            |              | 3A.s        | 14119         |         |        |
|              |            |              | 4A.r.s      | 4789          |         |        |
|              |            |              | 4A.s        | 14021         |         |        |
|              |            |              | 5A.r.s      | 13944         |         |        |
|              |            |              | 5A.s        | 228900        |         |        |
|              |            |              | 6A.r.s      | 46101         |         |        |
|              |            |              | 6A.s        | 9801          |         |        |
|              |            |              | 7A.r.s      | 85755         |         |        |
|              |            |              | 7A.s        | 8683          |         |        |
|              |            |              | 8A.r.s      | 12083         |         |        |
|              |            |              | 8A.s        | 2412          |         |        |
|              |            |              | 9A.r.s      | 10728         |         |        |
|              |            |              | 9A.s        | 17584         |         |        |
|              |            |              | Cfilters    | 2032592       | 10B.r.s | 102777 |
|              |            |              |             |               | 10B.s   | 2654   |
|              |            |              |             |               | 11B.r.s | 2580   |
|              |            |              |             |               | 11B.s   | 1795   |
|              |            |              |             |               | 12B.r.s | 87148  |
|              |            |              |             |               | 12B.s   | 8342   |
| 13B.r.s      | 9825       |              |             |               |         |        |
| 13B.s        | 5704       |              |             |               |         |        |
| 14B.r.s      | 2552       |              |             |               |         |        |
| 14B.s        | 18927      |              |             |               |         |        |
| 1B.cr.r.s    | 612596     |              |             |               |         |        |
| 1B.cr.s      | 212195     |              |             |               |         |        |
| 2B.cr.r.s    | 1207       |              |             |               |         |        |
| 2B.cr.s      | 5133       |              |             |               |         |        |
| 3B.r.s       | 12796      |              |             |               |         |        |
| 3B.s         | 196761     |              |             |               |         |        |
| 4B.r.s       | 58469      |              |             |               |         |        |
| 4B.s         | 63137      |              |             |               |         |        |
| 5B.r.s       | 14924      |              |             |               |         |        |



|  |              |                |                  |               |
|--|--------------|----------------|------------------|---------------|
|  |              |                | <b>5B.s</b>      | <b>7225</b>   |
|  |              |                | <b>6B.r.s</b>    | <b>12747</b>  |
|  |              |                | <b>6B.s</b>      | <b>1106</b>   |
|  |              |                | <b>7B.r.s</b>    | <b>50607</b>  |
|  |              |                | <b>7B.s</b>      | <b>34101</b>  |
|  |              |                | <b>8B.r.s</b>    | <b>22187</b>  |
|  |              |                | <b>8B.s</b>      | <b>283518</b> |
|  |              |                | <b>9B.r.s</b>    | <b>22565</b>  |
|  |              |                | <b>9B.s</b>      | <b>3972</b>   |
|  | <b>Chlor</b> | <b>1691987</b> | <b>10C.r.s</b>   | <b>27577</b>  |
|  |              |                | <b>10C.s</b>     | <b>7622</b>   |
|  |              |                | <b>11C.r.s</b>   | <b>4444</b>   |
|  |              |                | <b>11C.s</b>     | <b>19608</b>  |
|  |              |                | <b>12C.r.s</b>   | <b>202073</b> |
|  |              |                | <b>12C.s</b>     | <b>7657</b>   |
|  |              |                | <b>13C.r.s</b>   | <b>64882</b>  |
|  |              |                | <b>13C.s</b>     | <b>80259</b>  |
|  |              |                | <b>14C.r.s</b>   | <b>18105</b>  |
|  |              |                | <b>14C.s</b>     | <b>10395</b>  |
|  |              |                | <b>1C.cr.r.s</b> | <b>1790</b>   |
|  |              |                | <b>1C.er.s</b>   | <b>27784</b>  |
|  |              |                | <b>2C.cr.r.s</b> | <b>21877</b>  |
|  |              |                | <b>2C.er.s</b>   | <b>84514</b>  |
|  |              |                | <b>3C.r.s</b>    | <b>48275</b>  |
|  |              |                | <b>3C.s</b>      | <b>6724</b>   |
|  |              |                | <b>4C.r.s</b>    | <b>53103</b>  |
|  |              |                | <b>4C.s</b>      | <b>5600</b>   |
|  |              |                | <b>5C.r.s</b>    | <b>3430</b>   |
|  |              |                | <b>5C.s</b>      | <b>251395</b> |
|  |              |                | <b>6C.r.s</b>    | <b>100190</b> |
|  |              |                | <b>6C.s</b>      | <b>21846</b>  |
|  |              |                | <b>7C.r.s</b>    | <b>25605</b>  |
|  |              |                | <b>7C.s</b>      | <b>8852</b>   |
|  |              |                | <b>8C.r.s</b>    | <b>51516</b>  |
|  |              |                | <b>8C.s</b>      | <b>20891</b>  |
|  |              |                | <b>9C.r.s</b>    | <b>73243</b>  |
|  |              |                | <b>9C.s</b>      | <b>22480</b>  |

## Entropy across samples, groups and samples within groups

MaxDiversity gives the values for a maximally balanced experimental design

|               | nats | Diversity | MaxDiversity |
|---------------|------|-----------|--------------|
| <b>H(G)</b>   | 1.1  | 3.0       | 3.0          |
| <b>H(S)</b>   | 4.43 | 84.0      | 84.0         |
| <b>H(S G)</b> | 3.33 | 28.0      | 28.0         |

## Gamma diversities:

Total entropy and diversity within each group and overall data

Unit measure for Diversity is equivalent number of independent equi-abundant lineages

|                 | nats  | Diversity |
|-----------------|-------|-----------|
| <b>Group</b>    |       |           |
| <b>Aquifer</b>  | 0.783 | 2.19      |
| <b>Cfilters</b> | 0.501 | 1.65      |
| <b>Chlor</b>    | 0.472 | 1.6       |
| <b>Overall</b>  | 0.682 | 1.98      |

## Alpha diversities:

Mean entropy and diversity within sample or group

Unit measure for Diversity is equivalent number of independent equi-abundant lineages

|               | nats  | Diversity |
|---------------|-------|-----------|
| <b>H(T S)</b> | 0.482 | 1.62      |

|               |       |     |
|---------------|-------|-----|
| <b>H(T G)</b> | 0.585 | 1.8 |
|---------------|-------|-----|

## Beta diversity:

Information shared across Tree and Sample or Group vector expressed as nats and turnover of linneage.

Turnover is the percentage of observations not shared across groups

Pvalue is computed with Permutation procedure

|                 | nats   | TurnOver | pvalue |
|-----------------|--------|----------|--------|
| <b>I(T,G)</b>   | 0.0971 | 8.84%    | 0.0    |
| <b>I(T,S G)</b> | 0.104  | 3.11%    | 0.0    |

## Difference of each group from total:

phylogenetic Kullback-Leiber distance between each group and the overall data

|                 | KullBack-Lieber(PG(i)  Ptot(i)) |
|-----------------|---------------------------------|
| <b>Group</b>    |                                 |
| <b>Aquifer</b>  | 0.19                            |
| <b>Cfilters</b> | 0.0397                          |
| <b>Chlor</b>    | 0.0526                          |

## Pairwise TurnOver between groups

|                 | Aquifer | Cfilters | Chlor |
|-----------------|---------|----------|-------|
| <b>Aquifer</b>  |         |          |       |
| <b>Cfilters</b> | 13.9%   |          |       |
| <b>Chlor</b>    | 13.6%   | 0.804%   |       |

## Per Node Statistics mapped on the phylogeny

Three types of data are shown on the tree:

1. The color of the branches cyan indicates a contribution to I(T,E) higher than the null distribution, while branches are black otherwise.
2. The background of each branch is a gradient from yellow to red for increased contribution to I(T,E). For details look at the legend on the side
3. Bar plot on each tips indicates the relative frequencies in each group

Look at the tree find an relevant branches and text search the label of the branch to access the correct row on the by node statistics table.

Go itol using the link to modify the tree, or use the itol table and the labelled tree to add further data set (i.e. taxonomic name)

[Click here to modify image](#)

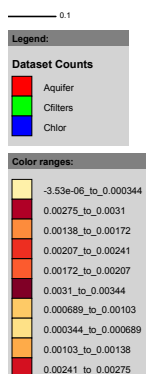

## Per Node Statistics in tabular format:

|          |         | Metric   | I(Ti,G)  |         |          |        | By Group Relative Frequency |         |          | I(Ti,S G) |          |
|----------|---------|----------|----------|---------|----------|--------|-----------------------------|---------|----------|-----------|----------|
|          |         |          | Stat     | nats    | TurnOver | pvalue | MultTest                    | Aquifer | Cfilters | Chlor     | nats     |
| Name     | Is_Leaf | Taxonomy |          |         |          |        |                             |         |          |           |          |
| L575     | False   | Bacteria | 0.00378  | 0.344%  | 0.0      | 1      | 0.536                       | 0.0814  | 0.0991   | 0.00129   | 0.0386%  |
| L526     | False   | Bacteria | 0.0032   | 0.291%  | 0.0      | 1      | 0.543                       | 0.085   | 0.102    | 0.00115   | 0.0346%  |
| L420     | False   | Bacteria | 0.00309  | 0.282%  | 0.0      | 1      | 0.613                       | 0.109   | 0.16     | 0.00202   | 0.0607%  |
| OTU_6998 | True    | ZB2      | 0.00291  | 0.265%  | 0.0      | 1      | 0.000611                    | 0.0393  | 0.152    | 0.00323   | 0.0968%  |
| L1372    | False   | OD1      | 0.00279  | 0.254%  | 0.0      | 1      | 0.0413                      | 0.637   | 0.576    | 0.00127   | 0.0381%  |
| L1326    | False   | OD1      | 0.00269  | 0.245%  | 0.0      | 1      | 0.0861                      | 0.701   | 0.742    | 0.000939  | 0.0282%  |
| L422     | False   | Bacteria | 0.00253  | 0.23%   | 0.0      | 1      | 0.582                       | 0.0957  | 0.11     | 0.000919  | 0.0276%  |
| L1379    | False   | ZB2      | 0.0024   | 0.219%  | 0.0      | 1      | 0.0156                      | 0.564   | 0.479    | 0.00144   | 0.0432%  |
| L1375    | False   | OD1      | 0.00237  | 0.216%  | 0.0      | 1      | 0.0166                      | 0.564   | 0.479    | 0.00144   | 0.0432%  |
| L1324    | False   | OD1      | 0.00236  | 0.214%  | 0.0      | 1      | 0.126                       | 0.711   | 0.746    | 0.00091   | 0.0273%  |
| L1331    | False   | OD1      | 0.00232  | 0.212%  | 0.0      | 1      | 0.085                       | 0.701   | 0.742    | 0.000804  | 0.0241%  |
| L527     | False   | Bacteria | 0.00226  | 0.206%  | 0.0      | 1      | 0.542                       | 0.085   | 0.102    | 0.000817  | 0.0245%  |
| L1363    | False   | OD1      | 0.00215  | 0.196%  | 0.0      | 1      | 0.0661                      | 0.682   | 0.732    | 0.000759  | 0.0228%  |
| L1325    | False   | OD1      | 0.00189  | 0.172%  | 0.0      | 1      | 0.108                       | 0.707   | 0.745    | 0.000689  | 0.0207%  |
| L1328    | False   | OD1      | 0.00162  | 0.147%  | 0.0      | 1      | 0.0853                      | 0.701   | 0.742    | 0.000561  | 0.0168%  |
| L921     | False   | koll11   | 0.00162  | 0.147%  | 0.0      | 1      | 0.244                       | 0.038   | 0.0476   | 0.0006    | 0.018%   |
| L421     | False   | Bacteria | 0.00154  | 0.14%   | 0.0      | 1      | 0.607                       | 0.109   | 0.159    | 0.00103   | 0.031%   |
| L1391    | False   | ZB2      | 0.00133  | 0.121%  | 0.0      | 1      | 0.013                       | 0.349   | 0.346    | 0.00148   | 0.0445%  |
| L1315    | False   | OD1      | 0.00128  | 0.117%  | 0.0      | 1      | 0.223                       | 0.736   | 0.753    | 0.000726  | 0.0218%  |
| L1350    | False   | OD1      | 0.00111  | 0.101%  | 0.0      | 1      | 0.08                        | 0.697   | 0.739    | 0.000383  | 0.0115%  |
| L612     | False   | OP3      | 0.00109  | 0.0991% | 0.0      | 1      | 0.5                         | 0.0772  | 0.0969   | 0.000421  | 0.0126%  |
| L1323    | False   | OD1      | 0.00107  | 0.097%  | 0.0      | 1      | 0.211                       | 0.735   | 0.752    | 0.000569  | 0.0171%  |
| L1330    | False   | OD1      | 0.00105  | 0.0958% | 0.0      | 1      | 0.0852                      | 0.701   | 0.742    | 0.000364  | 0.0109%  |
| L1373    | False   | OD1      | 0.000981 | 0.0893% | 0.0      | 1      | 0.0169                      | 0.564   | 0.479    | 0.000596  | 0.0179%  |
| L1381    | False   | ZB2      | 0.000962 | 0.0876% | 0.0      | 1      | 0.0156                      | 0.564   | 0.479    | 0.000576  | 0.0173%  |
| L920     | False   | koll11   | 0.000958 | 0.0872% | 0.0      | 1      | 0.255                       | 0.0424  | 0.0511   | 0.000369  | 0.0111%  |
| L576     | False   | Bacteria | 0.000955 | 0.0869% | 0.0      | 1      | 0.532                       | 0.0813  | 0.0989   | 0.000326  | 0.00978% |
| L1332    | False   | OD1      | 0.00094  | 0.0855% | 0.0      | 1      | 0.084                       | 0.699   | 0.74     | 0.000327  | 0.00981% |
| L914     | False   | OP3      | 0.000912 | 0.083%  | 0.0      | 1      | 0.256                       | 0.0424  | 0.0511   | 0.000346  | 0.0104%  |
| L973     | False   | koll11   | 0.00086  | 0.0782% | 0.0      | 1      | 0.177                       | 0.0267  | 0.0352   | 0.000313  | 0.0094%  |
| L983     | False   | koll11   | 0.000811 | 0.0738% | 0.0      | 1      | 0.168                       | 0.025   | 0.0344   | 0.00031   | 0.00931% |
| L1386    | False   | ZB2      | 0.000789 | 0.0718% | 0.0      | 1      | 0.0025                      | 0.21    | 0.131    | 0.0012    | 0.0359%  |
| L1407    | False   | ZB2      | 0.000689 | 0.0628% | 0.0      | 1      | 0.00598                     | 0.296   | 0.32     | 0.000912  | 0.0274%  |
| L1383    | False   | ZB2      | 0.000579 | 0.0527% | 0.0      | 1      | 0.0156                      | 0.56    | 0.478    | 0.000355  | 0.0106%  |
| L1587    | False   | ZB2      | 0.000568 | 0.0517% | 0.0      | 1      | 0.000753                    | 0.0393  | 0.152    | 0.000633  | 0.019%   |
| L840     | False   | OP3      | 0.000566 | 0.0515% | 0.0      | 1      | 0.0647                      | 0.00704 | 0.00868  | 0.000272  | 0.00817% |
| L1401    | False   | ZB2      | 0.000519 | 0.0472% | 0.0      | 1      | 0.00856                     | 0.346   | 0.344    | 0.000552  | 0.0166%  |

|          |       |          |          |         |     |   |          |          |          |          |          |
|----------|-------|----------|----------|---------|-----|---|----------|----------|----------|----------|----------|
| L1768    | False | OD1      | 0.000511 | 0.0465% | 0.0 | 1 | 0.0277   | 0.00537  | 0.00169  | 0.000855 | 0.0257%  |
| L1393    | False | ZB2      | 0.000509 | 0.0464% | 0.0 | 1 | 0.0124   | 0.349    | 0.346    | 0.000563 | 0.0169%  |
| L620     | False | OP3      | 0.0005   | 0.0455% | 0.0 | 1 | 0.499    | 0.0771   | 0.0969   | 0.000194 | 0.00581% |
| L1370    | False | OD1      | 0.00048  | 0.0437% | 0.0 | 1 | 0.0654   | 0.641    | 0.578    | 0.00025  | 0.00751% |
| L706     | False | OP3      | 0.000455 | 0.0414% | 0.0 | 1 | 0.116    | 0.0148   | 0.0253   | 0.000327 | 0.0098%  |
| L622     | False | OP3      | 0.000422 | 0.0384% | 0.0 | 1 | 0.152    | 0.0209   | 0.0309   | 0.000233 | 0.007%   |
| L990     | False | koll11   | 0.00041  | 0.0373% | 0.0 | 1 | 0.153    | 0.0223   | 0.0335   | 0.000162 | 0.00485% |
| OTU_7148 | True  | OD1      | 0.000407 | 0.037%  | 0.0 | 1 | 0.0257   | 0.00496  | 0.00159  | 0.000767 | 0.023%   |
| L1371    | False | OD1      | 0.000407 | 0.037%  | 0.0 | 1 | 0.0648   | 0.641    | 0.578    | 0.000212 | 0.00636% |
| L938     | False | koll11   | 0.000403 | 0.0367% | 0.0 | 1 | 0.238    | 0.0377   | 0.0472   | 0.000153 | 0.0046%  |
| L925     | False | koll11   | 0.000391 | 0.0356% | 0.0 | 1 | 0.243    | 0.038    | 0.0476   | 0.000147 | 0.00441% |
| L621     | False | OP3      | 0.000374 | 0.0341% | 0.0 | 1 | 0.244    | 0.0347   | 0.0458   | 0.000181 | 0.00543% |
| L458     | False | OP11-4   | 0.000364 | 0.0331% | 0.0 | 1 | 0.0321   | 0.00626  | 0.00366  | 0.000265 | 0.00796% |
| L783     | False | OP3      | 0.000363 | 0.0331% | 0.0 | 1 | 0.056    | 0.00728  | 0.00883  | 0.000272 | 0.00816% |
| L443     | False | OP11     | 0.000355 | 0.0323% | 0.0 | 1 | 0.0365   | 0.00725  | 0.00475  | 0.000249 | 0.00746% |
| L1388    | False | ZB2      | 0.000353 | 0.0322% | 0.0 | 1 | 0.00249  | 0.209    | 0.13     | 0.000546 | 0.0164%  |
| L861     | False | koll11   | 0.000332 | 0.0302% | 0.0 | 1 | 0.0268   | 0.00674  | 0.00625  | 0.000418 | 0.0125%  |
| L838     | False | OP3      | 0.00032  | 0.0291% | 0.0 | 1 | 0.065    | 0.00704  | 0.00868  | 0.000154 | 0.00461% |
| L644     | False | OP3      | 0.000306 | 0.0278% | 0.0 | 1 | 0.14     | 0.0188   | 0.0305   | 0.000189 | 0.00568% |
| OTU_5414 | True  | ZB2      | 0.000297 | 0.0271% | 0.0 | 1 | 0.0048   | 0.268    | 0.248    | 0.000569 | 0.0171%  |
| L927     | False | koll11   | 0.000297 | 0.027%  | 0.0 | 1 | 0.241    | 0.038    | 0.0476   | 0.000113 | 0.00338% |
| L1317    | False | OD1      | 0.000291 | 0.0265% | 0.0 | 1 | 0.00977  | 0.000483 | 0.000393 | 0.000195 | 0.00584% |
| L1680    | False | OD1      | 0.000288 | 0.0262% | 0.0 | 1 | 0.0178   | 0.0039   | 0.00109  | 0.000209 | 0.00626% |
| L929     | False | koll11   | 0.000282 | 0.0257% | 0.0 | 1 | 0.241    | 0.0379   | 0.0473   | 0.000106 | 0.00318% |
| OTU_6187 | True  | ZB2      | 0.000276 | 0.0251% | 0.0 | 1 | 0.000135 | 0.0119   | 0.0193   | 0.000752 | 0.0226%  |
| L1384    | False | ZB2      | 0.000273 | 0.0248% | 0.0 | 1 | 0.00255  | 0.212    | 0.132    | 0.000399 | 0.012%   |
| OTU_65   | True  | OD1      | 0.000247 | 0.0225% | 0.0 | 1 | 0.00521  | 0.00203  | 0.000158 | 0.000604 | 0.0181%  |
| L577     | False | PRR-12   | 0.000244 | 0.0223% | 0.0 | 1 | 0.0324   | 0.00409  | 0.00199  | 0.000202 | 0.00606% |
| L173     | False | SM2F11   | 0.00024  | 0.0218% | 0.0 | 1 | 0.01     | 0.00209  | 0.000433 | 0.000202 | 0.00608% |
| L940     | False | koll11   | 0.000239 | 0.0218% | 0.0 | 1 | 0.238    | 0.0376   | 0.0472   | 9.05e-05 | 0.00272% |
| L1403    | False | ZB2      | 0.000238 | 0.0217% | 0.0 | 1 | 0.000542 | 0.05     | 0.0241   | 0.000582 | 0.0175%  |
| L968     | False | koll11   | 0.000236 | 0.0215% | 0.0 | 1 | 0.195    | 0.0296   | 0.041    | 8.94e-05 | 0.00268% |
| L1410    | False | ZB2      | 0.000236 | 0.0215% | 0.0 | 1 | 0.0058   | 0.292    | 0.313    | 0.000331 | 0.00993% |
| L950     | False | koll11   | 0.000233 | 0.0212% | 0.0 | 1 | 0.228    | 0.0353   | 0.046    | 9.2e-05  | 0.00276% |
| L1431    | False | ZB2      | 0.00023  | 0.021%  | 0.0 | 1 | 0.00512  | 0.0436   | 0.064    | 0.000332 | 0.00996% |
| L931     | False | koll11   | 0.000221 | 0.0201% | 0.0 | 1 | 0.241    | 0.0379   | 0.0473   | 8.32e-05 | 0.0025%  |
| L39      | False | OD1      | 0.000219 | 0.0199% | 0.0 | 1 | 0.0146   | 0.00251  | 0.00184  | 0.000285 | 0.00857% |
| L1767    | False | OD1      | 0.000217 | 0.0198% | 0.0 | 1 | 0.0668   | 0.0182   | 0.00455  | 0.000193 | 0.0058%  |
| L707     | False | PBS-25   | 0.000215 | 0.0196% | 0.0 | 1 | 0.0458   | 0.00624  | 0.0135   | 0.000337 | 0.0101%  |
| L645     | False | koll11   | 0.000214 | 0.0195% | 0.0 | 1 | 0.0235   | 0.00407  | 0.00514  | 0.000218 | 0.00655% |
| OTU_81   | True  | OD1      | 0.000203 | 0.0185% | 0.0 | 1 | 0.00796  | 0.00299  | 0.00102  | 0.000617 | 0.0185%  |
| L1427    | False | ZB2      | 0.000198 | 0.0181% | 0.0 | 1 | 0.0111   | 0.0695   | 0.0903   | 0.000381 | 0.0114%  |
| L1408    | False | ZB2      | 0.00019  | 0.0173% | 0.0 | 1 | 0.00581  | 0.293    | 0.313    | 0.000266 | 0.00798% |
| OTU_4624 | True  | PRR-11   | 0.000186 | 0.017%  | 0.0 | 1 | 0.00323  | 1.32e-05 | 0.000217 | 0.000452 | 0.0136%  |
| L744     | False | OP3      | 0.000185 | 0.0168% | 0.0 | 1 | 0.0704   | 0.00852  | 0.0118   | 0.000105 | 0.00314% |
| L987     | False | koll11   | 0.000179 | 0.0163% | 0.0 | 1 | 0.163    | 0.0243   | 0.0342   | 6.93e-05 | 0.00208% |
| L1233    | False | TM7      | 0.000179 | 0.0163% | 0.0 | 1 | 0.0252   | 0.013    | 0.0488   | 0.00176  | 0.0528%  |
| L1741    | False | OD1      | 0.000171 | 0.0155% | 0.0 | 1 | 0.0853   | 0.0239   | 0.00655  | 0.000135 | 0.00405% |
| OTU_185  | True  | PRR-12   | 0.000169 | 0.0154% | 0.0 | 1 | 0.0121   | 0.00205  | 0.00112  | 0.000508 | 0.0152%  |
| L1237    | False | TM7      | 0.000169 | 0.0154% | 0.0 | 1 | 0.0241   | 0.0127   | 0.0482   | 0.00166  | 0.0499%  |
| L1782    | False | OD1      | 0.000168 | 0.0153% | 0.0 | 1 | 0.0308   | 0.0103   | 0.00244  | 0.000237 | 0.00712% |
| L457     | False | OP11     | 0.000164 | 0.0149% | 0.0 | 1 | 0.0352   | 0.00708  | 0.00373  | 0.000104 | 0.00312% |
| OTU_8000 | True  | OD1      | 0.000154 | 0.014%  | 0.0 | 1 | 0.00944  | 0.000483 | 0.00038  | 0.000106 | 0.00318% |
| L969     | False | koll11   | 0.000141 | 0.0128% | 0.0 | 1 | 0.188    | 0.0283   | 0.0364   | 4.91e-05 | 0.00147% |
| L1428    | False | ZB2      | 0.000139 | 0.0127% | 0.0 | 1 | 0.00961  | 0.0453   | 0.0649   | 0.000266 | 0.00797% |
| L1809    | False | OD1      | 0.000138 | 0.0126% | 0.0 | 1 | 0.00834  | 0.00213  | 0.000169 | 0.000197 | 0.00592% |
| L1429    | False | ZB2      | 0.000138 | 0.0126% | 0.0 | 1 | 0.00539  | 0.0436   | 0.064    | 0.000201 | 0.00604% |
| L90      | False | ABY1     | 0.000135 | 0.0123% | 0.0 | 1 | 0.0206   | 0.00608  | 0.000982 | 0.000124 | 0.00372% |
| L1278    | False | TM7-3    | 0.000134 | 0.0122% | 0.0 | 1 | 0.0103   | 0.000317 | 0.0271   | 0.000642 | 0.0193%  |
| L583     | False | PRR-12   | 0.000133 | 0.0121% | 0.0 | 1 | 0.012    | 0.00143  | 0.000674 | 0.000143 | 0.0043%  |
| L977     | False | koll11   | 0.00013  | 0.0118% | 0.0 | 1 | 0.172    | 0.0259   | 0.0348   | 4.81e-05 | 0.00144% |
| L785     | False | OP3      | 0.000129 | 0.0118% | 0.0 | 1 | 0.0559   | 0.00728  | 0.00883  | 9.67e-05 | 0.0029%  |
| L423     | False | Bacteria | 0.000128 | 0.0117% | 0.0 | 1 | 0.0388   | 0.0107   | 0.00834  | 0.000181 | 0.00544% |
| L1742    | False | OD1      | 0.000126 | 0.0115% | 0.0 | 1 | 0.0185   | 0.0057   | 0.002    | 0.000159 | 0.00479% |

|          |       |          |          |          |     |   |          |          |          |          |           |
|----------|-------|----------|----------|----------|-----|---|----------|----------|----------|----------|-----------|
| L934     | False | koll11   | 0.000123 | 0.0112%  | 0.0 | 1 | 0.239    | 0.0379   | 0.0472   | 4.66e-05 | 0.0014%   |
| L1415    | False | ZB2      | 0.000123 | 0.0112%  | 0.0 | 1 | 0.000533 | 0.0245   | 0.0641   | 0.000251 | 0.00752%  |
| L52      | False | ABY1     | 0.000119 | 0.0108%  | 0.0 | 1 | 0.00957  | 0.0412   | 0.0175   | 0.000584 | 0.0175%   |
| L1539    | False | ZB2      | 0.000115 | 0.0105%  | 0.0 | 1 | 0.0234   | 0.00394  | 0.00218  | 0.000114 | 0.00342%  |
| OTU_8178 | True  | TM7-1    | 0.000115 | 0.0105%  | 0.0 | 1 | 0.0      | 0.0      | 0.00724  | 0.000289 | 0.00866%  |
| L1316    | False | OD1      | 0.000115 | 0.0104%  | 0.0 | 1 | 0.0121   | 0.00064  | 0.000398 | 6.51e-05 | 0.00195%  |
| L837     | False | OP3      | 0.000114 | 0.0104%  | 0.0 | 1 | 0.0918   | 0.0138   | 0.0149   | 5.67e-05 | 0.0017%   |
| L1797    | False | OD1      | 0.000114 | 0.0104%  | 0.0 | 1 | 0.0268   | 0.00967  | 0.00203  | 0.000184 | 0.00553%  |
| L467     | False | OP11-4   | 0.000113 | 0.0103%  | 0.0 | 1 | 0.0257   | 0.00548  | 0.00257  | 0.000123 | 0.0037%   |
| L1829    | False | OD1      | 0.000112 | 0.0102%  | 0.0 | 1 | 0.0133   | 0.00636  | 0.00152  | 0.000287 | 0.00861%  |
| L1013    | False | koll11   | 0.000109 | 0.00995% | 0.0 | 1 | 0.0221   | 0.00426  | 0.00246  | 9.49e-05 | 0.00285%  |
| L790     | False | OP3      | 0.000108 | 0.00985% | 0.0 | 1 | 0.0545   | 0.00719  | 0.00853  | 8.23e-05 | 0.00247%  |
| L1841    | False | OD1      | 0.000107 | 0.00976% | 0.0 | 1 | 0.0101   | 0.00336  | 0.000654 | 0.000187 | 0.00562%  |
| L441     | False | Bacteria | 0.000104 | 0.0095%  | 0.0 | 1 | 0.0365   | 0.0099   | 0.00497  | 0.000105 | 0.00315%  |
| L1452    | False | ZB2      | 0.000104 | 0.00948% | 0.0 | 1 | 0.00049  | 0.0205   | 0.032    | 0.000158 | 0.00473%  |
| OTU_9143 | True  | OD1      | 0.000104 | 0.00946% | 0.0 | 1 | 0.0      | 0.00264  | 0.000223 | 0.000441 | 0.0132%   |
| L1446    | False | ZB2      | 0.000102 | 0.0093%  | 0.0 | 1 | 0.000116 | 0.0167   | 0.0229   | 0.000133 | 0.004%    |
| L847     | False | koll11   | 0.000102 | 0.00928% | 0.0 | 1 | 0.0276   | 0.00358  | 0.00463  | 0.000107 | 0.0032%   |
| L581     | False | PRR-12   | 0.000101 | 0.00917% | 0.0 | 1 | 0.0127   | 0.00143  | 0.000674 | 0.000101 | 0.00302%  |
| L171     | False | OD1      | 0.0001   | 0.00911% | 0.0 | 1 | 0.029    | 0.00765  | 0.00349  | 0.000108 | 0.00323%  |
| OTU_6344 | True  | OD1      | 9.96e-05 | 0.00907% | 0.0 | 1 | 0.00623  | 0.000622 | 5.18e-05 | 0.000158 | 0.00473%  |
| L1235    | False | TM7      | 9.91e-05 | 0.00902% | 0.0 | 1 | 0.0248   | 0.013    | 0.0488   | 0.000977 | 0.0293%   |
| L1307    | False | OD1      | 9.76e-05 | 0.00888% | 0.0 | 1 | 0.00548  | 0.000419 | 0.000664 | 0.000142 | 0.00427%  |
| L711     | False | PBS-25   | 9.75e-05 | 0.00887% | 0.0 | 1 | 0.0455   | 0.00624  | 0.0133   | 0.000155 | 0.00464%  |
| L578     | False | PRR-12   | 9.56e-05 | 0.0087%  | 0.0 | 1 | 0.0287   | 0.00375  | 0.00198  | 0.000102 | 0.00306%  |
| L1743    | False | OD1      | 9.42e-05 | 0.00858% | 0.0 | 1 | 0.0171   | 0.00398  | 0.000155 | 5.93e-05 | 0.00178%  |
| L1497    | False | ZB2      | 9.23e-05 | 0.0084%  | 0.0 | 1 | 0.00146  | 0.0242   | 0.0254   | 0.000367 | 0.011%    |
| L51      | False | OD1      | 9.15e-05 | 0.00833% | 0.0 | 1 | 0.0454   | 0.0933   | 0.0459   | 0.000616 | 0.0185%   |
| L1783    | False | OD1      | 9.15e-05 | 0.00833% | 0.0 | 1 | 0.0306   | 0.0103   | 0.00238  | 0.000129 | 0.00386%  |
| L495     | False | OP11-4   | 9.09e-05 | 0.00827% | 0.0 | 1 | 0.0133   | 0.00323  | 0.0017   | 0.000235 | 0.00706%  |
| L31      | False | OD1      | 9.02e-05 | 0.00821% | 0.0 | 1 | 0.0159   | 0.00253  | 0.00186  | 0.000111 | 0.00332%  |
| L709     | False | PBS-25   | 8.97e-05 | 0.00816% | 0.0 | 1 | 0.0455   | 0.00624  | 0.0135   | 0.000143 | 0.0043%   |
| L1010    | False | koll11   | 8.88e-05 | 0.00808% | 0.0 | 1 | 0.0899   | 0.0148   | 0.0238   | 5.64e-05 | 0.00169%  |
| L988     | False | koll11   | 8.82e-05 | 0.00802% | 0.0 | 1 | 0.155    | 0.0226   | 0.0336   | 3.4e-05  | 0.00102%  |
| L1269    | False | TM7-1    | 8.77e-05 | 0.00798% | 0.0 | 1 | 0.00813  | 0.0      | 0.0      | 0.000207 | 0.0062%   |
| L1656    | False | OD1      | 8.74e-05 | 0.00796% | 0.0 | 1 | 0.00869  | 0.00319  | 0.00123  | 0.000248 | 0.00744%  |
| L932     | False | koll11   | 8.71e-05 | 0.00793% | 0.0 | 1 | 0.239    | 0.0379   | 0.0472   | 3.3e-05  | 0.000989% |
| OTU_9113 | True  | TM7-1    | 8.66e-05 | 0.00788% | 0.0 | 1 | 0.00482  | 0.0      | 0.0      | 0.000239 | 0.00716%  |
| OTU_7453 | True  | ABY1     | 8.63e-05 | 0.00785% | 0.0 | 1 | 0.00349  | 0.000655 | 0.000208 | 0.000158 | 0.00474%  |
| OTU_5981 | True  | ZB2      | 8.57e-05 | 0.0078%  | 0.0 | 1 | 0.000474 | 0.0196   | 0.0601   | 0.000178 | 0.00533%  |
| L28      | False | OD1      | 8.57e-05 | 0.0078%  | 0.0 | 1 | 0.142    | 0.143    | 0.0792   | 0.000722 | 0.0217%   |
| OTU_6636 | True  | ABY1     | 8.56e-05 | 0.00779% | 0.0 | 1 | 0.00596  | 0.00229  | 0.000736 | 0.000294 | 0.00882%  |
| L1009    | False | koll11   | 8.55e-05 | 0.00778% | 0.0 | 1 | 0.0985   | 0.0149   | 0.0241   | 5.1e-05  | 0.00153%  |
| L459     | False | OP11-4   | 8.35e-05 | 0.0076%  | 0.0 | 1 | 0.0264   | 0.00558  | 0.0031   | 8.82e-05 | 0.00265%  |
| L1842    | False | OD1      | 8.28e-05 | 0.00754% | 0.0 | 1 | 0.00492  | 0.00132  | 0.000497 | 0.000189 | 0.00566%  |
| L1028    | False | koll11   | 7.94e-05 | 0.00723% | 0.0 | 1 | 0.033    | 0.00454  | 0.0123   | 0.000106 | 0.00317%  |
| L1283    | False | TM7-3    | 7.83e-05 | 0.00713% | 0.0 | 1 | 0.00036  | 9.06e-07 | 0.0238   | 0.000209 | 0.00626%  |
| L1594    | False | OD1      | 7.76e-05 | 0.00707% | 0.0 | 1 | 0.000224 | 0.00884  | 0.00327  | 0.000164 | 0.00493%  |
| L1246    | False | TM7-1    | 7.7e-05  | 0.00701% | 0.0 | 1 | 2.45e-05 | 0.0105   | 0.00754  | 0.000162 | 0.00485%  |
| L1449    | False | ZB2      | 7.63e-05 | 0.00694% | 0.0 | 1 | 0.00127  | 0.0256   | 0.0394   | 9.9e-05  | 0.00297%  |
| L1277    | False | TM7      | 7.58e-05 | 0.0069%  | 0.0 | 1 | 0.011    | 0.000535 | 0.0273   | 0.000372 | 0.0112%   |
| L390     | False | ABY1     | 7.54e-05 | 0.00686% | 0.0 | 1 | 0.00446  | 0.000429 | 0.000268 | 6.48e-05 | 0.00195%  |
| L1450    | False | ZB2      | 7.44e-05 | 0.00677% | 0.0 | 1 | 0.000523 | 0.0208   | 0.032    | 0.000113 | 0.0034%   |
| L792     | False | OP3      | 7.38e-05 | 0.00672% | 0.0 | 1 | 0.0533   | 0.00697  | 0.0084   | 5.66e-05 | 0.0017%   |
| L1807    | False | OD1      | 7.35e-05 | 0.00669% | 0.0 | 1 | 0.011    | 0.00309  | 0.000321 | 0.000108 | 0.00325%  |
| L1655    | False | OD1      | 7.28e-05 | 0.00663% | 0.0 | 1 | 0.0221   | 0.00657  | 0.00243  | 9.31e-05 | 0.00279%  |
| L1443    | False | ZB2      | 7.2e-05  | 0.00655% | 0.0 | 1 | 0.00288  | 0.0428   | 0.063    | 8.95e-05 | 0.00269%  |
| L766     | False | OP3      | 7.17e-05 | 0.00653% | 0.0 | 1 | 0.0598   | 0.00764  | 0.00917  | 4.76e-05 | 0.00143%  |
| OTU_7115 | True  | ABY1     | 7.12e-05 | 0.00648% | 0.0 | 1 | 9.62e-05 | 0.0125   | 0.0104   | 0.00017  | 0.0051%   |
| OTU_6068 | True  | OD1      | 7.11e-05 | 0.00647% | 0.0 | 1 | 0.00236  | 0.000157 | 5.86e-06 | 0.000104 | 0.00312%  |
| L232     | False | ABY1     | 7.01e-05 | 0.00638% | 0.0 | 1 | 0.0114   | 0.00276  | 0.00123  | 0.000114 | 0.00341%  |
| L1777    | False | OD1      | 7.01e-05 | 0.00638% | 0.0 | 1 | 0.0391   | 0.0128   | 0.00285  | 7.67e-05 | 0.0023%   |
| L713     | False | PBS-25   | 6.97e-05 | 0.00635% | 0.0 | 1 | 0.0451   | 0.00623  | 0.0133   | 0.000112 | 0.00338%  |
| L1781    | False | OD1      | 6.95e-05 | 0.00633% | 0.0 | 1 | 0.0382   | 0.0128   | 0.00285  | 7.95e-05 | 0.00239%  |
| L1285    | False | TM7-3    | 6.86e-05 | 0.00624% | 0.0 | 1 | 0.00036  | 9.06e-07 | 0.023    | 0.000183 | 0.0055%   |

|           |       |        |          |          |     |   |          |          |          |          |           |
|-----------|-------|--------|----------|----------|-----|---|----------|----------|----------|----------|-----------|
| L605      | False | PRR-12 | 6.83e-05 | 0.00622% | 0.0 | 1 | 0.00374  | 0.000341 | 2.96e-06 | 0.000116 | 0.00348%  |
| OTU_6581  | True  | ZB2    | 6.79e-05 | 0.00618% | 0.0 | 1 | 0.000284 | 0.0205   | 0.032    | 9.81e-05 | 0.00294%  |
| OTU_9100  | True  | TM7    | 6.72e-05 | 0.00612% | 0.0 | 1 | 1.51e-05 | 1.27e-06 | 0.00583  | 0.000215 | 0.00646%  |
| L843      | False | koll11 | 6.7e-05  | 0.0061%  | 0.0 | 1 | 0.0393   | 0.00429  | 0.00603  | 4.93e-05 | 0.00148%  |
| L594      | False | PRR-12 | 6.62e-05 | 0.00602% | 0.0 | 1 | 0.016    | 0.00229  | 0.00121  | 0.000122 | 0.00365%  |
| L989      | False | koll11 | 6.52e-05 | 0.00594% | 0.0 | 1 | 0.155    | 0.0225   | 0.0336   | 2.55e-05 | 0.000765% |
| L1596     | False | OD1    | 6.39e-05 | 0.00582% | 0.0 | 1 | 0.000224 | 0.00883  | 0.00275  | 0.000119 | 0.00358%  |
| L628      | False | PBS-25 | 6.27e-05 | 0.0057%  | 0.0 | 1 | 0.00536  | 0.000215 | 7.94e-05 | 8.42e-05 | 0.00253%  |
| OTU_7957  | True  | OD1    | 6.2e-05  | 0.00564% | 0.0 | 1 | 0.00218  | 0.000711 | 1.73e-05 | 0.000141 | 0.00423%  |
| L789      | False | OP3    | 6.15e-05 | 0.0056%  | 0.0 | 1 | 0.0547   | 0.00719  | 0.00853  | 4.64e-05 | 0.00139%  |
| L360      | False | ABY1   | 6.13e-05 | 0.00558% | 0.0 | 1 | 0.00528  | 0.000904 | 0.000212 | 0.000101 | 0.00305%  |
| OTU_2703  | True  | koll11 | 6.09e-05 | 0.00554% | 0.0 | 1 | 0.0128   | 0.00178  | 0.000761 | 6.52e-05 | 0.00196%  |
| L942      | False | koll11 | 6.07e-05 | 0.00552% | 0.0 | 1 | 0.238    | 0.0373   | 0.0471   | 2.27e-05 | 0.000683% |
| L123      | False | ABY1   | 6.01e-05 | 0.00547% | 0.0 | 1 | 6.57e-05 | 0.00946  | 0.00624  | 0.000124 | 0.00372%  |
| L1843     | False | OD1    | 5.98e-05 | 0.00544% | 0.0 | 1 | 0.00481  | 0.00117  | 0.000494 | 0.00013  | 0.00389%  |
| L767      | False | OP3    | 5.95e-05 | 0.00542% | 0.0 | 1 | 0.0596   | 0.00764  | 0.00917  | 3.97e-05 | 0.00119%  |
| L72       | False | ABY1   | 5.93e-05 | 0.0054%  | 0.0 | 1 | 0.000583 | 0.0313   | 0.00889  | 0.00013  | 0.00389%  |
| OTU_260   | True  | koll11 | 5.93e-05 | 0.0054%  | 0.0 | 1 | 0.0244   | 0.00264  | 0.00183  | 5.78e-05 | 0.00173%  |
| L148      | False | OD1    | 5.93e-05 | 0.0054%  | 0.0 | 1 | 0.00304  | 0.000574 | 0.000137 | 9.28e-05 | 0.00278%  |
| L61       | False | ABY1   | 5.92e-05 | 0.00539% | 0.0 | 1 | 0.00431  | 0.04     | 0.0174   | 0.000185 | 0.00555%  |
| L623      | False | PBS-25 | 5.81e-05 | 0.00529% | 0.0 | 1 | 0.0123   | 0.00208  | 0.000434 | 3.75e-05 | 0.00113%  |
| OTU_6197  | True  | OD1    | 5.72e-05 | 0.0052%  | 0.0 | 1 | 0.00341  | 0.000185 | 0.000455 | 0.000103 | 0.0031%   |
| OTU_347   | True  | koll11 | 5.68e-05 | 0.00517% | 0.0 | 1 | 0.00682  | 0.000429 | 0.000813 | 0.000143 | 0.00429%  |
| OTU_8254  | True  | OD1    | 5.62e-05 | 0.00512% | 0.0 | 1 | 0.000777 | 3.89e-05 | 1.52e-05 | 8.43e-05 | 0.00253%  |
| L512      | False | OP11-3 | 5.51e-05 | 0.00502% | 0.0 | 1 | 0.00226  | 0.000407 | 5.68e-05 | 0.000147 | 0.0044%   |
| L1011     | False | koll11 | 5.51e-05 | 0.00501% | 0.0 | 1 | 0.0788   | 0.0128   | 0.0207   | 4.14e-05 | 0.00124%  |
| L410      | False | ABY1   | 5.51e-05 | 0.00501% | 0.0 | 1 | 0.000306 | 0.00469  | 0.0065   | 0.000154 | 0.00463%  |
| L1808     | False | OD1    | 5.44e-05 | 0.00496% | 0.0 | 1 | 0.00896  | 0.00215  | 0.000177 | 7.05e-05 | 0.00212%  |
| OTU_10802 | True  | OP11-4 | 5.41e-05 | 0.00493% | 0.0 | 1 | 0.00169  | 9.87e-05 | 1.33e-05 | 6.35e-05 | 0.00191%  |
| L1661     | False | OD1    | 5.35e-05 | 0.00487% | 0.0 | 1 | 0.0134   | 0.00339  | 0.00121  | 7.53e-05 | 0.00226%  |
| L733      | False | PBS-25 | 5.34e-05 | 0.00486% | 0.0 | 1 | 0.02     | 0.0024   | 0.00211  | 6.83e-05 | 0.00205%  |
| L1663     | False | OD1    | 5.33e-05 | 0.00485% | 0.0 | 1 | 0.00672  | 0.000633 | 5.18e-05 | 7.12e-05 | 0.00214%  |
| OTU_7960  | True  | OD1    | 5.31e-05 | 0.00484% | 0.0 | 1 | 0.000864 | 1.04e-05 | 1.61e-05 | 8.36e-05 | 0.00251%  |
| L648      | False | koll11 | 5.27e-05 | 0.0048%  | 0.0 | 1 | 0.0221   | 0.00402  | 0.00503  | 6.05e-05 | 0.00181%  |
| L951      | False | koll11 | 5.27e-05 | 0.0048%  | 0.0 | 1 | 0.0333   | 0.00569  | 0.00493  | 5.88e-05 | 0.00176%  |
| OTU_281   | True  | koll11 | 5.26e-05 | 0.00479% | 0.0 | 1 | 0.00597  | 0.000432 | 0.00126  | 0.000117 | 0.00353%  |
| L809      | False | OP3    | 5.26e-05 | 0.00478% | 0.0 | 1 | 0.0393   | 0.00465  | 0.00556  | 4.04e-05 | 0.00121%  |
| OTU_8880  | True  | ABY1   | 5.26e-05 | 0.00478% | 0.0 | 1 | 0.00237  | 0.000128 | 9.76e-07 | 7.26e-05 | 0.00218%  |
| OTU_6128  | True  | ZB2    | 5.21e-05 | 0.00474% | 0.0 | 1 | 0.00425  | 0.000472 | 0.000233 | 8.41e-05 | 0.00252%  |
| L1282     | False | TM7-3  | 5.19e-05 | 0.00473% | 0.0 | 1 | 0.0103   | 0.000291 | 0.0265   | 0.000259 | 0.00776%  |
| OTU_5941  | True  | OD1    | 5.17e-05 | 0.00471% | 0.0 | 1 | 0.00115  | 0.000783 | 6.32e-05 | 0.000255 | 0.00764%  |
| L1309     | False | OD1    | 5.12e-05 | 0.00466% | 0.0 | 1 | 0.00514  | 0.000419 | 0.000661 | 8.03e-05 | 0.00241%  |
| L162      | False | ABY1   | 5.08e-05 | 0.00463% | 0.0 | 1 | 0.00524  | 0.000518 | 5.12e-05 | 9.2e-05  | 0.00276%  |
| L760      | False | OP3    | 5.08e-05 | 0.00463% | 0.0 | 1 | 0.0619   | 0.00789  | 0.00929  | 3.43e-05 | 0.00103%  |
| OTU_8200  | True  | ABY1   | 5.03e-05 | 0.00457% | 0.0 | 1 | 0.00164  | 7.29e-05 | 8.4e-06  | 6.28e-05 | 0.00188%  |
| L800      | False | OP3    | 5.02e-05 | 0.00457% | 0.0 | 1 | 0.0521   | 0.00649  | 0.00837  | 3.81e-05 | 0.00114%  |
| L81       | False | ABY1   | 4.96e-05 | 0.00451% | 0.0 | 1 | 0.0224   | 0.00919  | 0.00225  | 6.09e-05 | 0.00183%  |
| OTU_8447  | True  | ABY1   | 4.95e-05 | 0.0045%  | 0.0 | 1 | 0.000623 | 0.00601  | 0.0108   | 0.000167 | 0.00501%  |
| OTU_9114  | True  | TM7-1  | 4.92e-05 | 0.00448% | 0.0 | 1 | 0.0033   | 0.0      | 0.0      | 0.000108 | 0.00324%  |
| L1853     | False | OD1    | 4.92e-05 | 0.00448% | 0.0 | 1 | 0.00738  | 0.00247  | 0.000408 | 5.08e-05 | 0.00152%  |
| L184      | False | SM2F11 | 4.78e-05 | 0.00435% | 0.0 | 1 | 0.0077   | 0.00167  | 0.00021  | 4.12e-05 | 0.00124%  |
| L389      | False | ABY1   | 4.78e-05 | 0.00435% | 0.0 | 1 | 0.0114   | 0.0038   | 0.00112  | 8.3e-05  | 0.00249%  |
| L1005     | False | koll11 | 4.76e-05 | 0.00433% | 0.0 | 1 | 0.106    | 0.0154   | 0.0254   | 2.69e-05 | 0.000806% |
| L1833     | False | OD1    | 4.73e-05 | 0.0043%  | 0.0 | 1 | 7.22e-05 | 0.00166  | 0.000125 | 0.000233 | 0.00699%  |
| L1412     | False | ZB2    | 4.7e-05  | 0.00428% | 0.0 | 1 | 0.000995 | 0.0246   | 0.0649   | 9.63e-05 | 0.00289%  |
| OTU_10861 | True  | OP11-4 | 4.63e-05 | 0.00422% | 0.0 | 1 | 0.00522  | 0.000679 | 0.000561 | 6.88e-05 | 0.00206%  |
| L47       | False | OD1    | 4.6e-05  | 0.00419% | 0.0 | 1 | 0.0458   | 0.0936   | 0.0459   | 0.000309 | 0.00929%  |
| L481      | False | OP11-4 | 4.6e-05  | 0.00418% | 0.0 | 1 | 0.0225   | 0.00498  | 0.00244  | 6.38e-05 | 0.00191%  |
| L68       | False | ABY1   | 4.6e-05  | 0.00418% | 0.0 | 1 | 0.00215  | 0.0379   | 0.0143   | 0.000113 | 0.0034%   |
| L1166     | False | koll11 | 4.53e-05 | 0.00412% | 0.0 | 1 | 0.011    | 0.00437  | 0.00343  | 0.000205 | 0.00616%  |
| L1567     | False | ZB2    | 4.53e-05 | 0.00412% | 0.0 | 1 | 0.00314  | 0.000473 | 0.000589 | 6.4e-05  | 0.00192%  |
| OTU_7795  | True  | ABY1   | 4.5e-05  | 0.00409% | 0.0 | 1 | 1.14e-05 | 0.00417  | 0.00496  | 0.000109 | 0.00328%  |
| L158      | False | ABY1   | 4.49e-05 | 0.00409% | 0.0 | 1 | 0.00584  | 0.00062  | 7.92e-05 | 7.15e-05 | 0.00215%  |
| OTU_7221  | True  | ABY1   | 4.46e-05 | 0.00406% | 0.0 | 1 | 0.00512  | 0.000186 | 7.78e-05 | 3.57e-05 | 0.00107%  |
| L320      | False | OD1    | 4.43e-05 | 0.00403% | 0.0 | 1 | 0.0118   | 0.00195  | 0.000849 | 4.1e-05  | 0.00123%  |

|           |       |              |          |          |     |   |          |          |          |          |           |
|-----------|-------|--------------|----------|----------|-----|---|----------|----------|----------|----------|-----------|
| L1543     | False | ZB2          | 4.38e-05 | 0.00399% | 0.0 | 1 | 0.0231   | 0.00394  | 0.00218  | 4.46e-05 | 0.00134%  |
| L366      | False | ABY1         | 4.34e-05 | 0.00395% | 0.0 | 1 | 0.0049   | 0.000528 | 8.29e-05 | 3.75e-05 | 0.00112%  |
| L794      | False | OP3          | 4.34e-05 | 0.00395% | 0.0 | 1 | 0.0526   | 0.00689  | 0.00838  | 3.36e-05 | 0.00101%  |
| L480      | False | OP11-4       | 4.31e-05 | 0.00393% | 0.0 | 1 | 0.023    | 0.00502  | 0.00247  | 5.69e-05 | 0.00171%  |
| L952      | False | koll11       | 4.27e-05 | 0.00389% | 0.0 | 1 | 0.0328   | 0.00512  | 0.00485  | 4.82e-05 | 0.00145%  |
| L579      | False | PRR-12       | 4.21e-05 | 0.00383% | 0.0 | 1 | 0.0127   | 0.00146  | 0.000773 | 4.31e-05 | 0.00129%  |
| L54       | False | ABY1         | 4.19e-05 | 0.00382% | 0.0 | 1 | 0.00957  | 0.0408   | 0.0175   | 0.000212 | 0.00636%  |
| L89       | False | ABY1         | 4.09e-05 | 0.00372% | 0.0 | 1 | 0.0206   | 0.00841  | 0.00224  | 5.01e-05 | 0.0015%   |
| L45       | False | OD1          | 4e-05    | 0.00364% | 0.0 | 1 | 0.103    | 0.136    | 0.076    | 0.000461 | 0.0138%   |
| L807      | False | OP3          | 4e-05    | 0.00364% | 0.0 | 1 | 0.0463   | 0.00556  | 0.00712  | 3.16e-05 | 0.000948% |
| L1593     | False | OD1          | 3.99e-05 | 0.00363% | 0.0 | 1 | 0.000224 | 0.0091   | 0.00328  | 7.89e-05 | 0.00237%  |
| L1791     | False | OD1          | 3.98e-05 | 0.00363% | 0.0 | 1 | 0.00253  | 0.000443 | 0.000275 | 5.03e-05 | 0.00151%  |
| OTU_7384  | True  | ABY1         | 3.98e-05 | 0.00362% | 0.0 | 1 | 6.57e-05 | 0.00816  | 0.006    | 0.0001   | 0.00302%  |
| OTU_6646  | True  | ZB2          | 3.92e-05 | 0.00357% | 0.0 | 1 | 2.15e-05 | 0.0042   | 0.00473  | 9.95e-05 | 0.00299%  |
| L511      | False | OP11         | 3.92e-05 | 0.00357% | 0.0 | 1 | 0.00308  | 0.000822 | 6.54e-05 | 8.8e-05  | 0.00264%  |
| L507      | False | OP11-4       | 3.9e-05  | 0.00355% | 0.0 | 1 | 0.00555  | 0.000681 | 0.000561 | 5.09e-05 | 0.00153%  |
| OTU_6705  | True  | ZB2          | 3.88e-05 | 0.00353% | 0.0 | 1 | 2.2e-05  | 0.00175  | 0.0047   | 4.95e-05 | 0.00149%  |
| L1500     | False | ZB2          | 3.88e-05 | 0.00353% | 0.0 | 1 | 0.000362 | 0.0121   | 0.00608  | 0.000218 | 0.00656%  |
| OTU_188   | True  | koll11       | 3.84e-05 | 0.00349% | 0.0 | 1 | 0.00649  | 1.26e-07 | 0.0      | 8.53e-05 | 0.00256%  |
| L1402     | False | ZB2          | 3.84e-05 | 0.00349% | 0.0 | 1 | 0.00258  | 0.05     | 0.0241   | 0.000119 | 0.00356%  |
| L46       | False | OD1          | 3.8e-05  | 0.00346% | 0.0 | 1 | 0.0516   | 0.0943   | 0.046    | 0.000271 | 0.00812%  |
| OTU_5604  | True  | OD1          | 3.8e-05  | 0.00346% | 0.0 | 1 | 0.0152   | 0.00372  | 0.00013  | 2.7e-05  | 0.000811% |
| L93       | False | ABY1         | 3.73e-05 | 0.00339% | 0.0 | 1 | 0.019    | 0.00498  | 0.000915 | 3e-05    | 0.0009%   |
| L646      | False | koll11       | 3.72e-05 | 0.00339% | 0.0 | 1 | 0.0221   | 0.00402  | 0.00514  | 4.29e-05 | 0.00129%  |
| OTU_314   | True  | koll11       | 3.72e-05 | 0.00338% | 0.0 | 1 | 0.0105   | 0.00165  | 0.00331  | 0.000109 | 0.00326%  |
| OTU_6570  | True  | SM2F11       | 3.71e-05 | 0.00338% | 0.0 | 1 | 0.00161  | 2.07e-05 | 1.05e-06 | 3.78e-05 | 0.00114%  |
| L597      | False | PRR-12       | 3.69e-05 | 0.00336% | 0.0 | 1 | 0.00366  | 0.000242 | 9.13e-05 | 3.66e-05 | 0.0011%   |
| L1855     | False | OD1          | 3.64e-05 | 0.00331% | 0.0 | 1 | 0.00683  | 0.00245  | 0.000404 | 4.29e-05 | 0.00129%  |
| OTU_10771 | True  | OP11-3       | 3.62e-05 | 0.00329% | 0.0 | 1 | 0.00135  | 0.0      | 0.0      | 7.88e-05 | 0.00236%  |
| L1092     | False | koll11       | 3.6e-05  | 0.00327% | 0.0 | 1 | 0.00992  | 0.00186  | 0.00186  | 6.11e-05 | 0.00184%  |
| L1444     | False | ZB2          | 3.6e-05  | 0.00327% | 0.0 | 1 | 0.00161  | 0.0172   | 0.0237   | 7.03e-05 | 0.00211%  |
| L1255     | False | TM7-1        | 3.59e-05 | 0.00327% | 0.0 | 1 | 0.000115 | 0.0      | 0.00724  | 9.75e-05 | 0.00293%  |
| L1459     | False | ZB2          | 3.57e-05 | 0.00325% | 0.0 | 1 | 0.0      | 0.000231 | 0.00178  | 9.48e-05 | 0.00285%  |
| L300      | False | ABY1         | 3.55e-05 | 0.00323% | 0.0 | 1 | 0.000693 | 0.00986  | 0.00586  | 9.84e-05 | 0.00295%  |
| L488      | False | OP11-4       | 3.54e-05 | 0.00322% | 0.0 | 1 | 0.00732  | 0.00153  | 0.000723 | 4.2e-05  | 0.00126%  |
| L260      | False | OD1          | 3.52e-05 | 0.0032%  | 0.0 | 1 | 0.0126   | 0.0134   | 0.00599  | 0.000417 | 0.0125%   |
| L984      | False | koll11       | 3.48e-05 | 0.00317% | 0.0 | 1 | 0.00545  | 0.000735 | 0.000162 | 5.79e-05 | 0.00174%  |
| L1426     | False | OD1          | 3.48e-05 | 0.00316% | 0.0 | 1 | 0.0244   | 0.0729   | 0.0965   | 0.000112 | 0.00337%  |
| L359      | False | OD1          | 3.46e-05 | 0.00315% | 0.0 | 1 | 0.00615  | 0.00092  | 0.000213 | 4.8e-05  | 0.00144%  |
| L811      | False | OP3          | 3.44e-05 | 0.00313% | 0.0 | 1 | 0.0392   | 0.00462  | 0.00556  | 2.65e-05 | 0.000795% |
| L140      | False | ABY1         | 3.39e-05 | 0.00309% | 0.0 | 1 | 0.0042   | 0.0169   | 0.0056   | 0.000236 | 0.00708%  |
| OTU_7302  | True  | ABY1         | 3.39e-05 | 0.00309% | 0.0 | 1 | 0.00417  | 0.000979 | 0.000116 | 6.8e-05  | 0.00204%  |
| L803      | False | OP3          | 3.39e-05 | 0.00308% | 0.0 | 1 | 0.0463   | 0.00581  | 0.00741  | 2.77e-05 | 0.000831% |
| L585      | False | PRR-12       | 3.37e-05 | 0.00307% | 0.0 | 1 | 0.0119   | 0.00143  | 0.00065  | 3.73e-05 | 0.00112%  |
| OTU_7971  | True  | OD1          | 3.34e-05 | 0.00304% | 0.0 | 1 | 0.000898 | 0.000107 | 3.21e-05 | 6.7e-05  | 0.00201%  |
| L1546     | False | ZB2          | 3.31e-05 | 0.00301% | 0.0 | 1 | 0.0212   | 0.00376  | 0.00178  | 3.44e-05 | 0.00103%  |
| L1885     | False | OD1          | 3.29e-05 | 0.003%   | 0.0 | 1 | 0.00372  | 0.000925 | 0.00018  | 3.82e-05 | 0.00115%  |
| OTU_380   | True  | koll11       | 3.27e-05 | 0.00297% | 0.0 | 1 | 0.00362  | 0.000575 | 3.23e-05 | 5.82e-05 | 0.00175%  |
| L1230     | False | Acetothermia | 3.27e-05 | 0.00297% | 0.0 | 1 | 0.000697 | 2.53e-05 | 0.0      | 7.07e-05 | 0.00212%  |
| L1831     | False | OD1          | 3.26e-05 | 0.00297% | 0.0 | 1 | 0.0121   | 0.00558  | 0.00145  | 8.34e-05 | 0.0025%   |
| L434      | False | WCHB1-64     | 3.26e-05 | 0.00296% | 0.0 | 1 | 0.000383 | 0.000126 | 0.00163  | 0.000134 | 0.00401%  |
| OTU_7053  | True  | ABY1         | 3.16e-05 | 0.00288% | 0.0 | 1 | 0.00485  | 0.000904 | 0.000188 | 6.15e-05 | 0.00184%  |
| L624      | False | PBS-25       | 3.12e-05 | 0.00284% | 0.0 | 1 | 0.00612  | 0.00186  | 0.000355 | 3.88e-05 | 0.00117%  |
| L1112     | False | koll11       | 3.12e-05 | 0.00284% | 0.0 | 1 | 0.0253   | 0.0041   | 0.00398  | 2.48e-05 | 0.000744% |
| OTU_186   | True  | koll11       | 3.12e-05 | 0.00284% | 0.0 | 1 | 0.0219   | 0.00374  | 0.00248  | 2.45e-05 | 0.000735% |
| L1689     | False | OD1          | 3.07e-05 | 0.00279% | 0.0 | 1 | 0.00812  | 0.00137  | 0.000277 | 2.24e-05 | 0.000672% |
| L1677     | False | OD1          | 3.06e-05 | 0.00279% | 0.0 | 1 | 0.00342  | 0.000578 | 0.000289 | 6.28e-05 | 0.00188%  |
| L1827     | False | OD1          | 3.05e-05 | 0.00278% | 0.0 | 1 | 0.0134   | 0.00636  | 0.00152  | 7.77e-05 | 0.00233%  |
| L321      | False | OD1          | 3.04e-05 | 0.00277% | 0.0 | 1 | 0.0113   | 0.00192  | 0.000846 | 2.91e-05 | 0.000874% |
| L1027     | False | koll11       | 3.04e-05 | 0.00277% | 0.0 | 1 | 0.0441   | 0.00641  | 0.0141   | 2.8e-05  | 0.00084%  |
| L1259     | False | TM7-1        | 3.04e-05 | 0.00277% | 0.0 | 1 | 0.0102   | 0.00135  | 0.000289 | 8.52e-05 | 0.00256%  |
| L1720     | False | Mb-NB09      | 3.03e-05 | 0.00276% | 0.0 | 1 | 0.0065   | 0.00171  | 0.00076  | 7.03e-05 | 0.00211%  |
| OTU_242   | True  | PBS-25       | 3.02e-05 | 0.00275% | 0.0 | 1 | 0.0126   | 0.00123  | 0.000834 | 4.86e-05 | 0.00146%  |
| L1335     | False | ZB2          | 3.02e-05 | 0.00275% | 0.0 | 1 | 0.00344  | 0.000828 | 0.000267 | 4.14e-05 | 0.00124%  |
| L63       | False | ABY1         | 3.02e-05 | 0.00274% | 0.0 | 1 | 0.00431  | 0.0398   | 0.0173   | 9.43e-05 | 0.00283%  |

|           |       |         |          |          |     |   |          |          |          |          |           |
|-----------|-------|---------|----------|----------|-----|---|----------|----------|----------|----------|-----------|
| L192      | False | ABY1    | 3.01e-05 | 0.00274% | 0.0 | 1 | 0.0178   | 0.00554  | 0.00304  | 5.5e-05  | 0.00165%  |
| L97       | False | ABY1    | 3e-05    | 0.00273% | 0.0 | 1 | 0.0114   | 0.00236  | 0.000344 | 2.72e-05 | 0.000816% |
| OTU_229   | True  | koll11  | 2.97e-05 | 0.0027%  | 0.0 | 1 | 0.00773  | 0.00108  | 0.000381 | 5.76e-05 | 0.00173%  |
| OTU_7992  | True  | TM7-1   | 2.96e-05 | 0.0027%  | 0.0 | 1 | 2.45e-05 | 0.0103   | 0.00754  | 6.32e-05 | 0.0019%   |
| OTU_83    | True  | Mb-NB09 | 2.95e-05 | 0.00269% | 0.0 | 1 | 0.000562 | 0.000111 | 3.67e-05 | 7.12e-05 | 0.00214%  |
| OTU_6978  | True  | ZB2     | 2.94e-05 | 0.00268% | 0.0 | 1 | 0.00217  | 0.000205 | 2.37e-05 | 3.77e-05 | 0.00113%  |
| L816      | False | PBS-25  | 2.92e-05 | 0.00266% | 0.0 | 1 | 0.0227   | 0.00265  | 0.00186  | 2.41e-05 | 0.000724% |
| OTU_183   | True  | koll11  | 2.92e-05 | 0.00265% | 0.0 | 1 | 0.00758  | 0.00152  | 0.000571 | 6.17e-05 | 0.00185%  |
| L1287     | False | EW055   | 2.9e-05  | 0.00264% | 0.0 | 1 | 0.000344 | 9.06e-07 | 0.0127   | 8.15e-05 | 0.00244%  |
| L842      | False | OP3     | 2.87e-05 | 0.00261% | 0.0 | 1 | 0.0616   | 0.00686  | 0.00793  | 1.52e-05 | 0.000455% |
| L12       | False | OD1     | 2.86e-05 | 0.0026%  | 0.0 | 1 | 0.00155  | 0.000939 | 5.45e-06 | 0.000101 | 0.00304%  |
| L278      | False | ABY1    | 2.84e-05 | 0.00258% | 0.0 | 1 | 0.00308  | 0.00149  | 7.84e-05 | 7.49e-05 | 0.00225%  |
| L649      | False | koll11  | 2.83e-05 | 0.00258% | 0.0 | 1 | 0.0218   | 0.00395  | 0.0049   | 3.28e-05 | 0.000986% |
| OTU_7002  | True  | ZB2     | 2.82e-05 | 0.00256% | 0.0 | 1 | 0.00077  | 0.0      | 0.0      | 5.8e-05  | 0.00174%  |
| OTU_172   | True  | PBS-25  | 2.82e-05 | 0.00256% | 0.0 | 1 | 0.0125   | 0.00187  | 0.00787  | 0.000117 | 0.00351%  |
| L1561     | False | ZB2     | 2.81e-05 | 0.00256% | 0.0 | 1 | 0.00489  | 0.000523 | 0.000233 | 4.48e-05 | 0.00134%  |
| L822      | False | PBS-25  | 2.81e-05 | 0.00256% | 0.0 | 1 | 0.0216   | 0.00237  | 0.00186  | 2.32e-05 | 0.000696% |
| L1697     | False | Mb-NB09 | 2.81e-05 | 0.00256% | 0.0 | 1 | 0.000885 | 0.00015  | 4.37e-05 | 4.68e-05 | 0.00141%  |
| L347      | False | ABY1    | 2.79e-05 | 0.00254% | 0.0 | 1 | 0.00447  | 0.000692 | 0.000222 | 3.82e-05 | 0.00115%  |
| OTU_1080  | True  | koll11  | 2.79e-05 | 0.00254% | 0.0 | 1 | 0.00842  | 0.000176 | 0.000609 | 3.99e-05 | 0.0012%   |
| L30       | False | OD1     | 2.79e-05 | 0.00254% | 0.0 | 1 | 0.119    | 0.14     | 0.0781   | 0.000295 | 0.00886%  |
| L1536     | False | OD1     | 2.73e-05 | 0.00248% | 0.0 | 1 | 0.00393  | 0.000265 | 0.000547 | 4.27e-05 | 0.00128%  |
| OTU_1400  | True  | PBS-25  | 2.72e-05 | 0.00248% | 0.0 | 1 | 0.014    | 0.00127  | 0.00101  | 2.99e-05 | 0.000897% |
| L233      | False | ABY1    | 2.72e-05 | 0.00248% | 0.0 | 1 | 0.00487  | 0.00129  | 0.000246 | 6.75e-05 | 0.00202%  |
| L1413     | False | ZB2     | 2.69e-05 | 0.00245% | 0.0 | 1 | 0.000533 | 0.0245   | 0.0642   | 5.48e-05 | 0.00164%  |
| OTU_303   | True  | koll11  | 2.68e-05 | 0.00244% | 0.0 | 1 | 0.00936  | 0.00173  | 0.00159  | 4.8e-05  | 0.00144%  |
| L1110     | False | koll11  | 2.67e-05 | 0.00243% | 0.0 | 1 | 0.0352   | 0.00481  | 0.00527  | 1.3e-05  | 0.00039%  |
| L972      | False | koll11  | 2.66e-05 | 0.00242% | 0.0 | 1 | 0.186    | 0.0277   | 0.0362   | 9.58e-06 | 0.000288% |
| L1004     | False | koll11  | 2.64e-05 | 0.0024%  | 0.0 | 1 | 0.141    | 0.0202   | 0.0307   | 1.08e-05 | 0.000323% |
| L391      | False | ABY1    | 2.63e-05 | 0.0024%  | 0.0 | 1 | 0.00346  | 0.000153 | 0.000136 | 2.53e-05 | 0.000759% |
| L186      | False | SM2F11  | 2.63e-05 | 0.00239% | 0.0 | 1 | 0.00517  | 0.0011   | 0.000185 | 3.73e-05 | 0.00112%  |
| OTU_8054  | True  | ABY1    | 2.62e-05 | 0.00239% | 0.0 | 1 | 0.00128  | 0.000162 | 1.89e-05 | 6.07e-05 | 0.00182%  |
| OTU_633   | True  | koll11  | 2.6e-05  | 0.00237% | 0.0 | 1 | 0.0201   | 0.00197  | 0.00172  | 1.43e-05 | 0.00043%  |
| L32       | False | ABY1    | 2.58e-05 | 0.00235% | 0.0 | 1 | 0.00131  | 2.41e-05 | 1.78e-05 | 3.43e-05 | 0.00103%  |
| L1544     | False | ZB2     | 2.58e-05 | 0.00234% | 0.0 | 1 | 0.0217   | 0.00377  | 0.00179  | 2.59e-05 | 0.000779% |
| L1872     | False | OD1     | 2.56e-05 | 0.00233% | 0.0 | 1 | 0.00108  | 0.00135  | 5.3e-05  | 0.000108 | 0.00324%  |
| L1640     | False | ZB2     | 2.56e-05 | 0.00233% | 0.0 | 1 | 6.26e-06 | 0.0018   | 0.00199  | 0.000183 | 0.00549%  |
| L1806     | False | OD1     | 2.55e-05 | 0.00232% | 0.0 | 1 | 0.0122   | 0.00329  | 0.00048  | 3.83e-05 | 0.00115%  |
| OTU_5705  | True  | OD1     | 2.55e-05 | 0.00232% | 0.0 | 1 | 0.0105   | 0.0021   | 0.000981 | 4.69e-05 | 0.00141%  |
| OTU_180   | True  | koll11  | 2.54e-05 | 0.00232% | 0.0 | 1 | 0.00541  | 0.000699 | 0.000339 | 4.07e-05 | 0.00122%  |
| L815      | False | OP3     | 2.51e-05 | 0.00229% | 0.0 | 1 | 0.0238   | 0.00268  | 0.00186  | 1.87e-05 | 0.000561% |
| L424      | False | OP11    | 2.51e-05 | 0.00228% | 0.0 | 1 | 0.00231  | 0.000816 | 0.00336  | 0.000182 | 0.00547%  |
| L812      | False | PBS-25  | 2.49e-05 | 0.00227% | 0.0 | 1 | 0.0154   | 0.00195  | 0.0037   | 4.3e-05  | 0.00129%  |
| L333      | False | OD1     | 2.44e-05 | 0.00222% | 0.0 | 1 | 0.00147  | 0.000345 | 5.45e-05 | 4.96e-05 | 0.00149%  |
| L660      | False | koll11  | 2.42e-05 | 0.0022%  | 0.0 | 1 | 0.00367  | 0.000779 | 0.000478 | 5.71e-05 | 0.00171%  |
| OTU_6203  | True  | OD1     | 2.41e-05 | 0.0022%  | 0.0 | 1 | 5.84e-05 | 0.00862  | 0.00232  | 3.97e-05 | 0.00119%  |
| L845      | False | koll11  | 2.41e-05 | 0.00219% | 0.0 | 1 | 0.0309   | 0.00412  | 0.00542  | 2.5e-05  | 0.00075%  |
| L1167     | False | koll11  | 2.41e-05 | 0.00219% | 0.0 | 1 | 0.0106   | 0.00409  | 0.003    | 0.000103 | 0.00309%  |
| L1716     | False | Mb-NB09 | 2.39e-05 | 0.00218% | 0.0 | 1 | 0.00232  | 0.000602 | 8.96e-05 | 6.33e-05 | 0.0019%   |
| L1049     | False | koll11  | 2.36e-05 | 0.00215% | 0.0 | 1 | 0.00374  | 0.000575 | 3.23e-05 | 4e-05    | 0.0012%   |
| OTU_5994  | True  | ZB2     | 2.36e-05 | 0.00214% | 0.0 | 1 | 0.000403 | 0.0369   | 0.0185   | 6.8e-05  | 0.00204%  |
| OTU_85    | True  | OD1     | 2.33e-05 | 0.00212% | 0.0 | 1 | 0.000258 | 2.98e-05 | 0.0      | 6.78e-05 | 0.00204%  |
| L1097     | False | koll11  | 2.31e-05 | 0.0021%  | 0.0 | 1 | 0.00966  | 0.00172  | 0.00255  | 4.12e-05 | 0.00124%  |
| L1177     | False | koll11  | 2.31e-05 | 0.0021%  | 0.0 | 1 | 0.00868  | 0.00219  | 0.00101  | 3.89e-05 | 0.00117%  |
| OTU_9009  | True  | Mb-NB09 | 2.31e-05 | 0.0021%  | 0.0 | 1 | 0.000847 | 5.62e-06 | 2.1e-05  | 5.81e-05 | 0.00174%  |
| OTU_3932  | True  | SJA-4   | 2.29e-05 | 0.00209% | 0.0 | 1 | 0.00144  | 0.0      | 0.0      | 5.33e-05 | 0.0016%   |
| L1550     | False | ZB2     | 2.29e-05 | 0.00209% | 0.0 | 1 | 0.0187   | 0.00347  | 0.00167  | 2.67e-05 | 0.000802% |
| L1658     | False | OD1     | 2.29e-05 | 0.00209% | 0.0 | 1 | 0.00856  | 0.00316  | 0.00122  | 6.69e-05 | 0.00201%  |
| OTU_297   | True  | koll11  | 2.29e-05 | 0.00208% | 0.0 | 1 | 0.00756  | 0.000441 | 0.000215 | 4.18e-05 | 0.00125%  |
| OTU_8240  | True  | ABY1    | 2.28e-05 | 0.00208% | 0.0 | 1 | 0.00151  | 0.000241 | 0.000462 | 8.99e-05 | 0.0027%   |
| OTU_2037  | True  | koll11  | 2.28e-05 | 0.00207% | 0.0 | 1 | 0.00887  | 0.0012   | 0.000932 | 3.3e-05  | 0.00099%  |
| OTU_10762 | True  | OP11-4  | 2.27e-05 | 0.00207% | 0.0 | 1 | 0.00112  | 0.000204 | 1.44e-05 | 2.58e-05 | 0.000774% |
| L1712     | False | Mb-NB09 | 2.26e-05 | 0.00206% | 0.0 | 1 | 0.00333  | 0.000792 | 0.00014  | 4.48e-05 | 0.00134%  |
| L165      | False | ABY1    | 2.24e-05 | 0.00204% | 0.0 | 1 | 0.00511  | 0.000484 | 4.5e-05  | 4.13e-05 | 0.00124%  |
| L193      | False | ABY1    | 2.22e-05 | 0.00202% | 0.0 | 1 | 0.00628  | 0.00279  | 0.00181  | 9.6e-05  | 0.00288%  |



|          |       |          |          |          |     |   |          |          |          |          |           |
|----------|-------|----------|----------|----------|-----|---|----------|----------|----------|----------|-----------|
| L92      | False | ABY1     | 2.21e-05 | 0.00202% | 0.0 | 1 | 0.0197   | 0.0055   | 0.000976 | 1.92e-05 | 0.000578% |
| OTU_9036 | True  | Mb-NB09  | 2.18e-05 | 0.00198% | 0.0 | 1 | 0.000593 | 0.0      | 0.0      | 4.73e-05 | 0.00142%  |
| OTU_6056 | True  | ABY1     | 2.17e-05 | 0.00197% | 0.0 | 1 | 0.00458  | 0.000412 | 1.46e-05 | 4.38e-05 | 0.00131%  |
| OTU_8751 | True  | OD1      | 2.16e-05 | 0.00197% | 0.0 | 1 | 0.00308  | 0.000199 | 0.000588 | 4.04e-05 | 0.00121%  |
| L419     | False | Bacteria | 2.16e-05 | 0.00196% | 0.0 | 1 | 0.836    | 0.845    | 0.913    | 0.000164 | 0.00493%  |
| L64      | False | ABY1     | 2.15e-05 | 0.00196% | 0.0 | 1 | 0.0043   | 0.0381   | 0.0144   | 7.14e-05 | 0.00214%  |
| L1312    | False | OD1      | 2.14e-05 | 0.00195% | 0.0 | 1 | 0.000552 | 0.000107 | 0.0      | 5.26e-05 | 0.00158%  |
| OTU_6006 | True  | OD1      | 2.14e-05 | 0.00194% | 0.0 | 1 | 1.83e-05 | 0.0015   | 0.0      | 7.65e-05 | 0.0023%   |
| L29      | False | OD1      | 2.13e-05 | 0.00194% | 0.0 | 1 | 0.137    | 0.142    | 0.0791   | 0.00019  | 0.00571%  |
| L271     | False | OD1      | 2.13e-05 | 0.00193% | 0.0 | 1 | 0.00471  | 0.007    | 0.00301  | 0.000531 | 0.0159%   |
| OTU_258  | True  | koll11   | 2.12e-05 | 0.00193% | 0.0 | 1 | 0.00778  | 0.00194  | 0.000805 | 3.59e-05 | 0.00108%  |
| OTU_8031 | True  | ABY1     | 2.11e-05 | 0.00192% | 0.0 | 1 | 0.00406  | 0.00203  | 0.000331 | 5.32e-05 | 0.0016%   |
| OTU_62   | True  | ZB2      | 2.1e-05  | 0.00191% | 0.0 | 1 | 0.000179 | 0.0111   | 0.00605  | 0.000124 | 0.00371%  |
| L1514    | False | OD1      | 2.09e-05 | 0.00191% | 0.0 | 1 | 0.00236  | 0.000168 | 0.00102  | 9.07e-05 | 0.00272%  |
| OTU_8002 | True  | ABY1     | 2.07e-05 | 0.00189% | 0.0 | 1 | 0.00119  | 1.69e-05 | 1.49e-05 | 4.51e-05 | 0.00135%  |
| OTU_2281 | True  | koll11   | 2.06e-05 | 0.00188% | 0.0 | 1 | 0.00253  | 8.61e-05 | 0.000278 | 3.56e-05 | 0.00107%  |
| L1784    | False | OD1      | 2.06e-05 | 0.00188% | 0.0 | 1 | 0.00379  | 0.000639 | 0.000353 | 2.36e-05 | 0.000709% |
| OTU_689  | True  | koll11   | 2.05e-05 | 0.00187% | 0.0 | 1 | 0.0038   | 0.00104  | 0.000831 | 4.19e-05 | 0.00126%  |
| L528     | False | TM6      | 2.04e-05 | 0.00186% | 0.0 | 1 | 0.00643  | 0.00365  | 0.00278  | 0.000365 | 0.011%    |
| OTU_4160 | True  | GIF10    | 2.04e-05 | 0.00185% | 0.0 | 1 | 0.000693 | 3.56e-07 | 0.0      | 4.25e-05 | 0.00128%  |
| L248     | False | ABY1     | 2.03e-05 | 0.00185% | 0.0 | 1 | 0.00564  | 0.00137  | 0.000155 | 2.73e-05 | 0.000821% |
| L1690    | False | OD1      | 2.01e-05 | 0.00183% | 0.0 | 1 | 0.00467  | 0.00056  | 0.000137 | 1.19e-05 | 0.000357% |
| L856     | False | OP3      | 2.01e-05 | 0.00183% | 0.0 | 1 | 0.0205   | 0.00214  | 0.00181  | 1.12e-05 | 0.000335% |
| OTU_6723 | True  | OD1      | 2e-05    | 0.00182% | 0.0 | 1 | 6.32e-07 | 0.00104  | 0.00025  | 7.44e-05 | 0.00223%  |
| L1512    | False | OD1      | 1.99e-05 | 0.00182% | 0.0 | 1 | 0.00656  | 0.00145  | 0.00446  | 9.97e-05 | 0.00299%  |
| L1683    | False | Mb-NB09  | 1.99e-05 | 0.00181% | 0.0 | 1 | 0.00263  | 0.00082  | 5.39e-05 | 4.26e-05 | 0.00128%  |
| OTU_6014 | True  | SM2F11   | 1.99e-05 | 0.00181% | 0.0 | 1 | 0.00469  | 0.00101  | 0.000185 | 2.93e-05 | 0.00088%  |
| OTU_8175 | True  | TM7-3    | 1.99e-05 | 0.00181% | 0.0 | 1 | 1.5e-05  | 0.0      | 0.0103   | 5.02e-05 | 0.00151%  |
| L4       | False | ABY1     | 1.99e-05 | 0.00181% | 0.0 | 1 | 0.00224  | 0.000634 | 0.000127 | 3.36e-05 | 0.00101%  |
| OTU_49   | True  | OD1      | 1.98e-05 | 0.0018%  | 0.0 | 1 | 0.000262 | 1.92e-05 | 0.0      | 4.27e-05 | 0.00128%  |
| L141     | False | ABY1     | 1.97e-05 | 0.00179% | 0.0 | 1 | 0.00175  | 0.0154   | 0.00536  | 9e-05    | 0.0027%   |
| L1244    | False | TM7-1    | 1.96e-05 | 0.00179% | 0.0 | 1 | 0.0015   | 0.0106   | 0.0148   | 8.02e-05 | 0.00241%  |
| OTU_7054 | True  | ABY1     | 1.96e-05 | 0.00178% | 0.0 | 1 | 0.00326  | 0.000456 | 7.46e-05 | 2.59e-05 | 0.000776% |
| L175     | False | SM2F11   | 1.93e-05 | 0.00176% | 0.0 | 1 | 0.00161  | 0.000188 | 1.28e-05 | 2.89e-05 | 0.000867% |
| L1558    | False | ZB2      | 1.93e-05 | 0.00176% | 0.0 | 1 | 0.0133   | 0.00213  | 0.00112  | 2.08e-05 | 0.000624% |
| L403     | False | ABY1     | 1.93e-05 | 0.00175% | 0.0 | 1 | 0.0069   | 0.00283  | 0.000848 | 6.05e-05 | 0.00182%  |
| OTU_4910 | True  | OD1      | 1.92e-05 | 0.00175% | 0.0 | 1 | 0.000498 | 0.000218 | 0.000106 | 0.000167 | 0.00501%  |
| L1456    | False | ZB2      | 1.91e-05 | 0.00174% | 0.0 | 1 | 0.000338 | 0.00463  | 0.00735  | 3.88e-05 | 0.00116%  |
| OTU_6129 | True  | SM2F11   | 1.91e-05 | 0.00174% | 0.0 | 1 | 0.00253  | 0.000568 | 2.44e-05 | 3.79e-05 | 0.00114%  |
| L1261    | False | TM7-1    | 1.89e-05 | 0.00172% | 0.0 | 1 | 0.0102   | 0.000594 | 5.57e-05 | 3.93e-05 | 0.00118%  |
| L297     | False | ABY1     | 1.89e-05 | 0.00172% | 0.0 | 1 | 0.000892 | 0.00999  | 0.00688  | 5.51e-05 | 0.00165%  |
| L1336    | False | ZB2      | 1.89e-05 | 0.00172% | 0.0 | 1 | 0.00181  | 0.000132 | 9.32e-05 | 2.1e-05  | 0.000629% |
| L137     | False | OD1      | 1.89e-05 | 0.00172% | 0.0 | 1 | 0.008    | 0.0303   | 0.0164   | 0.00011  | 0.00329%  |
| L323     | False | OD1      | 1.87e-05 | 0.0017%  | 0.0 | 1 | 0.00479  | 0.000834 | 0.000142 | 2.11e-05 | 0.000633% |
| L94      | False | ABY1     | 1.87e-05 | 0.0017%  | 0.0 | 1 | 0.0151   | 0.0043   | 0.000578 | 1.88e-05 | 0.000563% |
| L1104    | False | koll11   | 1.86e-05 | 0.00169% | 0.0 | 1 | 0.00723  | 7.61e-05 | 0.000316 | 4.31e-05 | 0.00129%  |
| L725     | False | PBS-25   | 1.86e-05 | 0.00169% | 0.0 | 1 | 0.0277   | 0.00349  | 0.00486  | 2.83e-05 | 0.00085%  |
| OTU_3387 | True  | PBS-25   | 1.85e-05 | 0.00169% | 0.0 | 1 | 0.00163  | 0.0      | 0.0      | 5.16e-05 | 0.00155%  |
| L1790    | False | OD1      | 1.85e-05 | 0.00169% | 0.0 | 1 | 0.00291  | 0.000443 | 0.00028  | 1.93e-05 | 0.000579% |
| L58      | False | ABY1     | 1.85e-05 | 0.00168% | 0.0 | 1 | 0.00665  | 0.0407   | 0.0175   | 6.98e-05 | 0.0021%   |
| L322     | False | OD1      | 1.84e-05 | 0.00168% | 0.0 | 1 | 0.00485  | 0.000892 | 0.000149 | 2.13e-05 | 0.00064%  |
| OTU_8035 | True  | OD1      | 1.83e-05 | 0.00167% | 0.0 | 1 | 0.00144  | 0.000165 | 0.00038  | 8.32e-05 | 0.0025%   |
| OTU_6576 | True  | ZB2      | 1.83e-05 | 0.00166% | 0.0 | 1 | 0.000496 | 1.15e-05 | 0.0      | 2.66e-05 | 0.000799% |
| OTU_2093 | True  | GIF10    | 1.83e-05 | 0.00166% | 0.0 | 1 | 0.00261  | 0.000361 | 0.00011  | 3.85e-05 | 0.00116%  |
| L613     | False | BD4-9    | 1.82e-05 | 0.00166% | 0.0 | 1 | 0.000643 | 0.000132 | 0.0      | 5.5e-05  | 0.00165%  |
| L485     | False | OP11-4   | 1.82e-05 | 0.00166% | 0.0 | 1 | 0.00169  | 0.000156 | 1.33e-05 | 2.37e-05 | 0.000712% |
| OTU_5431 | True  | OD1      | 1.82e-05 | 0.00166% | 0.0 | 1 | 0.00055  | 2.4e-05  | 3.64e-06 | 3.57e-05 | 0.00107%  |
| OTU_8044 | True  | WCHB1    | 1.82e-05 | 0.00165% | 0.0 | 1 | 0.000531 | 1.53e-05 | 0.0      | 2.54e-05 | 0.000763% |
| L974     | False | koll11   | 1.81e-05 | 0.00165% | 0.0 | 1 | 0.00543  | 0.000817 | 0.000339 | 2.98e-05 | 0.000894% |
| L520     | False | OP11-3   | 1.8e-05  | 0.00164% | 0.0 | 1 | 0.00141  | 0.0      | 0.0      | 3.7e-05  | 0.00111%  |
| OTU_270  | True  | koll11   | 1.8e-05  | 0.00164% | 0.0 | 1 | 0.00125  | 1.74e-05 | 7.47e-06 | 2.9e-05  | 0.000871% |
| OTU_7950 | True  | ABY1     | 1.8e-05  | 0.00164% | 0.0 | 1 | 0.00112  | 0.000191 | 0.000133 | 5.48e-05 | 0.00164%  |
| L874     | False | koll11   | 1.8e-05  | 0.00163% | 0.0 | 1 | 0.0199   | 0.00567  | 0.00568  | 3.85e-05 | 0.00115%  |
| L1793    | False | OD1      | 1.8e-05  | 0.00163% | 0.0 | 1 | 0.00176  | 0.000404 | 0.00026  | 3.8e-05  | 0.00114%  |

|           |       |         |          |          |     |   |          |          |          |          |           |
|-----------|-------|---------|----------|----------|-----|---|----------|----------|----------|----------|-----------|
| OTU_423   | True  | PBS-25  | 1.79e-05 | 0.00163% | 0.0 | 1 | 0.0058   | 0.00185  | 0.000355 | 2.43e-05 | 0.000731% |
| OTU_9039  | True  | ABY1    | 1.79e-05 | 0.00163% | 0.0 | 1 | 0.00096  | 8.9e-06  | 2.8e-06  | 3.07e-05 | 0.000921% |
| L1365     | False | ZB2     | 1.78e-05 | 0.00162% | 0.0 | 1 | 2.03e-06 | 0.00133  | 0.0013   | 6.54e-05 | 0.00196%  |
| L1290     | False | TM7-3   | 1.76e-05 | 0.0016%  | 0.0 | 1 | 0.0099   | 0.000291 | 0.00271  | 6.16e-05 | 0.00185%  |
| OTU_949   | True  | koll11  | 1.76e-05 | 0.0016%  | 0.0 | 1 | 0.00466  | 0.000702 | 0.00014  | 2.72e-05 | 0.000816% |
| OTU_6683  | True  | ZB2     | 1.75e-05 | 0.00159% | 0.0 | 1 | 0.000959 | 0.000139 | 6.15e-05 | 4.57e-05 | 0.00137%  |
| OTU_36    | True  | PBS-25  | 1.75e-05 | 0.00159% | 0.0 | 1 | 0.00285  | 0.000163 | 0.000189 | 4.25e-05 | 0.00127%  |
| OTU_927   | True  | PRR-12  | 1.75e-05 | 0.00159% | 0.0 | 1 | 0.00168  | 3.93e-05 | 1.25e-05 | 2.24e-05 | 0.000672% |
| L1533     | False | OD1     | 1.74e-05 | 0.00159% | 0.0 | 1 | 3.42e-06 | 0.000367 | 0.000957 | 4.93e-05 | 0.00148%  |
| L992      | False | koll11  | 1.74e-05 | 0.00158% | 0.0 | 1 | 0.0103   | 0.00162  | 0.002    | 3.41e-05 | 0.00102%  |
| OTU_7898  | True  | ABY1    | 1.73e-05 | 0.00158% | 0.0 | 1 | 1.39e-05 | 0.00206  | 0.00203  | 6.61e-05 | 0.00198%  |
| L393      | False | ABY1    | 1.73e-05 | 0.00158% | 0.0 | 1 | 0.00322  | 0.000134 | 0.000136 | 1.66e-05 | 0.000497% |
| L1509     | False | OD1     | 1.72e-05 | 0.00157% | 0.0 | 1 | 0.00859  | 0.00246  | 0.00461  | 7.8e-05  | 0.00234%  |
| OTU_216   | True  | koll11  | 1.72e-05 | 0.00157% | 0.0 | 1 | 0.00864  | 0.00155  | 0.00232  | 3.67e-05 | 0.0011%   |
| OTU_8186  | True  | OD1     | 1.72e-05 | 0.00156% | 0.0 | 1 | 0.00169  | 7.06e-07 | 2.8e-06  | 3.82e-05 | 0.00115%  |
| L595      | False | PRR-12  | 1.71e-05 | 0.00156% | 0.0 | 1 | 0.00387  | 0.000242 | 9.13e-05 | 1.6e-05  | 0.00048%  |
| L5        | False | ABY1    | 1.69e-05 | 0.00154% | 0.0 | 1 | 0.000863 | 4.87e-05 | 0.000119 | 2.52e-05 | 0.000755% |
| OTU_7450  | True  | ABY1    | 1.69e-05 | 0.00154% | 0.0 | 1 | 0.00294  | 0.000573 | 0.000137 | 2.85e-05 | 0.000856% |
| L1146     | False | koll11  | 1.69e-05 | 0.00154% | 0.0 | 1 | 0.00825  | 0.000955 | 0.00105  | 4e-05    | 0.0012%   |
| OTU_8065  | True  | ABY1    | 1.68e-05 | 0.00153% | 0.0 | 1 | 3.16e-06 | 0.000535 | 0.0      | 4.38e-05 | 0.00132%  |
| OTU_214   | True  | PBS-25  | 1.68e-05 | 0.00153% | 0.0 | 1 | 0.00584  | 0.00088  | 0.00142  | 4.29e-05 | 0.00129%  |
| L1592     | False | OD1     | 1.68e-05 | 0.00153% | 0.0 | 1 | 0.00167  | 0.00918  | 0.00373  | 7.81e-05 | 0.00234%  |
| OTU_8251  | True  | Mb-NB09 | 1.67e-05 | 0.00152% | 0.0 | 1 | 0.00232  | 0.000444 | 7.99e-05 | 4.03e-05 | 0.00121%  |
| OTU_2374  | True  | koll11  | 1.67e-05 | 0.00152% | 0.0 | 1 | 0.000891 | 2.06e-06 | 4.88e-07 | 3.2e-05  | 0.000961% |
| L1511     | False | OD1     | 1.66e-05 | 0.00152% | 0.0 | 1 | 0.00859  | 0.00211  | 0.00454  | 6.66e-05 | 0.002%    |
| OTU_8134  | True  | ZB2     | 1.66e-05 | 0.00151% | 0.0 | 1 | 0.000484 | 0.0      | 0.0      | 3.48e-05 | 0.00104%  |
| L261      | False | OD1     | 1.66e-05 | 0.00151% | 0.0 | 1 | 0.0125   | 0.0117   | 0.00496  | 0.000164 | 0.00493%  |
| L1597     | False | OD1     | 1.66e-05 | 0.00151% | 0.0 | 1 | 0.000205 | 0.00872  | 0.00274  | 3.12e-05 | 0.000936% |
| L1771     | False | OD1     | 1.66e-05 | 0.00151% | 0.0 | 1 | 0.00133  | 0.000285 | 5.7e-05  | 4.5e-05  | 0.00135%  |
| L1798     | False | OD1     | 1.65e-05 | 0.0015%  | 0.0 | 1 | 0.0134   | 0.00331  | 0.00051  | 2.24e-05 | 0.000674% |
| L523      | False | OP11    | 1.65e-05 | 0.0015%  | 0.0 | 1 | 0.000827 | 0.000415 | 8.63e-06 | 6.67e-05 | 0.002%    |
| L1157     | False | koll11  | 1.64e-05 | 0.0015%  | 0.0 | 1 | 0.00606  | 0.000872 | 0.00466  | 9.22e-05 | 0.00277%  |
| OTU_10738 | True  | OP11-3  | 1.64e-05 | 0.00149% | 0.0 | 1 | 0.000411 | 7.06e-06 | 5.29e-07 | 4.02e-05 | 0.00121%  |
| OTU_6571  | True  | ZB2     | 1.64e-05 | 0.00149% | 0.0 | 1 | 0.00203  | 0.0      | 5.92e-05 | 2.31e-05 | 0.000693% |
| L76       | False | ABY1    | 1.64e-05 | 0.00149% | 0.0 | 1 | 0.00195  | 0.000689 | 6.24e-05 | 5.12e-05 | 0.00154%  |
| L405      | False | ABY1    | 1.64e-05 | 0.00149% | 0.0 | 1 | 0.00624  | 0.0023   | 0.000746 | 5.14e-05 | 0.00154%  |
| L482      | False | OP11-4  | 1.63e-05 | 0.00149% | 0.0 | 1 | 0.00921  | 0.00175  | 0.000739 | 1.41e-05 | 0.000423% |
| L1080     | False | koll11  | 1.63e-05 | 0.00149% | 0.0 | 1 | 0.0085   | 0.000739 | 0.000316 | 2.87e-05 | 0.00086%  |
| L1523     | False | ZB2     | 1.63e-05 | 0.00148% | 0.0 | 1 | 0.00191  | 0.000663 | 7.98e-05 | 3.68e-05 | 0.0011%   |
| OTU_7120  | True  | ABY1    | 1.62e-05 | 0.00147% | 0.0 | 1 | 0.00226  | 0.000889 | 9.59e-05 | 4.7e-05  | 0.00141%  |
| L99       | False | ABY1    | 1.61e-05 | 0.00147% | 0.0 | 1 | 0.00965  | 0.00166  | 0.000249 | 1.76e-05 | 0.000528% |
| OTU_6061  | True  | ZB2     | 1.61e-05 | 0.00146% | 0.0 | 1 | 2.54e-05 | 0.00154  | 9.63e-05 | 3.82e-05 | 0.00115%  |
| L1786     | False | OD1     | 1.6e-05  | 0.00146% | 0.0 | 1 | 0.0036   | 0.000443 | 0.000295 | 1.58e-05 | 0.000475% |
| L1018     | False | koll11  | 1.59e-05 | 0.00145% | 0.0 | 1 | 0.0119   | 0.00196  | 0.00183  | 3.1e-05  | 0.000931% |
| L1254     | False | TM7-1   | 1.59e-05 | 0.00145% | 0.0 | 1 | 0.000307 | 3.44e-06 | 0.00727  | 4.62e-05 | 0.00139%  |
| L1178     | False | koll11  | 1.59e-05 | 0.00145% | 0.0 | 1 | 0.00578  | 0.000586 | 0.000364 | 1.51e-05 | 0.000452% |
| L868      | False | koll11  | 1.58e-05 | 0.00144% | 0.0 | 1 | 0.0207   | 0.0057   | 0.00569  | 3.11e-05 | 0.000932% |
| L1662     | False | OD1     | 1.58e-05 | 0.00144% | 0.0 | 1 | 0.00967  | 0.00245  | 0.000611 | 2.45e-05 | 0.000737% |
| L864      | False | koll11  | 1.57e-05 | 0.00143% | 0.0 | 1 | 0.0212   | 0.00575  | 0.00584  | 2.92e-05 | 0.000876% |
| OTU_7263  | True  | ABY1    | 1.57e-05 | 0.00143% | 0.0 | 1 | 0.0035   | 0.000588 | 0.000155 | 1.39e-05 | 0.000416% |
| OTU_400   | True  | koll11  | 1.57e-05 | 0.00143% | 0.0 | 1 | 0.00145  | 0.000117 | 0.000248 | 4.77e-05 | 0.00143%  |
| L309      | False | ABY1    | 1.56e-05 | 0.00142% | 0.0 | 1 | 3.1e-05  | 0.0037   | 0.00312  | 2.78e-05 | 0.000835% |
| L59       | False | ABY1    | 1.56e-05 | 0.00142% | 0.0 | 1 | 0.00469  | 0.04     | 0.0174   | 5.02e-05 | 0.00151%  |
| L994      | False | koll11  | 1.56e-05 | 0.00142% | 0.0 | 1 | 0.0102   | 0.00161  | 0.00199  | 3.09e-05 | 0.000927% |
| OTU_261   | True  | koll11  | 1.54e-05 | 0.0014%  | 0.0 | 1 | 0.00135  | 0.000108 | 0.0      | 3.29e-05 | 0.000989% |
| L1865     | False | OD1     | 1.53e-05 | 0.00139% | 0.0 | 1 | 0.00142  | 0.000153 | 0.000152 | 2.09e-05 | 0.000628% |
| OTU_8038  | True  | ABY1    | 1.53e-05 | 0.00139% | 0.0 | 1 | 0.000825 | 6.38e-06 | 1.05e-06 | 3.04e-05 | 0.000912% |
| L1117     | False | koll11  | 1.52e-05 | 0.00139% | 0.0 | 1 | 0.00545  | 0.00041  | 0.00094  | 1.68e-05 | 0.000506% |
| L1528     | False | OD1     | 1.52e-05 | 0.00138% | 0.0 | 1 | 0.00477  | 0.000976 | 0.00166  | 4.07e-05 | 0.00122%  |
| L1111     | False | koll11  | 1.52e-05 | 0.00138% | 0.0 | 1 | 0.0308   | 0.00451  | 0.00492  | 8.13e-06 | 0.000244% |
| L174      | False | SM2F11  | 1.51e-05 | 0.00137% | 0.0 | 1 | 0.00211  | 0.000415 | 0.000198 | 2.5e-05  | 0.00075%  |
| L730      | False | PBS-25  | 1.5e-05  | 0.00137% | 0.0 | 1 | 0.0071   | 0.000872 | 0.00263  | 5.43e-05 | 0.00163%  |
| L1714     | False | Mb-NB09 | 1.5e-05  | 0.00137% | 0.0 | 1 | 0.0028   | 0.000608 | 0.000108 | 3.17e-05 | 0.000951% |
| L211      | False | ABY1    | 1.5e-05  | 0.00136% | 0.0 | 1 | 0.00104  | 8.14e-06 | 1.77e-05 | 2.41e-05 | 0.000725% |
| L851      | False | koll11  | 1.49e-05 | 0.00136% | 0.0 | 1 | 0.0216   | 0.00298  | 0.00169  | 1.02e-05 | 0.000306% |

|           |       |                |          |          |     |   |          |          |          |          |           |
|-----------|-------|----------------|----------|----------|-----|---|----------|----------|----------|----------|-----------|
| L1572     | False | ZB2            | 1.49e-05 | 0.00136% | 0.0 | 1 | 0.00163  | 0.00033  | 0.00048  | 4.87e-05 | 0.00146%  |
| L1056     | False | koll11         | 1.49e-05 | 0.00136% | 0.0 | 1 | 0.00362  | 0.000407 | 0.00059  | 2.65e-05 | 0.000796% |
| L96       | False | ABY1           | 1.48e-05 | 0.00135% | 0.0 | 1 | 0.0123   | 0.00262  | 0.000419 | 1.27e-05 | 0.000382% |
| OTU_358   | True  | koll11         | 1.48e-05 | 0.00135% | 0.0 | 1 | 0.00123  | 6.38e-05 | 0.000534 | 5.81e-05 | 0.00174%  |
| L1836     | False | OD1            | 1.48e-05 | 0.00134% | 0.0 | 1 | 0.00193  | 0.000563 | 0.000673 | 0.000123 | 0.00369%  |
| L308      | False | ABY1           | 1.48e-05 | 0.00134% | 0.0 | 1 | 3.54e-05 | 0.00392  | 0.00334  | 2.7e-05  | 0.00081%  |
| L262      | False | OD1            | 1.47e-05 | 0.00134% | 0.0 | 1 | 0.00776  | 0.00371  | 0.0017   | 5.54e-05 | 0.00166%  |
| OTU_8776  | True  | Mb-NB09        | 1.47e-05 | 0.00134% | 0.0 | 1 | 0.00242  | 0.00072  | 2.35e-05 | 3.28e-05 | 0.000986% |
| L535      | False | SBRH58         | 1.47e-05 | 0.00134% | 0.0 | 1 | 0.00138  | 0.000314 | 9.14e-05 | 5.82e-05 | 0.00175%  |
| OTU_7995  | True  | ABY1           | 1.47e-05 | 0.00133% | 0.0 | 1 | 6.32e-07 | 0.000326 | 0.00117  | 5.5e-05  | 0.00165%  |
| L183      | False | SM2F11         | 1.46e-05 | 0.00133% | 0.0 | 1 | 0.00793  | 0.00167  | 0.000235 | 1.29e-05 | 0.000386% |
| OTU_32    | True  | Mb-NB09        | 1.46e-05 | 0.00133% | 0.0 | 1 | 0.000323 | 3.89e-05 | 7e-06    | 3.17e-05 | 0.000951% |
| L1692     | False | OD1            | 1.44e-05 | 0.00131% | 0.0 | 1 | 0.00321  | 0.000401 | 8.26e-05 | 1.14e-05 | 0.000342% |
| OTU_6635  | True  | OD1            | 1.44e-05 | 0.00131% | 0.0 | 1 | 0.00075  | 4.43e-06 | 2.97e-06 | 1.66e-05 | 0.000497% |
| L116      | False | OD1            | 1.44e-05 | 0.00131% | 0.0 | 1 | 0.0134   | 0.0409   | 0.0242   | 7.74e-05 | 0.00232%  |
| L483      | False | OP11-4         | 1.44e-05 | 0.00131% | 0.0 | 1 | 0.0019   | 0.000225 | 1.57e-05 | 1.9e-05  | 0.000569% |
| OTU_7179  | True  | OD1            | 1.43e-05 | 0.0013%  | 0.0 | 1 | 0.000374 | 0.000216 | 0.0      | 7.3e-05  | 0.00219%  |
| L1778     | False | OD1            | 1.43e-05 | 0.0013%  | 0.0 | 1 | 0.000869 | 4.43e-06 | 2.97e-06 | 1.33e-05 | 0.000399% |
| OTU_9001  | True  | ABY1           | 1.43e-05 | 0.0013%  | 0.0 | 1 | 0.000974 | 3.77e-05 | 1.38e-05 | 3.24e-05 | 0.000972% |
| OTU_6780  | True  | ZB2            | 1.42e-05 | 0.0013%  | 0.0 | 1 | 0.0042   | 0.00128  | 0.00345  | 0.00012  | 0.00361%  |
| L1306     | False | OD1            | 1.42e-05 | 0.00129% | 0.0 | 1 | 0.00603  | 0.000526 | 0.000664 | 2.05e-05 | 0.000615% |
| OTU_10749 | True  | OP11-4         | 1.41e-05 | 0.00129% | 0.0 | 1 | 0.0127   | 0.00319  | 0.00164  | 3.98e-05 | 0.00119%  |
| L1356     | False | ZB2            | 1.4e-05  | 0.00128% | 0.0 | 1 | 0.00115  | 0.000128 | 7.77e-06 | 2.51e-05 | 0.000753% |
| L1463     | False | ZB2            | 1.39e-05 | 0.00126% | 0.0 | 1 | 0.000276 | 0.00386  | 0.0055   | 3.08e-05 | 0.000923% |
| L80       | False | OD1            | 1.38e-05 | 0.00126% | 0.0 | 1 | 0.0358   | 0.0501   | 0.0264   | 0.000159 | 0.00477%  |
| L1457     | False | ZB2            | 1.38e-05 | 0.00125% | 0.0 | 1 | 0.0      | 0.000234 | 0.00185  | 3.44e-05 | 0.00103%  |
| L1125     | False | koll11         | 1.38e-05 | 0.00125% | 0.0 | 1 | 0.00299  | 0.000183 | 9.89e-05 | 2.4e-05  | 0.000721% |
| L514      | False | OP11-3         | 1.37e-05 | 0.00125% | 0.0 | 1 | 0.00211  | 0.000407 | 5.68e-05 | 4.03e-05 | 0.00121%  |
| L346      | False | ABY1           | 1.37e-05 | 0.00124% | 0.0 | 1 | 0.00598  | 0.000934 | 0.000684 | 2.25e-05 | 0.000675% |
| L489      | False | OP11-4         | 1.36e-05 | 0.00124% | 0.0 | 1 | 0.0059   | 0.00116  | 0.000652 | 2.22e-05 | 0.000667% |
| L226      | False | ABY1           | 1.36e-05 | 0.00124% | 0.0 | 1 | 0.00105  | 7.76e-05 | 0.0      | 2.82e-05 | 0.000846% |
| L251      | False | ABY1           | 1.35e-05 | 0.00123% | 0.0 | 1 | 0.00477  | 0.00121  | 0.000155 | 2.29e-05 | 0.000687% |
| OTU_7952  | True  | ABY1           | 1.35e-05 | 0.00123% | 0.0 | 1 | 0.000662 | 0.0      | 7.1e-07  | 2.16e-05 | 0.000648% |
| L1684     | False | Mb-NB09        | 1.35e-05 | 0.00123% | 0.0 | 1 | 0.0025   | 0.00072  | 2.94e-05 | 2.86e-05 | 0.000859% |
| OTU_994   | True  | [Acetothermia] | 1.34e-05 | 0.00122% | 0.0 | 1 | 0.000346 | 0.0      | 0.0      | 3.44e-05 | 0.00103%  |
| L129      | False | ABY1           | 1.34e-05 | 0.00122% | 0.0 | 1 | 0.00137  | 0.000162 | 1.89e-05 | 2.8e-05  | 0.00084%  |
| L737      | False | PBS-25         | 1.33e-05 | 0.00121% | 0.0 | 1 | 0.0147   | 0.00141  | 0.00181  | 2.35e-05 | 0.000704% |
| L1197     | False | koll11         | 1.33e-05 | 0.00121% | 0.0 | 1 | 0.00197  | 0.0009   | 0.000184 | 4.21e-05 | 0.00126%  |
| OTU_8074  | True  | ABY1           | 1.32e-05 | 0.0012%  | 0.0 | 1 | 0.000111 | 0.00236  | 0.00212  | 4.32e-05 | 0.0013%   |
| OTU_567   | True  | koll11         | 1.32e-05 | 0.0012%  | 0.0 | 1 | 0.00102  | 2.62e-05 | 0.0      | 2.72e-05 | 0.000816% |
| L444      | False | OP11-4         | 1.31e-05 | 0.0012%  | 0.0 | 1 | 0.00131  | 0.00017  | 0.00102  | 7.51e-05 | 0.00225%  |
| OTU_8250  | True  | ABY1           | 1.31e-05 | 0.00119% | 0.0 | 1 | 0.00151  | 0.000689 | 6.24e-05 | 5.02e-05 | 0.00151%  |
| L1857     | False | OD1            | 1.31e-05 | 0.00119% | 0.0 | 1 | 0.000525 | 2.05e-05 | 1.85e-05 | 1.97e-05 | 0.00059%  |
| OTU_419   | True  | koll11         | 1.3e-05  | 0.00119% | 0.0 | 1 | 0.00112  | 1.5e-05  | 0.0      | 2.43e-05 | 0.000728% |
| OTU_6177  | True  | OD1            | 1.3e-05  | 0.00118% | 0.0 | 1 | 0.000576 | 0.000145 | 0.0      | 2.67e-05 | 0.000801% |
| OTU_7223  | True  | ABY1           | 1.29e-05 | 0.00118% | 0.0 | 1 | 0.000646 | 0.000495 | 7.6e-06  | 3.68e-05 | 0.0011%   |
| L79       | False | OD1            | 1.29e-05 | 0.00118% | 0.0 | 1 | 0.0358   | 0.0521   | 0.0284   | 0.000156 | 0.00467%  |
| OTU_7045  | True  | ABY1           | 1.29e-05 | 0.00117% | 0.0 | 1 | 6.13e-05 | 0.0151   | 0.00517  | 3.26e-05 | 0.00098%  |
| L264      | False | OD1            | 1.29e-05 | 0.00117% | 0.0 | 1 | 0.0037   | 0.00167  | 0.00137  | 0.000116 | 0.00349%  |
| L101      | False | ABY1           | 1.29e-05 | 0.00117% | 0.0 | 1 | 0.00914  | 0.0014   | 0.000244 | 1.37e-05 | 0.000412% |
| OTU_6084  | True  | ZB2            | 1.27e-05 | 0.00116% | 0.0 | 1 | 3.26e-05 | 0.0034   | 0.00132  | 3.45e-05 | 0.00104%  |
| OTU_6663  | True  | ZB2            | 1.27e-05 | 0.00116% | 0.0 | 1 | 0.00171  | 0.00144  | 7.1e-05  | 6.22e-05 | 0.00187%  |
| OTU_2490  | True  | koll11         | 1.27e-05 | 0.00116% | 0.0 | 1 | 0.00519  | 0.000408 | 0.00285  | 5.79e-05 | 0.00174%  |
| L802      | False | OP3            | 1.26e-05 | 0.00115% | 0.0 | 1 | 0.0517   | 0.00638  | 0.00815  | 9.68e-06 | 0.00029%  |
| L370      | False | OD1            | 1.26e-05 | 0.00115% | 0.0 | 1 | 0.00185  | 0.000261 | 0.000307 | 2.92e-05 | 0.000877% |
| L995      | False | koll11         | 1.26e-05 | 0.00115% | 0.0 | 1 | 0.00827  | 0.00157  | 0.00197  | 3.01e-05 | 0.000904% |
| OTU_6502  | True  | WCHB1-64       | 1.25e-05 | 0.00114% | 0.0 | 1 | 3.29e-05 | 0.000317 | 0.000965 | 4.58e-05 | 0.00138%  |
| OTU_2352  | True  | SJA-4          | 1.25e-05 | 0.00114% | 0.0 | 1 | 0.0007   | 0.0      | 0.0      | 2.57e-05 | 0.000772% |
| OTU_10764 | True  | OP11-4         | 1.24e-05 | 0.00113% | 0.0 | 1 | 0.0045   | 0.000969 | 0.000471 | 2.59e-05 | 0.000776% |
| OTU_9054  | True  | ABY1           | 1.24e-05 | 0.00113% | 0.0 | 1 | 0.000195 | 0.0      | 0.000704 | 5.98e-05 | 0.0018%   |
| OTU_6086  | True  | ZB2            | 1.24e-05 | 0.00112% | 0.0 | 1 | 0.000591 | 8.86e-06 | 1.57e-05 | 2.71e-05 | 0.000814% |
| OTU_6232  | True  | ZB2            | 1.23e-05 | 0.00112% | 0.0 | 1 | 6.96e-05 | 0.000973 | 0.00415  | 4.31e-05 | 0.00129%  |
| L1862     | False | OD1            | 1.23e-05 | 0.00112% | 0.0 | 1 | 0.00258  | 0.0015   | 0.000205 | 3.16e-05 | 0.000948% |
| OTU_5846  | True  | OD1            | 1.23e-05 | 0.00112% | 0.0 | 1 | 0.0      | 0.000868 | 0.0      | 3.72e-05 | 0.00112%  |
| L531      | False | TM6            | 1.22e-05 | 0.00111% | 0.0 | 1 | 0.000164 | 0.00191  | 0.000134 | 6.72e-05 | 0.00202%  |

|          |       |                |          |           |     |   |          |          |          |          |           |
|----------|-------|----------------|----------|-----------|-----|---|----------|----------|----------|----------|-----------|
| OTU_8007 | True  | ABY1           | 1.21e-05 | 0.0011%   | 0.0 | 1 | 0.000849 | 1.01e-05 | 0.0      | 2.65e-05 | 0.000794% |
| L1019    | False | koll11         | 1.21e-05 | 0.0011%   | 0.0 | 1 | 0.00803  | 0.00111  | 0.000381 | 2.21e-05 | 0.000662% |
| L136     | False | OD1            | 1.2e-05  | 0.00109%  | 0.0 | 1 | 0.00807  | 0.0303   | 0.0164   | 7.05e-05 | 0.00211%  |
| OTU_5425 | True  | OD1            | 1.19e-05 | 0.00108%  | 0.0 | 1 | 0.00196  | 0.000254 | 2.48e-05 | 1.61e-05 | 0.000484% |
| OTU_7967 | True  | ABY1           | 1.19e-05 | 0.00108%  | 0.0 | 1 | 0.00247  | 0.00148  | 2.85e-05 | 3.99e-05 | 0.0012%   |
| OTU_7951 | True  | ABY1           | 1.19e-05 | 0.00108%  | 0.0 | 1 | 0.00113  | 0.000779 | 0.0      | 5.33e-05 | 0.0016%   |
| OTU_1554 | True  | PBS-25         | 1.18e-05 | 0.00108%  | 0.0 | 1 | 0.000837 | 0.0      | 0.0      | 1.55e-05 | 0.000465% |
| L1696    | False | Mb-NB09        | 1.18e-05 | 0.00107%  | 0.0 | 1 | 0.000955 | 0.000151 | 4.65e-05 | 1.87e-05 | 0.000562% |
| L991     | False | koll11         | 1.18e-05 | 0.00107%  | 0.0 | 1 | 0.0119   | 0.00216  | 0.0028   | 2.21e-05 | 0.000663% |
| L1147    | False | koll11         | 1.18e-05 | 0.00107%  | 0.0 | 1 | 0.00754  | 0.000664 | 0.0009   | 2.81e-05 | 0.000843% |
| L417     | False | Bacteria       | 1.17e-05 | 0.00107%  | 0.0 | 1 | 0.837    | 0.845    | 0.913    | 8.98e-05 | 0.00269%  |
| OTU_7990 | True  | ABY1           | 1.17e-05 | 0.00107%  | 0.0 | 1 | 0.000735 | 9.02e-05 | 0.0      | 2.4e-05  | 0.000719% |
| OTU_4950 | True  | [Acetothermia] | 1.17e-05 | 0.00107%  | 0.0 | 1 | 0.00035  | 2.53e-05 | 0.0      | 2.51e-05 | 0.000753% |
| L1856    | False | OD1            | 1.17e-05 | 0.00106%  | 0.0 | 1 | 0.00311  | 0.00152  | 0.000224 | 2.37e-05 | 0.000711% |
| L1824    | False | OD1            | 1.16e-05 | 0.00106%  | 0.0 | 1 | 0.00121  | 0.000196 | 0.000159 | 4.02e-05 | 0.00121%  |
| L1084    | False | koll11         | 1.15e-05 | 0.00105%  | 0.0 | 1 | 0.00813  | 0.000691 | 0.000283 | 2.08e-05 | 0.000625% |
| L1629    | False | ZB2            | 1.15e-05 | 0.00104%  | 0.0 | 1 | 0.00444  | 0.00259  | 0.00139  | 0.000111 | 0.00332%  |
| L1892    | False | OD1            | 1.15e-05 | 0.00104%  | 0.0 | 1 | 0.00207  | 0.000738 | 0.00015  | 2.82e-05 | 0.000845% |
| L1611    | False | ZB2            | 1.14e-05 | 0.00104%  | 0.0 | 1 | 0.00169  | 9.1e-05  | 8.5e-05  | 1.54e-05 | 0.000463% |
| OTU_7373 | True  | OD1            | 1.13e-05 | 0.00103%  | 0.0 | 1 | 0.000859 | 0.000297 | 0.000228 | 6.2e-05  | 0.00186%  |
| L380     | False | OD1            | 1.13e-05 | 0.00103%  | 0.0 | 1 | 0.000845 | 3.53e-05 | 7.74e-05 | 2.31e-05 | 0.000694% |
| OTU_323  | True  | koll11         | 1.11e-05 | 0.00101%  | 0.0 | 1 | 0.00147  | 0.000133 | 3.25e-05 | 2.02e-05 | 0.000606% |
| L877     | False | koll11         | 1.11e-05 | 0.00101%  | 0.0 | 1 | 0.0198   | 0.00479  | 0.00566  | 2.05e-05 | 0.000616% |
| L1502    | False | ZB2            | 1.09e-05 | 0.000994% | 0.0 | 1 | 0.000183 | 0.00103  | 3.27e-05 | 4.76e-05 | 0.00143%  |
| OTU_292  | True  | PBS-25         | 1.09e-05 | 0.000992% | 0.0 | 1 | 0.00657  | 0.000653 | 0.000654 | 2.07e-05 | 0.00062%  |
| OTU_6667 | True  | ABY1           | 1.09e-05 | 0.00099%  | 0.0 | 1 | 0.000245 | 0.0312   | 0.00884  | 2.24e-05 | 0.000671% |
| L1894    | False | OD1            | 1.09e-05 | 0.000989% | 0.0 | 1 | 0.00192  | 0.000688 | 0.000136 | 2.74e-05 | 0.000821% |
| L1245    | False | TM7-1          | 1.08e-05 | 0.000979% | 0.0 | 1 | 0.000896 | 0.0105   | 0.00755  | 3.69e-05 | 0.00111%  |
| L1012    | False | koll11         | 1.08e-05 | 0.000979% | 0.0 | 1 | 0.0347   | 0.00644  | 0.00654  | 1.1e-05  | 0.00033%  |
| OTU_6170 | True  | ZB2            | 1.07e-05 | 0.000977% | 0.0 | 1 | 0.000641 | 5.1e-05  | 0.0      | 1.84e-05 | 0.000552% |
| L714     | False | PBS-25         | 1.07e-05 | 0.00097%  | 0.0 | 1 | 0.0127   | 0.00187  | 0.00787  | 4.37e-05 | 0.00131%  |
| OTU_1087 | True  | OP3            | 1.06e-05 | 0.000968% | 0.0 | 1 | 0.000462 | 0.0      | 3.89e-06 | 2.05e-05 | 0.000615% |
| L126     | False | OD1            | 1.06e-05 | 0.000967% | 0.0 | 1 | 0.0124   | 0.0311   | 0.0167   | 0.000103 | 0.0031%   |
| OTU_9123 | True  | ABY1           | 1.06e-05 | 0.000965% | 0.0 | 1 | 0.00174  | 0.000229 | 1.96e-05 | 4.37e-05 | 0.00131%  |
| OTU_8179 | True  | EW055          | 1.05e-05 | 0.000954% | 0.0 | 1 | 0.000341 | 9.06e-07 | 0.0124   | 2.95e-05 | 0.000885% |
| L589     | False | PRR-12         | 1.04e-05 | 0.000948% | 0.0 | 1 | 0.01     | 0.00137  | 0.000637 | 1.32e-05 | 0.000397% |
| L607     | False | PRR-12         | 1.04e-05 | 0.000944% | 0.0 | 1 | 0.00298  | 0.000341 | 2.96e-06 | 1.74e-05 | 0.000523% |
| L119     | False | ABY1           | 1.04e-05 | 0.000943% | 0.0 | 1 | 0.00101  | 0.00948  | 0.00624  | 4.18e-05 | 0.00125%  |
| L1238    | False | TM7            | 1.03e-05 | 0.000934% | 0.0 | 1 | 0.0131   | 0.0122   | 0.021    | 0.000412 | 0.0124%   |
| L1591    | False | OD1            | 1.02e-05 | 0.000932% | 0.0 | 1 | 0.00167  | 0.00918  | 0.00397  | 4.86e-05 | 0.00146%  |
| L961     | False | koll11         | 1.02e-05 | 0.00093%  | 0.0 | 1 | 0.0244   | 0.00282  | 0.00183  | 1.01e-05 | 0.000304% |
| OTU_205  | True  | koll11         | 1.02e-05 | 0.000925% | 0.0 | 1 | 0.00578  | 0.000965 | 0.000283 | 1.39e-05 | 0.000417% |
| OTU_327  | True  | koll11         | 1.01e-05 | 0.000923% | 0.0 | 1 | 0.00116  | 5.37e-05 | 0.0      | 2e-05    | 0.000601% |
| OTU_8135 | True  | EW055          | 1.01e-05 | 0.000917% | 0.0 | 1 | 0.00202  | 0.000186 | 0.0      | 3.1e-05  | 0.000929% |
| OTU_259  | True  | PBS-25         | 1e-05    | 0.000912% | 0.0 | 1 | 0.00543  | 0.000569 | 0.000748 | 2.28e-05 | 0.000684% |
| OTU_7164 | True  | ABY1           | 1e-05    | 0.000912% | 0.0 | 1 | 0.000251 | 0.0      | 0.0      | 2.56e-05 | 0.000769% |
| OTU_8072 | True  | ABY1           | 9.99e-06 | 0.00091%  | 0.0 | 1 | 0.000657 | 0.000534 | 0.000102 | 7.75e-05 | 0.00233%  |
| OTU_8948 | True  | TM7            | 9.98e-06 | 0.000909% | 0.0 | 1 | 0.000549 | 6.72e-05 | 2.84e-05 | 3.02e-05 | 0.000906% |
| L1905    | False | OD1            | 9.95e-06 | 0.000906% | 0.0 | 1 | 0.0012   | 9.83e-05 | 8.77e-06 | 1.27e-05 | 0.000382% |
| L326     | False | ABY1           | 9.93e-06 | 0.000904% | 0.0 | 1 | 0.000947 | 0.000362 | 8.68e-05 | 4.12e-05 | 0.00124%  |
| L1472    | False | ZB2            | 9.91e-06 | 0.000902% | 0.0 | 1 | 0.00423  | 0.00172  | 0.000902 | 3.3e-05  | 0.00099%  |
| L274     | False | ABY1           | 9.89e-06 | 0.0009%   | 0.0 | 1 | 0.000183 | 0.0017   | 0.00103  | 4.86e-05 | 0.00146%  |
| L752     | False | PBS-25         | 9.85e-06 | 0.000897% | 0.0 | 1 | 0.00663  | 0.000457 | 0.0025   | 2.68e-05 | 0.000803% |
| OTU_201  | True  | OD1            | 9.78e-06 | 0.00089%  | 0.0 | 1 | 0.00023  | 0.0      | 6.91e-06 | 2.25e-05 | 0.000674% |
| OTU_6073 | True  | ZB2            | 9.74e-06 | 0.000886% | 0.0 | 1 | 5.9e-05  | 0.00487  | 0.00399  | 5.55e-05 | 0.00167%  |
| OTU_5635 | True  | OD1            | 9.74e-06 | 0.000886% | 0.0 | 1 | 0.000331 | 0.0      | 3.85e-06 | 2.08e-05 | 0.000624% |
| OTU_409  | True  | koll11         | 9.73e-06 | 0.000886% | 0.0 | 1 | 0.00115  | 2.48e-05 | 0.0      | 2.3e-05  | 0.00069%  |
| L1352    | False | OD1            | 9.72e-06 | 0.000885% | 0.0 | 1 | 0.00277  | 0.00146  | 0.000925 | 0.000105 | 0.00316%  |
| L437     | False | OP11           | 9.69e-06 | 0.000882% | 0.0 | 1 | 0.0008   | 1.58e-05 | 0.0      | 1.08e-05 | 0.000324% |
| L654     | False | koll11         | 9.64e-06 | 0.000877% | 0.0 | 1 | 0.0207   | 0.00312  | 0.00473  | 9.87e-06 | 0.000296% |
| L1838    | False | OD1            | 9.61e-06 | 0.000875% | 0.0 | 1 | 0.00184  | 0.000545 | 0.000276 | 5.11e-05 | 0.00153%  |
| L1044    | False | koll11         | 9.61e-06 | 0.000874% | 0.0 | 1 | 0.0131   | 0.00219  | 0.00636  | 3.03e-05 | 0.000908% |
| L1608    | False | ZB2            | 9.6e-06  | 0.000874% | 0.0 | 1 | 0.00232  | 0.000218 | 0.000194 | 1.36e-05 | 0.000408% |
| OTU_437  | True  | PBS-25         | 9.57e-06 | 0.000872% | 0.0 | 1 | 0.000988 | 0.0      | 1.4e-05  | 1.98e-05 | 0.000593% |

|           |       |         |          |           |     |   |          |          |          |          |           |
|-----------|-------|---------|----------|-----------|-----|---|----------|----------|----------|----------|-----------|
| OTU_10801 | True  | OP11-4  | 9.52e-06 | 0.000866% | 0.0 | 1 | 0.0014   | 0.00019  | 0.000181 | 1.67e-05 | 0.000502% |
| L328      | False | ABY1    | 9.51e-06 | 0.000866% | 0.0 | 1 | 0.000947 | 0.000133 | 8.13e-05 | 2.25e-05 | 0.000677% |
| OTU_2622  | True  | SJA-4   | 9.45e-06 | 0.00086%  | 0.0 | 1 | 0.0      | 0.0      | 0.000762 | 2.44e-05 | 0.000732% |
| L979      | False | koll11  | 9.45e-06 | 0.00086%  | 0.0 | 1 | 0.00336  | 0.000681 | 0.000447 | 2.02e-05 | 0.000605% |
| OTU_7941  | True  | ABY1    | 9.42e-06 | 0.000857% | 0.0 | 1 | 0.000849 | 1.11e-05 | 2.91e-05 | 1.41e-05 | 0.000423% |
| L1037     | False | koll11  | 9.41e-06 | 0.000857% | 0.0 | 1 | 0.00833  | 0.00134  | 0.00481  | 3e-05    | 0.0009%   |
| L862      | False | koll11  | 9.41e-06 | 0.000856% | 0.0 | 1 | 0.0259   | 0.00645  | 0.00598  | 1.22e-05 | 0.000366% |
| OTU_8016  | True  | TM7-3   | 9.34e-06 | 0.00085%  | 0.0 | 1 | 0.0      | 2.57e-05 | 0.000628 | 2.81e-05 | 0.000844% |
| OTU_7840  | True  | ABY1    | 9.32e-06 | 0.000849% | 0.0 | 1 | 0.00215  | 0.000177 | 0.000122 | 1.65e-05 | 0.000494% |
| OTU_8182  | True  | EW055   | 9.3e-06  | 0.000846% | 0.0 | 1 | 0.0      | 0.0      | 0.00262  | 2.37e-05 | 0.000712% |
| L1262     | False | TM7-1   | 9.28e-06 | 0.000845% | 0.0 | 1 | 0.00204  | 0.000594 | 5.57e-05 | 1.96e-05 | 0.000589% |
| L854      | False | OP3     | 9.25e-06 | 0.000842% | 0.0 | 1 | 0.0223   | 0.00257  | 0.0019   | 4.93e-06 | 0.000148% |
| OTU_12    | True  | ZB2     | 9.24e-06 | 0.000841% | 0.0 | 1 | 0.00132  | 0.000136 | 0.000109 | 1.16e-05 | 0.000347% |
| OTU_276   | True  | koll11  | 9.2e-06  | 0.000837% | 0.0 | 1 | 0.00221  | 0.000101 | 7.04e-05 | 1.65e-05 | 0.000496% |
| L627      | False | PBS-25  | 8.96e-06 | 0.000815% | 0.0 | 1 | 0.0062   | 0.000215 | 7.94e-05 | 9.16e-06 | 0.000275% |
| L1816     | False | OD1     | 8.94e-06 | 0.000813% | 0.0 | 1 | 0.000408 | 0.000498 | 8.26e-06 | 5.54e-05 | 0.00166%  |
| L188      | False | SM2F11  | 8.93e-06 | 0.000813% | 0.0 | 1 | 0.00494  | 0.0011   | 0.000185 | 1.31e-05 | 0.000392% |
| L677      | False | koll11  | 8.93e-06 | 0.000813% | 0.0 | 1 | 0.00673  | 0.000363 | 0.000709 | 2.12e-05 | 0.000636% |
| L1610     | False | ZB2     | 8.93e-06 | 0.000813% | 0.0 | 1 | 0.00218  | 0.000109 | 0.000131 | 1.17e-05 | 0.000352% |
| L634      | False | PBS-25  | 8.81e-06 | 0.000801% | 0.0 | 1 | 0.00267  | 0.000128 | 8.32e-06 | 1.44e-05 | 0.000432% |
| OTU_7166  | True  | ABY1    | 8.79e-06 | 0.0008%   | 0.0 | 1 | 0.000677 | 0.0      | 0.0      | 1.88e-05 | 0.000563% |
| OTU_8910  | True  | TM7-1   | 8.78e-06 | 0.000799% | 0.0 | 1 | 0.000421 | 0.0      | 0.0      | 1.61e-05 | 0.000485% |
| L1799     | False | OD1     | 8.76e-06 | 0.000797% | 0.0 | 1 | 0.00121  | 1.94e-05 | 3e-05    | 8.32e-06 | 0.00025%  |
| OTU_217   | True  | koll11  | 8.74e-06 | 0.000796% | 0.0 | 1 | 0.0066   | 0.0013   | 0.00455  | 4.19e-05 | 0.00126%  |
| L1249     | False | TM7-1   | 8.69e-06 | 0.000791% | 0.0 | 1 | 0.000872 | 6.32e-05 | 3.14e-06 | 9.08e-06 | 0.000272% |
| L1711     | False | OD1     | 8.68e-06 | 0.00079%  | 0.0 | 1 | 0.00345  | 0.000807 | 0.00014  | 1.56e-05 | 0.00047%  |
| L1532     | False | OD1     | 8.67e-06 | 0.000789% | 0.0 | 1 | 0.00393  | 0.000632 | 0.0015   | 2.51e-05 | 0.000752% |
| L773      | False | PBS-25  | 8.66e-06 | 0.000788% | 0.0 | 1 | 0.00257  | 0.000217 | 0.00032  | 2.66e-05 | 0.000797% |
| OTU_7192  | True  | ZB2     | 8.62e-06 | 0.000784% | 0.0 | 1 | 0.0      | 0.0      | 0.00067  | 2.22e-05 | 0.000666% |
| OTU_9132  | True  | TM7     | 8.59e-06 | 0.000782% | 0.0 | 1 | 0.00063  | 0.0      | 0.0      | 1.82e-05 | 0.000545% |
| L1096     | False | koll11  | 8.59e-06 | 0.000782% | 0.0 | 1 | 0.0111   | 0.00192  | 0.00312  | 1.37e-05 | 0.000411% |
| L425      | False | OP11    | 8.57e-06 | 0.00078%  | 0.0 | 1 | 0.00231  | 0.000816 | 0.00336  | 6.22e-05 | 0.00187%  |
| OTU_247   | True  | koll11  | 8.56e-06 | 0.000779% | 0.0 | 1 | 0.0035   | 0.000891 | 0.00383  | 8.77e-05 | 0.00263%  |
| L84       | False | ABY1    | 8.55e-06 | 0.000778% | 0.0 | 1 | 0.00144  | 0.000297 | 0.0      | 1.82e-05 | 0.000545% |
| L1039     | False | koll11  | 8.52e-06 | 0.000775% | 0.0 | 1 | 0.00708  | 0.00132  | 0.00481  | 3.67e-05 | 0.0011%   |
| OTU_9845  | True  | SC3     | 8.46e-06 | 0.00077%  | 0.0 | 1 | 0.000424 | 0.0      | 0.0      | 1.61e-05 | 0.000484% |
| L1144     | False | koll11  | 8.45e-06 | 0.000769% | 0.0 | 1 | 0.00825  | 0.00106  | 0.00105  | 2.05e-05 | 0.000615% |
| OTU_6586  | True  | OD1     | 8.38e-06 | 0.000762% | 0.0 | 1 | 0.0016   | 0.000493 | 0.000251 | 5.32e-05 | 0.0016%   |
| OTU_6179  | True  | ZB2     | 8.36e-06 | 0.000761% | 0.0 | 1 | 0.000454 | 1.18e-05 | 7.5e-06  | 1.08e-05 | 0.000323% |
| L1722     | False | Mb-NB09 | 8.36e-06 | 0.000761% | 0.0 | 1 | 0.00387  | 0.00161  | 0.00076  | 3.1e-05  | 0.000929% |
| L1055     | False | koll11  | 8.36e-06 | 0.000761% | 0.0 | 1 | 0.00403  | 0.000442 | 0.000611 | 1.37e-05 | 0.00041%  |
| OTU_8127  | True  | ABY1    | 8.32e-06 | 0.000757% | 0.0 | 1 | 0.0      | 3.32e-05 | 0.000588 | 1.5e-05  | 0.000449% |
| OTU_2335  | True  | SBRH58  | 8.28e-06 | 0.000753% | 0.0 | 1 | 0.00108  | 0.000314 | 9.13e-05 | 4.73e-05 | 0.00142%  |
| L1559     | False | ZB2     | 8.27e-06 | 0.000753% | 0.0 | 1 | 0.00821  | 0.000925 | 0.000379 | 1.22e-05 | 0.000367% |
| L8        | False | ABY1    | 8.26e-06 | 0.000752% | 0.0 | 1 | 0.00138  | 0.000585 | 7.6e-06  | 1.9e-05  | 0.000571% |
| L113      | False | ABY1    | 8.26e-06 | 0.000752% | 0.0 | 1 | 1.99e-05 | 0.00233  | 0.00126  | 1.93e-05 | 0.00058%  |
| OTU_8196  | True  | TM7-3   | 8.21e-06 | 0.000748% | 0.0 | 1 | 0.00636  | 0.0      | 1.4e-05  | 1.86e-05 | 0.000557% |
| L1516     | False | OD1     | 8.21e-06 | 0.000747% | 0.0 | 1 | 0.00222  | 0.000137 | 0.00102  | 3.75e-05 | 0.00113%  |
| OTU_7442  | True  | TM7-1   | 8.17e-06 | 0.000743% | 0.0 | 1 | 0.00092  | 0.000594 | 5.57e-05 | 3.32e-05 | 0.000998% |
| L1016     | False | koll11  | 8.11e-06 | 0.000738% | 0.0 | 1 | 0.0127   | 0.00218  | 0.00409  | 2.73e-05 | 0.000818% |
| OTU_9129  | True  | Mb-NB09 | 8.1e-06  | 0.000737% | 0.0 | 1 | 0.00263  | 0.000103 | 5.5e-07  | 2.03e-05 | 0.000608% |
| OTU_5341  | True  | OD1     | 8.09e-06 | 0.000736% | 0.0 | 1 | 0.0      | 0.000266 | 0.0      | 2.34e-05 | 0.000702% |
| L128      | False | OD1     | 8.07e-06 | 0.000735% | 0.0 | 1 | 0.0124   | 0.0309   | 0.0167   | 8e-05    | 0.0024%   |
| L1845     | False | OD1     | 8.05e-06 | 0.000733% | 0.0 | 1 | 0.00469  | 0.00115  | 0.00044  | 1.76e-05 | 0.000529% |
| L538      | False | SJA-4   | 8.03e-06 | 0.000731% | 0.0 | 1 | 0.00489  | 0.00132  | 0.00255  | 7.95e-05 | 0.00238%  |
| OTU_6064  | True  | ZB2     | 8.03e-06 | 0.000731% | 0.0 | 1 | 0.000101 | 0.00173  | 0.00189  | 3.84e-05 | 0.00115%  |
| L745      | False | PBS-25  | 7.97e-06 | 0.000725% | 0.0 | 1 | 0.00846  | 0.000636 | 0.00254  | 1.71e-05 | 0.000512% |
| L1179     | False | GIF10   | 7.97e-06 | 0.000725% | 0.0 | 1 | 0.00458  | 0.000574 | 0.00033  | 9.94e-06 | 0.000298% |
| OTU_5362  | True  | ZB2     | 7.92e-06 | 0.000721% | 0.0 | 1 | 0.000655 | 1.67e-05 | 2.8e-06  | 1.35e-05 | 0.000405% |
| OTU_9171  | True  | Mb-NB09 | 7.91e-06 | 0.00072%  | 0.0 | 1 | 0.000782 | 5.31e-05 | 0.0      | 1.18e-05 | 0.000353% |
| OTU_6914  | True  | ZB2     | 7.91e-06 | 0.00072%  | 0.0 | 1 | 0.000842 | 0.000336 | 8.21e-05 | 3.58e-05 | 0.00107%  |
| L395      | False | ABY1    | 7.9e-06  | 0.000719% | 0.0 | 1 | 0.00309  | 0.000133 | 0.000122 | 7.6e-06  | 0.000228% |
| L1045     | False | koll11  | 7.88e-06 | 0.000717% | 0.0 | 1 | 0.0118   | 0.00215  | 0.0062   | 2.98e-05 | 0.000893% |
| L1702     | False | OD1     | 7.87e-06 | 0.000717% | 0.0 | 1 | 0.00213  | 0.000165 | 3.61e-05 | 9e-06    | 0.00027%  |

|           |       |        |          |           |     |   |          |          |          |          |           |
|-----------|-------|--------|----------|-----------|-----|---|----------|----------|----------|----------|-----------|
| L492      | False | OP11-4 | 7.86e-06 | 0.000715% | 0.0 | 1 | 0.00142  | 0.000368 | 7.14e-05 | 1.12e-05 | 0.000336% |
| L1770     | False | OD1    | 7.85e-06 | 0.000715% | 0.0 | 1 | 0.00196  | 0.000411 | 0.000104 | 1.94e-05 | 0.000581% |
| L776      | False | PBS-25 | 7.85e-06 | 0.000715% | 0.0 | 1 | 0.0018   | 0.00017  | 8.61e-05 | 2.22e-05 | 0.000666% |
| L283      | False | ABY1   | 7.85e-06 | 0.000714% | 0.0 | 1 | 0.00704  | 0.0195   | 0.0204   | 6.32e-05 | 0.0019%   |
| L14       | False | OD1    | 7.83e-06 | 0.000713% | 0.0 | 1 | 0.00152  | 0.000813 | 5.45e-06 | 2.72e-05 | 0.000816% |
| L82       | False | ABY1   | 7.82e-06 | 0.000712% | 0.0 | 1 | 0.00174  | 0.000778 | 1.24e-05 | 2.22e-05 | 0.000665% |
| L1190     | False | koll11 | 7.81e-06 | 0.000711% | 0.0 | 1 | 0.00119  | 1.16e-05 | 3.38e-05 | 1.1e-05  | 0.00033%  |
| OTU_6987  | True  | OD1    | 7.8e-06  | 0.00071%  | 0.0 | 1 | 0.00465  | 0.00161  | 0.000296 | 1.97e-05 | 0.00059%  |
| L1547     | False | ZB2    | 7.79e-06 | 0.000709% | 0.0 | 1 | 0.00248  | 0.000283 | 0.000108 | 1e-05    | 0.000301% |
| OTU_6039  | True  | OD1    | 7.77e-06 | 0.000707% | 0.0 | 1 | 0.000256 | 1.12e-05 | 3.27e-05 | 2.73e-05 | 0.00082%  |
| OTU_7940  | True  | ABY1   | 7.75e-06 | 0.000705% | 0.0 | 1 | 0.00239  | 0.000116 | 0.000107 | 8.64e-06 | 0.000259% |
| OTU_8113  | True  | ABY1   | 7.74e-06 | 0.000705% | 0.0 | 1 | 0.000299 | 0.000482 | 1.24e-05 | 4.64e-05 | 0.00139%  |
| L978      | False | koll11 | 7.73e-06 | 0.000704% | 0.0 | 1 | 0.00367  | 0.000869 | 0.000447 | 1.76e-05 | 0.000528% |
| L1048     | False | koll11 | 7.73e-06 | 0.000703% | 0.0 | 1 | 0.00725  | 0.00147  | 0.00386  | 4.4e-05  | 0.00132%  |
| OTU_2377  | True  | SJA-4  | 7.7e-06  | 0.000701% | 0.0 | 1 | 0.000551 | 0.0      | 0.0      | 1.58e-05 | 0.000475% |
| L1886     | False | OD1    | 7.69e-06 | 0.0007%   | 0.0 | 1 | 0.00252  | 0.000827 | 0.000171 | 1.49e-05 | 0.000447% |
| OTU_8003  | True  | d153   | 7.67e-06 | 0.000698% | 0.0 | 1 | 0.00027  | 5.04e-07 | 0.0      | 1.57e-05 | 0.000471% |
| OTU_8764  | True  | ABY1   | 7.66e-06 | 0.000698% | 0.0 | 1 | 0.000595 | 7.5e-05  | 5.83e-08 | 1.46e-05 | 0.000439% |
| L1694     | False | OD1    | 7.66e-06 | 0.000697% | 0.0 | 1 | 0.00308  | 0.000401 | 8.26e-05 | 6.78e-06 | 0.000203% |
| L65       | False | ABY1   | 7.63e-06 | 0.000695% | 0.0 | 1 | 0.00215  | 0.000229 | 0.000101 | 2.8e-05  | 0.000839% |
| L139      | False | OD1    | 7.61e-06 | 0.000693% | 0.0 | 1 | 0.0079   | 0.0178   | 0.00593  | 7.1e-05  | 0.00213%  |
| OTU_10750 | True  | OP11-4 | 7.58e-06 | 0.00069%  | 0.0 | 1 | 0.000364 | 0.0      | 0.0      | 1.61e-05 | 0.000484% |
| OTU_5954  | True  | OD1    | 7.58e-06 | 0.00069%  | 0.0 | 1 | 0.000561 | 0.0      | 1.48e-05 | 1.77e-05 | 0.00053%  |
| OTU_8147  | True  | ABY1   | 7.57e-06 | 0.000689% | 0.0 | 1 | 0.000453 | 3.78e-06 | 2.49e-05 | 1.02e-05 | 0.000307% |
| OTU_8013  | True  | ABY1   | 7.55e-06 | 0.000688% | 0.0 | 1 | 4.9e-06  | 0.000477 | 0.00154  | 2.8e-05  | 0.000839% |
| L1131     | False | koll11 | 7.54e-06 | 0.000687% | 0.0 | 1 | 0.0018   | 0.000213 | 0.000127 | 1.66e-05 | 0.000497% |
| OTU_4911  | True  | OD1    | 7.51e-06 | 0.000684% | 0.0 | 1 | 0.000751 | 0.000225 | 1.83e-06 | 2.43e-05 | 0.000729% |
| L1551     | False | ZB2    | 7.47e-06 | 0.00068%  | 0.0 | 1 | 0.00541  | 0.00135  | 0.000553 | 1.51e-05 | 0.000453% |
| OTU_7946  | True  | ABY1   | 7.45e-06 | 0.000678% | 0.0 | 1 | 0.000209 | 0.0      | 0.0      | 1.38e-05 | 0.000413% |
| OTU_7982  | True  | ABY1   | 7.41e-06 | 0.000674% | 0.0 | 1 | 0.00274  | 0.00147  | 7.84e-05 | 2.16e-05 | 0.00065%  |
| L55       | False | ABY1   | 7.38e-06 | 0.000671% | 0.0 | 1 | 0.00293  | 8.35e-05 | 0.0      | 1.54e-05 | 0.000462% |
| OTU_8823  | True  | OD1    | 7.32e-06 | 0.000667% | 0.0 | 1 | 0.000755 | 0.0      | 0.0      | 1.51e-05 | 0.000454% |
| OTU_4488  | True  | PRR-12 | 7.3e-06  | 0.000664% | 0.0 | 1 | 0.00021  | 0.0      | 0.0      | 1.54e-05 | 0.000462% |
| OTU_2351  | True  | SJA-4  | 7.26e-06 | 0.000661% | 0.0 | 1 | 0.000375 | 0.0      | 0.0      | 1.49e-05 | 0.000446% |
| L345      | False | OD1    | 7.25e-06 | 0.00066%  | 0.0 | 1 | 0.00648  | 0.00103  | 0.000697 | 1.1e-05  | 0.000329% |
| OTU_9178  | True  | ABY1   | 7.25e-06 | 0.00066%  | 0.0 | 1 | 0.000446 | 0.0      | 5.83e-08 | 8.88e-06 | 0.000266% |
| OTU_8334  | True  | ABY1   | 7.19e-06 | 0.000655% | 0.0 | 1 | 0.000264 | 0.0      | 0.0      | 1.54e-05 | 0.000461% |
| L356      | False | ABY1   | 7.16e-06 | 0.000652% | 0.0 | 1 | 0.000481 | 2.32e-05 | 3.68e-06 | 9.43e-06 | 0.000283% |
| OTU_2076  | True  | PRR-12 | 7.12e-06 | 0.000648% | 0.0 | 1 | 0.00064  | 0.0      | 5.83e-08 | 1.07e-05 | 0.000321% |
| OTU_163   | True  | koll11 | 7.06e-06 | 0.000642% | 0.0 | 1 | 0.00704  | 0.00207  | 0.00296  | 4.72e-05 | 0.00142%  |
| OTU_895   | True  | PRR-12 | 7.04e-06 | 0.000641% | 0.0 | 1 | 0.00112  | 8.13e-05 | 1.83e-05 | 1.08e-05 | 0.000325% |
| L41       | False | OD1    | 7.02e-06 | 0.000639% | 0.0 | 1 | 0.00411  | 0.000409 | 0.000857 | 1.14e-05 | 0.000342% |
| L334      | False | OD1    | 6.98e-06 | 0.000636% | 0.0 | 1 | 0.000795 | 0.000287 | 4.55e-05 | 2.19e-05 | 0.000658% |
| OTU_430   | True  | PBS-25 | 6.98e-06 | 0.000635% | 0.0 | 1 | 0.00526  | 0.00034  | 0.00074  | 1.42e-05 | 0.000428% |
| L107      | False | ABY1   | 6.96e-06 | 0.000634% | 0.0 | 1 | 0.00396  | 0.000674 | 0.000337 | 6.71e-06 | 0.000201% |
| L1504     | False | ZB2    | 6.96e-06 | 0.000634% | 0.0 | 1 | 0.000183 | 0.00077  | 0.0      | 3.5e-05  | 0.00105%  |
| L506      | False | OP11-4 | 6.91e-06 | 0.000629% | 0.0 | 1 | 0.00571  | 0.000683 | 0.000561 | 8.54e-06 | 0.000256% |
| OTU_6990  | True  | ZB2    | 6.91e-06 | 0.000629% | 0.0 | 1 | 0.00011  | 0.00209  | 0.000806 | 3.37e-05 | 0.00101%  |
| L876      | False | koll11 | 6.9e-06  | 0.000628% | 0.0 | 1 | 0.0199   | 0.00483  | 0.00568  | 1.26e-05 | 0.000378% |
| L824      | False | PBS-25 | 6.88e-06 | 0.000626% | 0.0 | 1 | 0.0188   | 0.00191  | 0.00143  | 6.35e-06 | 0.00019%  |
| OTU_1149  | True  | koll11 | 6.88e-06 | 0.000626% | 0.0 | 1 | 0.000569 | 0.000317 | 5.49e-05 | 3.28e-05 | 0.000983% |
| OTU_7850  | True  | ABY1   | 6.86e-06 | 0.000625% | 0.0 | 1 | 0.000172 | 0.0      | 1.1e-06  | 1.49e-05 | 0.000448% |
| L718      | False | PBS-25 | 6.84e-06 | 0.000623% | 0.0 | 1 | 0.00459  | 0.000868 | 0.000585 | 1.68e-05 | 0.000503% |
| L1486     | False | ZB2    | 6.83e-06 | 0.000621% | 0.0 | 1 | 0.00259  | 0.000893 | 0.000496 | 2.61e-05 | 0.000784% |
| L858      | False | OP3    | 6.82e-06 | 0.000621% | 0.0 | 1 | 0.0204   | 0.002    | 0.00172  | 3.66e-06 | 0.00011%  |
| L1606     | False | OD1    | 6.81e-06 | 0.00062%  | 0.0 | 1 | 0.00922  | 0.00523  | 0.00233  | 3.41e-05 | 0.00102%  |
| OTU_6178  | True  | ZB2    | 6.8e-06  | 0.000619% | 0.0 | 1 | 0.00332  | 0.000402 | 0.000145 | 1.48e-05 | 0.000445% |
| OTU_8141  | True  | ABY1   | 6.79e-06 | 0.000618% | 0.0 | 1 | 2.35e-05 | 0.00586  | 0.00249  | 1.7e-05  | 0.000511% |
| OTU_6986  | True  | ZB2    | 6.78e-06 | 0.000617% | 0.0 | 1 | 0.000561 | 0.000326 | 0.000126 | 3.97e-05 | 0.00119%  |
| L469      | False | OP11-4 | 6.73e-06 | 0.000613% | 0.0 | 1 | 0.00232  | 0.000461 | 9.96e-05 | 6.04e-06 | 0.000181% |
| OTU_325   | True  | koll11 | 6.72e-06 | 0.000612% | 0.0 | 1 | 0.00115  | 9.09e-06 | 0.0      | 1.17e-05 | 0.000351% |
| OTU_415   | True  | koll11 | 6.69e-06 | 0.000609% | 0.0 | 1 | 0.000578 | 0.0      | 0.0      | 1.8e-05  | 0.000539% |
| L1058     | False | koll11 | 6.69e-06 | 0.000609% | 0.0 | 1 | 0.0026   | 0.000381 | 0.00059  | 1.84e-05 | 0.000553% |
| OTU_8010  | True  | ABY1   | 6.67e-06 | 0.000607% | 0.0 | 1 | 0.000346 | 4.93e-05 | 1.59e-06 | 2.59e-05 | 0.000778% |

|           |       |         |          |           |     |   |          |          |          |          |           |
|-----------|-------|---------|----------|-----------|-----|---|----------|----------|----------|----------|-----------|
| OTU_8008  | True  | TM7-1   | 6.65e-06 | 0.000605% | 0.0 | 1 | 0.000458 | 0.0      | 0.0      | 1.71e-05 | 0.000513% |
| OTU_7143  | True  | OP11-4  | 6.64e-06 | 0.000605% | 0.0 | 1 | 0.000875 | 3.92e-05 | 0.000589 | 4.01e-05 | 0.0012%   |
| L470      | False | OP11-4  | 6.63e-06 | 0.000603% | 0.0 | 1 | 0.00147  | 0.000282 | 6.03e-05 | 7.36e-06 | 0.000221% |
| OTU_82    | True  | ZB2     | 6.62e-06 | 0.000603% | 0.0 | 1 | 0.000182 | 1.94e-05 | 0.000163 | 6.58e-05 | 0.00197%  |
| OTU_8768  | True  | Mb-NB09 | 6.59e-06 | 0.0006%   | 0.0 | 1 | 0.00146  | 0.000159 | 5.41e-05 | 6.28e-06 | 0.000188% |
| OTU_8318  | True  | OD1     | 6.59e-06 | 0.0006%   | 0.0 | 1 | 0.00036  | 7e-05    | 0.0      | 2.2e-05  | 0.00066%  |
| L301      | False | ABY1    | 6.58e-06 | 0.000599% | 0.0 | 1 | 0.000657 | 0.00594  | 0.00252  | 3.04e-05 | 0.000913% |
| L599      | False | PRR-12  | 6.58e-06 | 0.000599% | 0.0 | 1 | 0.00254  | 0.000161 | 7.3e-05  | 8.69e-06 | 0.000261% |
| L1086     | False | koll11  | 6.58e-06 | 0.000599% | 0.0 | 1 | 0.00813  | 0.000583 | 0.000283 | 1.15e-05 | 0.000346% |
| OTU_8221  | True  | OD1     | 6.58e-06 | 0.000599% | 0.0 | 1 | 0.000119 | 0.0      | 0.0      | 1.17e-05 | 0.000352% |
| OTU_6298  | True  | OD1     | 6.57e-06 | 0.000598% | 0.0 | 1 | 0.00212  | 0.000972 | 0.000524 | 5.33e-05 | 0.0016%   |
| OTU_10776 | True  | OP11-4  | 6.5e-06  | 0.000592% | 0.0 | 1 | 5.06e-05 | 2.91e-06 | 0.000445 | 2.39e-05 | 0.000717% |
| L768      | False | PBS-25  | 6.5e-06  | 0.000591% | 0.0 | 1 | 0.00357  | 0.00036  | 0.000348 | 1.38e-05 | 0.000414% |
| L601      | False | PRR-12  | 6.46e-06 | 0.000588% | 0.0 | 1 | 0.00166  | 0.000116 | 5.56e-05 | 1.19e-05 | 0.000356% |
| OTU_455   | True  | PBS-25  | 6.4e-06  | 0.000583% | 0.0 | 1 | 0.00166  | 0.000152 | 1.77e-06 | 1.55e-05 | 0.000464% |
| OTU_359   | True  | koll11  | 6.39e-06 | 0.000582% | 0.0 | 1 | 0.00056  | 0.0      | 0.0      | 1.19e-05 | 0.000357% |
| OTU_604   | True  | koll11  | 6.35e-06 | 0.000578% | 0.0 | 1 | 0.00281  | 0.000234 | 5.35e-05 | 1.11e-05 | 0.000334% |
| L209      | False | ABY1    | 6.35e-06 | 0.000578% | 0.0 | 1 | 0.00116  | 3.45e-05 | 1.77e-05 | 9.17e-06 | 0.000275% |
| L1199     | False | koll11  | 6.35e-06 | 0.000578% | 0.0 | 1 | 0.00187  | 0.000834 | 0.000182 | 2.25e-05 | 0.000674% |
| L1800     | False | OD1     | 6.34e-06 | 0.000577% | 0.0 | 1 | 0.000592 | 1.94e-05 | 3e-05    | 9.39e-06 | 0.000282% |
| L172      | False | OD1     | 6.33e-06 | 0.000577% | 0.0 | 1 | 0.0278   | 0.00763  | 0.00347  | 7.2e-06  | 0.000216% |
| L284      | False | ABY1    | 6.33e-06 | 0.000576% | 0.0 | 1 | 0.00614  | 0.00952  | 0.0135   | 0.00011  | 0.00331%  |
| L827      | False | PBS-25  | 6.32e-06 | 0.000576% | 0.0 | 1 | 0.00321  | 0.000546 | 0.000295 | 1.79e-05 | 0.000536% |
| L120      | False | ABY1    | 6.31e-06 | 0.000574% | 0.0 | 1 | 0.000948 | 1.76e-05 | 0.0      | 1.23e-05 | 0.000369% |
| L499      | False | OP11-4  | 6.29e-06 | 0.000573% | 0.0 | 1 | 0.000582 | 4.23e-05 | 0.0      | 7.24e-06 | 0.000217% |
| L243      | False | ABY1    | 6.26e-06 | 0.00057%  | 0.0 | 1 | 0.000861 | 9.9e-05  | 0.00083  | 5.6e-05  | 0.00168%  |
| L427      | False | OP11    | 6.25e-06 | 0.000569% | 0.0 | 1 | 0.00109  | 0.000357 | 0.000768 | 8.31e-05 | 0.00249%  |
| OTU_6669  | True  | ZB2     | 6.23e-06 | 0.000567% | 0.0 | 1 | 9.12e-06 | 0.0      | 0.000287 | 1.85e-05 | 0.000554% |
| OTU_1019  | True  | PBS-25  | 6.23e-06 | 0.000567% | 0.0 | 1 | 0.000824 | 1.47e-05 | 1.05e-05 | 1.37e-05 | 0.000411% |
| L147      | False | OD1     | 6.23e-06 | 0.000567% | 0.0 | 1 | 0.0037   | 0.000906 | 0.000338 | 1.02e-05 | 0.000306% |
| L1607     | False | OD1     | 6.23e-06 | 0.000567% | 0.0 | 1 | 0.00429  | 0.00264  | 0.000931 | 3.3e-05  | 0.000991% |
| L1107     | False | koll11  | 6.21e-06 | 0.000565% | 0.0 | 1 | 0.00134  | 3.18e-05 | 3.72e-05 | 6.99e-06 | 0.00021%  |
| L336      | False | OD1     | 6.2e-06  | 0.000564% | 0.0 | 1 | 0.00069  | 5.51e-05 | 4.52e-05 | 1.09e-05 | 0.000329% |
| L1753     | False | OD1     | 6.18e-06 | 0.000562% | 0.0 | 1 | 0.000465 | 0.0011   | 0.00151  | 0.000155 | 0.00465%  |
| L1291     | False | TM7-3   | 6.15e-06 | 0.00056%  | 0.0 | 1 | 0.00775  | 0.000105 | 0.00266  | 2.52e-05 | 0.000756% |
| L1163     | False | koll11  | 6.12e-06 | 0.000557% | 0.0 | 1 | 0.00144  | 3.75e-05 | 2.71e-05 | 1.24e-05 | 0.000374% |
| L277      | False | ABY1    | 6.12e-06 | 0.000557% | 0.0 | 1 | 0.0101   | 0.021    | 0.0205   | 9.49e-05 | 0.00285%  |
| OTU_7978  | True  | ABY1    | 6.12e-06 | 0.000557% | 0.0 | 1 | 0.000918 | 0.00041  | 2.41e-05 | 1.57e-05 | 0.000472% |
| OTU_463   | True  | koll11  | 6.11e-06 | 0.000556% | 0.0 | 1 | 0.000377 | 0.000243 | 0.00173  | 4.5e-05  | 0.00135%  |
| L1908     | False | OD1     | 6.1e-06  | 0.000555% | 0.0 | 1 | 0.00066  | 4.2e-05  | 5.97e-06 | 9.05e-06 | 0.000272% |
| OTU_7174  | True  | OD1     | 6.09e-06 | 0.000554% | 0.0 | 1 | 0.00404  | 0.000574 | 0.000291 | 1.18e-05 | 0.000355% |
| L363      | False | OD1     | 6.08e-06 | 0.000554% | 0.0 | 1 | 0.000863 | 1.64e-05 | 7.1e-07  | 8.44e-06 | 0.000253% |
| L1462     | False | ZB2     | 6.08e-06 | 0.000554% | 0.0 | 1 | 0.000338 | 0.00439  | 0.00551  | 1.28e-05 | 0.000383% |
| L1319     | False | OD1     | 6.08e-06 | 0.000553% | 0.0 | 1 | 0.00033  | 0.0      | 1.29e-05 | 7.01e-06 | 0.00021%  |
| L726      | False | PBS-25  | 6.05e-06 | 0.000551% | 0.0 | 1 | 0.0077   | 0.00109  | 0.00275  | 2.02e-05 | 0.000605% |
| OTU_6494  | True  | ZB2     | 6.02e-06 | 0.000548% | 0.0 | 1 | 0.00137  | 0.000173 | 0.000211 | 1.41e-05 | 0.000423% |
| L474      | False | OP11-4  | 6e-06    | 0.000546% | 0.0 | 1 | 0.00129  | 0.00028  | 5.54e-05 | 7.28e-06 | 0.000218% |
| L376      | False | OD1     | 5.98e-06 | 0.000544% | 0.0 | 1 | 0.00117  | 3.53e-05 | 7.74e-05 | 7.83e-06 | 0.000235% |
| L294      | False | ABY1    | 5.97e-06 | 0.000543% | 0.0 | 1 | 0.00575  | 0.00619  | 0.0109   | 0.000131 | 0.00393%  |
| L631      | False | PBS-25  | 5.94e-06 | 0.00054%  | 0.0 | 1 | 0.00257  | 6.75e-05 | 7.1e-05  | 1.06e-05 | 0.000318% |
| L1821     | False | OD1     | 5.92e-06 | 0.000539% | 0.0 | 1 | 0.000816 | 0.000225 | 1.89e-06 | 1.71e-05 | 0.000514% |
| OTU_7028  | True  | ABY1    | 5.9e-06  | 0.000537% | 0.0 | 1 | 0.0      | 0.00139  | 0.000904 | 1.76e-05 | 0.000527% |
| OTU_8909  | True  | ABY1    | 5.89e-06 | 0.000537% | 0.0 | 1 | 0.000852 | 8.86e-06 | 0.0      | 1.17e-05 | 0.000352% |
| OTU_6699  | True  | ZB2     | 5.89e-06 | 0.000536% | 0.0 | 1 | 0.000296 | 6.98e-05 | 0.0      | 2e-05    | 0.0006%   |
| L1688     | False | OD1     | 5.88e-06 | 0.000535% | 0.0 | 1 | 0.0146   | 0.00308  | 0.00104  | 4.4e-06  | 0.000132% |
| L1569     | False | ZB2     | 5.85e-06 | 0.000533% | 0.0 | 1 | 0.003    | 0.000466 | 0.000589 | 8.67e-06 | 0.00026%  |
| L1175     | False | koll11  | 5.85e-06 | 0.000532% | 0.0 | 1 | 0.00957  | 0.00328  | 0.00297  | 2.53e-05 | 0.00076%  |
| OTU_349   | True  | koll11  | 5.81e-06 | 0.000529% | 0.0 | 1 | 0.00184  | 0.000434 | 8.88e-05 | 1.6e-05  | 0.000481% |
| OTU_4142  | True  | koll11  | 5.81e-06 | 0.000529% | 0.0 | 1 | 0.000543 | 0.0      | 0.0      | 1.26e-05 | 0.000377% |
| L653      | False | koll11  | 5.81e-06 | 0.000529% | 0.0 | 1 | 0.0214   | 0.00391  | 0.00486  | 6.93e-06 | 0.000208% |
| L1333     | False | ZB2     | 5.8e-06  | 0.000528% | 0.0 | 1 | 0.004    | 0.00115  | 0.000393 | 7.67e-06 | 0.00023%  |
| L1195     | False | koll11  | 5.8e-06  | 0.000528% | 0.0 | 1 | 0.0029   | 0.00161  | 0.000647 | 3.41e-05 | 0.00102%  |
| OTU_8770  | True  | OD1     | 5.79e-06 | 0.000527% | 0.0 | 1 | 0.000156 | 7.74e-06 | 0.0      | 1.25e-05 | 0.000377% |
| OTU_5589  | True  | OD1     | 5.75e-06 | 0.000524% | 0.0 | 1 | 0.000309 | 8.46e-06 | 2.69e-05 | 1.37e-05 | 0.000411% |
| OTU_2334  | True  | SJA-4   | 5.74e-06 | 0.000523% | 0.0 | 1 | 2.79e-06 | 0.000181 | 0.000791 | 2.47e-05 | 0.000741% |

|           |       |         |          |           |     |   |          |          |          |          |           |
|-----------|-------|---------|----------|-----------|-----|---|----------|----------|----------|----------|-----------|
| L1141     | False | koll11  | 5.72e-06 | 0.00052%  | 0.0 | 1 | 0.00777  | 0.00171  | 0.000598 | 1.18e-05 | 0.000353% |
| OTU_6309  | True  | ZB2     | 5.7e-06  | 0.000519% | 0.0 | 1 | 0.000593 | 8.21e-07 | 3.52e-07 | 7.09e-06 | 0.000213% |
| OTU_6584  | True  | OD1     | 5.67e-06 | 0.000516% | 0.0 | 1 | 0.0      | 0.00016  | 0.000689 | 2.27e-05 | 0.00068%  |
| L195      | False | ABY1    | 5.66e-06 | 0.000515% | 0.0 | 1 | 0.00224  | 0.00068  | 3.3e-05  | 7.82e-06 | 0.000235% |
| L1073     | False | koll11  | 5.59e-06 | 0.000509% | 0.0 | 1 | 0.00216  | 0.000126 | 0.0      | 6.96e-06 | 0.000209% |
| L1598     | False | OD1     | 5.59e-06 | 0.000508% | 0.0 | 1 | 6e-05    | 0.00872  | 0.00274  | 9.28e-06 | 0.000278% |
| L69       | False | ABY1    | 5.59e-06 | 0.000508% | 0.0 | 1 | 0.00157  | 0.00658  | 0.00546  | 5.7e-05  | 0.00171%  |
| OTU_7350  | True  | ABY1    | 5.58e-06 | 0.000508% | 0.0 | 1 | 1.99e-05 | 0.000946 | 0.000354 | 1.62e-05 | 0.000485% |
| L534      | False | TM6     | 5.57e-06 | 0.000507% | 0.0 | 1 | 0.00627  | 0.00164  | 0.00264  | 4.05e-05 | 0.00122%  |
| OTU_8120  | True  | ABY1    | 5.56e-06 | 0.000506% | 0.0 | 1 | 9.17e-06 | 0.00164  | 0.00285  | 1.21e-05 | 0.000362% |
| L1252     | False | TM7-1   | 5.55e-06 | 0.000505% | 0.0 | 1 | 0.000602 | 7.3e-05  | 0.00729  | 1.85e-05 | 0.000554% |
| OTU_361   | True  | koll11  | 5.53e-06 | 0.000503% | 0.0 | 1 | 0.00106  | 0.000212 | 5.2e-05  | 1.07e-05 | 0.00032%  |
| L269      | False | OD1     | 5.51e-06 | 0.000501% | 0.0 | 1 | 0.00471  | 0.00804  | 0.00326  | 0.000109 | 0.00326%  |
| L285      | False | ABY1    | 5.51e-06 | 0.000501% | 0.0 | 1 | 0.000397 | 0.00332  | 0.00264  | 2.3e-05  | 0.000691% |
| L1583     | False | ZB2     | 5.5e-06  | 0.000501% | 0.0 | 1 | 0.00138  | 0.000173 | 0.000392 | 1.66e-05 | 0.0005%   |
| OTU_6761  | True  | ZB2     | 5.5e-06  | 0.000501% | 0.0 | 1 | 0.0      | 2.16e-05 | 0.000524 | 1.72e-05 | 0.000518% |
| L1272     | False | TM7     | 5.48e-06 | 0.000498% | 0.0 | 1 | 0.000933 | 0.000223 | 1.63e-05 | 1.76e-05 | 0.000529% |
| L109      | False | ABY1    | 5.45e-06 | 0.000496% | 0.0 | 1 | 0.00362  | 0.000674 | 0.000322 | 5.78e-06 | 0.000173% |
| L305      | False | ABY1    | 5.41e-06 | 0.000492% | 0.0 | 1 | 0.000358 | 0.00593  | 0.00252  | 1.97e-05 | 0.000593% |
| L1887     | False | OD1     | 5.4e-06  | 0.000492% | 0.0 | 1 | 0.000447 | 8.81e-05 | 2.18e-05 | 1.47e-05 | 0.000442% |
| OTU_268   | True  | koll11  | 5.39e-06 | 0.000491% | 0.0 | 1 | 0.000748 | 0.000221 | 0.00226  | 3.65e-05 | 0.0011%   |
| OTU_170   | True  | koll11  | 5.36e-06 | 0.000488% | 0.0 | 1 | 0.00214  | 0.000366 | 0.000113 | 1.05e-05 | 0.000316% |
| L194      | False | ABY1    | 5.33e-06 | 0.000485% | 0.0 | 1 | 0.00471  | 0.001    | 0.000639 | 8.3e-06  | 0.000249% |
| OTU_428   | True  | koll11  | 5.31e-06 | 0.000483% | 0.0 | 1 | 9.36e-05 | 2.27e-05 | 0.000747 | 2.18e-05 | 0.000654% |
| OTU_485   | True  | koll11  | 5.29e-06 | 0.000482% | 0.0 | 1 | 0.00258  | 0.0      | 7.79e-07 | 1.09e-05 | 0.000326% |
| OTU_162   | True  | OD1     | 5.29e-06 | 0.000481% | 0.0 | 1 | 9.11e-05 | 0.0      | 0.0      | 1.31e-05 | 0.000392% |
| L945      | False | koll11  | 5.27e-06 | 0.000479% | 0.0 | 1 | 0.00404  | 0.00108  | 0.000843 | 9.67e-06 | 0.00029%  |
| OTU_6559  | True  | ZB2     | 5.24e-06 | 0.000477% | 0.0 | 1 | 0.0      | 4.54e-05 | 0.00116  | 1.34e-05 | 0.000402% |
| L1059     | False | koll11  | 5.24e-06 | 0.000477% | 0.0 | 1 | 0.000685 | 7.14e-05 | 5.73e-05 | 9.46e-06 | 0.000284% |
| L1292     | False | TM7-3   | 5.23e-06 | 0.000476% | 0.0 | 1 | 0.00138  | 0.000105 | 0.00264  | 3.35e-05 | 0.001%    |
| L330      | False | ABY1    | 5.23e-06 | 0.000476% | 0.0 | 1 | 0.000947 | 1.11e-05 | 2.91e-05 | 6.54e-06 | 0.000196% |
| OTU_6221  | True  | ZB2     | 5.22e-06 | 0.000475% | 0.0 | 1 | 0.000765 | 4.23e-07 | 0.0      | 9.88e-06 | 0.000296% |
| OTU_7948  | True  | ABY1    | 5.21e-06 | 0.000474% | 0.0 | 1 | 0.000366 | 1.89e-05 | 2.55e-05 | 1.29e-05 | 0.000388% |
| L906      | False | koll11  | 5.2e-06  | 0.000473% | 0.0 | 1 | 0.0022   | 0.000236 | 0.000837 | 2.26e-05 | 0.000679% |
| OTU_250   | True  | koll11  | 5.2e-06  | 0.000473% | 0.0 | 1 | 0.00121  | 0.000315 | 0.000335 | 2.66e-05 | 0.000799% |
| OTU_1383  | True  | koll11  | 5.19e-06 | 0.000473% | 0.0 | 1 | 0.0      | 0.000832 | 3.04e-06 | 1.55e-05 | 0.000466% |
| OTU_7837  | True  | ZB2     | 5.19e-06 | 0.000473% | 0.0 | 1 | 0.000273 | 0.0      | 0.0      | 9.7e-06  | 0.000291% |
| OTU_8327  | True  | ZB2     | 5.19e-06 | 0.000472% | 0.0 | 1 | 0.0      | 2.59e-05 | 0.000406 | 1.55e-05 | 0.000465% |
| OTU_2333  | True  | PBS-25  | 5.13e-06 | 0.000467% | 0.0 | 1 | 0.00117  | 3.2e-05  | 0.000141 | 1.34e-05 | 0.000403% |
| L1022     | False | koll11  | 5.13e-06 | 0.000467% | 0.0 | 1 | 0.00388  | 0.000855 | 0.00145  | 2.73e-05 | 0.00082%  |
| L674      | False | koll11  | 5.12e-06 | 0.000466% | 0.0 | 1 | 0.0122   | 0.00199  | 0.00202  | 8.3e-06  | 0.000249% |
| OTU_10120 | True  | OD1     | 5.12e-06 | 0.000466% | 0.0 | 1 | 0.000345 | 0.000107 | 0.0      | 1.61e-05 | 0.000484% |
| OTU_60    | True  | OD1     | 5.11e-06 | 0.000465% | 0.0 | 1 | 9e-05    | 1.85e-05 | 0.000397 | 2.59e-05 | 0.000776% |
| L1239     | False | TM7     | 5.11e-06 | 0.000465% | 0.0 | 1 | 0.0121   | 0.012    | 0.021    | 0.000177 | 0.00532%  |
| OTU_6096  | True  | ZB2     | 5.09e-06 | 0.000464% | 0.0 | 1 | 0.00415  | 0.00131  | 0.000529 | 1.52e-05 | 0.000455% |
| OTU_10907 | True  | OP11-4  | 5.08e-06 | 0.000462% | 0.0 | 1 | 0.000156 | 2.71e-06 | 0.0      | 1.09e-05 | 0.000327% |
| L702      | False | koll11  | 5.07e-06 | 0.000461% | 0.0 | 1 | 0.0012   | 4.96e-05 | 0.0      | 8.2e-06  | 0.000246% |
| OTU_4604  | True  | ZB2     | 5.06e-06 | 0.000461% | 0.0 | 1 | 0.000141 | 0.0      | 0.0      | 9.46e-06 | 0.000284% |
| OTU_6696  | True  | ZB2     | 5.05e-06 | 0.00046%  | 0.0 | 1 | 6.26e-06 | 0.00151  | 0.00191  | 3.8e-05  | 0.00114%  |
| L701      | False | koll11  | 5.05e-06 | 0.000459% | 0.0 | 1 | 0.00137  | 4.98e-05 | 0.0      | 6.92e-06 | 0.000208% |
| OTU_166   | True  | OP3     | 5.04e-06 | 0.000459% | 0.0 | 1 | 0.000235 | 0.0      | 0.0      | 8.83e-06 | 0.000265% |
| L1029     | False | koll11  | 5.02e-06 | 0.000457% | 0.0 | 1 | 0.00923  | 0.00148  | 0.00558  | 1.41e-05 | 0.000424% |
| OTU_6269  | True  | OD1     | 5e-06    | 0.000455% | 0.0 | 1 | 0.00014  | 0.0      | 0.000201 | 3.15e-05 | 0.000947% |
| L1724     | False | Mb-NB09 | 4.98e-06 | 0.000453% | 0.0 | 1 | 0.00342  | 0.00151  | 0.000738 | 2.19e-05 | 0.000657% |
| OTU_8043  | True  | ABY1    | 4.98e-06 | 0.000453% | 0.0 | 1 | 0.0004   | 0.0      | 0.0      | 8.6e-06  | 0.000258% |
| L717      | False | PBS-25  | 4.97e-06 | 0.000452% | 0.0 | 1 | 0.0323   | 0.00436  | 0.00545  | 5.96e-06 | 0.000179% |
| OTU_7298  | True  | ABY1    | 4.94e-06 | 0.00045%  | 0.0 | 1 | 0.000115 | 0.00164  | 0.00102  | 2.07e-05 | 0.000621% |
| OTU_240   | True  | koll11  | 4.93e-06 | 0.000448% | 0.0 | 1 | 0.00192  | 4.14e-05 | 1.08e-05 | 9.16e-06 | 0.000275% |
| L433      | False | OP11    | 4.91e-06 | 0.000447% | 0.0 | 1 | 0.00118  | 0.000142 | 0.00163  | 2.52e-05 | 0.000757% |
| OTU_6393  | True  | ZB2     | 4.88e-06 | 0.000444% | 0.0 | 1 | 0.000519 | 7.94e-05 | 9.14e-05 | 1.47e-05 | 0.000441% |
| L1554     | False | ZB2     | 4.87e-06 | 0.000444% | 0.0 | 1 | 0.00432  | 0.00135  | 0.000553 | 1.42e-05 | 0.000426% |
| OTU_4915  | True  | GIF10   | 4.86e-06 | 0.000442% | 0.0 | 1 | 0.000681 | 0.000144 | 5.51e-05 | 1.4e-05  | 0.00042%  |
| L287      | False | ABY1    | 4.83e-06 | 0.00044%  | 0.0 | 1 | 0.000397 | 0.00251  | 0.00213  | 2.72e-05 | 0.000816% |
| OTU_5822  | True  | OD1     | 4.83e-06 | 0.00044%  | 0.0 | 1 | 0.000201 | 1.64e-05 | 0.0      | 7.04e-06 | 0.000211% |
| L675      | False | koll11  | 4.81e-06 | 0.000438% | 0.0 | 1 | 0.00719  | 0.000585 | 0.000728 | 1.12e-05 | 0.000337% |



|           |       |          |          |           |     |   |          |          |          |          |           |
|-----------|-------|----------|----------|-----------|-----|---|----------|----------|----------|----------|-----------|
| L159      | False | ABY1     | 4.81e-06 | 0.000438% | 0.0 | 1 | 0.000598 | 0.000102 | 2.8e-05  | 1.54e-05 | 0.000461% |
| L1474     | False | ZB2      | 4.81e-06 | 0.000438% | 0.0 | 1 | 0.00411  | 0.00172  | 0.000902 | 1.68e-05 | 0.000504% |
| L748      | False | PBS-25   | 4.8e-06  | 0.000437% | 0.0 | 1 | 0.00714  | 0.000514 | 0.0025   | 1.21e-05 | 0.000363% |
| OTU_8060  | True  | OD1      | 4.79e-06 | 0.000436% | 0.0 | 1 | 0.000136 | 8.97e-05 | 0.0      | 2.31e-05 | 0.000694% |
| OTU_10794 | True  | OP11-3   | 4.77e-06 | 0.000434% | 0.0 | 1 | 0.000149 | 0.0      | 0.0      | 1e-05    | 0.000301% |
| L234      | False | ABY1     | 4.76e-06 | 0.000434% | 0.0 | 1 | 0.00358  | 0.00117  | 0.000221 | 1.45e-05 | 0.000436% |
| L1813     | False | OD1      | 4.73e-06 | 0.00043%  | 0.0 | 1 | 0.00203  | 0.000949 | 0.000144 | 2.05e-05 | 0.000616% |
| OTU_10803 | True  | OP11-4   | 4.71e-06 | 0.000429% | 0.0 | 1 | 0.000238 | 4.1e-06  | 0.0      | 9.64e-06 | 0.000289% |
| OTU_2350  | True  | SJA-4    | 4.71e-06 | 0.000429% | 0.0 | 1 | 0.000587 | 0.0      | 0.0      | 9.64e-06 | 0.000289% |
| L1565     | False | ZB2      | 4.69e-06 | 0.000427% | 0.0 | 1 | 0.00495  | 0.00094  | 0.000738 | 5.67e-06 | 0.00017%  |
| OTU_4996  | True  | GIF10    | 4.68e-06 | 0.000426% | 0.0 | 1 | 1.3e-06  | 0.000511 | 0.0      | 1.33e-05 | 0.0004%   |
| OTU_8645  | True  | Mb-NB09  | 4.68e-06 | 0.000426% | 0.0 | 1 | 0.000416 | 4.49e-05 | 3.32e-06 | 6.56e-06 | 0.000197% |
| OTU_472   | True  | koll11   | 4.67e-06 | 0.000425% | 0.0 | 1 | 0.000784 | 0.0      | 0.0      | 1.02e-05 | 0.000305% |
| OTU_5239  | True  | OD1      | 4.67e-06 | 0.000425% | 0.0 | 1 | 0.000622 | 1.32e-05 | 5.97e-06 | 6.51e-06 | 0.000195% |
| L1832     | False | OD1      | 4.65e-06 | 0.000423% | 0.0 | 1 | 0.002    | 0.00222  | 0.000798 | 0.000108 | 0.00323%  |
| L956      | False | koll11   | 4.63e-06 | 0.000422% | 0.0 | 1 | 0.00131  | 3.81e-05 | 5.4e-05  | 4.51e-06 | 0.000135% |
| OTU_6051  | True  | OD1      | 4.62e-06 | 0.00042%  | 0.0 | 1 | 0.000124 | 0.0      | 0.0      | 9.21e-06 | 0.000276% |
| OTU_7480  | True  | ABY1     | 4.59e-06 | 0.000418% | 0.0 | 1 | 0.0      | 0.000811 | 0.000513 | 1.43e-05 | 0.000428% |
| OTU_6306  | True  | ZB2      | 4.59e-06 | 0.000418% | 0.0 | 1 | 0.00145  | 8.02e-05 | 0.00045  | 1.6e-05  | 0.000481% |
| OTU_7962  | True  | ABY1     | 4.59e-06 | 0.000417% | 0.0 | 1 | 0.000766 | 0.000279 | 0.000216 | 3.34e-05 | 0.001%    |
| L1181     | False | GIF10    | 4.58e-06 | 0.000417% | 0.0 | 1 | 0.00197  | 0.000213 | 0.000219 | 7.71e-06 | 0.000231% |
| L1874     | False | OD1      | 4.56e-06 | 0.000415% | 0.0 | 1 | 0.00108  | 0.000482 | 5.3e-05  | 1.17e-05 | 0.000353% |
| OTU_7046  | True  | ABY1     | 4.54e-06 | 0.000413% | 0.0 | 1 | 0.000861 | 5.62e-05 | 0.0      | 1.08e-05 | 0.000324% |
| OTU_10859 | True  | OP11     | 4.5e-06  | 0.000409% | 0.0 | 1 | 0.000556 | 0.000101 | 4.16e-07 | 1.28e-05 | 0.000384% |
| OTU_7050  | True  | ABY1     | 4.48e-06 | 0.000408% | 0.0 | 1 | 0.000654 | 0.000227 | 0.00013  | 2.75e-05 | 0.000826% |
| OTU_8826  | True  | TM7-1    | 4.48e-06 | 0.000407% | 0.0 | 1 | 0.000454 | 0.0      | 0.0      | 9.08e-06 | 0.000273% |
| OTU_6185  | True  | ABY1     | 4.47e-06 | 0.000407% | 0.0 | 1 | 0.000325 | 8.41e-05 | 1.14e-05 | 1.6e-05  | 0.00048%  |
| OTU_7217  | True  | ZB2      | 4.47e-06 | 0.000407% | 0.0 | 1 | 0.000241 | 0.0      | 0.0      | 8.27e-06 | 0.000248% |
| L407      | False | ABY1     | 4.46e-06 | 0.000406% | 0.0 | 1 | 0.000277 | 7.44e-06 | 1.02e-05 | 9.19e-06 | 0.000276% |
| OTU_7379  | True  | ZB2      | 4.45e-06 | 0.000405% | 0.0 | 1 | 0.000267 | 0.0      | 0.0      | 8.29e-06 | 0.000249% |
| OTU_348   | True  | koll11   | 4.44e-06 | 0.000404% | 0.0 | 1 | 0.000472 | 1.98e-05 | 0.000254 | 2.34e-05 | 0.000703% |
| OTU_8139  | True  | EW055    | 4.41e-06 | 0.000401% | 0.0 | 1 | 0.00138  | 4.1e-07  | 2.4e-05  | 6.99e-06 | 0.00021%  |
| OTU_8036  | True  | TM7-1    | 4.39e-06 | 0.0004%   | 0.0 | 1 | 0.000563 | 2.84e-05 | 3.14e-06 | 5.23e-06 | 0.000157% |
| OTU_8913  | True  | Mb-NB09  | 4.39e-06 | 0.000399% | 0.0 | 1 | 0.000207 | 0.0      | 0.0      | 7.86e-06 | 0.000236% |
| OTU_8793  | True  | OD1      | 4.37e-06 | 0.000398% | 0.0 | 1 | 3.42e-06 | 0.000341 | 0.000551 | 1.72e-05 | 0.000516% |
| OTU_6343  | True  | ZB2      | 4.33e-06 | 0.000394% | 0.0 | 1 | 0.00215  | 0.000755 | 0.00088  | 4.9e-05  | 0.00147%  |
| OTU_9347  | True  | Mb-NB09  | 4.31e-06 | 0.000392% | 0.0 | 1 | 0.00039  | 4.88e-05 | 1.42e-07 | 8.59e-06 | 0.000258% |
| OTU_1425  | True  | OP3      | 4.31e-06 | 0.000392% | 0.0 | 1 | 0.000339 | 6.85e-05 | 0.0      | 9.83e-06 | 0.000295% |
| OTU_3671  | True  | kpj58rc  | 4.29e-06 | 0.000391% | 0.0 | 1 | 0.000387 | 2.78e-05 | 7.86e-05 | 7.84e-06 | 0.000235% |
| OTU_8317  | True  | Mb-NB09  | 4.29e-06 | 0.00039%  | 0.0 | 1 | 0.000531 | 0.000184 | 3.24e-05 | 1.79e-05 | 0.000536% |
| OTU_6679  | True  | OD1      | 4.29e-06 | 0.00039%  | 0.0 | 1 | 0.00106  | 0.00019  | 0.000123 | 1.73e-05 | 0.000519% |
| OTU_6604  | True  | ZB2      | 4.28e-06 | 0.00039%  | 0.0 | 1 | 0.0      | 6.05e-06 | 0.000522 | 1.41e-05 | 0.000423% |
| OTU_165   | True  | koll11   | 4.26e-06 | 0.000388% | 0.0 | 1 | 0.0143   | 0.00232  | 0.00165  | 5.21e-06 | 0.000156% |
| OTU_5847  | True  | OD1      | 4.26e-06 | 0.000388% | 0.0 | 1 | 0.000334 | 9.99e-06 | 2.9e-05  | 1.08e-05 | 0.000324% |
| OTU_6108  | True  | ZB2      | 4.25e-06 | 0.000387% | 0.0 | 1 | 0.0      | 0.000262 | 1.77e-06 | 8.65e-06 | 0.00026%  |
| L299      | False | ABY1     | 4.25e-06 | 0.000387% | 0.0 | 1 | 0.000697 | 0.00999  | 0.00618  | 1.15e-05 | 0.000344% |
| OTU_7022  | True  | ABY1     | 4.25e-06 | 0.000386% | 0.0 | 1 | 0.00153  | 0.00654  | 0.00543  | 4.29e-05 | 0.00129%  |
| OTU_5424  | True  | ZB2      | 4.24e-06 | 0.000386% | 0.0 | 1 | 0.000473 | 7.55e-06 | 5.98e-05 | 8.11e-06 | 0.000243% |
| OTU_5575  | True  | ZB2      | 4.19e-06 | 0.000381% | 0.0 | 1 | 0.00012  | 0.0      | 5.5e-07  | 8.71e-06 | 0.000261% |
| OTU_6123  | True  | SM2F11   | 4.19e-06 | 0.000381% | 0.0 | 1 | 0.00023  | 0.0      | 0.0      | 7.3e-06  | 0.000219% |
| OTU_1344  | True  | PBS-25   | 4.18e-06 | 0.00038%  | 0.0 | 1 | 3.5e-05  | 0.0      | 0.0017   | 1.15e-05 | 0.000346% |
| L1706     | False | Mb-NB09  | 4.18e-06 | 0.00038%  | 0.0 | 1 | 0.00124  | 0.000119 | 3.61e-05 | 5.36e-06 | 0.000161% |
| L529      | False | TM6      | 4.15e-06 | 0.000378% | 0.0 | 1 | 0.000164 | 0.00201  | 0.000134 | 2.13e-05 | 0.000639% |
| L565      | False | SJA-4    | 4.15e-06 | 0.000378% | 0.0 | 1 | 0.00132  | 3.47e-07 | 0.000456 | 1.71e-05 | 0.000512% |
| OTU_3763  | True  | OP3      | 4.14e-06 | 0.000377% | 0.0 | 1 | 0.000192 | 0.0      | 0.0      | 1.01e-05 | 0.000302% |
| OTU_7969  | True  | ABY1     | 4.12e-06 | 0.000375% | 0.0 | 1 | 0.000532 | 0.000194 | 8.78e-06 | 8.97e-06 | 0.000269% |
| OTU_6349  | True  | WCHB1-64 | 4.12e-06 | 0.000375% | 0.0 | 1 | 0.000271 | 4.72e-05 | 0.00117  | 1.94e-05 | 0.000583% |
| L1182     | False | GIF10    | 4.11e-06 | 0.000374% | 0.0 | 1 | 0.001    | 6.93e-05 | 0.000164 | 1.4e-05  | 0.00042%  |
| L498      | False | OP11-4   | 4.11e-06 | 0.000374% | 0.0 | 1 | 0.000582 | 4.23e-05 | 3.88e-05 | 6.82e-06 | 0.000205% |
| OTU_4064  | True  | koll11   | 4.08e-06 | 0.000371% | 0.0 | 1 | 0.000317 | 3.03e-05 | 6.35e-06 | 1.28e-05 | 0.000384% |
| OTU_7000  | True  | ZB2      | 4.07e-06 | 0.000371% | 0.0 | 1 | 1.39e-06 | 0.000603 | 0.000268 | 1.37e-05 | 0.000413% |
| L1241     | False | TM7      | 4.07e-06 | 0.00037%  | 0.0 | 1 | 0.0117   | 0.012    | 0.021    | 0.000135 | 0.00404%  |
| OTU_10777 | True  | OP11-3   | 4.03e-06 | 0.000367% | 0.0 | 1 | 0.000119 | 0.000339 | 0.0      | 2.44e-05 | 0.000733% |
| L1888     | False | OD1      | 4.03e-06 | 0.000367% | 0.0 | 1 | 0.000325 | 5.87e-05 | 8.28e-06 | 1.13e-05 | 0.000341% |

|           |       |        |          |           |     |   |          |          |          |          |           |
|-----------|-------|--------|----------|-----------|-----|---|----------|----------|----------|----------|-----------|
| OTU_6230  | True  | ZB2    | 4.03e-06 | 0.000367% | 0.0 | 1 | 0.000139 | 0.0131   | 0.0056   | 1.27e-05 | 0.000381% |
| OTU_9264  | True  | ABY1   | 4.02e-06 | 0.000366% | 0.0 | 1 | 0.000249 | 1.93e-05 | 2.55e-06 | 1.01e-05 | 0.000302% |
| L917      | False | OP3    | 4.02e-06 | 0.000366% | 0.0 | 1 | 0.00053  | 6.85e-05 | 0.0      | 7.43e-06 | 0.000223% |
| L207      | False | ABY1   | 4.01e-06 | 0.000365% | 0.0 | 1 | 0.00143  | 3.45e-05 | 1.77e-05 | 4.74e-06 | 0.000142% |
| OTU_499   | True  | PBS-25 | 3.99e-06 | 0.000363% | 0.0 | 1 | 0.000313 | 0.0      | 0.0      | 5.05e-06 | 0.000152% |
| OTU_436   | True  | koll11 | 3.99e-06 | 0.000363% | 0.0 | 1 | 0.000386 | 0.0      | 1.77e-06 | 8.45e-06 | 0.000253% |
| L132      | False | OD1    | 3.97e-06 | 0.000361% | 0.0 | 1 | 0.011    | 0.0308   | 0.0167   | 3.3e-05  | 0.000991% |
| L144      | False | ABY1   | 3.96e-06 | 0.00036%  | 0.0 | 1 | 0.00245  | 0.00149  | 0.000234 | 2.06e-05 | 0.000617% |
| OTU_7670  | True  | ABY1   | 3.95e-06 | 0.000359% | 0.0 | 1 | 0.000341 | 1.56e-07 | 1.54e-05 | 7.78e-06 | 0.000234% |
| L253      | False | ABY1   | 3.94e-06 | 0.000358% | 0.0 | 1 | 0.000596 | 0.000139 | 1.93e-05 | 8.33e-06 | 0.00025%  |
| OTU_8067  | True  | OD1    | 3.92e-06 | 0.000357% | 0.0 | 1 | 0.000268 | 6.63e-05 | 0.0      | 1.23e-05 | 0.00037%  |
| OTU_571   | True  | koll11 | 3.92e-06 | 0.000357% | 0.0 | 1 | 0.000224 | 0.0      | 0.0      | 7.11e-06 | 0.000213% |
| L1422     | False | ZB2    | 3.91e-06 | 0.000356% | 0.0 | 1 | 0.000105 | 0.00214  | 0.0022   | 1.63e-05 | 0.00049%  |
| L311      | False | ABY1   | 3.91e-06 | 0.000356% | 0.0 | 1 | 2.34e-05 | 0.00134  | 0.00102  | 9.92e-06 | 0.000298% |
| L954      | False | koll11 | 3.9e-06  | 0.000355% | 0.0 | 1 | 0.00135  | 0.000238 | 6.32e-05 | 6.63e-06 | 0.000199% |
| OTU_3064  | True  | koll11 | 3.89e-06 | 0.000354% | 0.0 | 1 | 0.000847 | 8.98e-05 | 3.33e-05 | 5.7e-06  | 0.000171% |
| L1553     | False | ZB2    | 3.86e-06 | 0.000351% | 0.0 | 1 | 0.00465  | 0.00135  | 0.000553 | 9.47e-06 | 0.000284% |
| L1900     | False | OD1    | 3.85e-06 | 0.000351% | 0.0 | 1 | 0.00045  | 0.00016  | 5.8e-05  | 2e-05    | 0.000601% |
| OTU_753   | True  | koll11 | 3.85e-06 | 0.000351% | 0.0 | 1 | 0.000426 | 4.23e-06 | 0.0      | 8.16e-06 | 0.000245% |
| L544      | False | SJA-4  | 3.85e-06 | 0.00035%  | 0.0 | 1 | 0.000928 | 0.000181 | 0.00167  | 3.07e-05 | 0.000922% |
| L1866     | False | OD1    | 3.85e-06 | 0.00035%  | 0.0 | 1 | 0.0013   | 0.000116 | 0.000142 | 6.09e-06 | 0.000183% |
| OTU_7970  | True  | ABY1   | 3.84e-06 | 0.00035%  | 0.0 | 1 | 1.38e-05 | 0.000658 | 0.000339 | 2.14e-05 | 0.000642% |
| L1192     | False | koll11 | 3.82e-06 | 0.000348% | 0.0 | 1 | 0.000499 | 1.13e-05 | 3.38e-05 | 6.21e-06 | 0.000186% |
| OTU_1354  | True  | PBS-25 | 3.81e-06 | 0.000347% | 0.0 | 1 | 0.000726 | 0.0      | 0.0      | 8.52e-06 | 0.000256% |
| OTU_4583  | True  | ZB2    | 3.81e-06 | 0.000346% | 0.0 | 1 | 0.000942 | 8.3e-05  | 8.82e-05 | 9.12e-06 | 0.000274% |
| L477      | False | OP11-4 | 3.81e-06 | 0.000346% | 0.0 | 1 | 0.000855 | 0.000179 | 3.94e-05 | 6.73e-06 | 0.000202% |
| L426      | False | OP11   | 3.8e-06  | 0.000346% | 0.0 | 1 | 0.00113  | 0.000674 | 0.00173  | 5.73e-05 | 0.00172%  |
| L1046     | False | koll11 | 3.77e-06 | 0.000343% | 0.0 | 1 | 0.00741  | 0.00147  | 0.00386  | 2.07e-05 | 0.00062%  |
| L1864     | False | OD1    | 3.76e-06 | 0.000343% | 0.0 | 1 | 0.00251  | 0.0015   | 0.000205 | 1e-05    | 0.0003%   |
| L663      | False | koll11 | 3.76e-06 | 0.000342% | 0.0 | 1 | 0.00272  | 0.000121 | 0.000278 | 6.29e-06 | 0.000189% |
| OTU_6055  | True  | ABY1   | 3.75e-06 | 0.000342% | 0.0 | 1 | 0.000227 | 2.32e-05 | 0.0      | 7.83e-06 | 0.000235% |
| OTU_6013  | True  | ABY1   | 3.74e-06 | 0.00034%  | 0.0 | 1 | 0.000254 | 0.0      | 3.68e-06 | 5.49e-06 | 0.000165% |
| OTU_6     | True  | OD1    | 3.73e-06 | 0.00034%  | 0.0 | 1 | 9.54e-05 | 0.0      | 0.0      | 8.95e-06 | 0.000269% |
| OTU_1374  | True  | PBS-25 | 3.73e-06 | 0.00034%  | 0.0 | 1 | 0.00176  | 4.88e-05 | 0.0      | 8.77e-06 | 0.000263% |
| OTU_10862 | True  | OP11-4 | 3.71e-06 | 0.000338% | 0.0 | 1 | 0.000725 | 0.000179 | 3.94e-05 | 8.24e-06 | 0.000247% |
| OTU_8782  | True  | ABY1   | 3.69e-06 | 0.000336% | 0.0 | 1 | 0.00207  | 7.47e-05 | 0.0      | 7.68e-06 | 0.00023%  |
| L1895     | False | OD1    | 3.69e-06 | 0.000336% | 0.0 | 1 | 0.00166  | 0.000556 | 0.000116 | 9.65e-06 | 0.00029%  |
| L133      | False | ABY1   | 3.67e-06 | 0.000334% | 0.0 | 1 | 0.00292  | 0.000456 | 0.000338 | 7.35e-06 | 0.000221% |
| L658      | False | koll11 | 3.66e-06 | 0.000334% | 0.0 | 1 | 0.00442  | 0.000827 | 0.00193  | 1.68e-05 | 0.000505% |
| OTU_67    | True  | ZB2    | 3.66e-06 | 0.000333% | 0.0 | 1 | 9.44e-05 | 0.0125   | 0.0182   | 4.93e-06 | 0.000148% |
| L826      | False | PBS-25 | 3.65e-06 | 0.000332% | 0.0 | 1 | 0.00479  | 0.000638 | 0.000416 | 8.05e-06 | 0.000241% |
| OTU_173   | True  | PBS-25 | 3.64e-06 | 0.000331% | 0.0 | 1 | 0.00101  | 9.46e-05 | 0.000662 | 3.02e-05 | 0.000907% |
| OTU_861   | True  | PBS-25 | 3.63e-06 | 0.000331% | 0.0 | 1 | 0.000698 | 0.0      | 0.0      | 1.03e-05 | 0.000311% |
| L377      | False | ABY1   | 3.62e-06 | 0.00033%  | 0.0 | 1 | 0.000324 | 0.0      | 5.83e-08 | 5.17e-06 | 0.000155% |
| OTU_6094  | True  | ZB2    | 3.61e-06 | 0.000329% | 0.0 | 1 | 4.62e-05 | 0.00191  | 0.00148  | 1.24e-05 | 0.000373% |
| OTU_6544  | True  | ZB2    | 3.61e-06 | 0.000329% | 0.0 | 1 | 0.0      | 0.0      | 0.00066  | 1.11e-05 | 0.000332% |
| OTU_8108  | True  | ABY1   | 3.61e-06 | 0.000329% | 0.0 | 1 | 0.0002   | 1.12e-05 | 1.42e-07 | 6.35e-06 | 0.00019%  |
| OTU_4797  | True  | koll11 | 3.6e-06  | 0.000328% | 0.0 | 1 | 1.62e-06 | 9.62e-06 | 0.00031  | 1.09e-05 | 0.000326% |
| OTU_318   | True  | koll11 | 3.58e-06 | 0.000326% | 0.0 | 1 | 0.00248  | 0.000327 | 0.00143  | 2.18e-05 | 0.000653% |
| L412      | False | ABY1   | 3.57e-06 | 0.000325% | 0.0 | 1 | 0.000295 | 0.000514 | 0.00154  | 3.13e-05 | 0.00094%  |
| OTU_7853  | True  | ABY1   | 3.54e-06 | 0.000322% | 0.0 | 1 | 0.000699 | 1.76e-05 | 1.52e-05 | 7.13e-06 | 0.000214% |
| L770      | False | PBS-25 | 3.54e-06 | 0.000322% | 0.0 | 1 | 0.00352  | 0.00035  | 0.000348 | 7.74e-06 | 0.000232% |
| OTU_8815  | True  | ABY1   | 3.53e-06 | 0.000321% | 0.0 | 1 | 0.000346 | 9.92e-06 | 0.0      | 1.01e-05 | 0.000303% |
| OTU_906   | True  | koll11 | 3.52e-06 | 0.000321% | 0.0 | 1 | 0.002    | 0.000388 | 5.94e-05 | 8.66e-06 | 0.00026%  |
| L1151     | False | koll11 | 3.52e-06 | 0.00032%  | 0.0 | 1 | 0.00187  | 0.000302 | 0.00013  | 8e-06    | 0.00024%  |
| OTU_7961  | True  | ZB2    | 3.51e-06 | 0.000319% | 0.0 | 1 | 0.000239 | 0.000144 | 8.45e-06 | 1.33e-05 | 0.0004%   |
| OTU_414   | True  | PRR-12 | 3.5e-06  | 0.000319% | 0.0 | 1 | 0.0023   | 0.000341 | 0.0      | 7.78e-06 | 0.000233% |
| OTU_1247  | True  | PRR-12 | 3.48e-06 | 0.000317% | 0.0 | 1 | 0.000882 | 4.47e-05 | 1.74e-05 | 7.15e-06 | 0.000215% |
| OTU_190   | True  | koll11 | 3.47e-06 | 0.000316% | 0.0 | 1 | 0.00338  | 0.00086  | 0.00464  | 2.67e-05 | 0.000802% |
| OTU_2521  | True  | koll11 | 3.46e-06 | 0.000315% | 0.0 | 1 | 0.000242 | 1.42e-06 | 2.8e-06  | 8.07e-06 | 0.000242% |
| OTU_1590  | True  | PBS-25 | 3.45e-06 | 0.000314% | 0.0 | 1 | 0.000323 | 9.86e-06 | 0.0      | 6.88e-06 | 0.000206% |
| OTU_1088  | True  | koll11 | 3.45e-06 | 0.000314% | 0.0 | 1 | 0.000542 | 0.0      | 2.8e-06  | 6.42e-06 | 0.000193% |
| L1540     | False | ZB2    | 3.45e-06 | 0.000314% | 0.0 | 1 | 0.000377 | 0.0      | 0.0      | 5.36e-06 | 0.000161% |
| L198      | False | ABY1   | 3.44e-06 | 0.000313% | 0.0 | 1 | 0.00113  | 0.000269 | 8.84e-06 | 5.92e-06 | 0.000178% |

|           |       |         |          |           |     |   |          |          |          |          |           |
|-----------|-------|---------|----------|-----------|-----|---|----------|----------|----------|----------|-----------|
| L1062     | False | koll11  | 3.44e-06 | 0.000313% | 0.0 | 1 | 0.00191  | 0.00031  | 0.000533 | 1.32e-05 | 0.000396% |
| L1121     | False | koll11  | 3.43e-06 | 0.000312% | 0.0 | 1 | 0.00197  | 0.000118 | 9.12e-05 | 4.69e-06 | 0.000141% |
| L1673     | False | OD1     | 3.42e-06 | 0.000312% | 0.0 | 1 | 0.00373  | 0.00094  | 0.000595 | 9.86e-06 | 0.000296% |
| L540      | False | SJA-4   | 3.42e-06 | 0.000312% | 0.0 | 1 | 0.00345  | 0.00132  | 0.00255  | 6.61e-05 | 0.00198%  |
| OTU_7122  | True  | ZB2     | 3.41e-06 | 0.00031%  | 0.0 | 1 | 0.000247 | 1.48e-05 | 1.57e-05 | 9.58e-06 | 0.000288% |
| L1727     | False | Mb-NB09 | 3.4e-06  | 0.00031%  | 0.0 | 1 | 0.00305  | 0.00142  | 0.000608 | 1.65e-05 | 0.000495% |
| L1263     | False | TM7-1   | 3.39e-06 | 0.000309% | 0.0 | 1 | 0.000875 | 0.0      | 0.0      | 4.79e-06 | 0.000144% |
| OTU_6328  | True  | ZB2     | 3.38e-06 | 0.000308% | 0.0 | 1 | 0.0      | 0.000798 | 0.000617 | 1.42e-05 | 0.000427% |
| OTU_5893  | True  | OD1     | 3.36e-06 | 0.000306% | 0.0 | 1 | 0.000143 | 0.0      | 0.0      | 7.04e-06 | 0.000211% |
| L1293     | False | TM7-3   | 3.36e-06 | 0.000306% | 0.0 | 1 | 0.00138  | 0.000105 | 0.00264  | 2.15e-05 | 0.000644% |
| OTU_4041  | True  | koll11  | 3.35e-06 | 0.000305% | 0.0 | 1 | 0.000474 | 0.0      | 0.0      | 6.81e-06 | 0.000204% |
| OTU_449   | True  | koll11  | 3.34e-06 | 0.000304% | 0.0 | 1 | 0.000348 | 3.11e-05 | 0.000252 | 2.02e-05 | 0.000607% |
| L1438     | False | ZB2     | 3.34e-06 | 0.000304% | 0.0 | 1 | 0.00174  | 0.000798 | 0.000219 | 1.62e-05 | 0.000487% |
| L1208     | False | koll11  | 3.34e-06 | 0.000304% | 0.0 | 1 | 0.0005   | 0.000123 | 0.0      | 1.17e-05 | 0.000351% |
| OTU_837   | True  | koll11  | 3.33e-06 | 0.000303% | 0.0 | 1 | 0.000787 | 0.000195 | 8.56e-05 | 1.64e-05 | 0.000492% |
| L636      | False | PBS-25  | 3.33e-06 | 0.000303% | 0.0 | 1 | 0.00091  | 7.9e-05  | 8.32e-06 | 5.92e-06 | 0.000178% |
| OTU_1305  | True  | TM6     | 3.32e-06 | 0.000302% | 0.0 | 1 | 1.82e-06 | 0.00188  | 0.000131 | 1.37e-05 | 0.000411% |
| OTU_8744  | True  | TM7-1   | 3.29e-06 | 0.000299% | 0.0 | 1 | 0.000115 | 0.0      | 0.0      | 7.82e-06 | 0.000235% |
| OTU_10795 | True  | OP11-3  | 3.28e-06 | 0.000298% | 0.0 | 1 | 6.42e-05 | 0.0      | 0.0      | 8.43e-06 | 0.000253% |
| OTU_6709  | True  | OD1     | 3.27e-06 | 0.000298% | 0.0 | 1 | 0.000193 | 0.0      | 0.0      | 4.52e-06 | 0.000136% |
| OTU_8039  | True  | ABY1    | 3.27e-06 | 0.000297% | 0.0 | 1 | 0.000384 | 0.0      | 0.0      | 5.95e-06 | 0.000179% |
| OTU_418   | True  | koll11  | 3.26e-06 | 0.000297% | 0.0 | 1 | 0.00241  | 2.94e-05 | 0.00121  | 1.27e-05 | 0.00038%  |
| OTU_8224  | True  | ABY1    | 3.26e-06 | 0.000296% | 0.0 | 1 | 9.77e-05 | 0.0      | 0.0      | 5.77e-06 | 0.000173% |
| OTU_57    | True  | Mb-NB09 | 3.25e-06 | 0.000296% | 0.0 | 1 | 5.02e-05 | 5.25e-06 | 0.0      | 1.1e-05  | 0.00033%  |
| OTU_5443  | True  | ZB2     | 3.25e-06 | 0.000296% | 0.0 | 1 | 0.000663 | 0.000303 | 0.000145 | 2.03e-05 | 0.00061%  |
| L1133     | False | koll11  | 3.24e-06 | 0.000295% | 0.0 | 1 | 0.00137  | 0.000213 | 3.12e-05 | 7.38e-06 | 0.000221% |
| OTU_335   | True  | koll11  | 3.21e-06 | 0.000292% | 0.0 | 1 | 0.00264  | 0.000501 | 0.000108 | 7.22e-06 | 0.000217% |
| OTU_5599  | True  | OD1     | 3.21e-06 | 0.000292% | 0.0 | 1 | 5.25e-05 | 0.000367 | 5.64e-06 | 1.16e-05 | 0.000347% |
| L1340     | False | ZB2     | 3.2e-06  | 0.000292% | 0.0 | 1 | 0.00109  | 0.000471 | 3.47e-05 | 8.67e-06 | 0.00026%  |
| L943      | False | koll11  | 3.2e-06  | 0.000291% | 0.0 | 1 | 0.00999  | 0.00204  | 0.00113  | 3.34e-06 | 0.0001%   |
| L1667     | False | OD1     | 3.18e-06 | 0.00029%  | 0.0 | 1 | 0.000629 | 0.000145 | 0.0      | 5.8e-06  | 0.000174% |
| L679      | False | koll11  | 3.18e-06 | 0.000289% | 0.0 | 1 | 0.00588  | 0.000273 | 0.000676 | 8.95e-06 | 0.000269% |
| L958      | False | koll11  | 3.18e-06 | 0.000289% | 0.0 | 1 | 0.000725 | 2.19e-05 | 4.92e-05 | 5.55e-06 | 0.000166% |
| L196      | False | ABY1    | 3.17e-06 | 0.000288% | 0.0 | 1 | 0.00132  | 0.00027  | 8.84e-06 | 5.18e-06 | 0.000156% |
| L1529     | False | ZB2     | 3.16e-06 | 0.000287% | 0.0 | 1 | 0.000833 | 0.000343 | 0.000152 | 1.47e-05 | 0.000442% |
| L1091     | False | koll11  | 3.15e-06 | 0.000287% | 0.0 | 1 | 0.011    | 0.00187  | 0.00186  | 4.79e-06 | 0.000144% |
| L118      | False | OD1     | 3.15e-06 | 0.000287% | 0.0 | 1 | 0.0134   | 0.0406   | 0.023    | 1.73e-05 | 0.000519% |
| OTU_8643  | True  | ABY1    | 3.14e-06 | 0.000286% | 0.0 | 1 | 0.000299 | 5.29e-06 | 5.5e-06  | 5.53e-06 | 0.000166% |
| L353      | False | OD1     | 3.13e-06 | 0.000285% | 0.0 | 1 | 0.00037  | 7.2e-05  | 1.2e-05  | 9.96e-06 | 0.000299% |
| OTU_2705  | True  | SJA-4   | 3.13e-06 | 0.000285% | 0.0 | 1 | 0.000148 | 0.000373 | 1.69e-05 | 2.44e-05 | 0.000731% |
| OTU_9026  | True  | ABY1    | 3.12e-06 | 0.000284% | 0.0 | 1 | 0.00041  | 4.5e-05  | 9.46e-05 | 7.75e-06 | 0.000233% |
| OTU_8865  | True  | TM7-1   | 3.12e-06 | 0.000284% | 0.0 | 1 | 0.0      | 0.000752 | 0.000233 | 1.71e-05 | 0.000512% |
| OTU_10899 | True  | OP11-4  | 3.12e-06 | 0.000284% | 0.0 | 1 | 0.000333 | 1.61e-06 | 0.0      | 6.74e-06 | 0.000202% |
| OTU_8146  | True  | ABY1    | 3.11e-06 | 0.000283% | 0.0 | 1 | 0.000159 | 0.0      | 0.0      | 6.44e-06 | 0.000193% |
| OTU_8122  | True  | ABY1    | 3.11e-06 | 0.000283% | 0.0 | 1 | 0.000215 | 1.23e-05 | 0.0      | 6.32e-06 | 0.00019%  |
| OTU_6088  | True  | ABY1    | 3.1e-06  | 0.000283% | 0.0 | 1 | 0.000537 | 7.22e-05 | 3.04e-05 | 9.74e-06 | 0.000292% |
| OTU_1449  | True  | PBS-25  | 3.1e-06  | 0.000282% | 0.0 | 1 | 0.0151   | 0.00193  | 0.00367  | 5.37e-06 | 0.000161% |
| OTU_6315  | True  | K2-4-19 | 3.1e-06  | 0.000282% | 0.0 | 1 | 0.000197 | 0.0      | 0.0      | 5.77e-06 | 0.000173% |
| L86       | False | ABY1    | 3.1e-06  | 0.000282% | 0.0 | 1 | 0.000949 | 5.62e-05 | 0.0      | 6.3e-06  | 0.000189% |
| OTU_343   | True  | koll11  | 3.09e-06 | 0.000281% | 0.0 | 1 | 0.000738 | 7.6e-05  | 0.000316 | 1.52e-05 | 0.000455% |
| OTU_1101  | True  | koll11  | 3.09e-06 | 0.000281% | 0.0 | 1 | 0.00135  | 0.000124 | 0.000325 | 1.13e-05 | 0.00034%  |
| L1274     | False | TM7     | 3.09e-06 | 0.000281% | 0.0 | 1 | 0.00069  | 0.000223 | 1.63e-05 | 1.39e-05 | 0.000418% |
| OTU_1020  | True  | PBS-25  | 3.08e-06 | 0.00028%  | 0.0 | 1 | 0.000389 | 0.0      | 2.81e-05 | 7.18e-06 | 0.000216% |
| L463      | False | OP11-4  | 3.07e-06 | 0.00028%  | 0.0 | 1 | 0.000307 | 8.11e-05 | 4.27e-06 | 9.62e-06 | 0.000289% |
| OTU_8527  | True  | ABY1    | 3.07e-06 | 0.00028%  | 0.0 | 1 | 4.32e-06 | 0.000125 | 0.000315 | 1.38e-05 | 0.000416% |
| OTU_6095  | True  | ZB2     | 3.07e-06 | 0.00028%  | 0.0 | 1 | 0.00143  | 0.000717 | 0.000127 | 1.73e-05 | 0.000518% |
| OTU_5496  | True  | ZB2     | 3.07e-06 | 0.00028%  | 0.0 | 1 | 0.00161  | 0.00107  | 0.000918 | 0.000104 | 0.00311%  |
| L500      | False | OP11-4  | 3.07e-06 | 0.000279% | 0.0 | 1 | 0.000335 | 4.1e-06  | 0.0      | 4.63e-06 | 0.000139% |
| OTU_6634  | True  | K2-4-19 | 3.06e-06 | 0.000278% | 0.0 | 1 | 0.000253 | 6.09e-06 | 0.0      | 3.67e-06 | 0.00011%  |
| L786      | False | PBS-25  | 3.03e-06 | 0.000276% | 0.0 | 1 | 0.0012   | 8.65e-05 | 0.000295 | 8.78e-06 | 0.000264% |
| L878      | False | koll11  | 3.03e-06 | 0.000276% | 0.0 | 1 | 0.00924  | 0.00314  | 0.00235  | 8.99e-06 | 0.00027%  |
| OTU_8023  | True  | ABY1    | 3.03e-06 | 0.000275% | 0.0 | 1 | 1.12e-05 | 0.000249 | 0.0      | 9.28e-06 | 0.000279% |
| L1564     | False | ZB2     | 3.02e-06 | 0.000275% | 0.0 | 1 | 0.00511  | 0.0012   | 0.000741 | 4.04e-06 | 0.000121% |
| OTU_6572  | True  | ZB2     | 3.01e-06 | 0.000274% | 0.0 | 1 | 0.00148  | 0.000459 | 4.01e-05 | 7.55e-06 | 0.000227% |

|          |       |          |          |           |     |   |          |          |          |          |           |
|----------|-------|----------|----------|-----------|-----|---|----------|----------|----------|----------|-----------|
| OTU_907  | True  | koll11   | 3e-06    | 0.000273% | 0.0 | 1 | 0.00316  | 0.000176 | 0.000751 | 5.43e-06 | 0.000163% |
| OTU_4008 | True  | koll11   | 2.99e-06 | 0.000272% | 0.0 | 1 | 0.00331  | 0.000229 | 0.000764 | 6.99e-06 | 0.00021%  |
| L1186    | False | GIF10    | 2.98e-06 | 0.000272% | 0.0 | 1 | 0.000294 | 0.0      | 0.0      | 4.32e-06 | 0.00013%  |
| OTU_8299 | True  | ABY1     | 2.98e-06 | 0.000271% | 0.0 | 1 | 1.42e-05 | 0.00124  | 0.00102  | 7.93e-06 | 0.000238% |
| L1703    | False | OD1      | 2.96e-06 | 0.00027%  | 0.0 | 1 | 0.000893 | 4.63e-05 | 0.0      | 4.93e-06 | 0.000148% |
| L720     | False | PBS-25   | 2.95e-06 | 0.000269% | 0.0 | 1 | 0.00325  | 0.000787 | 0.000492 | 9.48e-06 | 0.000285% |
| L1339    | False | ZB2      | 2.95e-06 | 0.000268% | 0.0 | 1 | 0.00164  | 0.000696 | 0.000174 | 8.7e-06  | 0.000261% |
| OTU_386  | True  | PBS-25   | 2.93e-06 | 0.000267% | 0.0 | 1 | 0.00143  | 0.0      | 3.33e-06 | 6.25e-06 | 0.000187% |
| OTU_6041 | True  | ZB2      | 2.93e-06 | 0.000267% | 0.0 | 1 | 0.0015   | 0.000541 | 0.000738 | 3.39e-05 | 0.00102%  |
| OTU_315  | True  | PBS-25   | 2.93e-06 | 0.000266% | 0.0 | 1 | 0.0041   | 0.000778 | 7.66e-05 | 4.14e-06 | 0.000124% |
| L586     | False | PRR-12   | 2.91e-06 | 0.000265% | 0.0 | 1 | 0.00186  | 5.55e-05 | 1.25e-05 | 3.26e-06 | 9.79e-05% |
| OTU_8916 | True  | MJK10    | 2.91e-06 | 0.000265% | 0.0 | 1 | 0.00074  | 0.00029  | 0.000562 | 4.95e-05 | 0.00148%  |
| OTU_4028 | True  | koll11   | 2.9e-06  | 0.000264% | 0.0 | 1 | 0.000652 | 4.96e-05 | 0.0      | 6.25e-06 | 0.000187% |
| OTU_6437 | True  | ZB2      | 2.89e-06 | 0.000263% | 0.0 | 1 | 0.000406 | 8.12e-05 | 7.05e-06 | 6.86e-06 | 0.000206% |
| OTU_4177 | True  | koll11   | 2.89e-06 | 0.000263% | 0.0 | 1 | 0.000676 | 6.15e-05 | 2.55e-05 | 7.52e-06 | 0.000226% |
| OTU_477  | True  | PRR-12   | 2.89e-06 | 0.000263% | 0.0 | 1 | 0.000753 | 0.0      | 0.0      | 6.29e-06 | 0.000189% |
| OTU_7009 | True  | ZB2      | 2.89e-06 | 0.000263% | 0.0 | 1 | 0.000359 | 0.0      | 0.0      | 5.84e-06 | 0.000175% |
| OTU_9291 | True  | ABY1     | 2.89e-06 | 0.000263% | 0.0 | 1 | 0.000238 | 2.02e-05 | 0.0      | 7.66e-06 | 0.00023%  |
| L242     | False | ABY1     | 2.87e-06 | 0.000262% | 0.0 | 1 | 0.0065   | 0.00147  | 0.000985 | 6.26e-06 | 0.000188% |
| OTU_5449 | True  | OD1      | 2.87e-06 | 0.000262% | 0.0 | 1 | 0.000655 | 9.22e-05 | 3.41e-05 | 5.57e-06 | 0.000167% |
| L1620    | False | ZB2      | 2.86e-06 | 0.000261% | 0.0 | 1 | 0.00171  | 0.00224  | 0.000688 | 4.13e-05 | 0.00124%  |
| OTU_495  | True  | koll11   | 2.86e-06 | 0.000261% | 0.0 | 1 | 0.00077  | 0.00015  | 0.0      | 7.66e-06 | 0.00023%  |
| OTU_8164 | True  | Mb-NB09  | 2.86e-06 | 0.00026%  | 0.0 | 1 | 0.000572 | 0.00104  | 4.89e-05 | 1.45e-05 | 0.000434% |
| OTU_9271 | True  | ABY1     | 2.84e-06 | 0.000258% | 0.0 | 1 | 0.000108 | 7.06e-07 | 0.0      | 5.94e-06 | 0.000178% |
| L102     | False | ABY1     | 2.84e-06 | 0.000258% | 0.0 | 1 | 0.00131  | 0.000126 | 1.21e-05 | 4.67e-06 | 0.00014%  |
| OTU_8664 | True  | OD1      | 2.82e-06 | 0.000256% | 0.0 | 1 | 0.000101 | 1.06e-06 | 0.0      | 7.47e-06 | 0.000224% |
| L747     | False | PBS-25   | 2.82e-06 | 0.000256% | 0.0 | 1 | 0.00763  | 0.000621 | 0.00253  | 6.5e-06  | 0.000195% |
| L848     | False | koll11   | 2.81e-06 | 0.000256% | 0.0 | 1 | 0.00598  | 0.000602 | 0.00294  | 1.19e-05 | 0.000357% |
| L550     | False | SJA-4    | 2.81e-06 | 0.000256% | 0.0 | 1 | 0.000551 | 0.0      | 0.00012  | 1.03e-05 | 0.00031%  |
| OTU_2347 | True  | SJA-4    | 2.8e-06  | 0.000255% | 0.0 | 1 | 0.000595 | 5.49e-05 | 4.49e-05 | 9.34e-06 | 0.00028%  |
| OTU_4757 | True  | ZB2      | 2.8e-06  | 0.000255% | 0.0 | 1 | 0.00034  | 0.000274 | 1.98e-05 | 1.94e-05 | 0.000584% |
| OTU_451  | True  | PRR-10   | 2.8e-06  | 0.000255% | 0.0 | 1 | 0.00827  | 0.00122  | 0.000468 | 3.82e-06 | 0.000115% |
| OTU_8832 | True  | Mb-NB09  | 2.79e-06 | 0.000254% | 0.0 | 1 | 0.00048  | 6.4e-06  | 1.81e-05 | 7e-06    | 0.00021%  |
| L1219    | False | koll11   | 2.78e-06 | 0.000253% | 0.0 | 1 | 0.000155 | 0.000275 | 0.0      | 1.85e-05 | 0.000554% |
| L398     | False | ABY1     | 2.78e-06 | 0.000253% | 0.0 | 1 | 0.001    | 0.000276 | 0.000132 | 1.14e-05 | 0.000342% |
| OTU_5902 | True  | OD1      | 2.77e-06 | 0.000252% | 0.0 | 1 | 0.00038  | 1.77e-07 | 5.48e-06 | 4.04e-06 | 0.000121% |
| OTU_4014 | True  | GIF10    | 2.77e-06 | 0.000252% | 0.0 | 1 | 0.0      | 9.68e-05 | 0.000368 | 1.7e-05  | 0.000511% |
| OTU_996  | True  | PBS-25   | 2.77e-06 | 0.000252% | 0.0 | 1 | 0.000551 | 1.6e-05  | 0.0      | 5.43e-06 | 0.000163% |
| OTU_552  | True  | koll11   | 2.77e-06 | 0.000252% | 0.0 | 1 | 0.00054  | 6.39e-05 | 1.61e-05 | 9.98e-06 | 0.000299% |
| OTU_395  | True  | koll11   | 2.76e-06 | 0.000252% | 0.0 | 1 | 0.000933 | 2.89e-05 | 6.94e-05 | 4.13e-06 | 0.000124% |
| OTU_9077 | True  | OD1      | 2.76e-06 | 0.000251% | 0.0 | 1 | 0.000346 | 0.0      | 2.8e-06  | 7.59e-06 | 0.000228% |
| OTU_288  | True  | PBS-25   | 2.75e-06 | 0.00025%  | 0.0 | 1 | 0.00182  | 0.000787 | 0.000488 | 1.83e-05 | 0.00055%  |
| L339     | False | OD1      | 2.74e-06 | 0.00025%  | 0.0 | 1 | 0.000674 | 5.8e-05  | 9.01e-06 | 6.34e-06 | 0.00019%  |
| OTU_7973 | True  | ABY1     | 2.74e-06 | 0.00025%  | 0.0 | 1 | 0.0      | 0.000638 | 0.000458 | 1.45e-05 | 0.000436% |
| OTU_600  | True  | PBS-25   | 2.74e-06 | 0.000249% | 0.0 | 1 | 0.000446 | 3.22e-06 | 2.47e-05 | 6.35e-06 | 0.00019%  |
| OTU_5236 | True  | OD1      | 2.73e-06 | 0.000249% | 0.0 | 1 | 0.000443 | 5.63e-05 | 2.8e-06  | 4.67e-06 | 0.00014%  |
| OTU_299  | True  | PBS-25   | 2.72e-06 | 0.000247% | 0.0 | 1 | 0.00119  | 0.000211 | 0.000225 | 7.6e-06  | 0.000228% |
| L1484    | False | ZB2      | 2.72e-06 | 0.000247% | 0.0 | 1 | 0.00344  | 0.00123  | 0.000578 | 9.09e-06 | 0.000273% |
| OTU_371  | True  | koll11   | 2.72e-06 | 0.000247% | 0.0 | 1 | 0.000562 | 0.000121 | 0.000266 | 1.87e-05 | 0.000562% |
| OTU_8249 | True  | ABY1     | 2.7e-06  | 0.000245% | 0.0 | 1 | 0.00169  | 0.000318 | 0.000188 | 9.09e-06 | 0.000273% |
| OTU_7966 | True  | ZB2      | 2.7e-06  | 0.000245% | 0.0 | 1 | 0.0      | 0.000347 | 6.39e-05 | 7.97e-06 | 0.000239% |
| OTU_35   | True  | GIF10    | 2.69e-06 | 0.000245% | 0.0 | 1 | 0.000728 | 0.0      | 1.17e-07 | 4.33e-06 | 0.00013%  |
| OTU_2207 | True  | PBS-25   | 2.69e-06 | 0.000245% | 0.0 | 1 | 0.00158  | 9.2e-05  | 0.000121 | 9.17e-06 | 0.000275% |
| OTU_9016 | True  | ABY1     | 2.68e-06 | 0.000244% | 0.0 | 1 | 0.000206 | 1.52e-05 | 5.83e-08 | 5.59e-06 | 0.000168% |
| OTU_833  | True  | koll11   | 2.66e-06 | 0.000242% | 0.0 | 1 | 0.00101  | 8.59e-06 | 1.77e-05 | 2.96e-06 | 8.88e-05% |
| OTU_1263 | True  | PBS-25   | 2.65e-06 | 0.000241% | 0.0 | 1 | 0.000387 | 0.0      | 0.0      | 5.62e-06 | 0.000169% |
| OTU_6568 | True  | ZB2      | 2.65e-06 | 0.000241% | 0.0 | 1 | 0.000209 | 0.0      | 0.0      | 4.86e-06 | 0.000146% |
| OTU_7945 | True  | ABY1     | 2.65e-06 | 0.000241% | 0.0 | 1 | 0.000366 | 8.14e-06 | 1.77e-05 | 5.72e-06 | 0.000172% |
| OTU_7944 | True  | ABY1     | 2.64e-06 | 0.000241% | 0.0 | 1 | 0.00043  | 0.0      | 2.43e-05 | 6.06e-06 | 0.000182% |
| L387     | False | Bacteria | 2.64e-06 | 0.000241% | 0.0 | 1 | 0.848    | 0.853    | 0.92     | 2.04e-05 | 0.000613% |
| OTU_2434 | True  | SBRH58   | 2.64e-06 | 0.00024%  | 0.0 | 1 | 0.0      | 9.97e-05 | 0.0      | 6.23e-06 | 0.000187% |
| L1730    | False | Mb-NB09  | 2.63e-06 | 0.00024%  | 0.0 | 1 | 0.00235  | 0.0013   | 0.000604 | 2.22e-05 | 0.000666% |
| L1612    | False | ZB2      | 2.62e-06 | 0.000239% | 0.0 | 1 | 0.00122  | 8.34e-05 | 2.51e-05 | 3.67e-06 | 0.00011%  |
| L252     | False | ABY1     | 2.62e-06 | 0.000238% | 0.0 | 1 | 0.000596 | 0.000235 | 3.87e-05 | 8.92e-06 | 0.000268% |
| OTU_5654 | True  | OD1      | 2.61e-06 | 0.000237% | 0.0 | 1 | 0.000102 | 0.0      | 0.0      | 5.52e-06 | 0.000166% |

|           |       |         |          |           |     |   |          |          |          |          |           |
|-----------|-------|---------|----------|-----------|-----|---|----------|----------|----------|----------|-----------|
| OTU_9156  | True  | Mb-NB09 | 2.61e-06 | 0.000237% | 0.0 | 1 | 0.000215 | 2.78e-05 | 0.0      | 8.04e-06 | 0.000241% |
| OTU_9728  | True  | ZB2     | 2.6e-06  | 0.000237% | 0.0 | 1 | 0.000136 | 8.63e-06 | 0.0      | 6.78e-06 | 0.000203% |
| L206      | False | ABY1    | 2.59e-06 | 0.000236% | 0.0 | 1 | 0.00165  | 0.000284 | 1.77e-05 | 4.73e-06 | 0.000142% |
| L204      | False | ABY1    | 2.58e-06 | 0.000235% | 0.0 | 1 | 0.00165  | 0.000317 | 0.000605 | 1.23e-05 | 0.000369% |
| L1077     | False | koll11  | 2.57e-06 | 0.000234% | 0.0 | 1 | 0.00178  | 0.000112 | 0.0      | 4.26e-06 | 0.000128% |
| L1666     | False | OD1     | 2.57e-06 | 0.000234% | 0.0 | 1 | 0.00295  | 0.00181  | 0.00056  | 1.23e-05 | 0.00037%  |
| OTU_7005  | True  | ZB2     | 2.57e-06 | 0.000234% | 0.0 | 1 | 0.000267 | 0.0      | 0.0      | 5.49e-06 | 0.000165% |
| OTU_10779 | True  | OP11-4  | 2.57e-06 | 0.000234% | 0.0 | 1 | 0.000849 | 0.000174 | 4.02e-05 | 4.52e-06 | 0.000136% |
| OTU_7212  | True  | ZB2     | 2.56e-06 | 0.000233% | 0.0 | 1 | 0.000148 | 3.99e-06 | 2.35e-07 | 5.72e-06 | 0.000172% |
| OTU_5493  | True  | ZB2     | 2.55e-06 | 0.000232% | 0.0 | 1 | 0.000566 | 0.0      | 0.0      | 3.18e-06 | 9.54e-05% |
| L1726     | False | Mb-NB09 | 2.55e-06 | 0.000232% | 0.0 | 1 | 0.00321  | 0.00148  | 0.000738 | 1.25e-05 | 0.000374% |
| OTU_5588  | True  | OD1     | 2.54e-06 | 0.000232% | 0.0 | 1 | 0.000619 | 1.32e-05 | 8.64e-06 | 4.58e-06 | 0.000138% |
| OTU_5931  | True  | OD1     | 2.54e-06 | 0.000231% | 0.0 | 1 | 0.000801 | 0.000116 | 6.94e-05 | 6.28e-06 | 0.000188% |
| L1695     | False | Mb-NB09 | 2.54e-06 | 0.000231% | 0.0 | 1 | 0.000955 | 0.000236 | 4.65e-05 | 4.77e-06 | 0.000143% |
| L1858     | False | OD1     | 2.53e-06 | 0.00023%  | 0.0 | 1 | 0.000259 | 8.2e-07  | 1.54e-05 | 4.48e-06 | 0.000134% |
| OTU_7138  | True  | ABY1    | 2.52e-06 | 0.00023%  | 0.0 | 1 | 5.73e-05 | 1.06e-05 | 0.000782 | 8.59e-06 | 0.000258% |
| L1521     | False | ZB2     | 2.52e-06 | 0.000229% | 0.0 | 1 | 0.00203  | 0.000663 | 8.04e-05 | 5.03e-06 | 0.000151% |
| OTU_7383  | True  | ABY1    | 2.52e-06 | 0.000229% | 0.0 | 1 | 0.000239 | 1.9e-05  | 0.0      | 5.8e-06  | 0.000174% |
| L15       | False | ABY1    | 2.51e-06 | 0.000229% | 0.0 | 1 | 0.00125  | 0.00078  | 0.0      | 1.05e-05 | 0.000316% |
| L554      | False | SJA-4   | 2.51e-06 | 0.000228% | 0.0 | 1 | 0.000595 | 0.00027  | 4.59e-05 | 1.6e-05  | 0.00048%  |
| OTU_5495  | True  | ZB2     | 2.51e-06 | 0.000228% | 0.0 | 1 | 0.000589 | 0.000128 | 7.77e-06 | 6.89e-06 | 0.000207% |
| L1001     | False | koll11  | 2.5e-06  | 0.000228% | 0.0 | 1 | 0.00164  | 0.000538 | 0.000805 | 2.39e-05 | 0.000716% |
| OTU_29    | True  | ZB2     | 2.5e-06  | 0.000228% | 0.0 | 1 | 0.00151  | 0.000322 | 0.000462 | 9.07e-06 | 0.000272% |
| L1819     | False | OD1     | 2.5e-06  | 0.000228% | 0.0 | 1 | 0.00112  | 0.000233 | 2.88e-05 | 6.57e-06 | 0.000197% |
| OTU_6057  | True  | ABY1    | 2.49e-06 | 0.000227% | 0.0 | 1 | 0.000323 | 6.92e-05 | 0.0      | 1.13e-05 | 0.000338% |
| L238      | False | ABY1    | 2.48e-06 | 0.000226% | 0.0 | 1 | 0.000741 | 1.77e-06 | 2.25e-05 | 4.8e-06  | 0.000144% |
| OTU_4894  | True  | GIF10   | 2.48e-06 | 0.000226% | 0.0 | 1 | 0.000191 | 0.0      | 0.0      | 5.23e-06 | 0.000157% |
| L1850     | False | OD1     | 2.47e-06 | 0.000225% | 0.0 | 1 | 0.000265 | 7.74e-06 | 6.45e-05 | 9.27e-06 | 0.000278% |
| L886      | False | koll11  | 2.47e-06 | 0.000225% | 0.0 | 1 | 0.00146  | 0.00145  | 0.000255 | 1.73e-05 | 0.000519% |
| OTU_8159  | True  | ABY1    | 2.46e-06 | 0.000224% | 0.0 | 1 | 0.0      | 0.000228 | 5.45e-06 | 9.57e-06 | 0.000287% |
| OTU_5515  | True  | ZB2     | 2.44e-06 | 0.000222% | 0.0 | 1 | 0.000305 | 1.6e-06  | 5.5e-07  | 5.37e-06 | 0.000161% |
| L1896     | False | OD1     | 2.42e-06 | 0.000222% | 0.0 | 1 | 0.000912 | 0.000219 | 2.74e-05 | 5.1e-06  | 0.000153% |
| OTU_3125  | True  | koll11  | 2.42e-06 | 0.000222% | 0.0 | 1 | 0.000353 | 0.000403 | 1.57e-05 | 1.76e-05 | 0.000528% |
| L1517     | False | OD1     | 2.42e-06 | 0.000222% | 0.0 | 1 | 0.00053  | 0.000136 | 0.00101  | 1.65e-05 | 0.000495% |
| OTU_2634  | True  | PBS-25  | 2.41e-06 | 0.000219% | 0.0 | 1 | 0.00284  | 0.000459 | 0.000428 | 6.55e-06 | 0.000196% |
| OTU_5995  | True  | SM2F11  | 2.41e-06 | 0.000219% | 0.0 | 1 | 0.000209 | 3.15e-05 | 0.000161 | 1.65e-05 | 0.000496% |
| OTU_6591  | True  | ZB2     | 2.4e-06  | 0.000219% | 0.0 | 1 | 0.000285 | 0.0      | 0.0      | 4.86e-06 | 0.000146% |
| OTU_4491  | True  | koll11  | 2.4e-06  | 0.000218% | 0.0 | 1 | 0.000225 | 0.0      | 0.0      | 5.06e-06 | 0.000152% |
| OTU_6662  | True  | ZB2     | 2.38e-06 | 0.000217% | 0.0 | 1 | 6.32e-07 | 0.000395 | 0.00104  | 9.35e-06 | 0.000281% |
| L1803     | False | OD1     | 2.38e-06 | 0.000216% | 0.0 | 1 | 0.000614 | 0.0      | 0.0      | 3.19e-06 | 9.56e-05% |
| OTU_5240  | True  | ZB2     | 2.38e-06 | 0.000216% | 0.0 | 1 | 0.000351 | 0.000183 | 7.2e-06  | 8.53e-06 | 0.000256% |
| OTU_8868  | True  | ABY1    | 2.37e-06 | 0.000216% | 0.0 | 1 | 0.00013  | 2.44e-05 | 6.59e-07 | 6.19e-06 | 0.000186% |
| OTU_6835  | True  | OD1     | 2.37e-06 | 0.000216% | 0.0 | 1 | 0.000132 | 0.00055  | 1.29e-05 | 1.37e-05 | 0.000411% |
| OTU_6231  | True  | ZB2     | 2.37e-06 | 0.000216% | 0.0 | 1 | 3.34e-06 | 0.000318 | 1.02e-06 | 6.56e-06 | 0.000197% |
| OTU_608   | True  | koll11  | 2.37e-06 | 0.000215% | 0.0 | 1 | 0.00323  | 0.000533 | 0.00079  | 6.21e-06 | 0.000186% |
| L1196     | False | koll11  | 2.36e-06 | 0.000215% | 0.0 | 1 | 0.00269  | 0.00159  | 0.000608 | 1.57e-05 | 0.000472% |
| OTU_5881  | True  | OD1     | 2.35e-06 | 0.000214% | 0.0 | 1 | 0.000605 | 0.000171 | 0.000202 | 1.12e-05 | 0.000335% |
| OTU_6966  | True  | OD1     | 2.34e-06 | 0.000213% | 0.0 | 1 | 0.000234 | 0.0      | 0.0      | 4.7e-06  | 0.000141% |
| OTU_52    | True  | ZB2     | 2.34e-06 | 0.000213% | 0.0 | 1 | 0.000143 | 7.1e-06  | 0.0      | 5.6e-06  | 0.000168% |
| L935      | False | koll11  | 2.33e-06 | 0.000212% | 0.0 | 1 | 0.000865 | 0.000154 | 0.0      | 5.37e-06 | 0.000161% |
| OTU_7327  | True  | ABY1    | 2.32e-06 | 0.000212% | 0.0 | 1 | 4.06e-07 | 0.000516 | 7.37e-05 | 5.26e-06 | 0.000158% |
| OTU_8012  | True  | ZB2     | 2.32e-06 | 0.000211% | 0.0 | 1 | 0.00148  | 0.00085  | 0.000156 | 1.63e-05 | 0.000488% |
| OTU_5343  | True  | ZB2     | 2.31e-06 | 0.00021%  | 0.0 | 1 | 0.000561 | 6.67e-05 | 2.23e-05 | 4.98e-06 | 0.000149% |
| L1590     | False | OD1     | 2.31e-06 | 0.00021%  | 0.0 | 1 | 0.0109   | 0.0144   | 0.00629  | 2.71e-05 | 0.000813% |
| L1616     | False | ZB2     | 2.3e-06  | 0.000209% | 0.0 | 1 | 0.000492 | 1.85e-05 | 4.63e-05 | 5.75e-06 | 0.000172% |
| OTU_7843  | True  | ABY1    | 2.29e-06 | 0.000208% | 0.0 | 1 | 0.00278  | 0.00169  | 0.00016  | 9.61e-06 | 0.000288% |
| L460      | False | OP11-4  | 2.28e-06 | 0.000208% | 0.0 | 1 | 0.000689 | 9.41e-05 | 0.00053  | 1.4e-05  | 0.000419% |
| OTU_328   | True  | koll11  | 2.28e-06 | 0.000207% | 0.0 | 1 | 0.000341 | 0.0      | 0.0      | 4.68e-06 | 0.00014%  |
| OTU_8163  | True  | ABY1    | 2.27e-06 | 0.000207% | 0.0 | 1 | 0.000198 | 0.000152 | 0.0      | 1.28e-05 | 0.000385% |
| L1075     | False | koll11  | 2.26e-06 | 0.000206% | 0.0 | 1 | 0.00199  | 0.000112 | 0.0      | 3.25e-06 | 9.74e-05% |
| L558      | False | SJA-4   | 2.26e-06 | 0.000206% | 0.0 | 1 | 0.00186  | 0.000761 | 0.0006   | 2.66e-05 | 0.000799% |
| OTU_1583  | True  | koll11  | 2.26e-06 | 0.000206% | 0.0 | 1 | 0.000223 | 3.19e-06 | 1.23e-05 | 5.2e-06  | 0.000156% |
| OTU_8180  | True  | EW055   | 2.26e-06 | 0.000205% | 0.0 | 1 | 0.0      | 0.0      | 0.000806 | 5.78e-06 | 0.000174% |
| OTU_7231  | True  | ABY1    | 2.25e-06 | 0.000205% | 0.0 | 1 | 0.000235 | 0.0      | 0.0      | 3.46e-06 | 0.000104% |
| OTU_5490  | True  | Mb-NB09 | 2.24e-06 | 0.000204% | 0.0 | 1 | 0.000622 | 4.53e-05 | 0.0      | 5.29e-06 | 0.000159% |

|           |       |         |          |           |     |   |          |          |          |          |           |
|-----------|-------|---------|----------|-----------|-----|---|----------|----------|----------|----------|-----------|
| L655      | False | koll11  | 2.23e-06 | 0.000203% | 0.0 | 1 | 0.00854  | 0.00113  | 0.00272  | 4.24e-06 | 0.000127% |
| OTU_2809  | True  | SJA-4   | 2.21e-06 | 0.000201% | 0.0 | 1 | 0.0      | 0.000186 | 0.0      | 6.09e-06 | 0.000183% |
| OTU_7052  | True  | ABY1    | 2.21e-06 | 0.000201% | 0.0 | 1 | 0.0009   | 7.76e-05 | 0.0      | 5.6e-06  | 0.000168% |
| L1631     | False | ZB2     | 2.2e-06  | 0.0002%   | 0.0 | 1 | 0.00296  | 0.00174  | 0.00124  | 3.38e-05 | 0.00101%  |
| OTU_2801  | True  | PBS-25  | 2.2e-06  | 0.0002%   | 0.0 | 1 | 1.37e-05 | 0.000307 | 5.83e-08 | 6.69e-06 | 0.000201% |
| L734      | False | PBS-25  | 2.2e-06  | 0.0002%   | 0.0 | 1 | 0.0053   | 0.000989 | 0.000302 | 2.87e-06 | 8.63e-05% |
| L1344     | False | ZB2     | 2.2e-06  | 0.0002%   | 0.0 | 1 | 0.000483 | 0.000277 | 1.98e-05 | 9.79e-06 | 0.000294% |
| L1185     | False | GIF10   | 2.19e-06 | 0.000199% | 0.0 | 1 | 0.000975 | 0.000144 | 5.51e-05 | 3.81e-06 | 0.000114% |
| OTU_5528  | True  | ZB2     | 2.18e-06 | 0.000199% | 0.0 | 1 | 0.00017  | 4.08e-05 | 6.68e-06 | 6.54e-06 | 0.000196% |
| L1628     | False | ZB2     | 2.18e-06 | 0.000199% | 0.0 | 1 | 0.00493  | 0.00259  | 0.00139  | 1.62e-05 | 0.000486% |
| OTU_1282  | True  | PRR-12  | 2.18e-06 | 0.000199% | 0.0 | 1 | 0.00057  | 3.65e-05 | 1.57e-06 | 4.71e-06 | 0.000141% |
| L1351     | False | OD1     | 2.17e-06 | 0.000198% | 0.0 | 1 | 0.00302  | 0.00146  | 0.00121  | 2.65e-05 | 0.000795% |
| L1648     | False | ZB2     | 2.17e-06 | 0.000198% | 0.0 | 1 | 0.000375 | 0.000153 | 8.45e-06 | 6.21e-06 | 0.000187% |
| L1087     | False | koll11  | 2.16e-06 | 0.000197% | 0.0 | 1 | 0.000572 | 0.000143 | 6.83e-05 | 8.15e-06 | 0.000245% |
| OTU_6469  | True  | OD1     | 2.16e-06 | 0.000196% | 0.0 | 1 | 0.00276  | 0.000486 | 0.000254 | 5.36e-06 | 0.000161% |
| OTU_7975  | True  | ABY1    | 2.16e-06 | 0.000196% | 0.0 | 1 | 0.00093  | 0.000584 | 5.62e-06 | 8.13e-06 | 0.000244% |
| OTU_5531  | True  | OD1     | 2.15e-06 | 0.000196% | 0.0 | 1 | 0.000271 | 1.02e-06 | 0.0      | 3.85e-06 | 0.000115% |
| OTU_6282  | True  | OD1     | 2.15e-06 | 0.000196% | 0.0 | 1 | 0.0      | 0.000119 | 0.0      | 5.87e-06 | 0.000176% |
| OTU_310   | True  | koll11  | 2.15e-06 | 0.000196% | 0.0 | 1 | 0.000763 | 0.000213 | 3.12e-05 | 9.59e-06 | 0.000288% |
| L1525     | False | ZB2     | 2.15e-06 | 0.000196% | 0.0 | 1 | 0.000436 | 0.000204 | 3.97e-05 | 9.34e-06 | 0.00028%  |
| OTU_227   | True  | koll11  | 2.14e-06 | 0.000195% | 0.0 | 1 | 0.00157  | 0.000279 | 0.000281 | 8.24e-06 | 0.000247% |
| OTU_7983  | True  | ABY1    | 2.14e-06 | 0.000195% | 0.0 | 1 | 0.0      | 0.000356 | 0.000348 | 1.3e-05  | 0.000392% |
| L662      | False | koll11  | 2.14e-06 | 0.000195% | 0.0 | 1 | 0.0034   | 0.000712 | 0.000405 | 5.6e-06  | 0.000168% |
| OTU_4887  | True  | koll11  | 2.14e-06 | 0.000195% | 0.0 | 1 | 0.000407 | 3.7e-06  | 3.38e-05 | 4.14e-06 | 0.000124% |
| OTU_8786  | True  | ABY1    | 2.14e-06 | 0.000194% | 0.0 | 1 | 6.31e-05 | 0.000248 | 4.6e-06  | 1.22e-05 | 0.000367% |
| OTU_588   | True  | koll11  | 2.13e-06 | 0.000194% | 0.0 | 1 | 0.000186 | 8.07e-06 | 0.0      | 4.51e-06 | 0.000135% |
| L740      | False | PBS-25  | 2.13e-06 | 0.000194% | 0.0 | 1 | 0.00118  | 0.000103 | 0.000935 | 1.59e-05 | 0.000476% |
| L1643     | False | ZB2     | 2.13e-06 | 0.000194% | 0.0 | 1 | 0.001    | 0.000309 | 0.000815 | 2.04e-05 | 0.000613% |
| OTU_6779  | True  | ZB2     | 2.13e-06 | 0.000194% | 0.0 | 1 | 4.01e-06 | 0.0      | 0.00018  | 5.84e-06 | 0.000175% |
| L772      | False | PBS-25  | 2.13e-06 | 0.000194% | 0.0 | 1 | 0.00313  | 0.00035  | 0.00032  | 5.12e-06 | 0.000154% |
| L1067     | False | koll11  | 2.13e-06 | 0.000193% | 0.0 | 1 | 0.00064  | 3.78e-05 | 0.000154 | 6.62e-06 | 0.000199% |
| L1394     | False | ZB2     | 2.12e-06 | 0.000193% | 0.0 | 1 | 0.00388  | 0.00283  | 0.00171  | 2.93e-05 | 0.00088%  |
| OTU_8932  | True  | Mb-NB09 | 2.11e-06 | 0.000192% | 0.0 | 1 | 0.000444 | 0.000101 | 2.21e-05 | 6.51e-06 | 0.000195% |
| OTU_6089  | True  | SM2F11  | 2.11e-06 | 0.000192% | 0.0 | 1 | 0.000253 | 9.43e-05 | 0.0      | 1.03e-05 | 0.000311% |
| L684      | False | koll11  | 2.11e-06 | 0.000192% | 0.0 | 1 | 0.000839 | 2.9e-05  | 2.42e-05 | 4.79e-06 | 0.000144% |
| OTU_7592  | True  | ZB2     | 2.11e-06 | 0.000192% | 0.0 | 1 | 0.0      | 0.0      | 0.000241 | 5.33e-06 | 0.00016%  |
| OTU_9808  | True  | TM7-1   | 2.11e-06 | 0.000192% | 0.0 | 1 | 0.000243 | 0.0      | 0.0      | 4.28e-06 | 0.000128% |
| OTU_7092  | True  | OD1     | 2.09e-06 | 0.00019%  | 0.0 | 1 | 3.38e-05 | 0.000282 | 8.26e-06 | 8.67e-06 | 0.00026%  |
| OTU_4959  | True  | ZB2     | 2.09e-06 | 0.00019%  | 0.0 | 1 | 0.000259 | 1.11e-05 | 7.7e-06  | 7.34e-06 | 0.00022%  |
| OTU_7233  | True  | ABY1    | 2.08e-06 | 0.000189% | 0.0 | 1 | 0.00315  | 0.000925 | 0.000203 | 7.29e-06 | 0.000219% |
| OTU_8222  | True  | ABY1    | 2.07e-06 | 0.000188% | 0.0 | 1 | 8.92e-05 | 0.0      | 5.83e-08 | 3.75e-06 | 0.000113% |
| OTU_998   | True  | PBS-25  | 2.07e-06 | 0.000188% | 0.0 | 1 | 0.000369 | 0.0      | 0.0      | 4.29e-06 | 0.000129% |
| OTU_8928  | True  | TM7-1   | 2.06e-06 | 0.000188% | 0.0 | 1 | 0.000295 | 6.96e-05 | 1.81e-05 | 8.35e-06 | 0.000251% |
| L754      | False | PBS-25  | 2.06e-06 | 0.000187% | 0.0 | 1 | 0.00138  | 0.000117 | 0.00176  | 1.29e-05 | 0.000388% |
| L1670     | False | OD1     | 2.04e-06 | 0.000186% | 0.0 | 1 | 0.00232  | 0.00167  | 0.00056  | 1.73e-05 | 0.000518% |
| OTU_2571  | True  | PBS-25  | 2.03e-06 | 0.000185% | 0.0 | 1 | 0.000213 | 1.2e-05  | 4.1e-06  | 5.15e-06 | 0.000154% |
| OTU_5423  | True  | OD1     | 2.03e-06 | 0.000185% | 0.0 | 1 | 7.85e-05 | 0.0      | 0.0      | 4.1e-06  | 0.000123% |
| L462      | False | OP11-4  | 2.03e-06 | 0.000185% | 0.0 | 1 | 0.000639 | 9.12e-05 | 8.46e-05 | 5.15e-06 | 0.000155% |
| OTU_178   | True  | koll11  | 2.02e-06 | 0.000184% | 0.0 | 1 | 0.00102  | 0.000171 | 0.000229 | 8.56e-06 | 0.000257% |
| OTU_1094  | True  | PBS-25  | 2.02e-06 | 0.000184% | 0.0 | 1 | 0.00115  | 0.000117 | 5.54e-05 | 4.34e-06 | 0.00013%  |
| OTU_6542  | True  | OD1     | 2.02e-06 | 0.000184% | 0.0 | 1 | 0.000204 | 0.000695 | 3.52e-05 | 9.01e-06 | 0.00027%  |
| OTU_262   | True  | koll11  | 2.02e-06 | 0.000184% | 0.0 | 1 | 0.00746  | 0.00112  | 0.00168  | 4.88e-06 | 0.000147% |
| L1734     | False | Mb-NB09 | 2.01e-06 | 0.000183% | 0.0 | 1 | 0.000779 | 0.00104  | 4.89e-05 | 9.34e-06 | 0.00028%  |
| OTU_3998  | True  | koll11  | 2.01e-06 | 0.000183% | 0.0 | 1 | 0.000215 | 1.8e-05  | 3.95e-05 | 6.03e-06 | 0.000181% |
| OTU_10765 | True  | OP11-4  | 2.01e-06 | 0.000183% | 0.0 | 1 | 0.000593 | 3.84e-05 | 6.05e-05 | 2.82e-06 | 8.46e-05% |
| OTU_7343  | True  | ABY1    | 2e-06    | 0.000182% | 0.0 | 1 | 4.06e-07 | 0.00062  | 0.00089  | 1.02e-05 | 0.000307% |
| L657      | False | koll11  | 2e-06    | 0.000182% | 0.0 | 1 | 0.00523  | 0.000899 | 0.00195  | 7.32e-06 | 0.00022%  |
| OTU_307   | True  | koll11  | 1.99e-06 | 0.000181% | 0.0 | 1 | 0.0034   | 0.000292 | 0.000849 | 4.62e-06 | 0.000139% |
| L1070     | False | koll11  | 1.98e-06 | 0.00018%  | 0.0 | 1 | 0.000671 | 5.59e-06 | 2.98e-06 | 4.67e-06 | 0.00014%  |
| OTU_5951  | True  | OD1     | 1.97e-06 | 0.00018%  | 0.0 | 1 | 0.000143 | 1.43e-05 | 5.49e-06 | 5.4e-06  | 0.000162% |
| OTU_6598  | True  | ZB2     | 1.97e-06 | 0.000179% | 0.0 | 1 | 0.0      | 0.000186 | 0.000621 | 6.91e-06 | 0.000207% |
| L1134     | False | koll11  | 1.97e-06 | 0.000179% | 0.0 | 1 | 0.000988 | 0.000213 | 3.12e-05 | 6.34e-06 | 0.00019%  |
| L1100     | False | koll11  | 1.97e-06 | 0.000179% | 0.0 | 1 | 0.00147  | 0.000202 | 0.000565 | 9.17e-06 | 0.000275% |
| OTU_2626  | True  | SJA-4   | 1.96e-06 | 0.000179% | 0.0 | 1 | 2.99e-05 | 3.47e-07 | 0.000456 | 6.45e-06 | 0.000194% |
| OTU_6672  | True  | ABY1    | 1.96e-06 | 0.000179% | 0.0 | 1 | 6.06e-05 | 0.000521 | 0.000177 | 1.36e-05 | 0.000408% |

|           |       |         |          |           |     |   |          |          |          |          |           |
|-----------|-------|---------|----------|-----------|-----|---|----------|----------|----------|----------|-----------|
| L719      | False | PBS-25  | 1.96e-06 | 0.000178% | 0.0 | 1 | 0.0036   | 0.000868 | 0.000571 | 5.67e-06 | 0.00017%  |
| L1481     | False | ZB2     | 1.96e-06 | 0.000178% | 0.0 | 1 | 0.000406 | 0.0      | 0.0      | 3.57e-06 | 0.000107% |
| L351      | False | OD1     | 1.93e-06 | 0.000176% | 0.0 | 1 | 0.0005   | 9.64e-05 | 1.26e-05 | 4.44e-06 | 0.000133% |
| OTU_858   | True  | koll11  | 1.93e-06 | 0.000176% | 0.0 | 1 | 0.000338 | 2.09e-05 | 0.0      | 6.63e-06 | 0.000199% |
| OTU_429   | True  | PBS-25  | 1.92e-06 | 0.000175% | 0.0 | 1 | 0.000511 | 7.06e-06 | 0.000266 | 1.01e-05 | 0.000303% |
| OTU_891   | True  | PRR-12  | 1.92e-06 | 0.000174% | 0.0 | 1 | 0.001    | 0.000115 | 5.56e-05 | 5.24e-06 | 0.000157% |
| OTU_8867  | True  | Mb-NB09 | 1.91e-06 | 0.000174% | 0.0 | 1 | 0.000725 | 0.000254 | 0.000535 | 2.85e-05 | 0.000855% |
| OTU_8198  | True  | OD1     | 1.91e-06 | 0.000174% | 0.0 | 1 | 0.000134 | 3.14e-05 | 2.67e-06 | 7.07e-06 | 0.000212% |
| L1127     | False | koll11  | 1.9e-06  | 0.000173% | 0.0 | 1 | 0.000779 | 8.2e-05  | 2.84e-05 | 5.64e-06 | 0.000169% |
| OTU_811   | True  | koll11  | 1.9e-06  | 0.000173% | 0.0 | 1 | 0.000345 | 0.0      | 1.12e-05 | 2.79e-06 | 8.37e-05% |
| L915      | False | OP3     | 1.9e-06  | 0.000173% | 0.0 | 1 | 0.000992 | 6.85e-05 | 3.89e-06 | 2.54e-06 | 7.61e-05% |
| OTU_6922  | True  | OD1     | 1.86e-06 | 0.00017%  | 0.0 | 1 | 0.000233 | 5.13e-05 | 2.54e-05 | 7.84e-06 | 0.000235% |
| OTU_6567  | True  | ZB2     | 1.86e-06 | 0.000169% | 0.0 | 1 | 0.0015   | 0.000661 | 0.000385 | 1.6e-05  | 0.00048%  |
| L1492     | False | ZB2     | 1.86e-06 | 0.000169% | 0.0 | 1 | 0.000719 | 0.000129 | 2.05e-05 | 2.79e-06 | 8.38e-05% |
| L1201     | False | koll11  | 1.85e-06 | 0.000169% | 0.0 | 1 | 0.00113  | 0.000403 | 8.74e-05 | 6.64e-06 | 0.000199% |
| L609      | False | PRR-12  | 1.85e-06 | 0.000169% | 0.0 | 1 | 0.000683 | 0.0      | 2.96e-06 | 2.66e-06 | 7.99e-05% |
| OTU_6161  | True  | ABY1    | 1.85e-06 | 0.000168% | 0.0 | 1 | 0.000125 | 0.0      | 0.0      | 3.93e-06 | 0.000118% |
| OTU_5514  | True  | OD1     | 1.84e-06 | 0.000168% | 0.0 | 1 | 0.000117 | 1.47e-05 | 0.0      | 4.99e-06 | 0.00015%  |
| OTU_4389  | True  | koll11  | 1.84e-06 | 0.000168% | 0.0 | 1 | 0.00579  | 0.000271 | 0.000676 | 5.37e-06 | 0.000161% |
| OTU_9070  | True  | ABY1    | 1.84e-06 | 0.000168% | 0.0 | 1 | 4.37e-06 | 0.000222 | 0.00022  | 1.14e-05 | 0.000341% |
| L340      | False | OD1     | 1.84e-06 | 0.000168% | 0.0 | 1 | 0.000447 | 3.18e-05 | 4.53e-06 | 4.54e-06 | 0.000136% |
| OTU_549   | True  | koll11  | 1.84e-06 | 0.000167% | 0.0 | 1 | 0.000197 | 0.0      | 2.14e-05 | 4.44e-06 | 0.000133% |
| OTU_7207  | True  | ZB2     | 1.83e-06 | 0.000167% | 0.0 | 1 | 8.43e-05 | 1.73e-06 | 1.68e-06 | 3.96e-06 | 0.000119% |
| L1707     | False | Mb-NB09 | 1.83e-06 | 0.000167% | 0.0 | 1 | 0.000848 | 6.97e-05 | 3.59e-05 | 3.04e-06 | 9.13e-05% |
| L1118     | False | koll11  | 1.83e-06 | 0.000167% | 0.0 | 1 | 0.00347  | 0.000292 | 0.000849 | 4.1e-06  | 0.000123% |
| OTU_10850 | True  | OP11-4  | 1.83e-06 | 0.000166% | 0.0 | 1 | 9.67e-05 | 0.0      | 0.0      | 3.29e-06 | 9.87e-05% |
| L280      | False | ABY1    | 1.82e-06 | 0.000166% | 0.0 | 1 | 0.000339 | 2.02e-05 | 0.0      | 3.55e-06 | 0.000107% |
| OTU_904   | True  | koll11  | 1.82e-06 | 0.000166% | 0.0 | 1 | 0.000371 | 7.9e-06  | 0.0      | 3.01e-06 | 9.04e-05% |
| OTU_7938  | True  | ABY1    | 1.82e-06 | 0.000165% | 0.0 | 1 | 0.00024  | 1.77e-06 | 2.25e-05 | 3.87e-06 | 0.000116% |
| OTU_10809 | True  | OP11-4  | 1.82e-06 | 0.000165% | 0.0 | 1 | 0.000247 | 3.82e-05 | 0.0      | 3.82e-06 | 0.000115% |
| OTU_2412  | True  | SJA-4   | 1.82e-06 | 0.000165% | 0.0 | 1 | 0.000143 | 6.91e-06 | 0.0      | 4.32e-06 | 0.00013%  |
| OTU_8172  | True  | EW055   | 1.81e-06 | 0.000165% | 0.0 | 1 | 3.64e-06 | 0.0      | 0.000373 | 4.96e-06 | 0.000149% |
| OTU_6976  | True  | ZB2     | 1.81e-06 | 0.000165% | 0.0 | 1 | 0.000258 | 2.17e-05 | 1.91e-05 | 6.68e-06 | 0.0002%   |
| L1168     | False | GIF10   | 1.81e-06 | 0.000165% | 0.0 | 1 | 0.00107  | 0.000803 | 3.73e-05 | 7.43e-06 | 0.000223% |
| OTU_6953  | True  | ZB2     | 1.8e-06  | 0.000164% | 0.0 | 1 | 0.0      | 0.000331 | 0.0      | 2.72e-06 | 8.17e-05% |
| L515      | False | OP11-3  | 1.8e-06  | 0.000164% | 0.0 | 1 | 0.000692 | 0.000407 | 5.68e-05 | 1.25e-05 | 0.000376% |
| OTU_6680  | True  | OD1     | 1.8e-06  | 0.000164% | 0.0 | 1 | 0.00022  | 0.0      | 1.29e-05 | 2.84e-06 | 8.51e-05% |
| OTU_2194  | True  | koll11  | 1.8e-06  | 0.000164% | 0.0 | 1 | 0.00102  | 1.04e-05 | 0.000807 | 6.9e-06  | 0.000207% |
| L34       | False | ABY1    | 1.8e-06  | 0.000164% | 0.0 | 1 | 0.000354 | 1.52e-05 | 1.5e-05  | 3.13e-06 | 9.38e-05% |
| L1880     | False | OD1     | 1.8e-06  | 0.000164% | 0.0 | 1 | 0.000266 | 3.77e-05 | 1.32e-05 | 4.41e-06 | 0.000132% |
| OTU_8239  | True  | ABY1    | 1.79e-06 | 0.000163% | 0.0 | 1 | 0.000195 | 1.3e-06  | 0.0      | 3.5e-06  | 0.000105% |
| OTU_2529  | True  | GIF10   | 1.77e-06 | 0.000162% | 0.0 | 1 | 0.000434 | 2.01e-05 | 1.11e-05 | 3.99e-06 | 0.00012%  |
| L1200     | False | koll11  | 1.77e-06 | 0.000161% | 0.0 | 1 | 0.00149  | 0.000807 | 0.000103 | 7.64e-06 | 0.000229% |
| OTU_892   | True  | BD4-9   | 1.76e-06 | 0.000161% | 0.0 | 1 | 0.000251 | 0.0      | 0.0      | 4.29e-06 | 0.000129% |
| L1172     | False | GIF10   | 1.76e-06 | 0.00016%  | 0.0 | 1 | 0.000926 | 0.000293 | 3.73e-05 | 4.7e-06  | 0.000141% |
| OTU_7929  | True  | OD1     | 1.76e-06 | 0.00016%  | 0.0 | 1 | 8.22e-05 | 0.0      | 6.52e-07 | 3.67e-06 | 0.00011%  |
| OTU_672   | True  | koll11  | 1.76e-06 | 0.00016%  | 0.0 | 1 | 0.000709 | 0.000292 | 0.000149 | 1.39e-05 | 0.000417% |
| L1773     | False | OD1     | 1.76e-06 | 0.00016%  | 0.0 | 1 | 0.000573 | 0.000285 | 5.7e-05  | 8.05e-06 | 0.000242% |
| OTU_8267  | True  | ABY1    | 1.75e-06 | 0.000159% | 0.0 | 1 | 7.59e-06 | 0.00236  | 0.00209  | 5.46e-06 | 0.000164% |
| OTU_8201  | True  | ABY1    | 1.75e-06 | 0.000159% | 0.0 | 1 | 0.000125 | 2.63e-05 | 5.83e-08 | 4.46e-06 | 0.000134% |
| L944      | False | koll11  | 1.75e-06 | 0.000159% | 0.0 | 1 | 0.00421  | 0.00108  | 0.000843 | 3.11e-06 | 9.33e-05% |
| OTU_7219  | True  | ZB2     | 1.74e-06 | 0.000159% | 0.0 | 1 | 3.3e-05  | 0.000269 | 0.0      | 5.98e-06 | 0.00018%  |
| OTU_293   | True  | koll11  | 1.74e-06 | 0.000159% | 0.0 | 1 | 0.000396 | 0.000168 | 9.72e-05 | 1.91e-05 | 0.000573% |
| OTU_4010  | True  | koll11  | 1.73e-06 | 0.000158% | 0.0 | 1 | 0.000467 | 0.000332 | 5.77e-06 | 6.7e-06  | 0.000201% |
| L1354     | False | ZB2     | 1.73e-06 | 0.000157% | 0.0 | 1 | 0.00277  | 0.00119  | 0.000925 | 1.56e-05 | 0.000468% |
| OTU_6069  | True  | ABY1    | 1.72e-06 | 0.000156% | 0.0 | 1 | 0.000275 | 3.27e-05 | 2.8e-05  | 5.3e-06  | 0.000159% |
| OTU_821   | True  | koll11  | 1.72e-06 | 0.000156% | 0.0 | 1 | 0.000159 | 0.0      | 0.0      | 3.62e-06 | 0.000109% |
| L1341     | False | ZB2     | 1.72e-06 | 0.000156% | 0.0 | 1 | 0.00061  | 0.000194 | 1.49e-05 | 5.23e-06 | 0.000157% |
| OTU_817   | True  | BD4-9   | 1.72e-06 | 0.000156% | 0.0 | 1 | 0.000102 | 0.0      | 0.0      | 3.1e-06  | 9.32e-05% |
| OTU_559   | True  | koll11  | 1.7e-06  | 0.000155% | 0.0 | 1 | 0.00029  | 1.26e-05 | 2.71e-05 | 4.26e-06 | 0.000128% |
| OTU_345   | True  | koll11  | 1.69e-06 | 0.000154% | 0.0 | 1 | 3.12e-05 | 4.72e-05 | 0.000358 | 1.13e-05 | 0.000338% |
| OTU_8006  | True  | TM7-1   | 1.69e-06 | 0.000154% | 0.0 | 1 | 0.000309 | 3.49e-05 | 0.0      | 4.47e-06 | 0.000134% |
| L1623     | False | OD1     | 1.69e-06 | 0.000154% | 0.0 | 1 | 0.00026  | 0.00018  | 4.84e-05 | 1.58e-05 | 0.000474% |
| OTU_1539  | True  | PBS-25  | 1.68e-06 | 0.000153% | 0.0 | 1 | 0.00012  | 0.0      | 0.0      | 3.54e-06 | 0.000106% |
| OTU_2714  | True  | koll11  | 1.68e-06 | 0.000153% | 0.0 | 1 | 0.00102  | 0.000191 | 0.000647 | 1.23e-05 | 0.00037%  |

|           |       |         |          |           |     |   |          |          |          |          |           |
|-----------|-------|---------|----------|-----------|-----|---|----------|----------|----------|----------|-----------|
| OTU_6183  | True  | WCHB1   | 1.68e-06 | 0.000153% | 0.0 | 1 | 0.000643 | 0.000351 | 0.000768 | 5.69e-05 | 0.00171%  |
| L225      | False | ABY1    | 1.68e-06 | 0.000153% | 0.0 | 1 | 0.00105  | 0.000715 | 0.000458 | 4.13e-05 | 0.00124%  |
| OTU_6569  | True  | ZB2     | 1.67e-06 | 0.000152% | 0.0 | 1 | 0.000284 | 2.37e-05 | 1.29e-05 | 3.88e-06 | 0.000117% |
| OTU_8050  | True  | ABY1    | 1.67e-06 | 0.000152% | 0.0 | 1 | 0.000138 | 3.5e-05  | 1.42e-07 | 5.17e-06 | 0.000155% |
| L911      | False | koll11  | 1.66e-06 | 0.000151% | 0.0 | 1 | 0.000862 | 0.000289 | 0.000276 | 1.08e-05 | 0.000325% |
| L202      | False | ABY1    | 1.66e-06 | 0.000151% | 0.0 | 1 | 0.00247  | 0.000323 | 0.000606 | 4.5e-06  | 0.000135% |
| L1570     | False | ZB2     | 1.65e-06 | 0.00015%  | 0.0 | 1 | 0.00168  | 0.00033  | 0.00048  | 5.16e-06 | 0.000155% |
| L761      | False | PBS-25  | 1.64e-06 | 0.000149% | 0.0 | 1 | 0.00213  | 0.00025  | 0.000115 | 6.16e-06 | 0.000185% |
| OTU_8219  | True  | ABY1    | 1.64e-06 | 0.000149% | 0.0 | 1 | 0.000118 | 7.44e-06 | 1.02e-05 | 5.69e-06 | 0.000171% |
| OTU_2577  | True  | PBS-25  | 1.63e-06 | 0.000148% | 0.0 | 1 | 0.000715 | 7.86e-05 | 2.68e-05 | 4.59e-06 | 0.000138% |
| OTU_9137  | True  | ABY1    | 1.63e-06 | 0.000148% | 0.0 | 1 | 0.0      | 0.000409 | 0.0      | 5.13e-06 | 0.000154% |
| OTU_10770 | True  | OP11-4  | 1.62e-06 | 0.000148% | 0.0 | 1 | 0.000211 | 6.89e-05 | 2.4e-06  | 4.74e-06 | 0.000142% |
| OTU_509   | True  | PBS-25  | 1.62e-06 | 0.000147% | 0.0 | 1 | 0.000976 | 7.84e-05 | 4.2e-05  | 4.35e-06 | 0.00013%  |
| OTU_8227  | True  | OD1     | 1.62e-06 | 0.000147% | 0.0 | 1 | 0.000101 | 5.67e-06 | 1.2e-05  | 4.85e-06 | 0.000145% |
| L1170     | False | GIF10   | 1.62e-06 | 0.000147% | 0.0 | 1 | 0.000927 | 0.000803 | 3.73e-05 | 7.37e-06 | 0.000221% |
| L237      | False | ABY1    | 1.61e-06 | 0.000146% | 0.0 | 1 | 0.00129  | 0.000118 | 2.5e-05  | 2.98e-06 | 8.94e-05% |
| OTU_367   | True  | koll11  | 1.6e-06  | 0.000146% | 0.0 | 1 | 0.000442 | 3.78e-05 | 0.000149 | 6.19e-06 | 0.000186% |
| OTU_445   | True  | koll11  | 1.6e-06  | 0.000145% | 0.0 | 1 | 0.000373 | 7.14e-05 | 5.6e-05  | 5.89e-06 | 0.000177% |
| L1303     | False | TM7     | 1.59e-06 | 0.000145% | 0.0 | 1 | 0.000674 | 0.000218 | 0.000139 | 9.81e-06 | 0.000294% |
| OTU_4122  | True  | koll11  | 1.59e-06 | 0.000144% | 0.0 | 1 | 0.000706 | 0.000793 | 0.000128 | 1.92e-05 | 0.000577% |
| L665      | False | koll11  | 1.58e-06 | 0.000144% | 0.0 | 1 | 0.00261  | 0.000106 | 0.000278 | 2.67e-06 | 8.01e-05% |
| OTU_9341  | True  | TM7-1   | 1.57e-06 | 0.000143% | 0.0 | 1 | 0.000192 | 3.44e-06 | 2.9e-05  | 4.12e-06 | 0.000124% |
| OTU_2279  | True  | OP3     | 1.57e-06 | 0.000143% | 0.0 | 1 | 0.00107  | 3.14e-05 | 0.0      | 2.14e-06 | 6.44e-05% |
| OTU_6219  | True  | ZB2     | 1.57e-06 | 0.000143% | 0.0 | 1 | 0.000254 | 1.89e-05 | 0.0      | 4.2e-06  | 0.000126% |
| L1651     | False | ZB2     | 1.56e-06 | 0.000142% | 0.0 | 1 | 0.000152 | 6.7e-05  | 0.000643 | 9.11e-06 | 0.000274% |
| L739      | False | PBS-25  | 1.56e-06 | 0.000142% | 0.0 | 1 | 0.00215  | 0.000181 | 0.000977 | 7.48e-06 | 0.000224% |
| OTU_3356  | True  | SBRH58  | 1.56e-06 | 0.000142% | 0.0 | 1 | 0.0003   | 0.0      | 5.83e-08 | 2.55e-06 | 7.67e-05% |
| OTU_8749  | True  | OD1     | 1.56e-06 | 0.000142% | 0.0 | 1 | 0.00037  | 0.000264 | 3.57e-05 | 9.1e-06  | 0.000273% |
| OTU_3027  | True  | SJA-4   | 1.56e-06 | 0.000142% | 0.0 | 1 | 2.96e-05 | 0.0      | 0.000222 | 7.4e-06  | 0.000222% |
| OTU_468   | True  | koll11  | 1.54e-06 | 0.000141% | 0.0 | 1 | 4.74e-05 | 0.0002   | 9.23e-06 | 1.06e-05 | 0.000318% |
| OTU_140   | True  | OD1     | 1.54e-06 | 0.00014%  | 0.0 | 1 | 3.83e-05 | 0.000211 | 0.000291 | 3.06e-05 | 0.000918% |
| OTU_8990  | True  | ABY1    | 1.54e-06 | 0.00014%  | 0.0 | 1 | 0.0      | 0.000266 | 0.000132 | 8.35e-06 | 0.000251% |
| OTU_2202  | True  | PBS-25  | 1.54e-06 | 0.00014%  | 0.0 | 1 | 0.000189 | 0.0      | 0.0      | 3.66e-06 | 0.00011%  |
| OTU_278   | True  | koll11  | 1.54e-06 | 0.00014%  | 0.0 | 1 | 0.000722 | 0.000235 | 8.63e-05 | 7.02e-06 | 0.000211% |
| OTU_860   | True  | PBS-25  | 1.53e-06 | 0.000139% | 0.0 | 1 | 0.000186 | 0.0      | 0.0      | 4.37e-06 | 0.000131% |
| OTU_1432  | True  | koll11  | 1.53e-06 | 0.000139% | 0.0 | 1 | 0.000414 | 4.04e-06 | 0.0      | 1.75e-06 | 5.26e-05% |
| OTU_574   | True  | koll11  | 1.52e-06 | 0.000139% | 0.0 | 1 | 0.000217 | 1.35e-06 | 3.02e-05 | 4.12e-06 | 0.000124% |
| L1875     | False | OD1     | 1.5e-06  | 0.000136% | 0.0 | 1 | 0.000817 | 0.000445 | 3.98e-05 | 5.47e-06 | 0.000164% |
| L445      | False | OP11-4  | 1.5e-06  | 0.000136% | 0.0 | 1 | 0.00119  | 0.000126 | 0.000843 | 8.38e-06 | 0.000252% |
| OTU_9374  | True  | TM7-1   | 1.5e-06  | 0.000136% | 0.0 | 1 | 0.000249 | 0.0      | 0.0      | 2.84e-06 | 8.54e-05% |
| L696      | False | koll11  | 1.48e-06 | 0.000135% | 0.0 | 1 | 0.00165  | 0.000863 | 4.44e-05 | 3.5e-06  | 0.000105% |
| L671      | False | koll11  | 1.48e-06 | 0.000134% | 0.0 | 1 | 0.000817 | 7.27e-05 | 2.55e-05 | 3.12e-06 | 9.37e-05% |
| OTU_6189  | True  | ZB2     | 1.48e-06 | 0.000134% | 0.0 | 1 | 0.0      | 0.000321 | 6.86e-05 | 3.17e-06 | 9.5e-05%  |
| OTU_2009  | True  | PRR-12  | 1.47e-06 | 0.000134% | 0.0 | 1 | 0.00118  | 0.000115 | 0.000168 | 3.05e-06 | 9.16e-05% |
| L245      | False | ABY1    | 1.47e-06 | 0.000134% | 0.0 | 1 | 8.94e-05 | 9.81e-05 | 0.000806 | 7.83e-06 | 0.000235% |
| OTU_1389  | True  | GIF10   | 1.47e-06 | 0.000133% | 0.0 | 1 | 0.000891 | 0.00109  | 0.00196  | 7.44e-05 | 0.00223%  |
| L1114     | False | koll11  | 1.46e-06 | 0.000133% | 0.0 | 1 | 0.00342  | 0.000356 | 0.0015   | 5.39e-06 | 0.000162% |
| OTU_8936  | True  | Mb-NB09 | 1.46e-06 | 0.000133% | 0.0 | 1 | 0.0      | 0.000157 | 9.73e-06 | 4.34e-06 | 0.00013%  |
| OTU_554   | True  | PRR-12  | 1.46e-06 | 0.000133% | 0.0 | 1 | 0.00038  | 0.0      | 2.96e-06 | 2.99e-06 | 8.98e-05% |
| L471      | False | OP11-4  | 1.45e-06 | 0.000132% | 0.0 | 1 | 0.000174 | 2.4e-06  | 4.83e-06 | 2.63e-06 | 7.89e-05% |
| L1877     | False | OD1     | 1.44e-06 | 0.000131% | 0.0 | 1 | 0.000648 | 0.000329 | 3.18e-05 | 5.27e-06 | 0.000158% |
| L214      | False | ABY1    | 1.44e-06 | 0.000131% | 0.0 | 1 | 0.00022  | 0.000249 | 0.0      | 8.03e-06 | 0.000241% |
| L178      | False | SM2F11  | 1.44e-06 | 0.000131% | 0.0 | 1 | 0.000499 | 0.000227 | 0.000185 | 1.4e-05  | 0.000421% |
| L1202     | False | koll11  | 1.43e-06 | 0.00013%  | 0.0 | 1 | 0.000961 | 0.000394 | 7.3e-05  | 6.2e-06  | 0.000186% |
| L1508     | False | OD1     | 1.41e-06 | 0.000128% | 0.0 | 1 | 0.0134   | 0.00343  | 0.00626  | 3.6e-06  | 0.000108% |
| OTU_5075  | True  | GIF10   | 1.4e-06  | 0.000128% | 0.0 | 1 | 0.000104 | 0.0      | 0.0      | 2.27e-06 | 6.8e-05%  |
| OTU_8213  | True  | ABY1    | 1.4e-06  | 0.000127% | 0.0 | 1 | 0.000122 | 7.4e-07  | 0.0      | 2.15e-06 | 6.44e-05% |
| OTU_981   | True  | PRR-12  | 1.4e-06  | 0.000127% | 0.0 | 1 | 0.000651 | 7.56e-07 | 0.0      | 2.87e-06 | 8.62e-05% |
| OTU_5837  | True  | OD1     | 1.39e-06 | 0.000127% | 0.0 | 1 | 0.000154 | 5.95e-06 | 3.64e-05 | 5.49e-06 | 0.000165% |
| OTU_3769  | True  | koll11  | 1.39e-06 | 0.000127% | 0.0 | 1 | 0.00119  | 0.000531 | 3.86e-05 | 4.1e-06  | 0.000123% |
| OTU_7211  | True  | ABY1    | 1.38e-06 | 0.000126% | 0.0 | 1 | 7.01e-05 | 0.0      | 0.0      | 3.28e-06 | 9.85e-05% |
| L1398     | False | ZB2     | 1.38e-06 | 0.000126% | 0.0 | 1 | 0.00152  | 0.00208  | 0.000834 | 3.09e-05 | 0.000927% |
| OTU_8021  | True  | ABY1    | 1.38e-06 | 0.000125% | 0.0 | 1 | 0.000546 | 0.000116 | 2.51e-06 | 4.3e-06  | 0.000129% |
| OTU_6995  | True  | ABY1    | 1.38e-06 | 0.000125% | 0.0 | 1 | 0.000861 | 0.000256 | 7.46e-05 | 3.45e-06 | 0.000103% |
| OTU_7959  | True  | ABY1    | 1.37e-06 | 0.000125% | 0.0 | 1 | 0.000492 | 0.00024  | 0.0      | 6.01e-06 | 0.00018%  |



|           |       |         |          |           |     |   |          |          |          |          |           |
|-----------|-------|---------|----------|-----------|-----|---|----------|----------|----------|----------|-----------|
| L1266     | False | TM7-1   | 1.37e-06 | 0.000125% | 0.0 | 1 | 0.00117  | 0.000594 | 5.57e-05 | 5.07e-06 | 0.000152% |
| OTU_454   | True  | koll11  | 1.37e-06 | 0.000125% | 0.0 | 1 | 0.000415 | 3.42e-05 | 2.11e-05 | 2.57e-06 | 7.71e-05% |
| OTU_1232  | True  | PBS-25  | 1.36e-06 | 0.000124% | 0.0 | 1 | 0.00185  | 6.75e-05 | 7.1e-05  | 3.16e-06 | 9.48e-05% |
| OTU_498   | True  | wb1_H11 | 1.36e-06 | 0.000124% | 0.0 | 1 | 0.000303 | 0.0      | 0.0      | 2.51e-06 | 7.54e-05% |
| OTU_384   | True  | PBS-25  | 1.36e-06 | 0.000123% | 0.0 | 1 | 0.00015  | 0.000262 | 5.83e-08 | 6.68e-06 | 0.0002%   |
| OTU_440   | True  | PBS-25  | 1.35e-06 | 0.000123% | 0.0 | 1 | 0.000687 | 7.95e-05 | 2.89e-05 | 2.62e-06 | 7.88e-05% |
| OTU_9815  | True  | ABY1    | 1.35e-06 | 0.000123% | 0.0 | 1 | 0.000101 | 0.0      | 0.0      | 2.68e-06 | 8.05e-05% |
| OTU_6708  | True  | ZB2     | 1.35e-06 | 0.000122% | 0.0 | 1 | 9.12e-05 | 0.0      | 0.0      | 2.43e-06 | 7.3e-05%  |
| OTU_8252  | True  | ABY1    | 1.33e-06 | 0.000121% | 0.0 | 1 | 0.00109  | 3.87e-05 | 4.66e-06 | 1.91e-06 | 5.74e-05% |
| OTU_7958  | True  | ABY1    | 1.32e-06 | 0.00012%  | 0.0 | 1 | 9.96e-05 | 7.49e-06 | 0.0      | 3.39e-06 | 0.000102% |
| L1469     | False | ZB2     | 1.31e-06 | 0.00012%  | 0.0 | 1 | 0.000406 | 0.000224 | 1.24e-05 | 5.69e-06 | 0.000171% |
| L688      | False | koll11  | 1.3e-06  | 0.000119% | 0.0 | 1 | 0.00417  | 0.00138  | 0.00116  | 4.12e-06 | 0.000124% |
| OTU_7943  | True  | ABY1    | 1.3e-06  | 0.000118% | 0.0 | 1 | 8.59e-05 | 0.0      | 0.0      | 2.99e-06 | 8.97e-05% |
| OTU_501   | True  | koll11  | 1.29e-06 | 0.000118% | 0.0 | 1 | 0.000209 | 0.0      | 0.0      | 1.86e-06 | 5.58e-05% |
| L451      | False | OP11-4  | 1.29e-06 | 0.000118% | 0.0 | 1 | 0.001    | 0.000103 | 0.000609 | 8.7e-06  | 0.000261% |
| OTU_7029  | True  | OD1     | 1.29e-06 | 0.000117% | 0.0 | 1 | 0.000188 | 0.000196 | 5.77e-05 | 1.82e-05 | 0.000547% |
| OTU_659   | True  | koll11  | 1.28e-06 | 0.000117% | 0.0 | 1 | 0.000124 | 0.0      | 0.0      | 2.33e-06 | 7e-05%    |
| OTU_3274  | True  | PBS-25  | 1.28e-06 | 0.000117% | 0.0 | 1 | 0.000276 | 1.85e-05 | 0.0      | 2.72e-06 | 8.16e-05% |
| L48       | False | OD1     | 1.28e-06 | 0.000116% | 0.0 | 1 | 0.000423 | 0.000318 | 4.6e-06  | 6.51e-06 | 0.000195% |
| L1899     | False | OD1     | 1.27e-06 | 0.000116% | 0.0 | 1 | 0.000752 | 0.000337 | 8.89e-05 | 5.89e-06 | 0.000177% |
| OTU_562   | True  | koll11  | 1.27e-06 | 0.000116% | 0.0 | 1 | 0.000338 | 2.19e-05 | 4.75e-05 | 3.23e-06 | 9.68e-05% |
| OTU_6515  | True  | SM2F11  | 1.26e-06 | 0.000114% | 0.0 | 1 | 0.000229 | 0.0      | 2.53e-05 | 3.21e-06 | 9.65e-05% |
| OTU_1042  | True  | OP3     | 1.25e-06 | 0.000114% | 0.0 | 1 | 0.00027  | 3.52e-05 | 4.48e-06 | 2.28e-06 | 6.83e-05% |
| OTU_2685  | True  | PBS-25  | 1.25e-06 | 0.000114% | 0.0 | 1 | 0.0      | 0.0      | 0.000288 | 3.29e-06 | 9.87e-05% |
| OTU_5377  | True  | ZB2     | 1.25e-06 | 0.000114% | 0.0 | 1 | 0.000187 | 1.69e-05 | 4.58e-05 | 6.2e-06  | 0.000186% |
| OTU_10819 | True  | OP11-4  | 1.25e-06 | 0.000114% | 0.0 | 1 | 0.0      | 5.74e-05 | 0.0      | 4.58e-06 | 0.000137% |
| L517      | False | OP11-3  | 1.25e-06 | 0.000114% | 0.0 | 1 | 0.00028  | 0.0004   | 5.63e-05 | 1.39e-05 | 0.000418% |
| OTU_6305  | True  | OD1     | 1.24e-06 | 0.000113% | 0.0 | 1 | 5.3e-05  | 0.0      | 0.0      | 2.94e-06 | 8.82e-05% |
| L546      | False | SJA-4   | 1.24e-06 | 0.000113% | 0.0 | 1 | 0.000377 | 0.000181 | 0.000791 | 1.81e-05 | 0.000543% |
| OTU_6184  | True  | SM2F11  | 1.24e-06 | 0.000112% | 0.0 | 1 | 0.0      | 0.000167 | 1.18e-05 | 3.56e-06 | 0.000107% |
| OTU_8757  | True  | OD1     | 1.23e-06 | 0.000112% | 0.0 | 1 | 0.000109 | 0.0      | 6.45e-05 | 5.34e-06 | 0.00016%  |
| L382      | False | OD1     | 1.22e-06 | 0.000111% | 0.0 | 1 | 0.000769 | 3.53e-05 | 7.74e-05 | 2.87e-06 | 8.6e-05%  |
| OTU_5491  | True  | OD1     | 1.22e-06 | 0.000111% | 0.0 | 1 | 0.000379 | 0.0      | 0.0      | 2.13e-06 | 6.39e-05% |
| L1487     | False | ZB2     | 1.21e-06 | 0.000111% | 0.0 | 1 | 0.00188  | 0.000763 | 0.000476 | 8.14e-06 | 0.000244% |
| OTU_6930  | True  | ZB2     | 1.21e-06 | 0.00011%  | 0.0 | 1 | 0.000145 | 0.0      | 0.0      | 2.54e-06 | 7.63e-05% |
| OTU_295   | True  | koll11  | 1.21e-06 | 0.00011%  | 0.0 | 1 | 1.99e-05 | 0.000172 | 0.0      | 5.09e-06 | 0.000153% |
| OTU_985   | True  | PBS-25  | 1.2e-06  | 0.000109% | 0.0 | 1 | 0.000444 | 0.000133 | 5.83e-08 | 3.55e-06 | 0.000106% |
| OTU_550   | True  | koll11  | 1.19e-06 | 0.000108% | 0.0 | 1 | 0.000198 | 0.0      | 4.47e-06 | 3.01e-06 | 9.02e-05% |
| OTU_1244  | True  | koll11  | 1.19e-06 | 0.000108% | 0.0 | 1 | 0.000536 | 0.000691 | 0.000171 | 1.83e-05 | 0.00055%  |
| OTU_10934 | True  | GIF10   | 1.18e-06 | 0.000108% | 0.0 | 1 | 0.000138 | 0.0      | 0.0      | 2.17e-06 | 6.51e-05% |
| OTU_5392  | True  | ZB2     | 1.18e-06 | 0.000107% | 0.0 | 1 | 5.19e-05 | 0.0      | 5.42e-06 | 3.57e-06 | 0.000107% |
| OTU_7215  | True  | ABY1    | 1.17e-06 | 0.000106% | 0.0 | 1 | 0.000506 | 0.000115 | 1.93e-05 | 2.86e-06 | 8.59e-05% |
| OTU_1825  | True  | koll11  | 1.17e-06 | 0.000106% | 0.0 | 1 | 0.000647 | 0.000268 | 0.000276 | 1.37e-05 | 0.000412% |
| OTU_8373  | True  | ABY1    | 1.16e-06 | 0.000106% | 0.0 | 1 | 0.000129 | 1.77e-07 | 1.37e-05 | 2.58e-06 | 7.73e-05% |
| OTU_1140  | True  | PBS-25  | 1.16e-06 | 0.000106% | 0.0 | 1 | 0.000383 | 4.73e-05 | 0.000234 | 1.01e-05 | 0.000303% |
| L571      | False | SJA-4   | 1.16e-06 | 0.000105% | 0.0 | 1 | 0.000143 | 0.000193 | 0.0      | 7.02e-06 | 0.000211% |
| OTU_4802  | True  | GIF10   | 1.15e-06 | 0.000104% | 0.0 | 1 | 0.000195 | 3.05e-05 | 0.0      | 3.61e-06 | 0.000108% |
| L1639     | False | ZB2     | 1.14e-06 | 0.000104% | 0.0 | 1 | 0.00101  | 0.00211  | 0.00281  | 3.53e-05 | 0.00106%  |
| OTU_6222  | True  | ZB2     | 1.14e-06 | 0.000104% | 0.0 | 1 | 0.000208 | 6.11e-05 | 4.3e-05  | 6.39e-06 | 0.000192% |
| L1359     | False | ZB2     | 1.13e-06 | 0.000103% | 0.0 | 1 | 0.000251 | 0.0      | 0.000287 | 6.13e-06 | 0.000184% |
| OTU_6933  | True  | ZB2     | 1.13e-06 | 0.000103% | 0.0 | 1 | 0.000233 | 4.77e-05 | 0.0      | 3.46e-06 | 0.000104% |
| OTU_4247  | True  | koll11  | 1.13e-06 | 0.000103% | 0.0 | 1 | 0.000422 | 8.14e-06 | 2.42e-05 | 2.52e-06 | 7.55e-05% |
| OTU_1218  | True  | koll11  | 1.12e-06 | 0.000102% | 0.0 | 1 | 0.00023  | 8.73e-05 | 2.06e-05 | 4.92e-06 | 0.000148% |
| OTU_8126  | True  | ABY1    | 1.12e-06 | 0.000102% | 0.0 | 1 | 0.000772 | 8.39e-07 | 2.36e-05 | 2.95e-06 | 8.84e-05% |
| L1646     | False | ZB2     | 1.12e-06 | 0.000102% | 0.0 | 1 | 0.000557 | 0.000172 | 0.000172 | 7.57e-06 | 0.000227% |
| OTU_8208  | True  | ABY1    | 1.12e-06 | 0.000102% | 0.0 | 1 | 6.49e-05 | 5.77e-05 | 6.78e-06 | 1.15e-05 | 0.000346% |
| OTU_7930  | True  | ZB2     | 1.12e-06 | 0.000102% | 0.0 | 1 | 0.000115 | 0.0      | 0.0      | 2.21e-06 | 6.64e-05% |
| OTU_8247  | True  | ZB2     | 1.11e-06 | 0.000101% | 0.0 | 1 | 0.000354 | 0.000315 | 2.34e-06 | 7e-06    | 0.00021%  |
| OTU_5887  | True  | OD1     | 1.1e-06  | 0.0001%   | 0.0 | 1 | 0.000266 | 1.97e-05 | 3.14e-06 | 2.01e-06 | 6.03e-05% |
| L693      | False | koll11  | 1.1e-06  | 0.0001%   | 0.0 | 1 | 0.00139  | 0.000278 | 0.000471 | 4.43e-06 | 0.000133% |
| L1645     | False | ZB2     | 1.09e-06 | 9.97e-05% | 0.0 | 1 | 0.000709 | 0.000239 | 0.000815 | 1.22e-05 | 0.000366% |
| OTU_4833  | True  | OD1     | 1.09e-06 | 9.91e-05% | 0.0 | 1 | 6.43e-05 | 0.0      | 5.83e-08 | 2.51e-06 | 7.54e-05% |
| L629      | False | PBS-25  | 1.08e-06 | 9.86e-05% | 0.0 | 1 | 0.00269  | 8.75e-05 | 7.1e-05  | 1.85e-06 | 5.55e-05% |
| L429      | False | OP11    | 1.08e-06 | 9.84e-05% | 0.0 | 1 | 0.00084  | 0.000351 | 0.000768 | 2.39e-05 | 0.000717% |

|           |       |        |          |           |     |   |          |          |          |          |           |
|-----------|-------|--------|----------|-----------|-----|---|----------|----------|----------|----------|-----------|
| OTU_8762  | True  | OD1    | 1.07e-06 | 9.77e-05% | 0.0 | 1 | 0.000203 | 2.06e-05 | 2.13e-05 | 2.91e-06 | 8.74e-05% |
| OTU_3804  | True  | PBS-25 | 1.07e-06 | 9.73e-05% | 0.0 | 1 | 0.000108 | 0.0      | 0.0      | 2.24e-06 | 6.72e-05% |
| OTU_643   | True  | koll11 | 1.07e-06 | 9.72e-05% | 0.0 | 1 | 0.00118  | 0.000226 | 3.02e-05 | 3.22e-06 | 9.66e-05% |
| OTU_5794  | True  | OD1    | 1.07e-06 | 9.7e-05%  | 0.0 | 1 | 0.000261 | 1.94e-05 | 2.62e-05 | 1.89e-06 | 5.67e-05% |
| OTU_6117  | True  | OD1    | 1.06e-06 | 9.64e-05% | 0.0 | 1 | 0.000307 | 4.44e-05 | 0.000305 | 9.76e-06 | 0.000293% |
| OTU_1133  | True  | GIF10  | 1.06e-06 | 9.63e-05% | 0.0 | 1 | 0.000492 | 0.000272 | 2.62e-05 | 4.84e-06 | 0.000145% |
| OTU_8009  | True  | ABY1   | 1.06e-06 | 9.62e-05% | 0.0 | 1 | 0.000673 | 0.0      | 0.0      | 2.2e-06  | 6.6e-05%  |
| L302      | False | ABY1   | 1.05e-06 | 9.6e-05%  | 0.0 | 1 | 0.000299 | 1.08e-05 | 5.5e-06  | 1.97e-06 | 5.91e-05% |
| OTU_6758  | True  | ZB2    | 1.05e-06 | 9.57e-05% | 0.0 | 1 | 0.000183 | 7.15e-07 | 0.0      | 2.76e-06 | 8.28e-05% |
| OTU_7059  | True  | ZB2    | 1.05e-06 | 9.54e-05% | 0.0 | 1 | 6.19e-05 | 0.000532 | 5.45e-06 | 3.3e-06  | 9.91e-05% |
| OTU_5878  | True  | OD1    | 1.05e-06 | 9.52e-05% | 0.0 | 1 | 0.000151 | 5.03e-05 | 1.32e-05 | 4.78e-06 | 0.000143% |
| OTU_8903  | True  | ABY1   | 1.05e-06 | 9.52e-05% | 0.0 | 1 | 0.000412 | 0.0      | 8.1e-05  | 3.23e-06 | 9.7e-05%  |
| OTU_2868  | True  | SJA-4  | 1.04e-06 | 9.51e-05% | 0.0 | 1 | 0.0      | 0.000215 | 1.05e-06 | 3.33e-06 | 9.99e-05% |
| OTU_6579  | True  | ZB2    | 1.04e-06 | 9.47e-05% | 0.0 | 1 | 1.58e-06 | 0.0001   | 0.000417 | 5.16e-06 | 0.000155% |
| L1578     | False | ZB2    | 1.04e-06 | 9.42e-05% | 0.0 | 1 | 0.000445 | 2.46e-05 | 5.46e-05 | 2.86e-06 | 8.58e-05% |
| OTU_580   | True  | PBS-25 | 1.03e-06 | 9.38e-05% | 0.0 | 1 | 0.00125  | 0.000219 | 0.000127 | 2.65e-06 | 7.94e-05% |
| L1154     | False | koll11 | 1.03e-06 | 9.35e-05% | 0.0 | 1 | 0.00615  | 0.00134  | 0.00466  | 7.49e-06 | 0.000225% |
| OTU_4482  | True  | koll11 | 1.02e-06 | 9.3e-05%  | 0.0 | 1 | 0.00015  | 0.0      | 0.0      | 2.41e-06 | 7.23e-05% |
| L615      | False | BD4-9  | 1.02e-06 | 9.26e-05% | 0.0 | 1 | 0.000353 | 0.000132 | 0.0      | 4.3e-06  | 0.000129% |
| OTU_893   | True  | PBS-25 | 1.01e-06 | 9.2e-05%  | 0.0 | 1 | 0.000499 | 0.000218 | 5.83e-08 | 4.14e-06 | 0.000124% |
| L728      | False | PBS-25 | 1.01e-06 | 9.2e-05%  | 0.0 | 1 | 0.00722  | 0.00103  | 0.00263  | 3.73e-06 | 0.000112% |
| OTU_10835 | True  | OP11-4 | 1.01e-06 | 9.18e-05% | 0.0 | 1 | 6.03e-05 | 2.22e-06 | 4.83e-06 | 3.83e-06 | 0.000115% |
| L562      | False | SJA-4  | 1.01e-06 | 9.16e-05% | 0.0 | 1 | 0.000248 | 0.000158 | 2.35e-07 | 3.67e-06 | 0.00011%  |
| OTU_6561  | True  | OD1    | 1e-06    | 9.13e-05% | 0.0 | 1 | 9.09e-05 | 1.77e-07 | 0.0      | 2.01e-06 | 6.03e-05% |
| OTU_500   | True  | PBS-25 | 1e-06    | 9.11e-05% | 0.0 | 1 | 0.000141 | 0.0      | 4.22e-06 | 2.18e-06 | 6.55e-05% |
| OTU_6989  | True  | ABY1   | 9.87e-07 | 8.99e-05% | 0.0 | 1 | 8.59e-05 | 4.87e-05 | 1.2e-05  | 7.62e-06 | 0.000229% |
| OTU_966   | True  | PRR-12 | 9.69e-07 | 8.82e-05% | 0.0 | 1 | 0.0      | 3.54e-05 | 9.86e-05 | 6.09e-06 | 0.000183% |
| L1577     | False | ZB2    | 9.68e-07 | 8.81e-05% | 0.0 | 1 | 0.000778 | 0.000332 | 7.69e-05 | 3.78e-06 | 0.000114% |
| OTU_1117  | True  | BD4-9  | 9.65e-07 | 8.79e-05% | 0.0 | 1 | 0.0      | 0.000132 | 0.0      | 3.12e-06 | 9.38e-05% |
| OTU_10774 | True  | OP11-4 | 9.6e-07  | 8.74e-05% | 0.0 | 1 | 0.00013  | 0.0      | 0.0      | 2.01e-06 | 6.03e-05% |
| L1159     | False | koll11 | 9.56e-07 | 8.7e-05%  | 0.0 | 1 | 0.00268  | 1.25e-05 | 1.93e-05 | 1.96e-06 | 5.88e-05% |
| OTU_266   | True  | koll11 | 9.5e-07  | 8.65e-05% | 0.0 | 1 | 0.000293 | 5.42e-06 | 1.77e-05 | 2.04e-06 | 6.12e-05% |
| OTU_7041  | True  | ZB2    | 9.46e-07 | 8.61e-05% | 0.0 | 1 | 1.29e-06 | 0.000387 | 0.000302 | 4.05e-06 | 0.000121% |
| OTU_6312  | True  | ZB2    | 9.45e-07 | 8.6e-05%  | 0.0 | 1 | 0.00103  | 0.000135 | 7.25e-05 | 2.34e-06 | 7.02e-05% |
| OTU_4223  | True  | koll11 | 9.44e-07 | 8.59e-05% | 0.0 | 1 | 0.0      | 0.0      | 0.000102 | 3.1e-06  | 9.31e-05% |
| L691      | False | koll11 | 9.39e-07 | 8.55e-05% | 0.0 | 1 | 0.00241  | 0.000469 | 0.00112  | 3.44e-06 | 0.000103% |
| L1757     | False | OD1    | 9.36e-07 | 8.52e-05% | 0.0 | 1 | 0.000465 | 0.00055  | 0.000214 | 3.25e-05 | 0.000974% |
| OTU_8150  | True  | OP11-4 | 9.36e-07 | 8.52e-05% | 0.0 | 1 | 9.44e-05 | 0.0      | 7.21e-06 | 2.61e-06 | 7.84e-05% |
| L817      | False | PBS-25 | 9.33e-07 | 8.5e-05%  | 0.0 | 1 | 0.00112  | 0.00028  | 5.83e-08 | 2.86e-06 | 8.59e-05% |
| L316      | False | ABY1   | 9.33e-07 | 8.49e-05% | 0.0 | 1 | 0.000161 | 0.000632 | 0.000213 | 9.71e-06 | 0.000292% |
| OTU_8644  | True  | ABY1   | 9.3e-07  | 8.46e-05% | 0.0 | 1 | 0.000432 | 0.000248 | 1.78e-05 | 3.52e-06 | 0.000106% |
| OTU_5265  | True  | OD1    | 9.26e-07 | 8.43e-05% | 0.0 | 1 | 0.000552 | 0.00014  | 1.58e-05 | 2.45e-06 | 7.35e-05% |
| OTU_738   | True  | koll11 | 9.26e-07 | 8.43e-05% | 0.0 | 1 | 0.000147 | 4.73e-05 | 2.83e-06 | 4.46e-06 | 0.000134% |
| OTU_7113  | True  | ABY1   | 9.2e-07  | 8.37e-05% | 0.0 | 1 | 3.23e-05 | 0.000126 | 0.0      | 3.53e-06 | 0.000106% |
| OTU_8032  | True  | ABY1   | 9.2e-07  | 8.37e-05% | 0.0 | 1 | 0.000199 | 1.14e-05 | 0.0      | 2.47e-06 | 7.4e-05%  |
| L882      | False | koll11 | 9.12e-07 | 8.3e-05%  | 0.0 | 1 | 0.00711  | 0.00268  | 0.00229  | 3.34e-06 | 0.0001%   |
| L453      | False | OP11-4 | 9.11e-07 | 8.29e-05% | 0.0 | 1 | 0.00097  | 3.92e-05 | 0.000597 | 4.92e-06 | 0.000148% |
| OTU_5804  | True  | OD1    | 9.08e-07 | 8.26e-05% | 0.0 | 1 | 0.000385 | 1.28e-05 | 2.26e-06 | 2.25e-06 | 6.74e-05% |
| OTU_388   | True  | koll11 | 9.04e-07 | 8.23e-05% | 0.0 | 1 | 0.000269 | 4.3e-05  | 0.0      | 1.71e-06 | 5.13e-05% |
| OTU_306   | True  | koll11 | 9.02e-07 | 8.21e-05% | 0.0 | 1 | 0.000926 | 0.000762 | 0.000222 | 8.58e-06 | 0.000257% |
| L446      | False | OP11-4 | 9.02e-07 | 8.21e-05% | 0.0 | 1 | 0.000186 | 2.34e-05 | 0.000234 | 5.27e-06 | 0.000158% |
| OTU_4170  | True  | koll11 | 9e-07    | 8.19e-05% | 0.0 | 1 | 2.61e-05 | 0.000123 | 0.0      | 4.51e-06 | 0.000135% |
| OTU_5249  | True  | OD1    | 8.99e-07 | 8.18e-05% | 0.0 | 1 | 0.000361 | 7.91e-05 | 1.16e-05 | 2.57e-06 | 7.71e-05% |
| L1395     | False | ZB2    | 8.96e-07 | 8.15e-05% | 0.0 | 1 | 0.00236  | 0.000755 | 0.00088  | 7.97e-06 | 0.000239% |
| OTU_433   | True  | PBS-25 | 8.92e-07 | 8.12e-05% | 0.0 | 1 | 0.000355 | 8.15e-05 | 7.91e-05 | 3.6e-06  | 0.000108% |
| L683      | False | koll11 | 8.91e-07 | 8.11e-05% | 0.0 | 1 | 0.000839 | 2.9e-05  | 0.000126 | 2.86e-06 | 8.58e-05% |
| OTU_300   | True  | koll11 | 8.88e-07 | 8.09e-05% | 0.0 | 1 | 0.0      | 0.000107 | 0.0      | 2.57e-06 | 7.71e-05% |
| OTU_6070  | True  | ZB2    | 8.88e-07 | 8.08e-05% | 0.0 | 1 | 1.09e-05 | 0.000568 | 0.0005   | 6.14e-06 | 0.000184% |
| L1475     | False | ZB2    | 8.84e-07 | 8.04e-05% | 0.0 | 1 | 0.000675 | 0.000493 | 0.000323 | 2.46e-05 | 0.000739% |
| OTU_4019  | True  | koll11 | 8.8e-07  | 8.01e-05% | 0.0 | 1 | 0.0      | 0.0      | 0.000103 | 2.32e-06 | 6.96e-05% |
| OTU_6988  | True  | ZB2    | 8.79e-07 | 8e-05%    | 0.0 | 1 | 0.0015   | 0.000448 | 0.000737 | 8.53e-06 | 0.000256% |
| OTU_1795  | True  | koll11 | 8.75e-07 | 7.96e-05% | 0.0 | 1 | 0.000253 | 3.13e-05 | 1.69e-05 | 2.7e-06  | 8.09e-05% |
| L1868     | False | OD1    | 8.73e-07 | 7.95e-05% | 0.0 | 1 | 0.00116  | 0.000116 | 0.000142 | 1.68e-06 | 5.03e-05% |
| OTU_6180  | True  | OD1    | 8.73e-07 | 7.95e-05% | 0.0 | 1 | 0.000314 | 0.000319 | 2.8e-06  | 3.88e-06 | 0.000116% |

|           |       |         |          |           |     |   |          |          |          |          |           |
|-----------|-------|---------|----------|-----------|-----|---|----------|----------|----------|----------|-----------|
| OTU_926   | True  | koll11  | 8.72e-07 | 7.94e-05% | 0.0 | 1 | 0.000882 | 0.000758 | 8.33e-05 | 4.51e-06 | 0.000135% |
| OTU_4056  | True  | koll11  | 8.67e-07 | 7.89e-05% | 0.0 | 1 | 0.000418 | 2.09e-05 | 0.0      | 1.89e-06 | 5.68e-05% |
| OTU_8324  | True  | ZB2     | 8.64e-07 | 7.87e-05% | 0.0 | 1 | 0.0      | 3.26e-06 | 6.84e-05 | 2.41e-06 | 7.23e-05% |
| L880      | False | koll11  | 8.62e-07 | 7.85e-05% | 0.0 | 1 | 0.00723  | 0.00275  | 0.00229  | 3.13e-06 | 9.4e-05%  |
| OTU_2694  | True  | SJA-4   | 8.61e-07 | 7.84e-05% | 0.0 | 1 | 0.0      | 0.0      | 0.00012  | 2.85e-06 | 8.56e-05% |
| OTU_354   | True  | koll11  | 8.57e-07 | 7.81e-05% | 0.0 | 1 | 0.000312 | 0.0      | 1.3e-06  | 1.2e-06  | 3.62e-05% |
| OTU_363   | True  | koll11  | 8.56e-07 | 7.79e-05% | 0.0 | 1 | 0.000317 | 0.000188 | 0.0      | 3.91e-06 | 0.000117% |
| OTU_1608  | True  | koll11  | 8.55e-07 | 7.79e-05% | 0.0 | 1 | 0.000215 | 2.11e-05 | 0.0      | 2.1e-06  | 6.32e-05% |
| OTU_3117  | True  | koll11  | 8.53e-07 | 7.76e-05% | 0.0 | 1 | 0.000262 | 6.54e-05 | 0.000139 | 8.16e-06 | 0.000245% |
| OTU_827   | True  | koll11  | 8.51e-07 | 7.75e-05% | 0.0 | 1 | 0.000174 | 0.0      | 0.0      | 2.22e-06 | 6.65e-05% |
| L44       | False | OD1     | 8.51e-07 | 7.75e-05% | 0.0 | 1 | 0.104    | 0.137    | 0.0762   | 9.72e-06 | 0.000292% |
| L1203     | False | koll11  | 8.5e-07  | 7.74e-05% | 0.0 | 1 | 0.000461 | 0.000271 | 7.3e-05  | 6.6e-06  | 0.000198% |
| L888      | False | koll11  | 8.48e-07 | 7.72e-05% | 0.0 | 1 | 0.000579 | 0.000691 | 0.000171 | 1.21e-05 | 0.000362% |
| OTU_5840  | True  | OD1     | 8.46e-07 | 7.7e-05%  | 0.0 | 1 | 0.00017  | 0.000116 | 7.96e-06 | 5e-06    | 0.00015%  |
| OTU_965   | True  | PBS-25  | 8.45e-07 | 7.69e-05% | 0.0 | 1 | 0.0      | 3.2e-05  | 0.000115 | 4.19e-06 | 0.000126% |
| OTU_1558  | True  | PBS-25  | 8.45e-07 | 7.69e-05% | 0.0 | 1 | 0.000118 | 2e-05    | 0.0      | 2.66e-06 | 7.99e-05% |
| L1033     | False | koll11  | 8.43e-07 | 7.68e-05% | 0.0 | 1 | 0.000434 | 2.27e-05 | 0.000747 | 5.14e-06 | 0.000154% |
| OTU_4832  | True  | ZB2     | 8.4e-07  | 7.65e-05% | 0.0 | 1 | 0.000143 | 3.2e-06  | 0.0      | 1.17e-06 | 3.52e-05% |
| L1465     | False | ZB2     | 8.39e-07 | 7.64e-05% | 0.0 | 1 | 0.000254 | 0.00211  | 0.000806 | 5.81e-06 | 0.000174% |
| OTU_464   | True  | koll11  | 8.33e-07 | 7.58e-05% | 0.0 | 1 | 4.58e-06 | 0.000113 | 0.0      | 2.68e-06 | 8.06e-05% |
| OTU_365   | True  | koll11  | 8.26e-07 | 7.51e-05% | 0.0 | 1 | 0.000426 | 0.0      | 9.58e-05 | 2.92e-06 | 8.78e-05% |
| OTU_9710  | True  | ABY1    | 8.25e-07 | 7.51e-05% | 0.0 | 1 | 0.000337 | 0.000105 | 4.81e-05 | 3.87e-06 | 0.000116% |
| OTU_3007  | True  | koll11  | 8.23e-07 | 7.49e-05% | 0.0 | 1 | 0.000592 | 0.000591 | 8.98e-05 | 1.01e-05 | 0.000305% |
| OTU_3762  | True  | SJA-4   | 8.18e-07 | 7.45e-05% | 0.0 | 1 | 0.000184 | 0.0      | 0.0      | 1.51e-06 | 4.52e-05% |
| OTU_4166  | True  | koll11  | 8.16e-07 | 7.43e-05% | 0.0 | 1 | 4.66e-06 | 0.000275 | 0.0      | 2.57e-06 | 7.71e-05% |
| OTU_510   | True  | koll11  | 8.15e-07 | 7.42e-05% | 0.0 | 1 | 0.000337 | 2.32e-05 | 1.96e-05 | 1.84e-06 | 5.53e-05% |
| OTU_8143  | True  | OP11-4  | 8.14e-07 | 7.41e-05% | 0.0 | 1 | 8.52e-06 | 7.23e-06 | 8.56e-05 | 4.42e-06 | 0.000133% |
| OTU_6005  | True  | SM2F11  | 8.13e-07 | 7.4e-05%  | 0.0 | 1 | 0.000206 | 0.000183 | 2.38e-05 | 6.54e-06 | 0.000196% |
| OTU_8125  | True  | ABY1    | 8.12e-07 | 7.39e-05% | 0.0 | 1 | 0.000508 | 0.000258 | 5.66e-06 | 2.5e-06  | 7.5e-05%  |
| L1881     | False | OD1     | 8.07e-07 | 7.35e-05% | 0.0 | 1 | 0.000193 | 1.77e-07 | 0.0      | 1.25e-06 | 3.76e-05% |
| OTU_7225  | True  | ZB2     | 8.01e-07 | 7.29e-05% | 0.0 | 1 | 0.00247  | 0.00102  | 0.00106  | 8.69e-06 | 0.000261% |
| OTU_1444  | True  | koll11  | 8e-07    | 7.28e-05% | 0.0 | 1 | 0.000284 | 6.39e-06 | 0.000259 | 3.35e-06 | 0.000101% |
| OTU_7949  | True  | ABY1    | 8e-07    | 7.28e-05% | 0.0 | 1 | 0.000654 | 0.000519 | 6.07e-05 | 5.18e-06 | 0.000155% |
| L819      | False | PBS-25  | 7.96e-07 | 7.25e-05% | 0.0 | 1 | 0.000427 | 0.00028  | 5.83e-08 | 2.87e-06 | 8.61e-05% |
| OTU_10753 | True  | OP11-3  | 7.96e-07 | 7.25e-05% | 0.0 | 1 | 0.000161 | 6.14e-05 | 5.63e-05 | 9.88e-06 | 0.000297% |
| OTU_675   | True  | PBS-25  | 7.95e-07 | 7.24e-05% | 0.0 | 1 | 0.000532 | 0.000219 | 0.00198  | 5.4e-06  | 0.000162% |
| L1635     | False | ZB2     | 7.93e-07 | 7.22e-05% | 0.0 | 1 | 0.000354 | 0.000398 | 2.34e-06 | 5.33e-06 | 0.00016%  |
| L1494     | False | ZB2     | 7.93e-07 | 7.22e-05% | 0.0 | 1 | 0.00055  | 0.000107 | 1.69e-05 | 1.54e-06 | 4.62e-05% |
| OTU_8743  | True  | OD1     | 7.85e-07 | 7.15e-05% | 0.0 | 1 | 0.000207 | 0.0      | 0.0      | 1.45e-06 | 4.35e-05% |
| OTU_7980  | True  | OP11-4  | 7.84e-07 | 7.14e-05% | 0.0 | 1 | 0.000124 | 4.38e-05 | 0.000176 | 1.07e-05 | 0.000321% |
| L1737     | False | Mb-NB09 | 7.84e-07 | 7.14e-05% | 0.0 | 1 | 0.000281 | 7.56e-05 | 0.0      | 2.2e-06  | 6.61e-05% |
| L1138     | False | koll11  | 7.83e-07 | 7.12e-05% | 0.0 | 1 | 0.000398 | 5.6e-06  | 1.77e-05 | 1.26e-06 | 3.79e-05% |
| OTU_8112  | True  | ABY1    | 7.82e-07 | 7.12e-05% | 0.0 | 1 | 0.00179  | 0.0007   | 9.49e-05 | 1.79e-06 | 5.37e-05% |
| OTU_3602  | True  | PBS-25  | 7.8e-07  | 7.1e-05%  | 0.0 | 1 | 0.000263 | 1.66e-05 | 2.77e-05 | 1.91e-06 | 5.74e-05% |
| OTU_2636  | True  | koll11  | 7.79e-07 | 7.09e-05% | 0.0 | 1 | 8.96e-05 | 0.0      | 3.72e-05 | 2.96e-06 | 8.87e-05% |
| OTU_10854 | True  | OP11-4  | 7.77e-07 | 7.07e-05% | 0.0 | 1 | 0.000153 | 0.0      | 0.0      | 1.85e-06 | 5.54e-05% |
| OTU_152   | True  | ZB2     | 7.76e-07 | 7.06e-05% | 0.0 | 1 | 0.000191 | 5.68e-06 | 5.46e-05 | 3.14e-06 | 9.42e-05% |
| OTU_7216  | True  | ZB2     | 7.74e-07 | 7.04e-05% | 0.0 | 1 | 0.000206 | 0.0      | 0.0      | 1.44e-06 | 4.31e-05% |
| OTU_339   | True  | koll11  | 7.7e-07  | 7.01e-05% | 0.0 | 1 | 0.000593 | 7.39e-05 | 2.84e-05 | 3.12e-06 | 9.35e-05% |
| OTU_6585  | True  | ZB2     | 7.69e-07 | 7e-05%    | 0.0 | 1 | 0.000152 | 4.54e-05 | 0.000119 | 1.13e-05 | 0.000338% |
| L22       | False | OD1     | 7.67e-07 | 6.99e-05% | 0.0 | 1 | 0.000222 | 0.000138 | 1.2e-05  | 3.4e-06  | 0.000102% |
| OTU_427   | True  | koll11  | 7.67e-07 | 6.98e-05% | 0.0 | 1 | 8.28e-05 | 0.000351 | 0.0      | 3.43e-06 | 0.000103% |
| L560      | False | SJA-4   | 7.52e-07 | 6.85e-05% | 0.0 | 1 | 0.000396 | 0.000531 | 1.71e-05 | 4.05e-06 | 0.000121% |
| L1156     | False | koll11  | 7.52e-07 | 6.85e-05% | 0.0 | 1 | 0.00606  | 0.000985 | 0.00466  | 4.51e-06 | 0.000135% |
| OTU_6575  | True  | ZB2     | 7.49e-07 | 6.82e-05% | 0.0 | 1 | 0.000232 | 2.05e-05 | 4.27e-05 | 1.64e-06 | 4.91e-05% |
| L870      | False | koll11  | 7.49e-07 | 6.81e-05% | 0.0 | 1 | 0.000327 | 3.15e-05 | 1.23e-05 | 1.61e-06 | 4.84e-05% |
| OTU_6217  | True  | ZB2     | 7.45e-07 | 6.78e-05% | 0.0 | 1 | 0.0      | 1.85e-05 | 0.000148 | 2.46e-06 | 7.39e-05% |
| L1436     | False | ZB2     | 7.44e-07 | 6.77e-05% | 0.0 | 1 | 0.00198  | 0.000812 | 0.000235 | 2.89e-06 | 8.67e-05% |
| OTU_8162  | True  | ABY1    | 7.42e-07 | 6.75e-05% | 0.0 | 1 | 0.0      | 9.66e-05 | 1.94e-05 | 4.75e-06 | 0.000142% |
| L865      | False | koll11  | 7.37e-07 | 6.71e-05% | 0.0 | 1 | 0.000595 | 4.9e-05  | 0.000143 | 1.84e-06 | 5.53e-05% |
| OTU_6190  | True  | ZB2     | 7.37e-07 | 6.71e-05% | 0.0 | 1 | 0.000333 | 0.000307 | 2.23e-05 | 4.25e-06 | 0.000128% |
| L749      | False | PBS-25  | 7.34e-07 | 6.68e-05% | 0.0 | 1 | 0.000501 | 5.72e-05 | 0.0      | 1.74e-06 | 5.23e-05% |
| OTU_8246  | True  | OD1     | 7.28e-07 | 6.62e-05% | 0.0 | 1 | 0.00206  | 0.00022  | 7.3e-05  | 1.11e-06 | 3.33e-05% |
| OTU_8761  | True  | OD1     | 7.25e-07 | 6.6e-05%  | 0.0 | 1 | 0.000128 | 2.3e-05  | 5.25e-07 | 1.74e-06 | 5.22e-05% |
| OTU_9088  | True  | ABY1    | 7.24e-07 | 6.59e-05% | 0.0 | 1 | 8.4e-06  | 0.000141 | 0.0      | 2.75e-06 | 8.24e-05% |

|           |       |          |          |           |     |   |          |          |          |                    |                     |
|-----------|-------|----------|----------|-----------|-----|---|----------|----------|----------|--------------------|---------------------|
| L1024     | False | koll11   | 7.23e-07 | 6.58e-05% | 0.0 | 1 | 0.00334  | 0.000791 | 0.00143  | 4.6e-06            | 0.000138%           |
| OTU_2885  | True  | PBS-25   | 7.22e-07 | 6.57e-05% | 0.0 | 1 | 0.000405 | 0.000102 | 3.5e-06  | 1.72e-06           | 5.16e-05%           |
| OTU_16    | True  | ZB2      | 7.21e-07 | 6.56e-05% | 0.0 | 1 | 5.12e-05 | 0.0      | 0.0      | 1.22e-06           | 3.66e-05%           |
| OTU_1456  | True  | kpj58rc  | 7.2e-07  | 6.56e-05% | 0.0 | 1 | 8.21e-05 | 4.94e-06 | 0.0      | 1.57e-06           | 4.72e-05%           |
| L1366     | False | ZB2      | 7.17e-07 | 6.52e-05% | 0.0 | 1 | 1.39e-06 | 0.000934 | 0.000268 | 1.7e-06            | 5.11e-05%           |
| L1066     | False | koll11   | 7.15e-07 | 6.51e-05% | 0.0 | 1 | 0.00131  | 4.34e-05 | 0.000157 | 1.52e-06           | 4.57e-05%           |
| OTU_619   | True  | koll11   | 7.13e-07 | 6.49e-05% | 0.0 | 1 | 0.000167 | 1.35e-05 | 0.0      | 1.6e-06            | 4.81e-05%           |
| OTU_7937  | True  | ABY1     | 7.12e-07 | 6.48e-05% | 0.0 | 1 | 0.0005   | 0.0      | 0.0      | 1.37e-06           | 4.1e-05%            |
| OTU_10851 | True  | OP11-4   | 7.09e-07 | 6.45e-05% | 0.0 | 1 | 0.000114 | 1.77e-07 | 0.0      | 1.18e-06           | 3.53e-05%           |
| L797      | False | PBS-25   | 7.09e-07 | 6.45e-05% | 0.0 | 1 | 0.000513 | 0.000102 | 3.5e-06  | 1.55e-06           | 4.65e-05%           |
| OTU_4507  | True  | koll11   | 7.02e-07 | 6.39e-05% | 0.0 | 1 | 9.46e-05 | 1.73e-06 | 0.0      | 1.6e-06            | 4.81e-05%           |
| L1434     | False | ZB2      | 7e-07    | 6.37e-05% | 0.0 | 1 | 0.00198  | 0.000812 | 0.000905 | 7.92e-06           | 0.000238%           |
| L265      | False | ABY1     | 6.96e-07 | 6.34e-05% | 0.0 | 1 | 0.00226  | 0.00151  | 0.000986 | 1.26e-05           | 0.000379%           |
| L1907     | False | OD1      | 6.94e-07 | 6.32e-05% | 0.0 | 1 | 0.000755 | 4.2e-05  | 5.97e-06 | 9.8e-07            | 2.94e-05%           |
| OTU_602   | True  | koll11   | 6.85e-07 | 6.24e-05% | 0.0 | 1 | 0.000197 | 7.6e-05  | 1.97e-05 | 3.76e-06           | 0.000113%           |
| L18       | False | OD1      | 6.85e-07 | 6.23e-05% | 0.0 | 1 | 0.00027  | 3.27e-05 | 5.45e-06 | 1.22e-06           | 3.67e-05%           |
| OTU_5241  | True  | Mb-NB09  | 6.81e-07 | 6.2e-05%  | 0.0 | 1 | 0.0      | 8.58e-05 | 0.0      | 1.98e-06           | 5.93e-05%           |
| OTU_9084  | True  | TM7-1    | 6.78e-07 | 6.17e-05% | 0.0 | 1 | 6.01e-05 | 0.000223 | 1.63e-05 | 5.41e-06           | 0.000162%           |
| L414      | False | ABY1     | 6.74e-07 | 6.14e-05% | 0.0 | 1 | 0.000204 | 0.000488 | 0.00154  | 4.86e-06           | 0.000146%           |
| OTU_3345  | True  | PBS-25   | 6.72e-07 | 6.11e-05% | 0.0 | 1 | 0.000175 | 0.0      | 2.35e-07 | 1.23e-06           | 3.7e-05%            |
| OTU_421   | True  | koll11   | 6.69e-07 | 6.09e-05% | 0.0 | 1 | 0.000582 | 1.62e-05 | 4.75e-06 | 8.13e-07           | 2.44e-05%           |
| OTU_1428  | True  | GIF10    | 6.67e-07 | 6.07e-05% | 0.0 | 1 | 8.93e-05 | 4.59e-06 | 1.44e-05 | 2.31e-06           | 6.95e-05%           |
| L997      | False | koll11   | 6.64e-07 | 6.04e-05% | 0.0 | 1 | 0.000809 | 0.000448 | 0.00029  | 8.2e-06            | 0.000246%           |
| OTU_10757 | True  | OP11-4   | 6.62e-07 | 6.03e-05% | 0.0 | 1 | 0.000293 | 0.000164 | 5.7e-05  | 4.65e-06           | 0.00014%            |
| OTU_8390  | True  | ABY1     | 6.62e-07 | 6.02e-05% | 0.0 | 1 | 0.000369 | 2.22e-05 | 4.17e-06 | 1.66e-06           | 4.98e-05%           |
| OTU_282   | True  | koll11   | 6.54e-07 | 5.96e-05% | 0.0 | 1 | 9.22e-05 | 5.59e-06 | 2.98e-06 | 1.38e-06           | 4.15e-05%           |
| OTU_1061  | True  | PBS-25   | 6.54e-07 | 5.96e-05% | 0.0 | 1 | 8.38e-05 | 2.26e-05 | 0.0      | 3.05e-06           | 9.16e-05%           |
| OTU_6574  | True  | ZB2      | 6.54e-07 | 5.95e-05% | 0.0 | 1 | 0.000317 | 5.95e-05 | 1.69e-05 | 1.59e-06           | 4.76e-05%           |
| OTU_5626  | True  | OD1      | 6.52e-07 | 5.94e-05% | 0.0 | 1 | 0.000103 | 0.0      | 0.0      | 1.18e-06           | 3.55e-05%           |
| L780      | False | PBS-25   | 6.51e-07 | 5.93e-05% | 0.0 | 1 | 0.000564 | 0.000133 | 5.83e-08 | 1.51e-06           | 4.53e-05%           |
| OTU_3013  | True  | PBS-25   | 6.48e-07 | 5.9e-05%  | 0.0 | 1 | 1.43e-05 | 0.000255 | 0.0      | 2.75e-06           | 8.25e-05%           |
| OTU_9434  | True  | ABY1     | 6.44e-07 | 5.86e-05% | 0.0 | 1 | 9.47e-05 | 0.0      | 0.0      | 9.93e-07           | 2.98e-05%           |
| OTU_9703  | True  | Mb-NB09  | 6.39e-07 | 5.82e-05% | 0.0 | 1 | 0.000127 | 0.0      | 0.0      | 1.5e-06            | 4.5e-05%            |
| L401      | False | ABY1     | 6.39e-07 | 5.81e-05% | 0.0 | 1 | 0.0069   | 0.00337  | 0.000848 | 2.06e-06           | 6.18e-05%           |
| OTU_10816 | True  | OP11-4   | 6.36e-07 | 5.79e-05% | 0.0 | 1 | 0.000154 | 8.11e-05 | 4.27e-06 | 3.12e-06           | 9.36e-05%           |
| L543      | False | SJA-4    | 6.35e-07 | 5.78e-05% | 0.0 | 1 | 0.00155  | 0.000451 | 0.00194  | 7.73e-06           | 0.000232%           |
| L567      | False | SJA-4    | 6.34e-07 | 5.77e-05% | 0.0 | 1 | 0.00073  | 3.47e-07 | 0.000456 | 3.19e-06           | 9.57e-05%           |
| OTU_8350  | True  | ABY1     | 6.3e-07  | 5.73e-05% | 0.0 | 1 | 8.75e-05 | 0.0      | 0.0      | 1.02e-06           | 3.07e-05%           |
| OTU_1550  | True  | PRR-12   | 6.3e-07  | 5.73e-05% | 0.0 | 1 | 0.000183 | 1.62e-05 | 0.0      | 1.46e-06           | 4.39e-05%           |
| OTU_6533  | True  | OD1      | 6.28e-07 | 5.71e-05% | 0.0 | 1 | 0.0      | 0.000389 | 0.000607 | 3.26e-06           | 9.77e-05%           |
| OTU_4039  | True  | koll11   | 6.2e-07  | 5.65e-05% | 0.0 | 1 | 0.000109 | 4.33e-05 | 0.0      | 2.73e-06           | 8.2e-05%            |
| OTU_6076  | True  | SM2F11   | 6.18e-07 | 5.62e-05% | 0.0 | 1 | 8.43e-05 | 1.27e-05 | 0.0      | 1.72e-06           | 5.16e-05%           |
| L1347     | False | ZB2      | 6.15e-07 | 5.6e-05%  | 0.0 | 1 | 0.000542 | 0.000225 | 0.000139 | 3.85e-06           | 0.000116%           |
| OTU_6160  | True  | ZB2      | 6.07e-07 | 5.53e-05% | 0.0 | 1 | 4.51e-05 | 0.000696 | 0.000548 | 2.26e-06           | 6.78e-05%           |
| L25       | False | Bacteria | 6.07e-07 | 5.52e-05% | 0.0 | 1 | 0.994    | 0.997    | 1.0      | -3.93486222055e-07 | -1.18085856031e-05% |
| L591      | False | PRR-12   | 6.06e-07 | 5.52e-05% | 0.0 | 1 | 0.00175  | 0.000151 | 0.000169 | 9.33e-07           | 2.8e-05%            |
| OTU_6617  | True  | ZB2      | 6.05e-07 | 5.51e-05% | 0.0 | 1 | 0.0      | 0.000265 | 3.27e-05 | 2.19e-06           | 6.57e-05%           |
| OTU_466   | True  | koll11   | 6.03e-07 | 5.49e-05% | 0.0 | 1 | 0.000173 | 0.00027  | 8.15e-05 | 1.82e-05           | 0.000547%           |
| L650      | False | koll11   | 5.96e-07 | 5.42e-05% | 0.0 | 1 | 0.000397 | 3.92e-05 | 3.54e-05 | 1.76e-06           | 5.27e-05%           |
| OTU_211   | True  | koll11   | 5.94e-07 | 5.41e-05% | 0.0 | 1 | 5.27e-05 | 7.58e-05 | 0.0      | 4.35e-06           | 0.000131%           |
| OTU_19    | True  | ZB2      | 5.92e-07 | 5.39e-05% | 0.0 | 1 | 0.000127 | 7.61e-06 | 1.8e-05  | 1.82e-06           | 5.46e-05%           |
| L1814     | False | OD1      | 5.88e-07 | 5.35e-05% | 0.0 | 1 | 0.000905 | 0.000715 | 0.000115 | 4.44e-06           | 0.000133%           |
| L545      | False | SJA-4    | 5.85e-07 | 5.33e-05% | 0.0 | 1 | 0.000377 | 0.000181 | 0.00155  | 3.39e-06           | 0.000102%           |
| OTU_1538  | True  | PBS-25   | 5.8e-07  | 5.28e-05% | 0.0 | 1 | 0.000133 | 5.72e-05 | 0.0      | 2.72e-06           | 8.17e-05%           |
| OTU_1067  | True  | koll11   | 5.8e-07  | 5.28e-05% | 0.0 | 1 | 0.000251 | 4.9e-05  | 0.000132 | 4.52e-06           | 0.000136%           |
| L668      | False | koll11   | 5.77e-07 | 5.26e-05% | 0.0 | 1 | 0.000681 | 0.000591 | 0.000127 | 7.47e-06           | 0.000224%           |
| OTU_8168  | True  | ZB2      | 5.68e-07 | 5.17e-05% | 0.0 | 1 | 0.0      | 8.29e-05 | 0.0      | 2.07e-06           | 6.2e-05%            |
| OTU_6199  | True  | ZB2      | 5.68e-07 | 5.17e-05% | 0.0 | 1 | 0.000325 | 0.0      | 0.0      | 1.14e-06           | 3.43e-05%           |
| OTU_8787  | True  | ABY1     | 5.66e-07 | 5.15e-05% | 0.0 | 1 | 6.2e-05  | 0.000303 | 0.000198 | 9.19e-06           | 0.000276%           |
| L1418     | False | ZB2      | 5.53e-07 | 5.04e-05% | 0.0 | 1 | 0.000462 | 6.77e-05 | 0.000689 | 4.75e-06           | 0.000142%           |
| OTU_2442  | True  | koll11   | 5.49e-07 | 5e-05%    | 0.0 | 1 | 0.000105 | 1.5e-05  | 0.0      | 1.97e-06           | 5.92e-05%           |
| OTU_4179  | True  | koll11   | 5.48e-07 | 4.99e-05% | 0.0 | 1 | 0.000746 | 4.73e-05 | 0.00145  | 3.18e-06           | 9.54e-05%           |
| OTU_171   | True  | koll11   | 5.44e-07 | 4.96e-05% | 0.0 | 1 | 0.00109  | 0.000538 | 0.000802 | 1.12e-05           | 0.000337%           |
| OTU_4272  | True  | koll11   | 5.44e-07 | 4.95e-05% | 0.0 | 1 | 0.000464 | 0.000222 | 1.88e-05 | 2.03e-06           | 6.09e-05%           |

|           |       |          |          |           |     |   |          |          |          |                   |                     |
|-----------|-------|----------|----------|-----------|-----|---|----------|----------|----------|-------------------|---------------------|
| OTU_2664  | True  | koll11   | 5.43e-07 | 4.94e-05% | 0.0 | 1 | 9.29e-05 | 6.58e-05 | 2.8e-06  | 3.18e-06          | 9.56e-05%           |
| L883      | False | koll11   | 5.4e-07  | 4.91e-05% | 0.0 | 1 | 0.00332  | 0.00169  | 0.000588 | 2.44e-06          | 7.33e-05%           |
| OTU_4071  | True  | koll11   | 5.38e-07 | 4.9e-05%  | 0.0 | 1 | 0.000341 | 4.28e-05 | 1.11e-05 | 1.28e-06          | 3.84e-05%           |
| OTU_7173  | True  | OD1      | 5.35e-07 | 4.87e-05% | 0.0 | 1 | 0.00011  | 0.000149 | 2.88e-06 | 4.15e-06          | 0.000125%           |
| OTU_4770  | True  | GIF10    | 5.35e-07 | 4.87e-05% | 0.0 | 1 | 0.000272 | 6.93e-05 | 0.000164 | 6.16e-06          | 0.000185%           |
| OTU_129   | True  | OD1      | 5.32e-07 | 4.84e-05% | 0.0 | 1 | 8.14e-06 | 6.62e-05 | 3.45e-05 | 9.08e-06          | 0.000272%           |
| OTU_470   | True  | koll11   | 5.28e-07 | 4.8e-05%  | 0.0 | 1 | 0.0      | 0.000107 | 0.0      | 1.53e-06          | 4.58e-05%           |
| OTU_912   | True  | BD4-9    | 5.28e-07 | 4.8e-05%  | 0.0 | 1 | 0.00029  | 0.0      | 0.0      | 9.82e-07          | 2.95e-05%           |
| L1243     | False | TM7-1    | 5.26e-07 | 4.79e-05% | 0.0 | 1 | 0.0117   | 0.012    | 0.0151   | 0.000122          | 0.00368%            |
| OTU_7016  | True  | ZB2      | 5.25e-07 | 4.78e-05% | 0.0 | 1 | 0.0      | 0.000107 | 2.18e-05 | 1.85e-06          | 5.54e-05%           |
| OTU_4334  | True  | koll11   | 5.25e-07 | 4.77e-05% | 0.0 | 1 | 0.00105  | 0.000235 | 0.00046  | 2.9e-06           | 8.69e-05%           |
| OTU_8638  | True  | ABY1     | 5.19e-07 | 4.72e-05% | 0.0 | 1 | 0.000149 | 0.0      | 0.0      | 9.62e-07          | 2.89e-05%           |
| OTU_5076  | True  | ZB2      | 5.08e-07 | 4.62e-05% | 0.0 | 1 | 0.000213 | 5.21e-05 | 8.16e-05 | 3e-06             | 9.02e-05%           |
| OTU_2628  | True  | SJA-4    | 5.07e-07 | 4.61e-05% | 0.0 | 1 | 0.0      | 3.74e-05 | 0.000127 | 3.34e-06          | 0.0001%             |
| L559      | False | SJA-4    | 5.06e-07 | 4.6e-05%  | 0.0 | 1 | 0.00171  | 0.000531 | 0.000474 | 4.15e-06          | 0.000125%           |
| L373      | False | ABY1     | 4.99e-07 | 4.54e-05% | 0.0 | 1 | 0.000429 | 0.000226 | 0.000229 | 1.19e-05          | 0.000357%           |
| OTU_8156  | True  | OP11-4   | 4.98e-07 | 4.53e-05% | 0.0 | 1 | 3.18e-05 | 6.35e-05 | 1.24e-05 | 8.69e-06          | 0.000261%           |
| OTU_1982  | True  | koll11   | 4.95e-07 | 4.5e-05%  | 0.0 | 1 | 0.000131 | 4.24e-05 | 1.41e-05 | 2.67e-06          | 8.01e-05%           |
| L1081     | False | koll11   | 4.95e-07 | 4.5e-05%  | 0.0 | 1 | 0.000364 | 4.86e-05 | 3.3e-05  | 1.55e-06          | 4.65e-05%           |
| OTU_10815 | True  | OP11-4   | 4.94e-07 | 4.49e-05% | 0.0 | 1 | 0.0      | 0.0      | 3.88e-05 | 1.64e-06          | 4.92e-05%           |
| OTU_9148  | True  | ABY1     | 4.92e-07 | 4.48e-05% | 0.0 | 1 | 9.16e-06 | 9.61e-05 | 0.0      | 2.03e-06          | 6.1e-05%            |
| L1762     | False | OD1      | 4.89e-07 | 4.45e-05% | 0.0 | 1 | 0.000359 | 0.000211 | 0.000298 | 2.92e-05          | 0.000875%           |
| OTU_6693  | True  | ZB2      | 4.83e-07 | 4.39e-05% | 0.0 | 1 | 0.0      | 0.000286 | 8.01e-05 | 3.05e-06          | 9.17e-05%           |
| OTU_8045  | True  | OD1      | 4.77e-07 | 4.35e-05% | 0.0 | 1 | 0.000653 | 0.000575 | 0.000149 | 4.36e-06          | 0.000131%           |
| OTU_402   | True  | PBS-25   | 4.76e-07 | 4.33e-05% | 0.0 | 1 | 0.0      | 0.0      | 0.000175 | 1.24e-06          | 3.72e-05%           |
| OTU_1319  | True  | koll11   | 4.73e-07 | 4.3e-05%  | 0.0 | 1 | 0.000186 | 0.000377 | 2.69e-05 | 4.02e-06          | 0.000121%           |
| OTU_8181  | True  | OP11-4   | 4.72e-07 | 4.3e-05%  | 0.0 | 1 | 0.000105 | 6.11e-06 | 0.000132 | 2.74e-06          | 8.22e-05%           |
| OTU_9183  | True  | ABY1     | 4.72e-07 | 4.29e-05% | 0.0 | 1 | 0.000335 | 6.63e-05 | 2.45e-05 | 1.68e-06          | 5.05e-05%           |
| L903      | False | koll11   | 4.7e-07  | 4.28e-05% | 0.0 | 1 | 0.000788 | 0.000352 | 0.000582 | 8.35e-06          | 0.000251%           |
| OTU_7089  | True  | ABY1     | 4.54e-07 | 4.13e-05% | 0.0 | 1 | 9.12e-05 | 2.6e-05  | 7.06e-07 | 1.54e-06          | 4.61e-05%           |
| OTU_305   | True  | PBS-25   | 4.5e-07  | 4.1e-05%  | 0.0 | 1 | 0.000166 | 8.15e-06 | 0.000272 | 2.42e-06          | 7.27e-05%           |
| L1477     | False | ZB2      | 4.5e-07  | 4.09e-05% | 0.0 | 1 | 0.000675 | 0.000387 | 0.000302 | 9.46e-06          | 0.000284%           |
| OTU_1725  | True  | koll11   | 4.48e-07 | 4.08e-05% | 0.0 | 1 | 4.28e-05 | 0.0      | 0.0      | 9.63e-07          | 2.89e-05%           |
| OTU_2558  | True  | SJA-4    | 4.47e-07 | 4.07e-05% | 0.0 | 1 | 3.61e-05 | 0.00011  | 1.2e-05  | 4.26e-06          | 0.000128%           |
| OTU_1496  | True  | koll11   | 4.45e-07 | 4.05e-05% | 0.0 | 1 | 0.000121 | 6.93e-05 | 0.0      | 1.94e-06          | 5.81e-05%           |
| OTU_5311  | True  | OD1      | 4.45e-07 | 4.05e-05% | 0.0 | 1 | 0.000259 | 0.000132 | 2.02e-05 | 2.11e-06          | 6.34e-05%           |
| OTU_7976  | True  | ABY1     | 4.41e-07 | 4.01e-05% | 0.0 | 1 | 2.27e-05 | 0.00014  | 2.45e-05 | 3.63e-06          | 0.000109%           |
| OTU_880   | True  | koll11   | 4.31e-07 | 3.92e-05% | 0.0 | 1 | 7.26e-05 | 0.0      | 0.0      | 1.09e-06          | 3.26e-05%           |
| L151      | False | ABY1     | 4.31e-07 | 3.92e-05% | 0.0 | 1 | 0.000657 | 0.000332 | 0.000201 | 4.82e-06          | 0.000145%           |
| L885      | False | koll11   | 4.27e-07 | 3.89e-05% | 0.0 | 1 | 0.00183  | 0.00155  | 0.000255 | 2.33e-06          | 7e-05%              |
| L21       | False | Bacteria | 4.25e-07 | 3.87e-05% | 0.0 | 1 | 0.994    | 0.997    | 1.0      | -2.8405084632e-07 | -8.52441215576e-06% |
| OTU_5955  | True  | OD1      | 4.25e-07 | 3.87e-05% | 0.0 | 1 | 0.000121 | 3.75e-05 | 1.03e-05 | 1.92e-06          | 5.77e-05%           |
| OTU_10860 | True  | OP11     | 4.23e-07 | 3.85e-05% | 0.0 | 1 | 0.000271 | 0.000315 | 8.21e-06 | 2.32e-06          | 6.97e-05%           |
| OTU_8732  | True  | ABY1     | 4.21e-07 | 3.83e-05% | 0.0 | 1 | 0.000215 | 8.77e-05 | 7.49e-06 | 1.43e-06          | 4.29e-05%           |
| OTU_6316  | True  | ZB2      | 4.18e-07 | 3.8e-05%  | 0.0 | 1 | 0.000462 | 6.77e-05 | 2.87e-05 | 1e-06             | 3e-05%              |
| OTU_9149  | True  | TM7-1    | 4.14e-07 | 3.77e-05% | 0.0 | 1 | 0.0      | 0.000175 | 0.0      | 1.2e-06           | 3.6e-05%            |
| OTU_718   | True  | PBS-25   | 4.14e-07 | 3.77e-05% | 0.0 | 1 | 0.000496 | 0.000107 | 2.73e-05 | 1.11e-06          | 3.34e-05%           |
| OTU_6059  | True  | ABY1     | 4.14e-07 | 3.76e-05% | 0.0 | 1 | 0.0      | 3.35e-05 | 6.21e-06 | 2.62e-06          | 7.86e-05%           |
| OTU_603   | True  | koll11   | 4.11e-07 | 3.74e-05% | 0.0 | 1 | 9.45e-05 | 4.06e-06 | 0.0      | 9.55e-07          | 2.87e-05%           |
| OTU_5444  | True  | OD1      | 4.07e-07 | 3.71e-05% | 0.0 | 1 | 6.17e-05 | 1.9e-05  | 2.28e-06 | 1.73e-06          | 5.19e-05%           |
| L897      | False | koll11   | 4.06e-07 | 3.7e-05%  | 0.0 | 1 | 0.0016   | 0.000756 | 0.000867 | 5.47e-06          | 0.000164%           |
| OTU_8169  | True  | TM7-3    | 4.05e-07 | 3.68e-05% | 0.0 | 1 | 3.44e-06 | 0.000104 | 0.0      | 1.68e-06          | 5.05e-05%           |
| OTU_3798  | True  | PBS-25   | 4.03e-07 | 3.67e-05% | 0.0 | 1 | 0.000108 | 0.0      | 0.0      | 8.6e-07           | 2.58e-05%           |
| OTU_5818  | True  | OD1      | 3.98e-07 | 3.62e-05% | 0.0 | 1 | 0.00145  | 0.000193 | 0.000385 | 1.11e-06          | 3.34e-05%           |
| OTU_7954  | True  | OD1      | 3.94e-07 | 3.59e-05% | 0.0 | 1 | 0.000628 | 0.000126 | 4.67e-05 | 1.35e-06          | 4.05e-05%           |
| L755      | False | PBS-25   | 3.91e-07 | 3.56e-05% | 0.0 | 1 | 0.00119  | 0.000117 | 0.00176  | 2.59e-06          | 7.78e-05%           |
| L179      | False | SM2F11   | 3.9e-07  | 3.55e-05% | 0.0 | 1 | 0.00029  | 0.000195 | 2.38e-05 | 2.11e-06          | 6.33e-05%           |
| L290      | False | ABY1     | 3.89e-07 | 3.54e-05% | 0.0 | 1 | 7.06e-05 | 0.000141 | 1.34e-05 | 4.32e-06          | 0.00013%            |
| L891      | False | koll11   | 3.85e-07 | 3.5e-05%  | 0.0 | 1 | 0.000371 | 0.0001   | 0.0      | 1.22e-06          | 3.65e-05%           |
| OTU_10759 | True  | OP11-4   | 3.83e-07 | 3.48e-05% | 0.0 | 1 | 0.000442 | 0.000106 | 1.52e-05 | 6.84e-07          | 2.05e-05%           |
| OTU_353   | True  | koll11   | 3.8e-07  | 3.46e-05% | 0.0 | 1 | 0.000496 | 0.000445 | 0.000195 | 9.5e-06           | 0.000285%           |
| OTU_7964  | True  | ABY1     | 3.78e-07 | 3.44e-05% | 0.0 | 1 | 7.56e-05 | 0.0      | 0.0      | 8.68e-07          | 2.61e-05%           |
| L1759     | False | OD1      | 3.76e-07 | 3.42e-05% | 0.0 | 1 | 0.000272 | 0.00055  | 0.000214 | 1.66e-05          | 0.000498%           |
| OTU_875   | True  | koll11   | 3.74e-07 | 3.4e-05%  | 0.0 | 1 | 0.000105 | 1.77e-07 | 0.0      | 7.45e-07          | 2.24e-05%           |

|          |       |          |          |           |     |   |          |          |          |                    |                     |
|----------|-------|----------|----------|-----------|-----|---|----------|----------|----------|--------------------|---------------------|
| L553     | False | SJA-4    | 3.72e-07 | 3.38e-05% | 0.0 | 1 | 0.000624 | 0.00027  | 0.000268 | 6.89e-06           | 0.000207%           |
| L36      | False | ABY1     | 3.72e-07 | 3.38e-05% | 0.0 | 1 | 0.0003   | 1.52e-05 | 5.83e-08 | 5.43e-07           | 1.63e-05%           |
| OTU_6694 | True  | ZB2      | 3.68e-07 | 3.35e-05% | 0.0 | 1 | 0.0      | 0.000769 | 0.0      | 9.97e-07           | 2.99e-05%           |
| OTU_397  | True  | koll11   | 3.64e-07 | 3.31e-05% | 0.0 | 1 | 0.000194 | 0.000191 | 2.7e-05  | 2.9e-06            | 8.71e-05%           |
| OTU_287  | True  | koll11   | 3.62e-07 | 3.3e-05%  | 0.0 | 1 | 0.000233 | 4.07e-05 | 1.26e-05 | 1.01e-06           | 3.02e-05%           |
| OTU_9588 | True  | ABY1     | 3.61e-07 | 3.29e-05% | 0.0 | 1 | 6.22e-05 | 0.0      | 1.34e-05 | 1.23e-06           | 3.69e-05%           |
| OTU_4088 | True  | koll11   | 3.58e-07 | 3.26e-05% | 0.0 | 1 | 0.000172 | 3.92e-05 | 3.54e-05 | 2.36e-06           | 7.07e-05%           |
| L1625    | False | OD1      | 3.56e-07 | 3.24e-05% | 0.0 | 1 | 0.000208 | 0.00018  | 4.3e-05  | 3.94e-06           | 0.000118%           |
| L3       | False | Bacteria | 3.53e-07 | 3.22e-05% | 0.0 | 1 | 0.998    | 0.999    | 1.0      | -6.56418777537e-08 | -1.96992344117e-06% |
| OTU_6157 | True  | ZB2      | 3.52e-07 | 3.2e-05%  | 0.0 | 1 | 0.000317 | 7.78e-05 | 8.4e-05  | 1.69e-06           | 5.08e-05%           |
| OTU_5953 | True  | OD1      | 3.49e-07 | 3.18e-05% | 0.0 | 1 | 0.000358 | 0.0      | 7.26e-05 | 8.4e-07            | 2.52e-05%           |
| OTU_277  | True  | koll11   | 3.45e-07 | 3.14e-05% | 0.0 | 1 | 0.000312 | 2.56e-06 | 9.54e-05 | 8.21e-07           | 2.47e-05%           |
| L901     | False | koll11   | 3.41e-07 | 3.11e-05% | 0.0 | 1 | 0.00107  | 0.000358 | 0.00084  | 3.21e-06           | 9.63e-05%           |
| OTU_456  | True  | koll11   | 3.39e-07 | 3.09e-05% | 0.0 | 1 | 0.000234 | 0.000138 | 3.12e-05 | 2.45e-06           | 7.34e-05%           |
| L152     | False | ABY1     | 3.38e-07 | 3.08e-05% | 0.0 | 1 | 0.000408 | 0.000313 | 0.000198 | 1.14e-05           | 0.000341%           |
| L1205    | False | koll11   | 3.31e-07 | 3.02e-05% | 0.0 | 1 | 0.000144 | 0.00024  | 6.66e-05 | 6.67e-06           | 0.0002%             |
| OTU_6099 | True  | OD1      | 3.31e-07 | 3.01e-05% | 0.0 | 1 | 0.000227 | 2.62e-05 | 4.48e-06 | 1.16e-06           | 3.48e-05%           |
| OTU_424  | True  | PBS-25   | 3.21e-07 | 2.93e-05% | 0.0 | 1 | 0.000117 | 0.00016  | 1.17e-07 | 1.8e-06            | 5.39e-05%           |
| OTU_5435 | True  | OD1      | 3.2e-07  | 2.91e-05% | 0.0 | 1 | 0.000176 | 0.000146 | 4.02e-05 | 3.93e-06           | 0.000118%           |
| OTU_6251 | True  | ZB2      | 3.2e-07  | 2.91e-05% | 0.0 | 1 | 0.000172 | 3.57e-05 | 2.48e-05 | 1.5e-06            | 4.51e-05%           |
| OTU_3150 | True  | TM6      | 3.18e-07 | 2.89e-05% | 0.0 | 1 | 0.000162 | 3.09e-05 | 3.13e-06 | 9.08e-07           | 2.72e-05%           |
| OTU_8738 | True  | OD1      | 3.14e-07 | 2.86e-05% | 0.0 | 1 | 0.0      | 1.31e-05 | 7.32e-05 | 1.57e-06           | 4.72e-05%           |
| L1053    | False | koll11   | 3.1e-07  | 2.82e-05% | 0.0 | 1 | 0.00441  | 0.000685 | 0.00235  | 1.31e-06           | 3.93e-05%           |
| OTU_8089 | True  | ABY1     | 3.08e-07 | 2.81e-05% | 0.0 | 1 | 0.0      | 0.000122 | 5.22e-05 | 2.03e-06           | 6.08e-05%           |
| OTU_8669 | True  | EW055    | 3.08e-07 | 2.81e-05% | 0.0 | 1 | 0.00013  | 0.0      | 4.94e-05 | 1.34e-06           | 4.01e-05%           |
| OTU_7939 | True  | OD1      | 3.08e-07 | 2.8e-05%  | 0.0 | 1 | 6.92e-05 | 2.15e-05 | 5.31e-06 | 1.29e-06           | 3.88e-05%           |
| OTU_2708 | True  | koll11   | 3.07e-07 | 2.79e-05% | 0.0 | 1 | 0.000273 | 6.73e-05 | 7.31e-05 | 1.86e-06           | 5.58e-05%           |
| OTU_4986 | True  | ZB2      | 3.06e-07 | 2.79e-05% | 0.0 | 1 | 0.000329 | 0.000173 | 5.73e-05 | 2.53e-06           | 7.58e-05%           |
| L541     | False | SJA-4    | 3.03e-07 | 2.76e-05% | 0.0 | 1 | 0.00159  | 0.000561 | 0.00195  | 4.49e-06           | 0.000135%           |
| L637     | False | PBS-25   | 2.99e-07 | 2.72e-05% | 0.0 | 1 | 0.000218 | 6.3e-05  | 4.1e-06  | 1.24e-06           | 3.73e-05%           |
| OTU_528  | True  | koll11   | 2.97e-07 | 2.7e-05%  | 0.0 | 1 | 9.69e-05 | 1.25e-05 | 1.85e-05 | 1.37e-06           | 4.12e-05%           |
| L448     | False | OP11-4   | 2.96e-07 | 2.7e-05%  | 0.0 | 1 | 0.000114 | 1.33e-05 | 0.000217 | 1.57e-06           | 4.71e-05%           |
| OTU_5883 | True  | OD1      | 2.95e-07 | 2.69e-05% | 0.0 | 1 | 0.000116 | 8.2e-07  | 1.54e-05 | 7.5e-07            | 2.25e-05%           |
| L617     | False | BD4-9    | 2.94e-07 | 2.67e-05% | 0.0 | 1 | 0.000102 | 0.000132 | 0.0      | 1.95e-06           | 5.86e-05%           |
| OTU_7974 | True  | ABY1     | 2.86e-07 | 2.6e-05%  | 0.0 | 1 | 0.000104 | 0.000141 | 0.000218 | 2.6e-05            | 0.000779%           |
| OTU_9719 | True  | Mb-NB09  | 2.83e-07 | 2.58e-05% | 0.0 | 1 | 8.78e-05 | 0.0      | 5.89e-06 | 9.04e-07           | 2.71e-05%           |
| OTU_6920 | True  | OD1      | 2.81e-07 | 2.56e-05% | 0.0 | 1 | 0.00011  | 0.0      | 0.0      | 5.08e-07           | 1.53e-05%           |
| L219     | False | ABY1     | 2.8e-07  | 2.54e-05% | 0.0 | 1 | 0.00143  | 0.00175  | 0.00117  | 5.5e-05            | 0.00165%            |
| L1748    | False | OD1      | 2.78e-07 | 2.53e-05% | 0.0 | 1 | 0.00134  | 0.00135  | 0.00184  | 5.4e-05            | 0.00162%            |
| OTU_6645 | True  | ZB2      | 2.78e-07 | 2.53e-05% | 0.0 | 1 | 0.000157 | 0.00016  | 3.64e-05 | 3.45e-06           | 0.000104%           |
| OTU_6633 | True  | ZB2      | 2.71e-07 | 2.47e-05% | 0.0 | 1 | 0.000141 | 0.000108 | 6.31e-05 | 8.38e-06           | 0.000252%           |
| L1489    | False | ZB2      | 2.68e-07 | 2.44e-05% | 0.0 | 1 | 0.000377 | 0.000102 | 9.1e-05  | 1.19e-06           | 3.57e-05%           |
| OTU_7852 | True  | ZB2      | 2.57e-07 | 2.34e-05% | 0.0 | 1 | 4.74e-05 | 0.0      | 0.0      | 6.74e-07           | 2.02e-05%           |
| OTU_6019 | True  | ABY1     | 2.54e-07 | 2.31e-05% | 0.0 | 1 | 0.0001   | 0.000111 | 3.62e-05 | 5.46e-06           | 0.000164%           |
| OTU_5997 | True  | OD1      | 2.53e-07 | 2.3e-05%  | 0.0 | 1 | 5.39e-05 | 0.000156 | 0.000125 | 2.34e-05           | 0.000703%           |
| OTU_928  | True  | koll11   | 2.52e-07 | 2.29e-05% | 0.0 | 1 | 0.0      | 9.22e-05 | 0.0      | 9.06e-07           | 2.72e-05%           |
| OTU_2288 | True  | PBS-25   | 2.51e-07 | 2.29e-05% | 0.0 | 1 | 4.93e-05 | 1.02e-05 | 0.0      | 7.32e-07           | 2.2e-05%            |
| OTU_460  | True  | koll11   | 2.51e-07 | 2.28e-05% | 0.0 | 1 | 1.91e-05 | 0.000118 | 0.0      | 1.18e-06           | 3.54e-05%           |
| OTU_6066 | True  | OD1      | 2.48e-07 | 2.26e-05% | 0.0 | 1 | 1.89e-05 | 0.000107 | 1.58e-05 | 2.41e-06           | 7.22e-05%           |
| OTU_2611 | True  | SJA-4    | 2.43e-07 | 2.21e-05% | 0.0 | 1 | 6.36e-05 | 0.000158 | 2.35e-07 | 1e-06              | 3e-05%              |
| L1211    | False | GIF10    | 2.43e-07 | 2.21e-05% | 0.0 | 1 | 0.000171 | 9.52e-06 | 1.44e-05 | 5.53e-07           | 1.66e-05%           |
| L869     | False | koll11   | 2.42e-07 | 2.21e-05% | 0.0 | 1 | 0.00074  | 3.55e-05 | 1.23e-05 | 3.66e-07           | 1.1e-05%            |
| L27      | False | Bacteria | 2.37e-07 | 2.16e-05% | 0.0 | 1 | 0.992    | 0.997    | 1.0      | -2.34642430207e-07 | -7.04165754203e-06% |
| OTU_5486 | True  | OD1      | 2.36e-07 | 2.15e-05% | 0.0 | 1 | 0.000142 | 0.0      | 0.0      | 4.76e-07           | 1.43e-05%           |
| L288     | False | ABY1     | 2.31e-07 | 2.11e-05% | 0.0 | 1 | 0.000286 | 0.000153 | 1.34e-05 | 1.18e-06           | 3.56e-05%           |
| OTU_8795 | True  | Mb-NB09  | 2.29e-07 | 2.09e-05% | 0.0 | 1 | 0.000158 | 5.77e-05 | 0.00013  | 2.98e-06           | 8.95e-05%           |
| OTU_8328 | True  | OD1      | 2.29e-07 | 2.09e-05% | 0.0 | 1 | 0.000114 | 2.44e-05 | 5.39e-05 | 1.79e-06           | 5.38e-05%           |
| L1763    | False | OD1      | 2.12e-07 | 1.93e-05% | 0.0 | 1 | 0.000268 | 0.000211 | 0.000298 | 3.82e-05           | 0.00115%            |
| L11      | False | Bacteria | 2.12e-07 | 1.93e-05% | 0.0 | 1 | 0.995    | 0.998    | 1.0      | -9.17483848654e-08 | -2.75338397104e-06% |
| L221     | False | ABY1     | 2.1e-07  | 1.91e-05% | 0.0 | 1 | 0.00106  | 0.00173  | 0.00114  | 4.28e-05           | 0.00128%            |
| OTU_6516 | True  | OD1      | 2.07e-07 | 1.88e-05% | 0.0 | 1 | 7.23e-05 | 3.76e-05 | 1.32e-05 | 2.11e-06           | 6.35e-05%           |
| L1030    | False | koll11   | 2.05e-07 | 1.86e-05% | 0.0 | 1 | 0.000901 | 0.000142 | 0.000767 | 1.56e-06           | 4.67e-05%           |
| OTU_1326 | True  | PBS-25   | 2.03e-07 | 1.85e-05% | 0.0 | 1 | 5.3e-06  | 5.1e-05  | 0.0      | 1.03e-06           | 3.08e-05%           |

|           |       |         |          |           |       |   |          |          |          |          |           |
|-----------|-------|---------|----------|-----------|-------|---|----------|----------|----------|----------|-----------|
| OTU_1514  | True  | koll11  | 1.99e-07 | 1.82e-05% | 0.0   | 1 | 7.85e-05 | 1.96e-05 | 0.0      | 6.95e-07 | 2.09e-05% |
| L217      | False | ABY1    | 1.99e-07 | 1.81e-05% | 0.0   | 1 | 0.00157  | 0.00178  | 0.00117  | 2.36e-05 | 0.000707% |
| OTU_2845  | True  | PBS-25  | 1.98e-07 | 1.81e-05% | 0.0   | 1 | 0.000365 | 0.000382 | 0.000106 | 2.34e-06 | 7.02e-05% |
| OTU_5270  | True  | OD1     | 1.96e-07 | 1.78e-05% | 0.0   | 1 | 0.000122 | 2.94e-05 | 1.35e-05 | 1.13e-06 | 3.38e-05% |
| OTU_6642  | True  | ZB2     | 1.94e-07 | 1.77e-05% | 0.0   | 1 | 0.000169 | 2.2e-05  | 3.64e-06 | 5.05e-07 | 1.52e-05% |
| L1224     | False | koll11  | 1.91e-07 | 1.74e-05% | 0.0   | 1 | 0.000395 | 0.000283 | 0.00043  | 1.53e-05 | 0.000458% |
| OTU_1439  | True  | koll11  | 1.9e-07  | 1.73e-05% | 0.0   | 1 | 0.000104 | 2.83e-05 | 0.0      | 6.39e-07 | 1.92e-05% |
| OTU_9194  | True  | ABY1    | 1.89e-07 | 1.72e-05% | 0.0   | 1 | 5.37e-05 | 0.0      | 1.49e-05 | 6.89e-07 | 2.07e-05% |
| OTU_6682  | True  | ZB2     | 1.85e-07 | 1.69e-05% | 0.0   | 1 | 0.0      | 0.000142 | 5.39e-06 | 6.29e-07 | 1.89e-05% |
| OTU_8641  | True  | ABY1    | 1.83e-07 | 1.66e-05% | 0.0   | 1 | 9e-05    | 2.41e-05 | 0.0      | 7.32e-07 | 2.2e-05%  |
| OTU_9063  | True  | Mb-NB09 | 1.82e-07 | 1.66e-05% | 0.0   | 1 | 0.000231 | 7.03e-05 | 0.0      | 6.01e-07 | 1.8e-05%  |
| OTU_1331  | True  | koll11  | 1.82e-07 | 1.65e-05% | 0.0   | 1 | 3.62e-05 | 0.000187 | 4.63e-05 | 2.28e-06 | 6.84e-05% |
| OTU_1058  | True  | koll11  | 1.82e-07 | 1.65e-05% | 0.0   | 1 | 0.000535 | 0.000321 | 0.000565 | 6.85e-06 | 0.000206% |
| L1439     | False | ZB2     | 1.79e-07 | 1.63e-05% | 0.0   | 1 | 0.000302 | 8.04e-05 | 9.29e-05 | 1.21e-06 | 3.62e-05% |
| OTU_8041  | True  | TM7-3   | 1.78e-07 | 1.62e-05% | 0.0   | 1 | 5.72e-05 | 0.0      | 0.0      | 4.01e-07 | 1.2e-05%  |
| OTU_3297  | True  | PBS-25  | 1.77e-07 | 1.61e-05% | 0.0   | 1 | 0.000332 | 0.000102 | 0.00022  | 1.45e-06 | 4.35e-05% |
| OTU_1626  | True  | PBS-25  | 1.76e-07 | 1.6e-05%  | 0.0   | 1 | 0.000196 | 0.0      | 0.0      | 2.94e-07 | 8.83e-06% |
| OTU_6085  | True  | ZB2     | 1.73e-07 | 1.57e-05% | 0.0   | 1 | 0.000161 | 0.000261 | 3.14e-06 | 1.2e-06  | 3.6e-05%  |
| OTU_5924  | True  | OD1     | 1.63e-07 | 1.49e-05% | 0.0   | 1 | 0.000105 | 0.000232 | 2.91e-07 | 7.99e-07 | 2.4e-05%  |
| OTU_1096  | True  | koll11  | 1.63e-07 | 1.48e-05% | 0.0   | 1 | 0.000108 | 5.37e-05 | 2.03e-05 | 1.16e-06 | 3.47e-05% |
| L1226     | False | koll11  | 1.61e-07 | 1.47e-05% | 0.0   | 1 | 0.000201 | 0.000253 | 0.00043  | 9.2e-06  | 0.000276% |
| OTU_10804 | True  | OP11-4  | 1.59e-07 | 1.45e-05% | 0.0   | 1 | 0.000332 | 1.01e-05 | 8.03e-05 | 4.42e-07 | 1.32e-05% |
| L965      | False | koll11  | 1.58e-07 | 1.43e-05% | 0.0   | 1 | 0.00052  | 0.000565 | 7.77e-05 | 1.13e-06 | 3.39e-05% |
| OTU_136   | True  | OD1     | 1.57e-07 | 1.43e-05% | 0.0   | 1 | 3.78e-05 | 2.88e-05 | 0.0      | 7.93e-07 | 2.38e-05% |
| OTU_458   | True  | koll11  | 1.52e-07 | 1.38e-05% | 0.0   | 1 | 2.76e-05 | 0.000147 | 3.41e-05 | 1.9e-06  | 5.7e-05%  |
| L1749     | False | OD1     | 1.49e-07 | 1.35e-05% | 0.0   | 1 | 0.000979 | 0.00114  | 0.00154  | 2.43e-05 | 0.00073%  |
| OTU_878   | True  | koll11  | 1.45e-07 | 1.32e-05% | 0.0   | 1 | 8.95e-05 | 6.29e-06 | 1.29e-05 | 5.13e-07 | 1.54e-05% |
| L804      | False | PBS-25  | 1.3e-07  | 1.18e-05% | 0.0   | 1 | 1.43e-05 | 0.000255 | 0.000288 | 1.71e-06 | 5.13e-05% |
| L1216     | False | koll11  | 1.27e-07 | 1.16e-05% | 0.0   | 1 | 0.000724 | 0.000688 | 0.000423 | 7.97e-06 | 0.000239% |
| L223      | False | ABY1    | 1.24e-07 | 1.13e-05% | 0.0   | 1 | 0.00105  | 0.00107  | 0.000805 | 2.77e-05 | 0.000832% |
| OTU_459   | True  | koll11  | 1.23e-07 | 1.12e-05% | 0.0   | 1 | 0.000467 | 0.000489 | 7.77e-05 | 9.97e-07 | 2.99e-05% |
| OTU_5359  | True  | Mb-NB09 | 1.22e-07 | 1.11e-05% | 0.0   | 1 | 6.95e-05 | 7.63e-07 | 2.83e-06 | 3.23e-07 | 9.68e-06% |
| L1619     | False | OD1     | 1.2e-07  | 1.1e-05%  | 0.0   | 1 | 0.00197  | 0.00242  | 0.000736 | 1.58e-06 | 4.73e-05% |
| L1755     | False | OD1     | 1.14e-07 | 1.04e-05% | 0.0   | 1 | 0.000465 | 0.000938 | 0.000821 | 1.57e-05 | 0.000472% |
| OTU_6580  | True  | ZB2     | 1.14e-07 | 1.04e-05% | 0.0   | 1 | 1.8e-05  | 5.67e-05 | 8.01e-05 | 2.96e-06 | 8.9e-05%  |
| OTU_9018  | True  | Mb-NB09 | 1.1e-07  | 9.97e-06% | 0.0   | 1 | 6.6e-05  | 1.66e-05 | 3.59e-05 | 1.29e-06 | 3.88e-05% |
| OTU_1646  | True  | PBS-25  | 1.07e-07 | 9.73e-06% | 0.0   | 1 | 0.000135 | 1.77e-05 | 8.44e-05 | 9.44e-07 | 2.83e-05% |
| OTU_4502  | True  | koll11  | 1.04e-07 | 9.44e-06% | 0.0   | 1 | 0.00017  | 1.77e-07 | 0.0      | 2.2e-07  | 6.6e-06%  |
| OTU_8165  | True  | ABY1    | 1.02e-07 | 9.33e-06% | 0.0   | 1 | 3.21e-05 | 8.76e-05 | 2.47e-05 | 2.57e-06 | 7.71e-05% |
| OTU_8234  | True  | ABY1    | 1.01e-07 | 9.16e-06% | 0.0   | 1 | 6.8e-05  | 5.99e-05 | 1.81e-05 | 1.67e-06 | 5.02e-05% |
| L1032     | False | koll11  | 9.5e-08  | 8.65e-06% | 0.0   | 1 | 0.000632 | 9.87e-05 | 0.000767 | 7.77e-07 | 2.33e-05% |
| L1217     | False | koll11  | 9.24e-08 | 8.41e-06% | 0.0   | 1 | 0.000155 | 0.000372 | 0.000368 | 1.01e-05 | 0.000303% |
| OTU_4774  | True  | koll11  | 7.41e-08 | 6.74e-06% | 0.0   | 1 | 0.000199 | 0.000243 | 0.00012  | 4.97e-06 | 0.000149% |
| OTU_6684  | True  | ZB2     | 7.31e-08 | 6.65e-06% | 0.0   | 1 | 0.000145 | 8.18e-05 | 4.83e-05 | 1.01e-06 | 3.04e-05% |
| OTU_8154  | True  | OP11-4  | 7.23e-08 | 6.58e-06% | 0.0   | 1 | 7.26e-05 | 1e-05    | 1.62e-05 | 3.76e-07 | 1.13e-05% |
| OTU_8890  | True  | ABY1    | 6.56e-08 | 5.97e-06% | 0.0   | 1 | 0.0      | 5.47e-06 | 0.0      | 1.92e-07 | 5.75e-06% |
| L898      | False | koll11  | 6.28e-08 | 5.72e-06% | 0.0   | 1 | 0.000524 | 0.000398 | 2.69e-05 | 4.43e-07 | 1.33e-05% |
| OTU_4497  | True  | koll11  | 5.28e-08 | 4.8e-06%  | 0.0   | 1 | 0.000141 | 1.12e-05 | 0.0      | 1.41e-07 | 4.24e-06% |
| OTU_1883  | True  | koll11  | 5.25e-08 | 4.78e-06% | 0.0   | 1 | 0.000139 | 1.48e-05 | 8.44e-06 | 1.6e-07  | 4.8e-06%  |
| OTU_831   | True  | koll11  | 4.95e-08 | 4.5e-06%  | 0.0   | 1 | 0.000295 | 2.88e-05 | 0.0      | 1.04e-07 | 3.13e-06% |
| L1362     | False | OD1     | 4.55e-08 | 4.14e-06% | 0.0   | 1 | 0.077    | 0.696    | 0.738    | 1.55e-08 | 4.66e-07% |
| OTU_4864  | True  | GIF10   | 4.54e-08 | 4.13e-06% | 0.0   | 1 | 9.21e-05 | 7.59e-06 | 0.0      | 1.06e-07 | 3.18e-06% |
| L1377     | False | OD1     | 4.48e-08 | 4.08e-06% | 0.0   | 1 | 0.0159   | 0.564    | 0.479    | 2.69e-08 | 8.07e-07% |
| OTU_8167  | True  | ZB2     | 3.9e-08  | 3.55e-06% | 0.0   | 1 | 0.000141 | 0.000328 | 0.000177 | 2.66e-06 | 7.98e-05% |
| L1364     | False | OD1     | 3.87e-08 | 3.53e-06% | 0.0   | 1 | 0.0654   | 0.642    | 0.579    | 2.01e-08 | 6.03e-07% |
| OTU_8084  | True  | ABY1    | 3.49e-08 | 3.18e-06% | 0.0   | 1 | 0.000122 | 8.61e-05 | 0.000166 | 1.63e-06 | 4.89e-05% |
| L570      | False | SJA-4   | 2.29e-08 | 2.08e-06% | 0.0   | 1 | 0.000143 | 0.00023  | 0.000127 | 4.1e-06  | 0.000123% |
| OTU_8017  | True  | ABY1    | 2.04e-08 | 1.85e-06% | 0.001 | 0 | 4.16e-05 | 4.62e-05 | 2.12e-05 | 7.85e-07 | 2.36e-05% |
| OTU_5992  | True  | ZB2     | 1.61e-08 | 1.47e-06% | 0.0   | 1 | 0.00244  | 0.208    | 0.13     | 2.53e-08 | 7.59e-07% |
| OTU_1177  | True  | OP3     | 1.18e-08 | 1.07e-06% | 0.014 | 0 | 0.000117 | 0.000135 | 8.85e-05 | 2.41e-06 | 7.22e-05% |
| L970      | False | koll11  | 1.17e-08 | 1.07e-06% | 0.0   | 1 | 0.187    | 0.028    | 0.0363   | 4.18e-09 | 1.26e-07% |
| L1007     | False | koll11  | 5.93e-09 | 5.4e-07%  | 0.0   | 1 | 0.0996   | 0.0149   | 0.0241   | 3.41e-09 | 1.02e-07% |
| L1433     | False | ZB2     | 3.57e-09 | 3.25e-07% | 0.0   | 1 | 0.00486  | 0.0436   | 0.064    | 5.04e-09 | 1.51e-07% |
| L808      | False | OP3     | 3.37e-09 | 3.07e-07% | 0.0   | 1 | 0.0451   | 0.00553  | 0.00698  | 2.73e-09 | 8.2e-08%  |
| L953      | False | koll11  | 2.32e-09 | 2.11e-07% | 0.0   | 1 | 0.0257   | 0.00305  | 0.00189  | 2.1e-09  | 6.31e-08% |

|          |       |          |          |           |        |   |          |          |          |          |           |
|----------|-------|----------|----------|-----------|--------|---|----------|----------|----------|----------|-----------|
| L1280    | False | TM7-3    | 2.22e-09 | 2.02e-07% | 0.0    | 1 | 0.0103   | 0.000291 | 0.0265   | 1.1e-08  | 3.32e-07% |
| L1498    | False | ZB2      | 2.01e-09 | 1.83e-07% | 0.0    | 1 | 0.000497 | 0.024    | 0.0253   | 6.63e-09 | 1.99e-07% |
| L468     | False | OP11-4   | 1.83e-09 | 1.67e-07% | 0.0    | 1 | 0.0254   | 0.00548  | 0.00257  | 2.01e-09 | 6.03e-08% |
| L319     | False | OD1      | 1.59e-09 | 1.44e-07% | 0.0    | 1 | 0.018    | 0.00287  | 0.00106  | 1.22e-09 | 3.65e-08% |
| L170     | False | OD1      | 1.55e-09 | 1.42e-07% | 0.0    | 1 | 0.0416   | 0.0211   | 0.00948  | 3.2e-09  | 9.59e-08% |
| L1042    | False | koll11   | 1.5e-09  | 1.36e-07% | 0.0    | 1 | 0.0238   | 0.00306  | 0.00668  | 2.74e-09 | 8.22e-08% |
| L1682    | False | OD1      | 1.39e-09 | 1.26e-07% | 0.0    | 1 | 0.0173   | 0.0039   | 0.00109  | 1.03e-09 | 3.1e-08%  |
| L1103    | False | koll11   | 1.09e-09 | 9.9e-08%  | 0.0    | 1 | 0.00857  | 0.000108 | 0.000353 | 1.89e-09 | 5.66e-08% |
| L1043    | False | koll11   | 8.18e-10 | 7.44e-08% | 0.0    | 1 | 0.0153   | 0.00232  | 0.00636  | 2.11e-09 | 6.33e-08% |
| L230     | False | ABY1     | 8.1e-10  | 7.37e-08% | 0.0    | 1 | 0.0115   | 0.00276  | 0.00123  | 1.28e-09 | 3.86e-08% |
| OTU_7230 | True  | ABY1     | 7.69e-10 | 7e-08%    | 0.0    | 1 | 0.00783  | 0.00128  | 0.000231 | 8.86e-10 | 2.66e-08% |
| L164     | False | ABY1     | 6.17e-10 | 5.62e-08% | 0.0    | 1 | 0.00524  | 0.000484 | 4.5e-05  | 1.1e-09  | 3.31e-08% |
| OTU_6022 | True  | OD1      | 5.75e-10 | 5.23e-08% | 0.0    | 1 | 0.00616  | 0.00142  | 0.000151 | 8.21e-10 | 2.47e-08% |
| L1124    | False | koll11   | 4.58e-10 | 4.17e-08% | 0.0    | 1 | 0.00444  | 0.0003   | 0.000347 | 6.49e-10 | 1.95e-08% |
| L249     | False | ABY1     | 4.37e-10 | 3.98e-08% | 0.0    | 1 | 0.00497  | 0.00137  | 0.000155 | 7.23e-10 | 2.17e-08% |
| L169     | False | OD1      | 4.29e-10 | 3.9e-08%  | 0.0    | 1 | 0.0518   | 0.0421   | 0.03     | 5.11e-09 | 1.53e-07% |
| L1421    | False | ZB2      | 4.16e-10 | 3.79e-08% | 0.0    | 1 | 0.000175 | 0.00311  | 0.00635  | 1.1e-09  | 3.29e-08% |
| OTU_8209 | True  | ABY1     | 3.7e-10  | 3.37e-08% | 0.0    | 1 | 5.71e-05 | 0.00538  | 0.00272  | 1.81e-09 | 5.43e-08% |
| L324     | False | ABY1     | 3.42e-10 | 3.11e-08% | 0.0    | 1 | 0.00332  | 0.000489 | 8.77e-05 | 5e-10    | 1.5e-08%  |
| L1455    | False | ZB2      | 3.4e-10  | 3.09e-08% | 0.0    | 1 | 0.000744 | 0.00485  | 0.00737  | 9.15e-10 | 2.75e-08% |
| L1566    | False | ZB2      | 3.16e-10 | 2.88e-08% | 0.0    | 1 | 0.00418  | 0.000608 | 0.000661 | 4.21e-10 | 1.26e-08% |
| L1788    | False | OD1      | 3.15e-10 | 2.87e-08% | 0.0    | 1 | 0.00347  | 0.000443 | 0.000295 | 3.13e-10 | 9.41e-09% |
| L1295    | False | TM7-3    | 3.06e-10 | 2.79e-08% | 0.0    | 1 | 3.44e-06 | 0.000104 | 0.00262  | 9.45e-10 | 2.84e-08% |
| L763     | False | PBS-25   | 2.62e-10 | 2.39e-08% | 0.0    | 1 | 0.00213  | 0.000218 | 5.83e-08 | 7.63e-10 | 2.29e-08% |
| L369     | False | Bacteria | 2.58e-10 | 2.35e-08% | 0.0    | 1 | 0.85     | 0.854    | 0.92     | 2.05e-09 | 6.16e-08% |
| L1300    | False | EW055    | 2.48e-10 | 2.26e-08% | 0.0    | 1 | 0.00215  | 0.000186 | 4.94e-05 | 7.8e-10  | 2.34e-08% |
| L682     | False | koll11   | 2.46e-10 | 2.24e-08% | 0.0    | 1 | 0.00501  | 0.0014   | 0.00129  | 5.97e-10 | 1.79e-08% |
| OTU_5548 | True  | OD1      | 2.29e-10 | 2.09e-08% | 0.0    | 1 | 0.00266  | 0.000215 | 0.000472 | 3.23e-10 | 9.69e-09% |
| L774     | False | PBS-25   | 1.88e-10 | 1.71e-08% | 0.0    | 1 | 0.00218  | 0.000217 | 0.00032  | 6.17e-10 | 1.85e-08% |
| OTU_7396 | True  | ABY1     | 1.79e-10 | 1.63e-08% | 0.0    | 1 | 0.00245  | 0.000976 | 0.00016  | 7.96e-10 | 2.39e-08% |
| L922     | False | koll11   | 1.71e-10 | 1.56e-08% | 0.0    | 1 | 0.00113  | 3.48e-06 | 3.29e-06 | 2.78e-10 | 8.35e-09% |
| L896     | False | koll11   | 1.53e-10 | 1.39e-08% | 0.0    | 1 | 0.00379  | 0.000992 | 0.0017   | 7.71e-10 | 2.31e-08% |
| OTU_851  | True  | koll11   | 1.49e-10 | 1.35e-08% | 0.0    | 1 | 0.00141  | 0.000118 | 9.12e-05 | 2.9e-10  | 8.69e-09% |
| L884     | False | koll11   | 1.48e-10 | 1.35e-08% | 0.0    | 1 | 0.00318  | 0.00167  | 0.000579 | 7.25e-10 | 2.18e-08% |
| L1732    | False | Mb-NB09  | 1.25e-10 | 1.14e-08% | 0.0    | 1 | 0.00163  | 0.00105  | 6.99e-05 | 5.87e-10 | 1.76e-08% |
| L689     | False | koll11   | 1.21e-10 | 1.1e-08%  | 0.0    | 1 | 0.00252  | 0.000512 | 0.00112  | 4.24e-10 | 1.27e-08% |
| OTU_4847 | True  | ZB2      | 1.13e-10 | 1.03e-08% | 0.0    | 1 | 0.000864 | 4.88e-05 | 5.03e-06 | 1.58e-10 | 4.73e-09% |
| OTU_7190 | True  | ABY1     | 1.1e-10  | 1e-08%    | 0.0    | 1 | 0.0      | 0.0013   | 0.000245 | 3.27e-10 | 9.82e-09% |
| L384     | False | ABY1     | 1.07e-10 | 9.77e-09% | 0.0    | 1 | 0.000769 | 2.22e-05 | 4.17e-06 | 1.65e-10 | 4.95e-09% |
| L1729    | False | Mb-NB09  | 1.07e-10 | 9.71e-09% | 0.0    | 1 | 0.00263  | 0.00138  | 0.000604 | 7.13e-10 | 2.14e-08% |
| L640     | False | PBS-25   | 9.79e-11 | 8.91e-09% | 0.0    | 1 | 0.000692 | 1.6e-05  | 4.22e-06 | 1.64e-10 | 4.93e-09% |
| L388     | False | ABY1     | 8.78e-11 | 7.99e-09% | 0.0    | 1 | 0.0117   | 0.00848  | 0.00762  | 1.62e-09 | 4.86e-08% |
| L1633    | False | ZB2      | 7.77e-11 | 7.07e-09% | 0.0    | 1 | 0.00282  | 0.00141  | 0.00106  | 9.35e-10 | 2.81e-08% |
| OTU_6407 | True  | ZB2      | 7.34e-11 | 6.68e-09% | 0.0    | 1 | 1.06e-05 | 0.00111  | 0.000529 | 1.32e-10 | 3.97e-09% |
| OTU_7956 | True  | OD1      | 6.33e-11 | 5.77e-09% | 0.0    | 1 | 0.000521 | 7.01e-05 | 0.000979 | 3.33e-10 | 9.98e-09% |
| OTU_876  | True  | koll11   | 6.04e-11 | 5.5e-09%  | 0.0    | 1 | 0.000382 | 0.0      | 0.0      | 1.22e-10 | 3.66e-09% |
| OTU_5946 | True  | OD1      | 5.89e-11 | 5.36e-09% | 0.0    | 1 | 0.000548 | 4.09e-05 | 3.98e-05 | 1.36e-10 | 4.07e-09% |
| L795     | False | PBS-25   | 5e-11    | 4.55e-09% | 0.0    | 1 | 0.000527 | 0.000409 | 3.56e-06 | 2.12e-10 | 6.35e-09% |
| OTU_309  | True  | PBS-25   | 3.5e-11  | 3.19e-09% | 0.0    | 1 | 0.000478 | 6.21e-05 | 0.000119 | 1.32e-10 | 3.97e-09% |
| OTU_5803 | True  | OD1      | 3.19e-11 | 2.9e-09%  | 0.0    | 1 | 0.000274 | 1.4e-05  | 1.78e-05 | 1.03e-10 | 3.08e-09% |
| OTU_6715 | True  | ZB2      | 3.15e-11 | 2.87e-09% | 0.0    | 1 | 0.000279 | 4.37e-05 | 3.3e-06  | 8.65e-11 | 2.6e-09%  |
| L371     | False | ABY1     | 2.86e-11 | 2.6e-09%  | 0.0    | 1 | 0.00068  | 0.000226 | 0.000229 | 2.61e-10 | 7.84e-09% |
| OTU_411  | True  | koll11   | 2.78e-11 | 2.53e-09% | 0.0    | 1 | 0.000342 | 5.56e-05 | 4.77e-05 | 1.21e-10 | 3.64e-09% |
| OTU_6109 | True  | ZB2      | 2.75e-11 | 2.51e-09% | 0.0    | 1 | 4.14e-06 | 0.000414 | 0.000314 | 7.86e-11 | 2.36e-09% |
| OTU_6578 | True  | WCHBI-64 | 2.32e-11 | 2.11e-09% | 0.0    | 1 | 0.000112 | 7.92e-05 | 0.000464 | 1.6e-10  | 4.81e-09% |
| OTU_5244 | True  | OD1      | 2.07e-11 | 1.88e-09% | 0.0    | 1 | 0.000222 | 5.87e-05 | 8.28e-06 | 9.03e-11 | 2.71e-09% |
| OTU_1017 | True  | PRR-12   | 2.07e-11 | 1.88e-09% | 0.0    | 1 | 0.000166 | 0.0      | 2.43e-05 | 7.59e-11 | 2.28e-09% |
| OTU_5805 | True  | OD1      | 1.91e-11 | 1.74e-09% | 0.0    | 1 | 0.000302 | 0.000177 | 3.09e-05 | 9.9e-11  | 2.97e-09% |
| OTU_6594 | True  | ZB2      | 1.73e-11 | 1.57e-09% | 0.0    | 1 | 0.000144 | 2.44e-05 | 0.0      | 5.95e-11 | 1.79e-09% |
| L1751    | False | OD1      | 1.11e-11 | 1.01e-09% | 0.0    | 1 | 0.000721 | 0.00111  | 0.00154  | 6.46e-10 | 1.94e-08% |
| OTU_9186 | True  | Mb-NB09  | 6.2e-12  | 5.64e-10% | 0.0    | 1 | 0.00013  | 9.95e-05 | 2.45e-05 | 6.17e-11 | 1.85e-09% |
| L0       | False | Bacteria | 4.19e-17 | 3.81e-15% | 0.0731 | 0 | 1.0      | 1.0      | 1.0      | 1.26e-16 | 3.77e-15% |
| L1       | False | Bacteria | 1.92e-17 | 1.75e-15% | 0.0731 | 0 | 1.0      | 1.0      | 1.0      | 5.78e-17 | 1.73e-15% |
| L1960    | False | Archaea  | 0.0      | 0.0%      | 1.0    | 0 | 0.0      | 0.0      | 0.0      | 0.0      | 0.0%      |
| L1975    | False | Archaea  | 0.0      | 0.0%      | 1.0    | 0 | 0.0      | 0.0      | 0.0      | 0.0      | 0.0%      |



|           |       |         |     |      |     |   |     |     |     |     |      |
|-----------|-------|---------|-----|------|-----|---|-----|-----|-----|-----|------|
| OTU_10936 | True  | Archaea | 0.0 | 0.0% | 1.0 | 0 | 0.0 | 0.0 | 0.0 | 0.0 | 0.0% |
| OTU_10954 | True  | Archaea | 0.0 | 0.0% | 1.0 | 0 | 0.0 | 0.0 | 0.0 | 0.0 | 0.0% |
| L1984     | False | Archaea | 0.0 | 0.0% | 1.0 | 0 | 0.0 | 0.0 | 0.0 | 0.0 | 0.0% |
| L1983     | False | Archaea | 0.0 | 0.0% | 1.0 | 0 | 0.0 | 0.0 | 0.0 | 0.0 | 0.0% |
| OTU_10977 | True  | Archaea | 0.0 | 0.0% | 1.0 | 0 | 0.0 | 0.0 | 0.0 | 0.0 | 0.0% |
| L1981     | False | Archaea | 0.0 | 0.0% | 1.0 | 0 | 0.0 | 0.0 | 0.0 | 0.0 | 0.0% |
| OTU_13    | True  | Archaea | 0.0 | 0.0% | 1.0 | 0 | 0.0 | 0.0 | 0.0 | 0.0 | 0.0% |
| OTU_10991 | True  | Archaea | 0.0 | 0.0% | 1.0 | 0 | 0.0 | 0.0 | 0.0 | 0.0 | 0.0% |
| OTU_11097 | True  | Archaea | 0.0 | 0.0% | 1.0 | 0 | 0.0 | 0.0 | 0.0 | 0.0 | 0.0% |
| L1977     | False | Archaea | 0.0 | 0.0% | 1.0 | 0 | 0.0 | 0.0 | 0.0 | 0.0 | 0.0% |
| OTU_11020 | True  | Archaea | 0.0 | 0.0% | 1.0 | 0 | 0.0 | 0.0 | 0.0 | 0.0 | 0.0% |
| L1974     | False | Archaea | 0.0 | 0.0% | 1.0 | 0 | 0.0 | 0.0 | 0.0 | 0.0 | 0.0% |
| L1988     | False | Archaea | 0.0 | 0.0% | 1.0 | 0 | 0.0 | 0.0 | 0.0 | 0.0 | 0.0% |
| L1973     | False | Archaea | 0.0 | 0.0% | 1.0 | 0 | 0.0 | 0.0 | 0.0 | 0.0 | 0.0% |
| L1972     | False | Archaea | 0.0 | 0.0% | 1.0 | 0 | 0.0 | 0.0 | 0.0 | 0.0 | 0.0% |
| OTU_11044 | True  | Archaea | 0.0 | 0.0% | 1.0 | 0 | 0.0 | 0.0 | 0.0 | 0.0 | 0.0% |
| OTU_11073 | True  | Archaea | 0.0 | 0.0% | 1.0 | 0 | 0.0 | 0.0 | 0.0 | 0.0 | 0.0% |
| L1969     | False | Archaea | 0.0 | 0.0% | 1.0 | 0 | 0.0 | 0.0 | 0.0 | 0.0 | 0.0% |
| L1968     | False | Archaea | 0.0 | 0.0% | 1.0 | 0 | 0.0 | 0.0 | 0.0 | 0.0 | 0.0% |
| OTU_11306 | True  | Archaea | 0.0 | 0.0% | 1.0 | 0 | 0.0 | 0.0 | 0.0 | 0.0 | 0.0% |
| OTU_11297 | True  | Archaea | 0.0 | 0.0% | 1.0 | 0 | 0.0 | 0.0 | 0.0 | 0.0 | 0.0% |
| L1965     | False | Archaea | 0.0 | 0.0% | 1.0 | 0 | 0.0 | 0.0 | 0.0 | 0.0 | 0.0% |
| OTU_11207 | True  | Archaea | 0.0 | 0.0% | 1.0 | 0 | 0.0 | 0.0 | 0.0 | 0.0 | 0.0% |
| OTU_10884 | True  | Archaea | 0.0 | 0.0% | 1.0 | 0 | 0.0 | 0.0 | 0.0 | 0.0 | 0.0% |
| L1987     | False | Archaea | 0.0 | 0.0% | 1.0 | 0 | 0.0 | 0.0 | 0.0 | 0.0 | 0.0% |
| OTU_10976 | True  | Archaea | 0.0 | 0.0% | 1.0 | 0 | 0.0 | 0.0 | 0.0 | 0.0 | 0.0% |
| OTU_11266 | True  | Archaea | 0.0 | 0.0% | 1.0 | 0 | 0.0 | 0.0 | 0.0 | 0.0 | 0.0% |
| OTU_10957 | True  | Archaea | 0.0 | 0.0% | 1.0 | 0 | 0.0 | 0.0 | 0.0 | 0.0 | 0.0% |
| OTU_21    | True  | Archaea | 0.0 | 0.0% | 1.0 | 0 | 0.0 | 0.0 | 0.0 | 0.0 | 0.0% |
| L2012     | False | Archaea | 0.0 | 0.0% | 1.0 | 0 | 0.0 | 0.0 | 0.0 | 0.0 | 0.0% |
| OTU_20    | True  | Archaea | 0.0 | 0.0% | 1.0 | 0 | 0.0 | 0.0 | 0.0 | 0.0 | 0.0% |
| L2010     | False | Archaea | 0.0 | 0.0% | 1.0 | 0 | 0.0 | 0.0 | 0.0 | 0.0 | 0.0% |
| OTU_10959 | True  | Archaea | 0.0 | 0.0% | 1.0 | 0 | 0.0 | 0.0 | 0.0 | 0.0 | 0.0% |
| L2008     | False | Archaea | 0.0 | 0.0% | 1.0 | 0 | 0.0 | 0.0 | 0.0 | 0.0 | 0.0% |
| OTU_11285 | True  | Archaea | 0.0 | 0.0% | 1.0 | 0 | 0.0 | 0.0 | 0.0 | 0.0 | 0.0% |
| OTU_11271 | True  | Archaea | 0.0 | 0.0% | 1.0 | 0 | 0.0 | 0.0 | 0.0 | 0.0 | 0.0% |
| OTU_11308 | True  | Archaea | 0.0 | 0.0% | 1.0 | 0 | 0.0 | 0.0 | 0.0 | 0.0 | 0.0% |
| L2004     | False | Archaea | 0.0 | 0.0% | 1.0 | 0 | 0.0 | 0.0 | 0.0 | 0.0 | 0.0% |
| OTU_11284 | True  | Archaea | 0.0 | 0.0% | 1.0 | 0 | 0.0 | 0.0 | 0.0 | 0.0 | 0.0% |
| L2002     | False | Archaea | 0.0 | 0.0% | 1.0 | 0 | 0.0 | 0.0 | 0.0 | 0.0 | 0.0% |
| OTU_22    | True  | Archaea | 0.0 | 0.0% | 1.0 | 0 | 0.0 | 0.0 | 0.0 | 0.0 | 0.0% |
| L2000     | False | Archaea | 0.0 | 0.0% | 1.0 | 0 | 0.0 | 0.0 | 0.0 | 0.0 | 0.0% |
| OTU_11336 | True  | Archaea | 0.0 | 0.0% | 1.0 | 0 | 0.0 | 0.0 | 0.0 | 0.0 | 0.0% |
| L1998     | False | Archaea | 0.0 | 0.0% | 1.0 | 0 | 0.0 | 0.0 | 0.0 | 0.0 | 0.0% |
| OTU_17    | True  | Archaea | 0.0 | 0.0% | 1.0 | 0 | 0.0 | 0.0 | 0.0 | 0.0 | 0.0% |
| L1996     | False | Archaea | 0.0 | 0.0% | 1.0 | 0 | 0.0 | 0.0 | 0.0 | 0.0 | 0.0% |
| L1995     | False | Archaea | 0.0 | 0.0% | 1.0 | 0 | 0.0 | 0.0 | 0.0 | 0.0 | 0.0% |
| OTU_11180 | True  | Archaea | 0.0 | 0.0% | 1.0 | 0 | 0.0 | 0.0 | 0.0 | 0.0 | 0.0% |
| L1993     | False | Archaea | 0.0 | 0.0% | 1.0 | 0 | 0.0 | 0.0 | 0.0 | 0.0 | 0.0% |
| L1992     | False | Archaea | 0.0 | 0.0% | 1.0 | 0 | 0.0 | 0.0 | 0.0 | 0.0 | 0.0% |
| OTU_11000 | True  | Archaea | 0.0 | 0.0% | 1.0 | 0 | 0.0 | 0.0 | 0.0 | 0.0 | 0.0% |
| L1962     | False | Archaea | 0.0 | 0.0% | 1.0 | 0 | 0.0 | 0.0 | 0.0 | 0.0 | 0.0% |
| OTU_11312 | True  | Archaea | 0.0 | 0.0% | 1.0 | 0 | 0.0 | 0.0 | 0.0 | 0.0 | 0.0% |
| OTU_11167 | True  | Archaea | 0.0 | 0.0% | 1.0 | 0 | 0.0 | 0.0 | 0.0 | 0.0 | 0.0% |
| L1921     | False | Archaea | 0.0 | 0.0% | 1.0 | 0 | 0.0 | 0.0 | 0.0 | 0.0 | 0.0% |
| OTU_11194 | True  | Archaea | 0.0 | 0.0% | 1.0 | 0 | 0.0 | 0.0 | 0.0 | 0.0 | 0.0% |
| L1930     | False | Archaea | 0.0 | 0.0% | 1.0 | 0 | 0.0 | 0.0 | 0.0 | 0.0 | 0.0% |
| OTU_11276 | True  | Archaea | 0.0 | 0.0% | 1.0 | 0 | 0.0 | 0.0 | 0.0 | 0.0 | 0.0% |
| OTU_10942 | True  | Archaea | 0.0 | 0.0% | 1.0 | 0 | 0.0 | 0.0 | 0.0 | 0.0 | 0.0% |
| OTU_11120 | True  | Archaea | 0.0 | 0.0% | 1.0 | 0 | 0.0 | 0.0 | 0.0 | 0.0 | 0.0% |
| L1926     | False | Archaea | 0.0 | 0.0% | 1.0 | 0 | 0.0 | 0.0 | 0.0 | 0.0 | 0.0% |
| L1925     | False | Archaea | 0.0 | 0.0% | 1.0 | 0 | 0.0 | 0.0 | 0.0 | 0.0 | 0.0% |
| OTU_10973 | True  | Archaea | 0.0 | 0.0% | 1.0 | 0 | 0.0 | 0.0 | 0.0 | 0.0 | 0.0% |
| L1923     | False | Archaea | 0.0 | 0.0% | 1.0 | 0 | 0.0 | 0.0 | 0.0 | 0.0 | 0.0% |
| L1922     | False | Archaea | 0.0 | 0.0% | 1.0 | 0 | 0.0 | 0.0 | 0.0 | 0.0 | 0.0% |

|           |       |         |                    |                     |     |   |          |          |          |          |           |
|-----------|-------|---------|--------------------|---------------------|-----|---|----------|----------|----------|----------|-----------|
| OTU_10967 | True  | Archaea | 0.0                | 0.0%                | 1.0 | 0 | 0.0      | 0.0      | 0.0      | 0.0      | 0.0%      |
| L1959     | False | Archaea | 0.0                | 0.0%                | 1.0 | 0 | 0.0      | 0.0      | 0.0      | 0.0      | 0.0%      |
| L1919     | False | Archaea | 0.0                | 0.0%                | 1.0 | 0 | 0.0      | 0.0      | 0.0      | 0.0      | 0.0%      |
| L1918     | False | Archaea | 0.0                | 0.0%                | 1.0 | 0 | 0.0      | 0.0      | 0.0      | 0.0      | 0.0%      |
| OTU_11012 | True  | Archaea | 0.0                | 0.0%                | 1.0 | 0 | 0.0      | 0.0      | 0.0      | 0.0      | 0.0%      |
| OTU_11188 | True  | Archaea | 0.0                | 0.0%                | 1.0 | 0 | 0.0      | 0.0      | 0.0      | 0.0      | 0.0%      |
| L1915     | False | Archaea | 0.0                | 0.0%                | 1.0 | 0 | 0.0      | 0.0      | 0.0      | 0.0      | 0.0%      |
| L1914     | False | Archaea | 0.0                | 0.0%                | 1.0 | 0 | 0.0      | 0.0      | 0.0      | 0.0      | 0.0%      |
| L1913     | False | Archaea | 0.0                | 0.0%                | 1.0 | 0 | 0.0      | 0.0      | 0.0      | 0.0      | 0.0%      |
| L1912     | False | Archaea | 0.0                | 0.0%                | 1.0 | 0 | 0.0      | 0.0      | 0.0      | 0.0      | 0.0%      |
| OTU_5181  | True  | BB36    | 0.0                | 0.0%                | 1.0 | 0 | 0.0      | 0.0      | 0.0      | 0.0      | 0.0%      |
| OTU_8171  | True  | TM7-3   | 0.0                | 0.0%                | 1.0 | 0 | 0.0      | 0.0      | 0.0      | 0.0      | 0.0%      |
| L1932     | False | Archaea | 0.0                | 0.0%                | 1.0 | 0 | 0.0      | 0.0      | 0.0      | 0.0      | 0.0%      |
| OTU_11121 | True  | Archaea | 0.0                | 0.0%                | 1.0 | 0 | 0.0      | 0.0      | 0.0      | 0.0      | 0.0%      |
| OTU_11281 | True  | Archaea | 0.0                | 0.0%                | 1.0 | 0 | 0.0      | 0.0      | 0.0      | 0.0      | 0.0%      |
| OTU_11341 | True  | Archaea | 0.0                | 0.0%                | 1.0 | 0 | 0.0      | 0.0      | 0.0      | 0.0      | 0.0%      |
| OTU_102   | True  | Archaea | 0.0                | 0.0%                | 1.0 | 0 | 0.0      | 0.0      | 0.0      | 0.0      | 0.0%      |
| L1955     | False | Archaea | 0.0                | 0.0%                | 1.0 | 0 | 0.0      | 0.0      | 0.0      | 0.0      | 0.0%      |
| OTU_3999  | True  | Archaea | 0.0                | 0.0%                | 1.0 | 0 | 0.0      | 0.0      | 0.0      | 0.0      | 0.0%      |
| L1953     | False | Archaea | 0.0                | 0.0%                | 1.0 | 0 | 0.0      | 0.0      | 0.0      | 0.0      | 0.0%      |
| OTU_144   | True  | Archaea | 0.0                | 0.0%                | 1.0 | 0 | 0.0      | 0.0      | 0.0      | 0.0      | 0.0%      |
| L1951     | False | Archaea | 0.0                | 0.0%                | 1.0 | 0 | 0.0      | 0.0      | 0.0      | 0.0      | 0.0%      |
| L1950     | False | Archaea | 0.0                | 0.0%                | 1.0 | 0 | 0.0      | 0.0      | 0.0      | 0.0      | 0.0%      |
| L1949     | False | Archaea | 0.0                | 0.0%                | 1.0 | 0 | 0.0      | 0.0      | 0.0      | 0.0      | 0.0%      |
| OTU_11287 | True  | Archaea | 0.0                | 0.0%                | 1.0 | 0 | 0.0      | 0.0      | 0.0      | 0.0      | 0.0%      |
| L1935     | False | Archaea | 0.0                | 0.0%                | 1.0 | 0 | 0.0      | 0.0      | 0.0      | 0.0      | 0.0%      |
| L1946     | False | Archaea | 0.0                | 0.0%                | 1.0 | 0 | 0.0      | 0.0      | 0.0      | 0.0      | 0.0%      |
| L1945     | False | Archaea | 0.0                | 0.0%                | 1.0 | 0 | 0.0      | 0.0      | 0.0      | 0.0      | 0.0%      |
| OTU_10979 | True  | Archaea | 0.0                | 0.0%                | 1.0 | 0 | 0.0      | 0.0      | 0.0      | 0.0      | 0.0%      |
| OTU_11015 | True  | Archaea | 0.0                | 0.0%                | 1.0 | 0 | 0.0      | 0.0      | 0.0      | 0.0      | 0.0%      |
| OTU_11153 | True  | Archaea | 0.0                | 0.0%                | 1.0 | 0 | 0.0      | 0.0      | 0.0      | 0.0      | 0.0%      |
| L1941     | False | Archaea | 0.0                | 0.0%                | 1.0 | 0 | 0.0      | 0.0      | 0.0      | 0.0      | 0.0%      |
| L1940     | False | Archaea | 0.0                | 0.0%                | 1.0 | 0 | 0.0      | 0.0      | 0.0      | 0.0      | 0.0%      |
| OTU_10982 | True  | Archaea | 0.0                | 0.0%                | 1.0 | 0 | 0.0      | 0.0      | 0.0      | 0.0      | 0.0%      |
| L1938     | False | Archaea | 0.0                | 0.0%                | 1.0 | 0 | 0.0      | 0.0      | 0.0      | 0.0      | 0.0%      |
| OTU_10944 | True  | Archaea | 0.0                | 0.0%                | 1.0 | 0 | 0.0      | 0.0      | 0.0      | 0.0      | 0.0%      |
| OTU_10946 | True  | Archaea | 0.0                | 0.0%                | 1.0 | 0 | 0.0      | 0.0      | 0.0      | 0.0      | 0.0%      |
| OTU_112   | True  | Archaea | 0.0                | 0.0%                | 1.0 | 0 | 0.0      | 0.0      | 0.0      | 0.0      | 0.0%      |
| OTU_8811  | True  | TM7-1   | -4.12666858936e-09 | -3.75625562533e-07% | 1.0 | 0 | 0.000125 | 0.00015  | 0.000111 | 1.31e-05 | 0.000392% |
| L1478     | False | ZB2     | -2.61521032376e-08 | -2.38046702256e-06% | 1.0 | 0 | 0.000269 | 0.000387 | 0.000302 | 1.01e-05 | 0.000303% |
| L1674     | False | OD1     | -2.91522705834e-08 | -2.65355402302e-06% | 1.0 | 0 | 0.00031  | 0.000362 | 0.000306 | 1.51e-05 | 0.000453% |
| L1746     | False | OD1     | -9.75070249994e-08 | -8.87547190262e-06% | 1.0 | 0 | 0.00139  | 0.00172  | 0.00185  | 5.03e-05 | 0.00151%  |
